# Supplementary material for: Colony formation in Phaeocystis antarctica : connecting molecular mechanisms with iron biogeochemistry
Source: Copernicus journal article supplement (doi:10.5194/bg-15-4923-2018), 2018-08-21
Supplement: Supplementary file 1 [file bg-15-4923-2018-supplement.zip]

Archive with 4 entries (4 files):
- Supplemental Data 1_071718.xls
- bg-15-4923-2018-supplement-title-page.pdf
- Supplemental_Materials_081118.pdf
- Supplemental Data 2_072018.xls
