# Supplementary material for: Colony formation in Phaeocystis antarctica : connecting molecular mechanisms with iron biogeochemistry
Source: Copernicus journal article supplement (doi:10.5194/bg-15-4923-2018), 2018-08-21
Supplement: Supplementary file 1 [file bg-15-4923-2018-supplement.zip › bg-15-4923-2018-supplement-title-page.pdf]

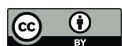

*Supplement of*

## **Colony formation in *Phaeocystis antarctica*: connecting molecular mechanisms with iron biogeochemistry**

**Sara J. Bender et al.**

*Correspondence to:* Mak A. Saito ([msaito@whoi.edu](mailto:msaito@whoi.edu))

- [bg-15-4923-2018-supplement-title-page.pdf](#)
- [Supplemental Data 1\\_071718.xls](#)
- [Supplemental Data 2\\_072018.xls](#)
- [Supplemental\\_Materials\\_081118.pdf](#)

The copyright of individual parts of the supplement might differ from the CC BY 4.0 License.
