# Supplementary material for: Colony formation in Phaeocystis antarctica : connecting molecular mechanisms with iron biogeochemistry
Source: Copernicus journal article supplement (doi:10.5194/bg-15-4923-2018), 2018-08-21
Supplement: Supplementary file 1 [file bg-15-4923-2018-supplement.zip › Supplemental Data 2_072018.xls]

## Sheet: Readme
Dataset Supplemental S2
Descriptionn of Tabs in file:
S2A	MetaT is the metatranscriptomic results from the Ross Sea field pellet (combined Total RNA and Poly(A) enriched (KELP))
S2B	MetaP-Strains-db-1D is the metaproteomic results acquired using Database #1 (Phaeocystis strains) using 1D chromatography
S2C	MetaP-Strains-db-2D is the metaproteomic results acquired using Database #1 (Phaeocystis strains) using 2D chromatography
S2D	MetaP-RossSeaMetaT-db-1D is the metaproteomic results acquired using Database #2 (MetaT results) using 1D chromatography
S2E	MetaP-RossSeaMetaT-db-2D is the metaproteomic results acquired using Database #2 (MetaT results) using 2D chromatography
S2F	MetaP-Bacteria-db-1D is the metaproteomic results acquired using Database #3 (Amundsen Sea metagenomes) using 1D chromatography
S2G	MetaP-Bacteria-db-2D is the metaproteomic results acquired using Database #3 (Amundsen Sea metagenomes) using 2D chromatography
S2H	Counts by Taxon Group for Venn Diagram

## Sheet: MetaT
Table S2A. Transcripts identified from Ross Sea field sample
orf_id	contig_length	orf_length	kegg_hit	kegg_desc	kegg_pathway	KO	KO_desc	KO_pathway	EC	uniprot	KOG_id	KOG_desc	KOG_class	KOG_group	best_hit	best_hit_percent_identity	best_hit_annotation	best_hit_GOS_core_cluster	best_hit_species	best_hit_taxon_id	domain	group	group_reads	group_orfs	best_LPI	hits_top	hits_unique	best_LPI_tax_string	PFams	PFams_desc	TIGRFams	TIGRFams_desc	transporter_family	transporter_substrate	transporter_evidence	transmembrane_domains	2005BLOOMSS-PE-IL9	KELP2005BLOOM-PE-ILI7
contig_100818_1_442_-	442	442																				[unknown]			0	0	0		PF09769	Apolipoprotein O						0	1	63
contig_101276_1_317_-	434	317																				[unknown]			0	0	0		PF00041	Fibronectin type III domain						1	0	54
contig_101467_1_314_+	314	314																				[unknown]			0	0	0		_GAP_||PF07557||_GAP_	_GAP_||Shugoshin C terminus||_GAP_						0	3	49
contig_101485_1_340_+	340	340																				[unknown]			0	0	0		_GAP_||PF10601	_GAP_||LITAF-like zinc ribbon domain						0	0	82
contig_101689_1_423_+	423	423	bgd:bgla_2g15140	chitinase B												67.8						[unknown]			0	0	0		PF00182||_GAP_	Chitinase class I||_GAP_						0	1	58
contig_102087_1_453_-	453	453																				[unknown]			0	0	0		PF00024||_GAP_	PAN domain||_GAP_						0	6	145
contig_107503_1_350_-	390	350																				[unknown]			0	0	0		_GAP_||PF00047	_GAP_||Immunoglobulin domain						0	0	52
contig_108311_15139_15300_+	42785	162																				[unknown]			0	0	0		PF00216	Bacterial DNA-binding protein						0	1	215
contig_109411_985_1257_-	1351	273																				[unknown]			0	0	0		PF03247	Prothymosin/parathymosin family						0	359	1907
contig_10964_1_483_+	483	483																				[unknown]			0	0	0		PF11907	Domain of unknown function (DUF3427)						0	121	0
contig_109850_1071_1877_+	2329	807																				[unknown]			0	0	0		_GAP_||PF01429||_GAP_	_GAP_||Methyl-CpG binding domain||_GAP_						0	10	296
contig_110788_1_958_+	1532	958																				[unknown]			0	0	0		_GAP_||PF07707||_GAP_	_GAP_||BTB And C-terminal Kelch||_GAP_						0	8	1414
contig_111283_104_220_-	638	117																				[unknown]			0	0	0		PF00137	ATP synthase subunit C						1	4	63
contig_111933_1112_1344_+	1345	233	nve:NEMVE_v1g188544	hypothetical protein ; K00384 thioredoxin reductase (NADPH) [EC:1.8.1.9]	nve00240||nve00450	K00384	thioredoxin reductase (NADPH) [EC:1.8.1.9]	Pyrimidine metabolism || Selenocompound metabolism	1.8.1.9	A7SDH7	KOG4716	Thioredoxin reductase	Posttranslational modification, protein turnover, chaperones	CELLULAR PROCESSES AND SIGNALING		68.12						[unknown]			0	0	0		PF07992	Pyridine nucleotide-disulphide oxidoreductase						0	0	143
contig_111957_95_400_-	572	306																				[unknown]			0	0	0		PF09026	Centromere protein B dimerisation domain						2	8	153
contig_112058_84_618_+	618	535																				[unknown]			0	0	0		_GAP_||PF11699	_GAP_||Mif2/CENP-C like						0	10	204
contig_112261_1_679_-	679	679																				[unknown]			0	0	0		PF12937||_GAP_	F-box-like||_GAP_						0	0	99
contig_112862_54_432_+	432	379																				[unknown]			0	0	0		PF05478	Prominin						2	3	56
contig_113949_1166_1257_+	1258	92																				[unknown]			0	0	0		PF00082	Subtilase family						0	1	179
contig_11526_936_1151_+	1277	216																				[unknown]			0	0	0		PF07043	Protein of unknown function (DUF1328)						2	81	0
contig_115743_1_796_+	796	796																				[unknown]			0	0	0		_GAP_||PF00096||_GAP_	_GAP_||Zinc finger, C2H2 type||_GAP_						0	11	357
contig_116106_137_924_-	924	788																				[unknown]			0	0	0		_GAP_||PF00652||_GAP_	_GAP_||Ricin-type beta-trefoil lectin domain||_GAP_						0	0	180
contig_116815_124_709_+	709	586																				[unknown]			0	0	0		PF12937||_GAP_	F-box-like||_GAP_						0	0	213
contig_116879_181_594_+	594	414																				[unknown]			0	0	0		_GAP_||PF00024	_GAP_||PAN domain						0	1	304
contig_117938_244_597_-	873	354																				[unknown]			0	0	0		PF15346	PF15346						0	0	101
contig_119485_420_619_-	619	200																				[unknown]			0	0	0		PF13882	PF13882						0	2	194
contig_120197_405_898_-	898	494																				[unknown]			0	0	0		PF00652	Ricin-type beta-trefoil lectin domain						0	5	75
contig_121024_1_472_-	472	472																				[unknown]			0	0	0		_GAP_||PF05625	_GAP_||PAXNEB protein						0	0	117
contig_121470_1_421_+	680	421	ppp:PHYPADRAFT_159327	hypothetical protein						A9RIV5	KOG2397	Protein kinase C substrate, 80 KD protein, heavy chain	Signal transduction mechanisms	CELLULAR PROCESSES AND SIGNALING		56.3						[unknown]			0	0	0		_GAP_||PF12999	_GAP_||PF12999						0	6	78
contig_121607_1_521_-	521	521																				[unknown]			0	0	0		PF09468	Ydr279p protein family (RNase H2 complex component)						0	0	58
contig_123093_154_561_+	636	408																				[unknown]			0	0	0		PF13833||_GAP_	PF13833||_GAP_						0	45	1887
contig_123094_1_360_-	360	360																				[unknown]			0	0	0		PF01347	Lipoprotein amino terminal region						0	0	65
contig_124117_1_336_+	336	336																				[unknown]			0	0	0		PF14295||_GAP_	PF14295||_GAP_						0	2	49
contig_124129_172_544_-	544	373																				[unknown]			0	0	0		PF00520	Ion transport protein						2	0	71
contig_125026_124_372_-	372	249																				[unknown]			0	0	0		PF05160	DSS1/SEM1 family						0	0	83
contig_125047_121_677_-	677	557																				[unknown]			0	0	0		_GAP_||PF03208	_GAP_||PRA1 family protein						3	8	211
contig_125356_54_496_-	496	443																				[unknown]			0	0	0		PF00651||_GAP_	BTB/POZ domain||_GAP_						0	2	94
contig_126229_66_503_-	503	438																				[unknown]			0	0	0		_GAP_||PF13923	_GAP_||PF13923						0	0	55
contig_126288_96_410_-	447	315																				[unknown]			0	0	0		PF04588	Hypoxia induced protein conserved region						2	2	68
contig_126559_7_312_-	392	306																				[unknown]			0	0	0		_GAP_||PF08880||_GAP_	_GAP_||QLQ||_GAP_						0	2	61
contig_127030_69_523_-	523	455																				[unknown]			0	0	0		PF00096||_GAP_	Zinc finger, C2H2 type||_GAP_						0	1	80
contig_127411_342_513_-	513	172																				[unknown]			0	0	0		PF00335	Tetraspanin family						1	4	48
contig_127911_1_572_-	572	572																				[unknown]			0	0	0		PF09815	XK-related protein						4	0	148
contig_128471_1_379_+	465	379																				[unknown]			0	0	0		PF15110	PF15110						2	9	110
contig_128812_1_546_+	663	546														44.05						[unknown]			0	0	0		PF12697	PF12697						0	0	170
contig_128816_1_336_-	442	336																				[unknown]			0	0	0		_GAP_||PF01391	_GAP_||Collagen triple helix repeat (20 copies)						0	0	86
contig_129530_424_584_-	584	161																				[unknown]			0	0	0		PF01496	V-type ATPase 116kDa subunit family						0	2	159
contig_130698_1_486_+	492	486																				[unknown]			0	0	0		PF13405||_GAP_	EF-hand domain||_GAP_						0	0	73
contig_131434_282_575_-	682	294																				[unknown]			0	0	0		_GAP_||PF00036||_GAP_	_GAP_||EF hand||_GAP_						1	12	1027
contig_131639_162_407_-	709	246																				[unknown]			0	0	0		PF09415	Protein of unknown function (DUF2008)						0	1	72
contig_134345_1_518_+	661	518																				[unknown]			0	0	0		PF00293	NUDIX domain						0	0	163
contig_134809_1_490_-	490	490																				[unknown]			0	0	0		PF07690	Major Facilitator Superfamily			MFS		2	3	3	259
contig_134878_1_402_-	402	402																				[unknown]			0	0	0		PF12009||_GAP_	Telomerase ribonucleoprotein complex - RNA binding domain||_GAP_						0	0	76
contig_135250_83_733_+	733	651																				[unknown]			0	0	0		_GAP_||PF00652	_GAP_||Ricin-type beta-trefoil lectin domain						1	7	161
contig_136726_1_331_+	409	331																				[unknown]			0	0	0		PF00088||_GAP_	Trefoil (P-type) domain||_GAP_						0	7	228
contig_136730_1_243_+	470	243																				[unknown]			0	0	0		_GAP_||PF01549	_GAP_||ShK domain-like						0	9	154
contig_136765_135_620_-	685	486																				[unknown]			0	0	0		PF00538||_GAP_	linker histone H1 and H5 family||_GAP_						0	63	7555
contig_137402_158_656_+	656	499																				[unknown]			0	0	0		_GAP_||PF04886	_GAP_||PT repeat						0	12	381
contig_137827_550_652_+	652	103																				[unknown]			0	0	0		PF00082	Subtilase family						0	1	99
contig_139090_1_334_-	414	334																				[unknown]			0	0	0		PF00335	Tetraspanin family						3	0	146
contig_139223_1_334_+	334	334																				[unknown]			0	0	0		PF00646||_GAP_	F-box domain||_GAP_						0	0	189
contig_139302_187_680_-	680	494																				[unknown]			0	0	0		PF00178||_GAP_	Ets-domain||_GAP_						0	0	65
contig_139484_145_466_-	466	322																				[unknown]			0	0	0		PF08806	Sep15/SelM redox domain						0	0	317
contig_139518_85_521_+	521	437																				[unknown]			0	0	0		PF00651	BTB/POZ domain						0	0	85
contig_140014_1_614_+	614	614																				[unknown]			0	0	0		_GAP_||PF13436	_GAP_||PF13436						2	197	834
contig_140929_1_536_+	581	536																				[unknown]			0	0	0		PF13894||_GAP_	PF13894||_GAP_						0	2	308
contig_141059_1_383_+	383	383																				[unknown]			0	0	0		PF12695	PF12695						0	6	133
contig_141326_70_373_+	373	304																				[unknown]			0	0	0		PF00651	BTB/POZ domain						0	0	61
contig_141375_1_425_+	425	425																				[unknown]			0	0	0		PF01429||_GAP_	Methyl-CpG binding domain||_GAP_						0	1	131
contig_141535_1_446_+	446	446	cyn:Cyan7425_3239	phosphatidylcholine--sterol O-acyltransferase (EC:2.3.1.43)						B8HNX9						60.27						[unknown]			0	0	0		_GAP_||PF00657	_GAP_||GDSL-like Lipase/Acylhydrolase						0	0	113
contig_141969_114_422_-	422	309																				[unknown]			0	0	0		PF08806	Sep15/SelM redox domain						0	4	424
contig_14226_482_739_+	981	258																				[unknown]			0	0	0		PF00717	Peptidase S24-like						0	227	0
contig_142670_56_418_+	418	363																				[unknown]			0	0	0		_GAP_||PF00254	_GAP_||FKBP-type peptidyl-prolyl cis-trans isomerase						0	3	54
contig_143147_29_289_+	331	261																				[unknown]			0	0	0		PF07491	Protein phosphatase inhibitor						0	1	63
contig_143359_1_434_-	434	434																				[unknown]			0	0	0		_GAP_||PF00057||_GAP_	_GAP_||Low-density lipoprotein receptor domain class A||_GAP_						0	2	53
contig_144003_1_275_-	389	275																				[unknown]			0	0	0		PF03446	NAD binding domain of 6-phosphogluconate dehydrogenase						0	18	33
contig_144376_1_438_-	438	438																				[unknown]			0	0	0		PF10390	RNA polymerase II elongation factor ELL						0	0	101
contig_14454_1_609_+	609	609																				[unknown]			0	0	0		_GAP_||PF12314	_GAP_||Inner membrane complex protein						0	70	43
contig_144929_1_356_+	356	356																				[unknown]			0	0	0		PF06682	Protein of unknown function (DUF1183)						2	0	59
contig_145715_1_316_-	316	316																				[unknown]			0	0	0		PF13582||_GAP_	PF13582||_GAP_						0	2	114
contig_145933_5_329_-	329	325																				[unknown]			0	0	0		PF09446	VMA21-like domain						2	0	122
contig_146140_1_1344_+	1703	1344																				[unknown]			0	0	0		_GAP_||PF06403||_GAP_	_GAP_||Lamprin||_GAP_						0	16	339
contig_146309_1_428_+	552	428																				[unknown]			0	0	0		_GAP_||PF00024	_GAP_||PAN domain						0	21	245
contig_146421_1_463_+	526	463																				[unknown]			0	0	0		_GAP_||PF00035||_GAP_	_GAP_||Double-stranded RNA binding motif||_GAP_						0	0	58
contig_146639_1_355_+	355	355																				[unknown]			0	0	0		_GAP_||PF08005	_GAP_||PHR domain						0	0	71
contig_147043_1_557_-	557	557																				[unknown]			0	0	0		PF00538||_GAP_	linker histone H1 and H5 family||_GAP_						0	0	175
contig_147225_1_427_+	427	427																				[unknown]			0	0	0		PF09402	Man1-Src1p-C-terminal domain						1	2	58
contig_148751_1_409_-	409	409																				[unknown]			0	0	0		PF00010||_GAP_	Helix-loop-helix DNA-binding domain||_GAP_						0	0	80
contig_149014_1_487_-	487	487																				[unknown]			0	0	0		PF12937||_GAP_	F-box-like||_GAP_						0	4	415
contig_150397_1_317_-	317	317	pti:PHATRDRAFT_46002	hypothetical protein						B7FZG9						73.08						[unknown]			0	0	0		PF04832||_GAP_	SOUL heme-binding protein||_GAP_						0	0	59
contig_151695_1_1009_+	1472	1009																				[unknown]			0	0	0		PF00435||_GAP_	Spectrin repeat||_GAP_						1	25	737
contig_15217_1_397_+	401	397																				[unknown]			0	0	0		PF00538||_GAP_	linker histone H1 and H5 family||_GAP_						0	45	12
contig_154521_160_447_-	447	288																				[unknown]			0	0	0		PF13436	PF13436						0	4	145
contig_154625_1_349_+	667	349																				[unknown]			0	0	0		PF14978	PF14978						0	0	123
contig_156595_135_339_-	339	205																				[unknown]			0	0	0		PF00505	HMG (high mobility group) box						0	7	697
contig_156847_1_207_+	343	207																				[unknown]			0	0	0		PF06624||_GAP_	Ribosome associated membrane protein RAMP4||_GAP_						1	1	696
contig_15698_1_386_+	386	386																				[unknown]			0	0	0		_GAP_||PF00538	_GAP_||linker histone H1 and H5 family						0	179	404
contig_157017_50_468_+	468	419																				[unknown]			0	0	0		_GAP_||PF08729	_GAP_||Histone promoter control 2 (HPC2)						0	5	56
contig_15871_1_280_+	327	280																				[unknown]			0	0	0		PF00436	Single-strand binding protein family						0	144	19
contig_160741_1_657_+	657	657																				[unknown]			0	0	0		PF00651||_GAP_	BTB/POZ domain||_GAP_						0	0	84
contig_162679_43_378_-	378	336																				[unknown]			0	0	0		PF15243	PF15243						0	16	305
contig_162861_124_360_-	360	237																				[unknown]			0	0	0		PF09072	Translation machinery associated TMA7						0	10	146
contig_163398_22_300_-	300	279																				[unknown]			0	0	0		PF07787||_GAP_	Protein of unknown function (DUF1625)||_GAP_						2	0	69
contig_163434_56_304_-	437	249																				[unknown]			0	0	0		PF00183	Hsp90 protein						0	0	56
contig_163474_1_378_-	378	378																				[unknown]			0	0	0		PF03020||_GAP_	LEM domain||_GAP_						0	0	54
contig_163750_1_522_+	522	522																				[unknown]			0	0	0		_GAP_||PF02958	_GAP_||Domain of unknown function (DUF227)						0	3	80
contig_16617_1_338_+	338	338																				[unknown]			0	0	0		_GAP_||PF04886	_GAP_||PT repeat						0	23	514
contig_166657_1_332_-	332	332																				[unknown]			0	0	0		_GAP_||PF08294	_GAP_||TIM21						1	2	62
contig_166713_50_265_-	330	216																				[unknown]			0	0	0		PF13436	PF13436						0	2	83
contig_167151_1_314_+	314	314																				[unknown]			0	0	0		_GAP_||PF14295	_GAP_||PF14295						0	1	49
contig_168125_1_221_+	238	221																				[unknown]			0	0	0		PF05160	DSS1/SEM1 family						0	11	147
contig_16883_26_283_+	364	258																				[unknown]			0	0	0		PF01783||_GAP_	Ribosomal L32p protein family||_GAP_						0	61	2
contig_169650_1_405_-	405	405																				[unknown]			0	0	0		PF12314	Inner membrane complex protein						0	31	25
contig_170409_1_369_+	369	369																				[unknown]			0	0	0		PF00046||_GAP_	Homeobox domain||_GAP_						0	14	55
contig_170845_1_321_-	321	321																				[unknown]			0	0	0		PF04571	lipin, N-terminal conserved region						0	5	57
contig_171078_1_201_+	201	201																				[unknown]			0	0	0		PF00183	Hsp90 protein						0	4	59
contig_171593_1_296_+	296	296																				[unknown]			0	0	0		PF08032	RNA 2'-O ribose methyltransferase substrate binding						0	0	50
contig_172157_1_637_-	637	637																				[unknown]			0	0	0		PF14838	PF14838						0	0	59
contig_172290_486_938_+	938	453																				[unknown]			0	0	0		_GAP_||PF13894	_GAP_||PF13894						0	0	55
contig_172837_1_237_+	237	237																				[unknown]			0	0	0		PF04886||_GAP_	PT repeat||_GAP_						0	1	64
contig_172850_933_1199_-	1245	267																				[unknown]			0	0	0		_GAP_||PF13450	_GAP_||PF13450						0	2	67
contig_173295_59974_60099_+	64231	126																				[unknown]			0	0	0		PF00990	GGDEF domain						0	0	115
contig_174302_711_827_+	1517	117																				[unknown]			0	0	0		PF00182	Chitinase class I						0	2	119
contig_174491_406_594_+	812	189																				[unknown]			0	0	0		PF04083	ab-hydrolase associated lipase region						0	16	98
contig_175973_1_538_-	538	538																				[unknown]			0	0	0		_GAP_||PF12901||_GAP_	_GAP_||PF12901||_GAP_						0	54	65
contig_176091_262_457_+	457	196																				[unknown]			0	0	0		PF01764	Lipase (class 3)						0	10	271
contig_176212_638_729_-	729	92																				[unknown]			0	0	0		PF01776	Ribosomal L22e protein family						0	2	91
contig_176482_1327_1569_-	1881	243																				[unknown]			0	0	0		PF00183	Hsp90 protein						0	15	46
contig_176525_987_1103_-	1104	117																				[unknown]			0	0	0		PF00056	lactate/malate dehydrogenase, NAD binding domain						0	1	153
contig_178158_1_616_+	616	616																				[unknown]			0	0	0		_GAP_||PF02201||_GAP_	_GAP_||SWIB/MDM2 domain||_GAP_						0	21	64
contig_178198_158_620_+	620	463																				[unknown]			0	0	0		_GAP_||PF04886	_GAP_||PT repeat						0	19	240
contig_179002_1_902_-	943	902																				[unknown]			0	0	0		PF00651||_GAP_	BTB/POZ domain||_GAP_						0	10	228
contig_179040_1_861_+	993	861																				[unknown]			0	0	0		_GAP_||PF01117||_GAP_	_GAP_||Aerolysin toxin||_GAP_						0	175	29869
contig_179208_25_347_-	347	323																				[unknown]			0	0	0		PF00386	C1q domain						0	13	96
contig_179314_1_274_+	274	274																				[unknown]			0	0	0		PF04749	PLAC8 family	TIGR01571	uncharacterized Cys-rich domain				1	28	387
contig_179507_1_318_-	318	318																				[unknown]			0	0	0		_GAP_||PF04832	_GAP_||SOUL heme-binding protein						0	12	94
contig_181149_1_406_+	406	406																				[unknown]			0	0	0		PF08208	DNA-directed RNA polymerase I subunit RPA34.5						0	7	70
contig_181194_1_295_+	395	295																				[unknown]			0	0	0		PF04403	Paraquat-inducible protein A						2	12	91
contig_181316_1_544_+	544	544																				[unknown]			0	0	0		_GAP_||PF05443	_GAP_||ROS/MUCR transcriptional regulator protein						0	20	76
contig_181408_1_420_-	420	420																				[unknown]			0	0	0		_GAP_||PF05225	_GAP_||helix-turn-helix, Psq domain						0	8	125
contig_181463_1143_1976_+	1977	834																				[unknown]			0	0	0		PF01660	Viral methyltransferase						0	31	872
contig_181811_1_199_+	399	199																				[unknown]			0	0	0		PF13202	EF hand						0	5	338
contig_181911_854_946_-	1587	93																				[unknown]			0	0	0		PF07465	Photosystem I protein M (PsaM)	TIGR03053	photosystem I reaction center subunit XII				1	112	2
contig_18570_347_565_-	565	219																				[unknown]			0	0	0		PF04886	PT repeat						0	23	293
contig_186333_19_228_+	228	210																				[unknown]			0	0	0		PF12937	F-box-like						0	0	62
contig_188221_124_445_-	445	322																				[unknown]			0	0	0		PF08806	Sep15/SelM redox domain						0	0	56
contig_189109_288_1040_+	1844	753																				[unknown]			0	0	0		PF07686||_GAP_	Immunoglobulin V-set domain||_GAP_						1	151	656
contig_189391_443_634_+	1060	192																				[unknown]			0	0	0		PF01391	Collagen triple helix repeat (20 copies)						0	26	85
contig_189465_1_422_+	829	422																				[unknown]			0	0	0		PF01299	Lysosome-associated membrane glycoprotein (Lamp)						1	24	2043
contig_190047_1097_1576_+	1798	480																				[unknown]			0	0	0		PF08768	Domain of unknown function (DUF1794)						0	2	48
contig_190363_719_804_+	804	86																				[unknown]			0	0	0		PF13475	PF13475						0	2	226
contig_191066_1_254_-	1728	254																				[unknown]			0	0	0		PF03646	FlaG protein						0	339	1
contig_191430_315_656_-	656	342																				[unknown]			0	0	0		PF05478||_GAP_	Prominin||_GAP_						1	4	150
contig_191693_176_858_+	858	683																				[unknown]			0	0	0		_GAP_||PF09815	_GAP_||XK-related protein						4	26	524
contig_191698_1_517_-	517	517																				[unknown]			0	0	0		PF08208	DNA-directed RNA polymerase I subunit RPA34.5						0	22	124
contig_192995_19_555_-	555	537																				[unknown]			0	0	0		PF00754	F5/8 type C domain						0	12	585
contig_193416_1_680_+	680	680																				[unknown]			0	0	0		PF00046||_GAP_	Homeobox domain||_GAP_						0	4	625
contig_193644_1_409_-	409	409																				[unknown]			0	0	0		PF02146	Sir2 family						0	1	126
contig_193791_1_469_+	578	469																				[unknown]			0	0	0		PF12901||_GAP_	PF12901||_GAP_						0	76	14
contig_194312_1_92_+	505	92																				[unknown]			0	0	0		PF01776	Ribosomal L22e protein family						0	1	128
contig_195246_158_495_-	495	338																				[unknown]			0	0	0		PF03318	Clostridium epsilon toxin ETX/Bacillus mosquitocidal toxin MTX2						0	6	110
contig_199464_1_551_-	551	551																				[unknown]			0	0	0		_GAP_||PF07716	_GAP_||Basic region leucine zipper						0	5	68
contig_20131_62_485_-	485	424																				[unknown]			0	0	0		PF11705	DNA-directed RNA polymerase III subunit Rpc31						0	4	58
contig_20241_1_308_+	356	308																				[unknown]			0	0	0		PF09495	Protein of unknown function (DUF2462)						0	6	252
contig_20251_1_343_+	343	343																				[unknown]			0	0	0		PF13908	PF13908						1	2	70
contig_21200_1_579_+	685	579																				[unknown]			0	0	0		_GAP_||PF13833	_GAP_||PF13833						0	5	102
contig_21526_1_238_+	304	238																				[unknown]			0	0	0		PF00652	Ricin-type beta-trefoil lectin domain						0	0	64
contig_21886_1_320_+	320	320																				[unknown]			0	0	0		PF08687	Apx/Shroom domain ASD2						0	0	70
contig_22638_1_564_-	564	564																				[unknown]			0	0	0		PF00651||_GAP_	BTB/POZ domain||_GAP_						0	12	99
contig_23117_1_462_+	462	462																				[unknown]			0	0	0		PF15280	PF15280						0	0	68
contig_24353_1_303_+	303	303																				[unknown]			0	0	0		PF00083	Sugar (and other) transporter						2	16	48
contig_2438_1_378_+	1183	378																				[unknown]			0	0	0		_GAP_||PF05433	_GAP_||Rickettsia 17 kDa surface antigen						1	70	0
contig_2453_510_740_+	2007	231																				[unknown]			0	0	0		PF00137	ATP synthase subunit C	TIGR01260	ATP synthase F0, C subunit				2	110	0
contig_2556_1_183_+	710	183																				[unknown]			0	0	0		PF09157	Pseudouridine synthase II TruB, C-terminal						0	78	10
contig_25807_1_482_+	489	482																				[unknown]			0	0	0		PF00096||_GAP_	Zinc finger, C2H2 type||_GAP_						0	2	79
contig_26454_1_311_+	311	311																				[unknown]			0	0	0		PF12752||_GAP_	PF12752||_GAP_						0	5	66
contig_2871_435_1061_+	1341	627																				[unknown]			0	0	0		PF13544||_GAP_	PF13544||_GAP_	TIGR02532||_GAP_	prepilin-type N-terminal cleavage/methylation domain||_GAP_				1	204	0
contig_2970_738_857_+	921	120																				[unknown]			0	0	0		PF01788	PsbJ						1	93	0
contig_35433_1_678_+	956	678	tps:THAPSDRAFT_20804	hypothetical protein						B8BQS1						78.21						[unknown]			0	0	0		_GAP_||PF02672||_GAP_	_GAP_||CP12 domain||_GAP_						1	26	1622
contig_36077_1695_1949_-	3047	255																				[unknown]			0	0	0		PF02790	Cytochrome C oxidase subunit II, transmembrane domain						1	1	179
contig_36739_1_669_+	669	669																				[unknown]			0	0	0		PF02696	Uncharacterized ACR, YdiU/UPF0061 family						0	6	106
contig_38029_2031_2225_+	2253	195																				[unknown]			0	0	0		PF00627	UBA/TS-N domain						0	3	49
contig_38674_1_713_-	713	713																				[unknown]			0	0	0		_GAP_||PF02958	_GAP_||Domain of unknown function (DUF227)						0	5	133
contig_38758_171_1022_+	1054	852	bth:BT_3775	hypothetical protein						Q8A191						71.72						[unknown]			0	0	0		_GAP_||PF04488||_GAP_	_GAP_||Glycosyltransferase sugar-binding region containing DXD motif ||_GAP_						1	18	211
contig_39580_1_775_+	784	775																				[unknown]			0	0	0		_GAP_||PF07557||_GAP_	_GAP_||Shugoshin C terminus||_GAP_						0	0	93
contig_39960_1_1030_+	1863	1030																				[unknown]			0	0	0		PF02037||_GAP_	SAP domain||_GAP_						0	4	326
contig_41198_1_863_+	863	863																				[unknown]			0	0	0		_GAP_||PF00079||_GAP_	_GAP_||Serpin (serine protease inhibitor)||_GAP_						0	6	146
contig_41436_13_658_-	658	646																				[unknown]			0	0	0		_GAP_||PF15341	_GAP_||PF15341						0	8	206
contig_4228_111_368_+	381	258																				[unknown]			0	0	0		PF01783||_GAP_	Ribosomal L32p protein family||_GAP_	TIGR01031||_GAP_	ribosomal protein L32||_GAP_				0	60	0
contig_4295_560_822_+	822	263																				[unknown]			0	0	0		PF05130	FlgN protein						0	86	3
contig_43406_1_563_+	563	563																				[unknown]			0	0	0		PF00041||_GAP_	Fibronectin type III domain||_GAP_						1	0	55
contig_46180_1_782_-	782	782																				[unknown]			0	0	0		_GAP_||PF12756	_GAP_||PF12756						0	2	88
contig_46418_205_529_-	529	325																				[unknown]			0	0	0		PF00651||_GAP_	BTB/POZ domain||_GAP_						0	6	64
contig_46430_160_573_+	690	414																				[unknown]			0	0	0		_GAP_||PF09813	_GAP_||Coiled-coil domain-containing protein 56						1	0	132
contig_46509_213_411_-	411	199																				[unknown]			0	0	0		PF13202	EF hand						0	4	343
contig_47887_1_471_+	498	471																				[unknown]			0	0	0		PF00013||_GAP_	KH domain||_GAP_						0	2	51
contig_48715_1_626_-	626	626																				[unknown]			0	0	0		PF09815||_GAP_	XK-related protein||_GAP_						3	0	136
contig_50100_1_645_+	686	645																				[unknown]			0	0	0		PF10409||_GAP_	C2 domain of PTEN tumour-suppressor protein||_GAP_						0	2	103
contig_50612_77_303_-	303	227																				[unknown]			0	0	0		PF10242	Lipoma HMGIC fusion partner-like protein						1	0	81
contig_52215_1_388_+	388	388																				[unknown]			0	0	0		_GAP_||PF14704	_GAP_||PF14704						0	8	143
contig_53346_30_458_+	458	429									KOG0749	Mitochondrial ADP/ATP carrier proteins	Energy production and conversion	METABOLISM		70						[unknown]			0	0	0		PF00153||_GAP_	Mitochondrial carrier protein||_GAP_			MC		2	0	3	129
contig_53441_115_678_+	678	564																				[unknown]			0	0	0		PF01064||_GAP_	Activin types I and II receptor domain||_GAP_						1	6	176
contig_54118_1_390_-	390	390																				[unknown]			0	0	0		_GAP_||PF13499	_GAP_||EF-hand domain pair						0	3	139
contig_54173_1_438_+	438	438																				[unknown]			0	0	0		PF00651||_GAP_	BTB/POZ domain||_GAP_						0	3	94
contig_54617_63_455_+	456	393																				[unknown]			0	0	0		PF06374	NADH-ubiquinone oxidoreductase subunit b14.5b (NDUFC2)						2	6	247
contig_55767_1_406_-	546	406																				[unknown]			0	0	0		PF00361	NADH-Ubiquinone/plastoquinone (complex I), various chains						3	1	89
contig_56157_142_354_-	504	213														92.75						[unknown]			0	0	0		PF06624	Ribosome associated membrane protein RAMP4						1	1	50
contig_56787_1_411_+	411	411														49.26						[unknown]			0	0	0		_GAP_||PF00005	_GAP_||ABC transporter						0	0	68
contig_56846_1_471_+	471	471																				[unknown]			0	0	0		PF01429||_GAP_	Methyl-CpG binding domain||_GAP_						0	6	59
contig_57885_1_523_-	578	523																				[unknown]			0	0	0		PF07741||_GAP_	Brf1-like TBP-binding domain||_GAP_						0	0	77
contig_57929_1_450_+	450	450																				[unknown]			0	0	0		_GAP_||PF02806	_GAP_||Alpha amylase, C-terminal all-beta domain						0	0	68
contig_59001_1_515_-	564	515																				[unknown]			0	0	0		_GAP_||PF00651||_GAP_	_GAP_||BTB/POZ domain||_GAP_						0	0	99
contig_59079_1_287_+	338	287																				[unknown]			0	0	0		PF05160	DSS1/SEM1 family						0	3	53
contig_60075_1_545_-	545	545	lbz:LbrM35_V2.7330	delta8 fatty acid desaturase-like protein						A4HQL7	KOG4232	Delta 6-fatty acid desaturase/delta-8 sphingolipid desaturase	Lipid transport and metabolism	METABOLISM		47.22						[unknown]			0	0	0		PF00487	Fatty acid desaturase						2	0	312
contig_61831_21_402_-	402	382																				[unknown]			0	0	0		PF10017	Uncharacterized conserved protein (DUF2260)						0	12	50
contig_62224_1_549_-	549	549																				[unknown]			0	0	0		PF03145	Seven in absentia protein family						0	2	71
contig_63219_1_397_+	408	397																				[unknown]			0	0	0		_GAP_||PF09813	_GAP_||Coiled-coil domain-containing protein 56						1	5	52
contig_63853_83_506_-	506	424																				[unknown]			0	0	0		PF09011||_GAP_	Domain of unknown function (DUF1898)||_GAP_						0	1	137
contig_64546_1_415_+	415	415																				[unknown]			0	0	0		PF13894||_GAP_	PF13894||_GAP_						0	2	67
contig_64842_1_301_-	301	301																				[unknown]			0	0	0		PF09394||_GAP_	Chagasin family peptidase inhibitor I42||_GAP_						0	3	99
contig_65279_1_431_+	431	431																				[unknown]			0	0	0		PF02173||_GAP_	pKID domain||_GAP_						0	11	68
contig_66941_169_525_-	525	357																				[unknown]			0	0	0		PF03826||_GAP_	OAR domain||_GAP_						0	1	74
contig_66977_9_368_-	368	360																				[unknown]			0	0	0		_GAP_||PF01565	_GAP_||FAD binding domain						1	0	51
contig_67070_1_325_+	325	325																				[unknown]			0	0	0		PF12937||_GAP_	F-box-like||_GAP_						0	0	54
contig_67494_1_489_+	495	489																				[unknown]			0	0	0		PF00651||_GAP_	BTB/POZ domain||_GAP_						0	0	67
contig_68634_1_382_-	382	382																				[unknown]			0	0	0		PF03999	Microtubule associated protein (MAP65/ASE1 family)						0	0	72
contig_68659_122_343_+	343	222																				[unknown]			0	0	0		PF08555	Eukaryotic family of unknown function (DUF1754)						0	10	43
contig_68683_1_428_-	520	428																				[unknown]			0	0	0		PF00096	Zinc finger, C2H2 type						0	2	100
contig_69463_187_459_-	459	273																				[unknown]			0	0	0		PF14978	PF14978						0	0	59
contig_71086_1_338_+	338	338																				[unknown]			0	0	0		PF04500	FLYWCH zinc finger domain						0	7	65
contig_76550_240_459_-	459	220																				[unknown]			0	0	0		PF12400||_GAP_	Vaculolar membrane protein ||_GAP_						1	0	63
contig_79239_1_641_+	713	641																				[unknown]			0	0	0		_GAP_||PF00652	_GAP_||Ricin-type beta-trefoil lectin domain						0	0	70
contig_79_16_282_+	300	267																				[unknown]			0	0	0		PF00137	ATP synthase subunit C						2	99	0
contig_80751_1_431_-	431	431																				[unknown]			0	0	0		PF00520||_GAP_	Ion transport protein||_GAP_						2	0	238
contig_81939_1_455_-	479	455																				[unknown]			0	0	0		_GAP_||PF00651	_GAP_||BTB/POZ domain						0	0	64
contig_82512_40_400_-	400	361																				[unknown]			0	0	0		PF15377	PF15377						0	16	154
contig_83367_1_316_-	316	316																				[unknown]			0	0	0		PF13015	PF13015						0	0	56
contig_88994_1_376_-	376	376	cre:CHLREDRAFT_196520	ANT1; adenine nucleotide translocator; K05863 solute carrier family 25 (mitochondrial carrier; adenine nucleotide translocator)		K05863	solute carrier family 25 (mitochondrial adenine nucleotide translocator), member 4/5/6/31	Calcium signaling pathway || cGMP-PKG signaling pathway || Parkinson's disease || Huntington's disease || HTLV-I infection		P27080||A8J1B6	KOG0749	Mitochondrial ADP/ATP carrier proteins	Energy production and conversion	METABOLISM		79.83						[unknown]			0	0	0		PF00153	Mitochondrial carrier protein			MC		2	2	0	59
contig_92170_1_337_-	337	337																				[unknown]			0	0	0		PF10192	Rhodopsin-like GPCR transmembrane domain						2	0	66
contig_92747_1_343_-	343	343																				[unknown]			0	0	0		PF13833||_GAP_	PF13833||_GAP_						0	7	53
contig_92790_26_509_-	509	484																				[unknown]			0	0	0		PF12254||_GAP_	DNA polymerase alpha subunit p180 N terminal||_GAP_						0	0	51
contig_94292_54_363_+	363	310																				[unknown]			0	0	0		PF00226	DnaJ domain						0	5	152
contig_9437_103_384_+	384	282																				[unknown]			0	0	0		PF03896	Translocon-associated protein (TRAP), alpha subunit						1	11	110
contig_96158_1_490_-	490	490																				[unknown]			0	0	0		PF10409	C2 domain of PTEN tumour-suppressor protein						0	17	77
contig_97046_1_336_-	336	336																				[unknown]			0	0	0		PF06391||_GAP_	CDK-activating kinase assembly factor MAT1||_GAP_						0	0	73
contig_97468_36_466_-	466	431																				[unknown]			0	0	0		PF10183||_GAP_	ESSS subunit of NADH:ubiquinone oxidoreductase (complex I) ||_GAP_						1	2	206
contig_98582_1_417_-	522	417																				[unknown]			0	0	0		_GAP_||PF08729	_GAP_||Histone promoter control 2 (HPC2)						0	0	76
contig_98807_1_247_+	306	247																				[unknown]			0	0	0		_GAP_||PF12874	_GAP_||PF12874						0	2	101
contig_1002_1_597_+	597	597	atu:Atu0145	gltB; glutamate synthase large subunit; K00265 glutamate synthase (NADPH/NADH) large chain [EC:1.4.1.13 1.4.1.14]	atu01120||atu01110||atu00910||atu00250||atu01100	K00265	glutamate synthase (NADPH/NADH) large chain [EC:1.4.1.13 1.4.1.14]	Alanine, aspartate and glutamate metabolism || Nitrogen metabolism || Biosynthesis of amino acids	1.4.1.13||1.4.1.14	Q7D240					gi493353318-NZ_AECL01000004	74.24	glutamate synthase large subunit		Agrobacterium ATCC 31749	82789	Bacteria	Alphaproteobacteria	50822	131	0.7677	6	6	Bacteria;Proteobacteria;Alphaproteobacteria;Rhizobiales;Rhizobiaceae;Agrobacterium;Agrobacterium ATCC 31749	PF00310||_GAP_	Glutamine amidotransferases class-II||_GAP_						0	60	0
contig_10817_1_366_-	540	366	jan:Jann_3833	2-keto-3-deoxygalactonate kinase (EC:2.7.1.58); K00883 2-dehydro-3-deoxygalactonokinase [EC:2.7.1.58]	jan00052	K00883	2-dehydro-3-deoxygalactonokinase [EC:2.7.1.58]	Galactose metabolism	2.7.1.58	Q28KL2					gi498127370-NZ_AEYW01000012	60	2-keto-3-deoxy-galactonokinase		Ruegeria TW15	981384	Bacteria	Alphaproteobacteria	50822	131	0.7719	7	7	Bacteria;Proteobacteria;Alphaproteobacteria;Rhodobacterales;Rhodobacteraceae;Jannaschia;Jannaschia CCS1	PF05035	2-keto-3-deoxy-galactonokinase						0	50	0
contig_108275_62915_63181_+	114021	267													YU9DRAFT_01447-YU9DRAFT_scaffold_162.163	37.68	hypothetical protein		Bradyrhizobium japonicum WSM1743	1038865	Bacteria	Alphaproteobacteria	50822	131	1	1	1	Bacteria;Proteobacteria;Alphaproteobacteria;Rhizobiales;Bradyrhizobiaceae;Bradyrhizobium;Bradyrhizobium japonicum WSM1743								0	0	423
contig_108679_250_1029_+	1612	780													gi86137520-NZ_AANB01000003	36.14	mucin-associated surface protein	CAM_CRCL_4233839	Roseobacter MED193	314262	Bacteria	Alphaproteobacteria	50822	131	1	1	1	Bacteria;Proteobacteria;Alphaproteobacteria;Rhodobacterales;Rhodobacteraceae;Roseobacter;Roseobacter MED193								0	39	195
contig_109719_195_902_-	902	708													HIMB59_00004280-NC_018644	64.38	Bacteriorhodopsin-like protein		alpha proteobacterium HIMB59	744985	Bacteria	Alphaproteobacteria	50822	131	0.5018	9	9	Bacteria;Proteobacteria;Alphaproteobacteria;Misc. Alphaproteobacteria;Environmental Alphaproteobacteria;Uncultured Alphaproteobacteria;Rhodobacterales bacterium HTCC2255	PF01036	Bacteriorhodopsin-like protein						5	99	1242
contig_111847_1_638_+	638	638	wri:WRi_002820	hypothetical protein						C0R5R0					CAMPEP_0117020654-CAMNT_0004725931	29.53			Tiarina fusa	693140	Bacteria	Alphaproteobacteria	50822	131	0.4862	4	4	Bacteria;Proteobacteria;Alphaproteobacteria;Rickettsiales;Anaplasmataceae;Wolbachia;Wolbachia endosymbiont of Drosophila ananassae								0	4	87
contig_1122_99_372_+	372	274	swi:Swit_1077	TonB-dependent receptor, plug						A5V577					Swit_1077-NC_009511	56.52	TonB-dependent receptor, plug	CAM_CRCL_4010247	Sphingomonas wittichii RW1	392499	Bacteria	Alphaproteobacteria	50822	131	0.7747	5	5	Bacteria;Proteobacteria;Alphaproteobacteria;Sphingomonadales;Sphingomonadaceae;Novosphingobium;Novosphingobium aromaticivorans DSM 12444								0	155	2
contig_120560_53_625_+	732	573													TH2_06438-GCA_000300275.1_contig2	58.64	isochorismatase hydrolase		Thalassospira profundimaris WP0211	1177928	Bacteria	Alphaproteobacteria	50822	131	0.8535	2	2	Bacteria;Proteobacteria;Alphaproteobacteria;Rhizobiales;Methylobacteriaceae;Microvirga;Microvirga WSM3557	PF00857	Isochorismatase family						0	0	219
contig_121935_1_1063_+	1160	1063	bja:bll3912	hypothetical protein						Q89ND0					A176_2331-GCA_000280925.1_contig20	38.51	Beta-lactamase		Myxococcus (contaminant ex DSM 436)	1297742	Bacteria	Alphaproteobacteria	50822	131	0.8481	7	7	Bacteria;Proteobacteria;Alphaproteobacteria;Rhizobiales;Bradyrhizobiaceae;Bradyrhizobium;Bradyrhizobium Cp5.3	PF00144||_GAP_	Beta-lactamase||_GAP_						0	8	311
contig_122398_1_683_+	683	683													OA238_c06480-NC_020908	55.51	hypothetical protein	CAM_CRCL_6866	Octadecabacter arcticus 238	391616	Bacteria	Alphaproteobacteria	50822	131	0.8925	9	9	Bacteria;Proteobacteria;Alphaproteobacteria;Rhodobacterales;Rhodobacteraceae;Octadecabacter;Octadecabacter antarcticus 307	PF00266	Aminotransferase class-V						0	0	117
contig_122708_1_565_+	565	565	ara:Arad_8419	gluconolactonase protein; K01053 gluconolactonase [EC:3.1.1.17]	ara01110||ara00053||ara01120||ara01100||ara00930||ara00030	K01053	gluconolactonase [EC:3.1.1.17]	Pentose phosphate pathway || Ascorbate and aldarate metabolism || Caprolactam degradation || Carbon metabolism || Degradation of aromatic compounds	3.1.1.17	B9JIF8					Arad_8419-NC_011983	48.15	gluconolactonase protein; K01053 gluconolactonase [EC:3.1.1.17]	CAM_CRCL_14090719	Agrobacterium radiobacter K84	311403	Bacteria	Alphaproteobacteria	50822	131	0.8239	21	21	Bacteria;Proteobacteria;Alphaproteobacteria;Rhizobiales;Phyllobacteriaceae;Mesorhizobium;Mesorhizobium WSM3224	_GAP_||PF08450	_GAP_||SMP-30/Gluconolaconase/LRE-like region						0	133	192
contig_123802_1_788_-	788	788													gi118593078-NZ_AAUW01000024	33.12	Tat pathway signal sequence domain protein	CAM_CRCL_32131994	Labrenzia aggregata IAM 12614	384765	Bacteria	Alphaproteobacteria	50822	131	1	1	1	Bacteria;Proteobacteria;Alphaproteobacteria;Rhodobacterales;Rhodobacteraceae;Labrenzia;Labrenzia aggregata IAM 12614								0	9	887
contig_125178_25_340_+	340	316													DICPUDRAFT_93172-dpp1296	77	S-adenosyl-L-homocysteine hydrolase		Dictyostelium purpureum	5786	Bacteria	Alphaproteobacteria	50822	131	0.3745	66	63	Bacteria;Proteobacteria;Alphaproteobacteria;Rhizobiales;Brucellaceae;Brucella;Brucella NF 2653	PF05221	S-adenosyl-L-homocysteine hydrolase						0	0	52
contig_125684_949_1407_-	1498	459													BraelDRAFT_3902-BraelDRAFT_scaffold2.2	38.51	Threonine dehydrogenase and related Zn-dependent dehydrogenases		Bradyrhizobium elkanii USDA 76	398525	Bacteria	Alphaproteobacteria	50822	131	0.9725	2	2	Bacteria;Proteobacteria;Alphaproteobacteria;Rhizobiales;Bradyrhizobiaceae;Bradyrhizobium;Bradyrhizobium elkanii USDA 76	_GAP_||PF08240	_GAP_||Alcohol dehydrogenase GroES-like domain						0	3	248
contig_125978_187_912_-	1079	726	pfa:PF11_0258	co-chaperone GrpE, putative; K03687 molecular chaperone GrpE		K03687	molecular chaperone GrpE			Q8IIB6					CAMPEP_0184599240-CAMNT_0027007849	49.32			Chromerida RM11	348535	Bacteria	Alphaproteobacteria	50822	131	0.516	20	19	Bacteria;Proteobacteria;Alphaproteobacteria;Rhizobiales;Brucellaceae;Brucella;Brucella BO2	_GAP_||PF01025	_GAP_||GrpE						0	1	177
contig_127873_1_323_+	323	323	ara:Arad_9031	adenylate/guanylate cyclase protein						B9JJS0					Arad_9031-NC_011983	37.88	adenylate/guanylate cyclase protein	CAM_CRCL_14219375	Agrobacterium radiobacter K84	311403	Bacteria	Alphaproteobacteria	50822	131	1	1	1	Bacteria;Proteobacteria;Alphaproteobacteria;Rhizobiales;Rhizobiaceae;Agrobacterium;Agrobacterium radiobacter K84	_GAP_||PF00536	_GAP_||SAM domain (Sterile alpha motif)						0	3	73
contig_1287_1_523_+	576	523													ORF0296-A536G10DRAFT_NOD	68.24	IMG gene_oid=2236275349		alpha proteobacterium SCGC AAA536-G10	1009708	Bacteria	Alphaproteobacteria	50822	131	0.7619	3	3	Bacteria;Proteobacteria;Alphaproteobacteria;Misc. Alphaproteobacteria;Environmental Alphaproteobacteria;Uncultured Alphaproteobacteria;alpha proteobacterium SCGC AAA536-G10	PF00528	Binding-protein-dependent transport system inner membrane component						4	54	0
contig_129031_1_373_-	373	373	bja:blr2534	sohB; proteinase						Q89S71					CAMPEP_0182537304-CAMNT_0024747661	45.1			Florenciella parvula RCC1693	-311202	Bacteria	Alphaproteobacteria	50822	131	0.7146	9	9	Bacteria;Proteobacteria;Alphaproteobacteria;Rhizobiales;Bradyrhizobiaceae;Bradyrhizobium;Bradyrhizobium Cp5.3	PF01343	Peptidase family S49						0	1	49
contig_130758_1_502_+	502	502	sit:TM1040_2326	beta-Ig-H3/fasciclin						Q1GE58					TM1040_2326-NC_008044	53.38	beta-Ig-H3/fasciclin	CAM_CRCL_31631879	Ruegeria TM1040	292414	Bacteria	Alphaproteobacteria	50822	131	0.4229	12	11	Bacteria;Proteobacteria;Alphaproteobacteria;Rhodobacterales;Rhodobacteraceae;Nautella;Nautella italica	_GAP_||PF02469	_GAP_||Fasciclin domain						0	5	195
contig_132121_1_393_+	456	393													B025DRAFT_03139-B025DRAFT_scaffold_56.57	43.22	Gluconolactonase		Burkholderia JPY347	667632	Bacteria	Alphaproteobacteria	50822	131	0.8014	41	41	Bacteria;Proteobacteria;Alphaproteobacteria;Rhizobiales;Rhizobiaceae;Rhizobium;Rhizobium etli CIAT 894	PF08450	SMP-30/Gluconolaconase/LRE-like region						0	17	99
contig_133502_35_325_-	738	291	apb:SAR116_2068	hypothetical protein						D5BNB7					TH2_12557-GCA_000300275.1_contig6	56.04	hypothetical protein		Thalassospira profundimaris WP0211	1177928	Bacteria	Alphaproteobacteria	50822	131	1	1	1	Bacteria;Proteobacteria;Alphaproteobacteria;Rhodospirillales;Rhodospirillaceae;Thalassospira;Thalassospira profundimaris WP0211	PF04134	Protein of unknown function, DUF393						1	0	76
contig_13486_33_902_-	1061	870	pgv:SL003B_2254	ABC transporter		K02058	simple sugar transport system substrate-binding protein								SL003B_2254-NC_015259	69.1	ABC transporter; K02058 simple sugar transport system substrate-binding protein	CAM_CRCL_11806	Polymorphum gilvum SL003B-26A1	991905	Bacteria	Alphaproteobacteria	50822	131	0.8403	48	48	Bacteria;Proteobacteria;Alphaproteobacteria;Rhizobiales;Rhizobiaceae;Ensifer;Ensifer USDA 6670	PF02608||_GAP_	Basic membrane protein||_GAP_			ABC (binding protein)	sugar	2	0	237	5
contig_135106_1_469_+	469	469	mmr:Mmar10_2060	50S ribosomal protein L11P methyltransferase (EC:2.1.1.-); K02687 ribosomal protein L11 methyltransferase [EC:2.1.1.-]		K02687	ribosomal protein L11 methyltransferase [EC:2.1.1.-]			Q0AMY5					Mmar10_2060-NC_008347	32.53	50S ribosomal protein L11P methyltransferase (EC:2.1.1.-); K02687 ribosomal protein L11 methyltransferase [EC:2.1.1.-]	CAM_CRCL_24095	Maricaulis maris MCS10	394221	Bacteria	Alphaproteobacteria	50822	131	1	1	1	Bacteria;Proteobacteria;Alphaproteobacteria;Caulobacterales;Hyphomonadaceae;Maricaulis;Maricaulis maris MCS10								0	0	74
contig_13605_1178_2122_-	2390	945	dsh:Dshi_0808	mipA; MltA-interacting MipA family protein; K07274 outer membrane protein		K07274	outer membrane protein			A8LR10					Dshi_0808-NC_009952	26.82	mipA; MltA-interacting MipA family protein; K07274 outer membrane protein	CAM_CRCL_4044592	Dinoroseobacter shibae DFL 12 = DSM 16493	398580	Bacteria	Alphaproteobacteria	50822	131	1	1	1	Bacteria;Proteobacteria;Alphaproteobacteria;Rhodobacterales;Rhodobacteraceae;Dinoroseobacter;Dinoroseobacter shibae DFL 12 = DSM 16493	_GAP_||PF06629	_GAP_||MltA-interacting protein MipA						0	447	15
contig_13622_448_1008_+	1725	561													OAN307_c10950-NC_020911	68.13	cbbY1; protein CbbY	CAM_CRCL_5026	Octadecabacter antarcticus 307	391626	Bacteria	Alphaproteobacteria	50822	131	1	2	1	Bacteria;Proteobacteria;Alphaproteobacteria;Rhodobacterales;Rhodobacteraceae;Octadecabacter;Octadecabacter antarcticus 307	PF13419	PF13419	_GAP_||TIGR01509	_GAP_||HAD hydrolase, family IA, variant 3				0	87	0
contig_13626_1576_2154_+	4775	579	rfr:Rfer_3918	glucose-methanol-choline oxidoreductase; K00108 choline dehydrogenase [EC:1.1.99.1]	rfr00260	K00108	choline dehydrogenase [EC:1.1.99.1]	Glycine, serine and threonine metabolism	1.1.99.1	Q21RI6					RhiBR816DRAFT_4472-scaffold3	72.85	Choline dehydrogenase and related flavoproteins		Rhizobium BR816	48291	Bacteria	Alphaproteobacteria	50822	131	0.688	20	20	Bacteria;Proteobacteria;Alphaproteobacteria;Rhizobiales;Rhizobiaceae;Rhizobium;Rhizobium BR816	PF00732||_GAP_	GMC oxidoreductase||_GAP_						1	228	0
contig_13646_257_796_+	2533	540	apb:SAR116_0826	flagellar basal body-associated protein FliL (EC:1.1.1.22); K02415 flagellar FliL protein		K02415	flagellar FliL protein			D5BS22					HIMB100_00015090-GCA_000238815.2_contig10	39.6	flagellar basal body-associated protein		SAR116 cluster alpha proteobacterium HIMB100	909943	Bacteria	Alphaproteobacteria	50822	131	0.7893	2	2	Bacteria;Proteobacteria;Alphaproteobacteria;SAR116;SAR116_X;SAR116_XX;SAR116 cluster alpha proteobacterium HIMB100	_GAP_||PF03748	_GAP_||Flagellar basal body-associated protein FliL						1	119	0
contig_1366_1_624_+	659	624	apb:SAR116_1570	catalase (EC:1.11.1.6); K03782 catalase/peroxidase [EC:1.11.1.6 1.11.1.7]	apb00360||apb01120||apb01110||apb00680||apb01100||apb00380	K03782	catalase-peroxidase [EC:1.11.1.21]	Phenylalanine metabolism || Tryptophan metabolism || Phenylpropanoid biosynthesis	1.11.1.6||1.11.1.7	D5BU66					B273_1067-GCA_000307935.1_ctg6	73.89	catalase/peroxidase HPI		SAR86 cluster bacterium SAR86E	1208365	Bacteria	Alphaproteobacteria	50822	131	0.5262	3	3	Bacteria;Proteobacteria;Alphaproteobacteria;SAR116;SAR116_X;SAR116_XX;Puniceispirillum marinum IMCC1322	PF00141	Peroxidase						0	73	14
contig_13756_1_1022_+	1277	1022													PJE062_4022-NZ_DS996816	81.88	ABC transporter, substrate-binding protein, family 1	CAM_CRCL_11170	Pseudovibrio JE062	439495	Bacteria	Alphaproteobacteria	50822	131	0.8007	8	8	Bacteria;Proteobacteria;Alphaproteobacteria;Rhodospirillales;Rhodospirillaceae;Thalassospira;Thalassospira profundimaris WP0211	_GAP_||PF13416	_GAP_||PF13416						0	231	0
contig_13760_1_947_+	973	947	sil:SPOA0381	spermidine/putrescine ABC transporter, periplasmic substrate-binding protein; K02055 putative spermidine/putrescine transport system substrate-binding protein		K02055	putative spermidine/putrescine transport system substrate-binding protein			Q5LKK0					gi83950187-NZ_AALY01000001	74.84	spermidine/putrescine ABC transporter, periplasmic substrate-binding protein	CAM_CRCL_34128649	Roseovarius nubinhibens ISM	89187	Bacteria	Alphaproteobacteria	50822	131	0.9302	5	5	Bacteria;Proteobacteria;Alphaproteobacteria;Rhodobacterales;Rhodobacteraceae;Roseovarius;Roseovarius 217	PF13416||_GAP_	PF13416||_GAP_			ABC (binding protein)	spermidine/putrescine	2	0	153	14
contig_13797_1189_1815_+	2526	627	sit:TM1040_3462	amidohydrolase 3; K07047		K07047				Q1GLN2					ADG881_1708-NZ_DS989915	63.24	Amidohydrolase family	CAM_CRCL_4000737	Alcanivorax DG881	236097	Bacteria	Alphaproteobacteria	50822	131	0.8411	3	3	Bacteria;Proteobacteria;Alphaproteobacteria;Rhodobacterales;Rhodobacteraceae;Ruegeria;Ruegeria TM1040	PF07969||_GAP_	Amidohydrolase family||_GAP_						0	879	15
contig_13863_610_1013_-	1014	404	jan:Jann_2374	short-chain dehydrogenase/reductase SDR						Q28PS1					gi126727006-NZ_AAXZ01000006	86.82	oxidoreductase, short chain dehydrogenase/reductase family	CAM_CRCL_4058	Rhodobacteraceae bacterium HTCC2150	388401	Bacteria	Alphaproteobacteria	50822	131	0.9725	2	2	Bacteria;Proteobacteria;Alphaproteobacteria;Rhodobacterales;Rhodobacteraceae;Rhodobacteraceae bacterium;Rhodobacteraceae bacterium HTCC2083	PF13561	PF13561						0	63	2
contig_13924_1_454_-	974	454													GPB2148_3872-NZ_DS999223	51.56	peptidase, M28 family	CAM_CRCL_4002633	Marine gamma proteobacterium HTCC2148	247634	Bacteria	Alphaproteobacteria	50822	131	0.6937	5	5	Bacteria;Proteobacteria;Alphaproteobacteria;Sphingomonadales;Sphingomonadaceae;Sphingomonas;Sphingomonas MM-1								0	77	0
contig_13942_267_762_-	762	496													wNo_11300-NC_021084	36.47	repeat domain and putative OTU-like cysteine protease		Wolbachia endosymbiont of Drosophila simulans wNo	1236908	Bacteria	Alphaproteobacteria	50822	131	1	1	1	Bacteria;Proteobacteria;Alphaproteobacteria;Rickettsiales;Anaplasmataceae;Wolbachia;Wolbachia endosymbiont of Drosophila simulans wNo	PF12796||PF13857	PF12796||PF13857						0	79	0
contig_139714_1_392_+	392	392	pub:SAR11_0063	pilMN; type II secretion; K02662 type IV pilus assembly protein PilM; K02663 type IV pilus assembly protein PilN		K02663||K02662				Q4FPL4					SAR11_0063-NC_007205	25	pilMN; type II secretion; K02662 type IV pilus assembly protein PilM; K02663 type IV pilus assembly protein PilN	CAM_CRCL_32870336	Pelagibacter ubique HTCC1062	335992	Bacteria	Alphaproteobacteria	50822	131	0.9725	2	2	Bacteria;Proteobacteria;Alphaproteobacteria;SAR11 clade;Surface 1;Pelagibacter;Pelagibacter ubique HTCC1002								0	10	45
contig_13987_414_1022_+	1426	609	ccr:CC_2569 || ccs:CCNA_02652	monooxygenase flavin-binding family protein || cyclohexanone monooxygenase (EC:1.14.13.22)						B8H0A9					CCNA_02652-NC_011916	62	cyclohexanone monooxygenase (EC:1.14.13.22)	CAM_CRCL_23386	Caulobacter crescentus NA1000	565050	Bacteria	Alphaproteobacteria	50822	131	0.7709	6	6	Bacteria;Proteobacteria;Alphaproteobacteria;Caulobacterales;Caulobacteraceae;Caulobacter;Caulobacter K31	PF13738	PF13738						0	100	2
contig_14032_1_597_+	597	597													gi90415314-NZ_AAPI01000001	55.12	flagellar P-ring protein FlgI	CAM_CRCL_33048972	gamma proteobacterium HTCC2207	314287	Bacteria	Alphaproteobacteria	50822	131	0.7893	2	2	Bacteria;Proteobacteria;Alphaproteobacteria;Rhodobacterales;Rhodobacteraceae;Octadecabacter;Octadecabacter antarcticus 307	PF02119	Flagellar P-ring protein						0	82	3
contig_14042_1_641_+	682	641	mci:Mesci_6254	extracellular solute-binding protein family 3						E8TPL3					Mesci_6254-NC_014918	62.74	extracellular solute-binding protein family 3	CAM_CRCL_21802	Mesorhizobium ciceri biovar biserrulae WSM1271	765698	Bacteria	Alphaproteobacteria	50822	131	0.8922	7	7	Bacteria;Proteobacteria;Alphaproteobacteria;Rhizobiales;Phyllobacteriaceae;Mesorhizobium;Mesorhizobium australicum WSM2073	PF00497	Bacterial extracellular solute-binding proteins, family 3						0	52	2
contig_14043_1_1005_+	1006	1005	swi:Swit_1268	flagellar basal body FlaE domain-containing protein; K02390 flagellar hook protein FlgE	swi02040	K02390	flagellar hook protein FlgE	Flagellar assembly		A5V5R7					Swit_1268-NC_009511	39.07	flagellar basal body FlaE domain-containing protein; K02390 flagellar hook protein FlgE	CAM_CRCL_34043	Sphingomonas wittichii RW1	392499	Bacteria	Alphaproteobacteria	50822	131	0.7893	2	2	Bacteria;Proteobacteria;Alphaproteobacteria;Sphingomonadales;Sphingomonadaceae;Sphingomonas;Sphingomonas wittichii RW1	_GAP_||PF07559||_GAP_	_GAP_||Flagellar basal body protein FlaE||_GAP_	TIGR03506	fagellar hook-basal body proteins				0	330	24
contig_14065_1_649_+	703	649	mop:Mesop_2524	Extracellular ligand-binding receptor; K01999 branched-chain amino acid transport system substrate-binding protein	mop02010	K01999	branched-chain amino acid transport system substrate-binding protein	ABC transporters							Mesop_2524-NC_015675	57.75	Extracellular ligand-binding receptor; K01999 branched-chain amino acid transport system substrate-binding protein	CAM_CRCL_13635	Mesorhizobium opportunistum WSM2075	536019	Bacteria	Alphaproteobacteria	50822	131	0.9541	6	6	Bacteria;Proteobacteria;Alphaproteobacteria;Rhizobiales;Phyllobacteriaceae;Mesorhizobium;Mesorhizobium australicum WSM2073	PF13458	PF13458						0	74	0
contig_14072_486_990_-	990	505	mno:Mnod_3330	putative transcriptional regulator						B8IL65					Mnod_3330-NC_011894	58.79	putative transcriptional regulator	CAM_CRCL_33497370	Methylobacterium nodulans ORS 2060	460265	Bacteria	Alphaproteobacteria	50822	131	0.8698	5	5	Bacteria;Proteobacteria;Alphaproteobacteria;Rhizobiales;Methylobacteriaceae;Methylobacterium;Methylobacterium 4-46								0	313	26
contig_14081_1_774_+	774	774	rde:RD1_1838	D-cysteine desulfhydrase (EC:4.4.1.15); K05396 D-cysteine desulfhydrase [EC:4.4.1.15]	rde00270	K05396	D-cysteine desulfhydrase [EC:4.4.1.15]	Cysteine and methionine metabolism	4.4.1.15	Q168Z0					gi126726786-NZ_AAXZ01000004	53.06	pyridoxal phosphate-dependent enzymes, D-cysteine desulfhydrase family	CAM_CRCL_4874	Rhodobacteraceae bacterium HTCC2150	388401	Bacteria	Alphaproteobacteria	50822	131	0.6642	14	14	Bacteria;Proteobacteria;Alphaproteobacteria;Rhodobacterales;Rhodobacteraceae;Roseobacter;Roseobacter CCS2	PF00291	Pyridoxal-phosphate dependent enzyme						0	68	0
contig_14145_1064_1342_+	1374	279	apb:SAR116_0041	family 1 extracellular solute-binding protein (EC:2.1.2.11)						D5BNL7					gi114769494-NZ_AATR01000001	75.82	extracellular solute-binding protein family 1	CAM_CRCL_20169	Rhodobacterales bacterium HTCC2255	367336	Bacteria	Alphaproteobacteria	50822	131	1	1	1	Bacteria;Proteobacteria;Alphaproteobacteria;Misc. Alphaproteobacteria;Environmental Alphaproteobacteria;Uncultured Alphaproteobacteria;Rhodobacterales bacterium HTCC2255								0	83	9
contig_14145_1_1019_+	1374	1019													gi114769494-NZ_AATR01000001	68.35	extracellular solute-binding protein family 1	CAM_CRCL_20169	Rhodobacterales bacterium HTCC2255	367336	Bacteria	Alphaproteobacteria	50822	131	1	1	1	Bacteria;Proteobacteria;Alphaproteobacteria;Misc. Alphaproteobacteria;Environmental Alphaproteobacteria;Uncultured Alphaproteobacteria;Rhodobacterales bacterium HTCC2255	_GAP_||PF01547	_GAP_||Bacterial extracellular solute-binding protein			ABC (binding protein)	sugar	2	0	185	3
contig_142399_1_418_-	418	418	sit:TM1040_2326	beta-Ig-H3/fasciclin						Q1GE58					contig_40111_149_2336-Pelagomonas	52.42		CAM_CRCL_16363	Pelagomonas calceolata , Strain CCMP1756	35677	Bacteria	Alphaproteobacteria	50822	131	0.3589	9	8	Bacteria;Proteobacteria;Alphaproteobacteria;Rhodobacterales;Rhodobacteraceae;Nautella;Nautella italica	PF02469	Fasciclin domain						0	7	168
contig_142_11_932_+	932	922													Desmer_2971-NC_018515	79.41	catalase/peroxidase HPI		Desulfosporosinus meridiei DSM 13257	768704	Bacteria	Alphaproteobacteria	50822	131	0.5558	37	36	Bacteria;Proteobacteria;Alphaproteobacteria;Rhizobiales;Rhizobiaceae;Rhizobium;Rhizobium BR816	_GAP_||PF00141	_GAP_||Peroxidase						0	172	17
contig_14378_1_212_+	763	212	lso:CKC_00335	F0F1 ATP synthase subunit alpha; K02111 F-type H+-transporting ATPase subunit alpha [EC:3.6.3.14]	lso01100||lso00190	K02111	F-type H+-transporting ATPase subunit alpha [EC:3.6.3.14]	Oxidative phosphorylation || Photosynthesis	3.6.3.14	E4UBS8	KOG1353	F0F1-type ATP synthase, alpha subunit	Energy production and conversion	METABOLISM	A252K18DRAFT_00055-A252K18DRAFT_contig_70_0.71	64.18	proton translocating ATP synthase, F1 alpha subunit		candidate division OP8 bacterium SCGC AAA252-K18	1047027	Bacteria	Alphaproteobacteria	50822	131	0.3726	138	123	Bacteria;Proteobacteria;Alphaproteobacteria;Rickettsiales;Rickettsiaceae;Rickettsia;Rickettsia amblyommii str. GAT-30V	PF00006	ATP synthase alpha/beta family, nucleotide-binding domain			F-ATPase		3	0	22	30
contig_14398_36_666_-	666	631													gi84515448-NZ_AAMS01000003	53.74	putative rhizopine uptake ABC transporter periplasmic solute-binding protein	CAM_CRCL_32479907	Loktanella vestfoldensis SKA53	314232	Bacteria	Alphaproteobacteria	50822	131	0.8924	15	15	Bacteria;Proteobacteria;Alphaproteobacteria;Rhizobiales;Rhizobiaceae;Ensifer;Ensifer USDA 6670	PF13407	PF13407			ABC (binding protein)	ribose	2	0	55	0
contig_14407_111_697_+	697	587	rli:RLO149_c002440	qor; quinone oxidoreductase Qor (EC:1.6.5.5)											RLO149_c002440-NC_015730	62.43	qor; quinone oxidoreductase Qor (EC:1.6.5.5)	CAM_CRCL_1330	Roseobacter litoralis Och 149	391595	Bacteria	Alphaproteobacteria	50822	131	0.9219	6	6	Bacteria;Proteobacteria;Alphaproteobacteria;Rhodobacterales;Rhodobacteraceae;Ruegeria;Ruegeria TW15	PF08240	Alcohol dehydrogenase GroES-like domain						0	55	6
contig_145171_1_347_-	347	347													YUIDRAFT_00759-YUIDRAFT_scaffold_86.87	38.81	D-alanyl-D-alanine carboxypeptidase.		Bradyrhizobium japonicum USDA 6	1037409	Bacteria	Alphaproteobacteria	50822	131	0.6483	3	3	Bacteria;Proteobacteria;Alphaproteobacteria;Rhizobiales;Bradyrhizobiaceae;Bradyrhizobium;Bradyrhizobium japonicum USDA 123								0	2	56
contig_14790_1_393_-	488	393	ttu:TERTU_2357	aminotransferase, class III						C5BK98					TERTU_2357-NC_012997	56.59	aminotransferase, class III	CAM_CRCL_32364493	Teredinibacter turnerae T7901	377629	Bacteria	Alphaproteobacteria	50822	131	0.719	3	3	Bacteria;Proteobacteria;Alphaproteobacteria;Rhodospirillales;Rhodospirillaceae;Thalassospira;Thalassospira xiamenensis M-5 = DSM 17429	PF00202	Aminotransferase class-III						0	74	1
contig_148087_1_361_+	395	361													B041DRAFT_07525-B041DRAFT_scaffold_103.104	27.27	hypothetical protein		Mesorhizobium WSM4349	1040988	Bacteria	Alphaproteobacteria	50822	131	1	1	1	Bacteria;Proteobacteria;Alphaproteobacteria;Rhizobiales;Phyllobacteriaceae;Mesorhizobium;Mesorhizobium WSM4349								0	6	68
contig_148492_1_452_+	452	452													RetlC8_010100022116-NZ_ABRD01002438	50	Gluconolactonase	CAM_CRCL_20450	Rhizobium etli CIAT 894	526945	Bacteria	Alphaproteobacteria	50822	131	0.8987	24	24	Bacteria;Proteobacteria;Alphaproteobacteria;Rhizobiales;Rhizobiaceae;Rhizobium;Rhizobium STM 6155	PF08450	SMP-30/Gluconolaconase/LRE-like region						0	57	88
contig_149392_239_326_-	326	88													gi493221853-NZ_AGSN01000096	74.07	O-acetylhomoserine aminocarboxypropyltransferase		Mesorhizobium amorphae CCNWGS0123	1082933	Bacteria	Alphaproteobacteria	50822	131	0.7554	22	22	Bacteria;Proteobacteria;Alphaproteobacteria;Rhizobiales;Rhizobiaceae;Rhizobium;Rhizobium gallicum bv. gallicum R602sp	PF01053	Cys/Met metabolism PLP-dependent enzyme						0	1	105
contig_149894_1_448_-	448	448	mgm:Mmc1_1473	hypothetical protein						A0L7N9					Mmc1_1473-NC_008576	29.33	hypothetical protein	CAM_CRCL_6253129	Magnetococcus marinus MC-1	156889	Bacteria	Alphaproteobacteria	50822	131	1	1	1	Bacteria;Proteobacteria;Alphaproteobacteria;Magnetococcales;Magnetococcaceae;Magnetococcus;Magnetococcus marinus MC-1								0	0	77
contig_150538_155_496_-	496	342	nve:NEMVE_v1g247336	hypothetical protein						A7STN4					NEMVEDRAFT_v1g247336-PA-scaffold_293Nemve1	73.21	Predicted protein [Source:UniProtKB/TrEMBL;Acc:A7STN4]	CAM_CRCL_4000179	Nematostella vectensis	45351	Bacteria	Alphaproteobacteria	50822	131	0.7035	58	58	Bacteria;Proteobacteria;Alphaproteobacteria;Rhizobiales;Bradyrhizobiaceae;Bradyrhizobium;Bradyrhizobium Cp5.3	PF00441	Acyl-CoA dehydrogenase, C-terminal domain						0	0	71
contig_15077_1_1013_+	1145	1013													gi114769132-NZ_AATR01000001	90.91	TRAP transporter solute receptor, TAXI family	CAM_CRCL_15668	Rhodobacterales bacterium HTCC2255	367336	Bacteria	Alphaproteobacteria	50822	131	0.659	5	5	Bacteria;Proteobacteria;Alphaproteobacteria;Rhodobacterales;Rhodobacteraceae;Octadecabacter;Octadecabacter arcticus 238	_GAP_||PF09084||_GAP_	_GAP_||NMT1/THI5 like||_GAP_	TIGR02122	TRAP transporter solute receptor, TAXI family	TRAP-T	C4-dicarboxylate	2	0	186	2
contig_15119_1_422_+	422	422	hba:Hbal_0726	TonB-dependent receptor plug						C6XPD4					Hbal_0726-NC_012982	60.43	TonB-dependent receptor plug	CAM_CRCL_32882523	Hirschia baltica ATCC 49814	582402	Bacteria	Alphaproteobacteria	50822	131	0.7489	5	5	Bacteria;Proteobacteria;Alphaproteobacteria;Caulobacterales;Hyphomonadaceae;Hirschia;Hirschia baltica ATCC 49814								0	144	2
contig_151830_106_609_+	609	504													gi498093902-NZ_AEUE01000001	34.78	alpha/beta hydrolase		Citromicrobium JLT1363	517722	Bacteria	Alphaproteobacteria	50822	131	0.7445	8	8	Bacteria;Proteobacteria;Alphaproteobacteria;Rickettsiales;Anaplasmataceae;Anaplasma;Anaplasma centrale str. Israel	_GAP_||PF12697	_GAP_||PF12697						0	2	77
contig_152162_1_748_+	748	748	sur:STAUR_4950	hypothetical protein						E3FFH1					STAUR_4950-NC_014623	31.21	hypothetical protein	CAM_CRCL_68912	Stigmatella aurantiaca DW4/3-1	378806	Bacteria	Alphaproteobacteria	50822	131	0.7893	2	2	Bacteria;Proteobacteria;Alphaproteobacteria;Rhodospirillales;Rhodospirillaceae;Azospirillum;Azospirillum brasilense Sp245								0	2	105
contig_15276_5_760_-	887	756	rru:Rru_A1871	Na/Pi cotransporter II-related; K03324 phosphate:Na+ symporter		K03324	phosphate:Na+ symporter			Q2RT74					F11_09615-NC_017584	36.1	Na/Pi cotransporter II-like protein	CAM_CRCL_32522115	Rhodospirillum rubrum F11	1036743	Bacteria	Alphaproteobacteria	50822	131	0.9091	22	22	Bacteria;Proteobacteria;Alphaproteobacteria;Rhizobiales;Brucellaceae;Brucella;Brucella BO2	PF02690	Na+/Pi-cotransporter			PNaS		4	6	72	0
contig_15428_1_700_+	700	700													gi126727582-NZ_AAXZ01000011	67.09	deoxyribodipyrimidine photolyase	CAM_CRCL_119335	Rhodobacteraceae bacterium HTCC2150	388401	Bacteria	Alphaproteobacteria	50822	131	0.8229	9	8	Bacteria;Proteobacteria;Alphaproteobacteria;Rhodobacterales;Rhodobacteraceae;Octadecabacter;Octadecabacter arcticus 238	PF03441	FAD binding domain of DNA photolyase						0	53	4
contig_15519_1_461_+	461	461	slo:Shew_0376	curlin-associated protein						A3Q9V0					gi149185763-NZ_ABCG01000004	37.25	curlin associated repeat protein	CAM_CRCL_4019315	Erythrobacter SD-21	161528	Bacteria	Alphaproteobacteria	50822	131	0.7893	2	2	Bacteria;Proteobacteria;Alphaproteobacteria;Sphingomonadales;Erythrobacteraceae;Erythrobacter;Erythrobacter SD-21								0	552	2
contig_15730_1_350_+	350	350	cps:CPS_4802	bifunctional aconitate hydratase 2/2-methylisocitrate dehydratase (EC:4.2.1.3); K01682 aconitate hydratase 2 [EC:4.2.1.3]	cps01120||cps01100||cps01110||cps00630||cps00020	K01682	aconitate hydratase 2 / 2-methylisocitrate dehydratase [EC:4.2.1.3 4.2.1.99]	Citrate cycle (TCA cycle) || Glyoxylate and dicarboxylate metabolism || Propanoate metabolism || Carbon fixation pathways in prokaryotes || Carbon metabolism || 2-Oxocarboxylic acid metabolism || Biosynthesis of amino acids	4.2.1.3	Q47UT1					CPS_4802-NC_003910	84.48	bifunctional aconitate hydratase 2/2-methylisocitrate dehydratase (EC:4.2.1.3); K01682 aconitate hydratase 2 [EC:4.2.1.3]	CAM_CRCL_34026158	Colwellia psychrerythraea 34H	167879	Bacteria	Alphaproteobacteria	50822	131	0.6619	20	20	Bacteria;Proteobacteria;Alphaproteobacteria;Rhodobacterales;Rhodobacteraceae;Pseudovibrio;Pseudovibrio FO-BEG1	PF11791	Aconitate B N-terminal domain						0	95	1
contig_15802_1_567_+	567	567	olu:OSTLU_28282	hypothetical protein						A4S9Q7					Phyra96736-scaffold_100Phyra1_1	28.33		CAM_CRCL_27561083	Phytophthora ramorum	164328	Bacteria	Alphaproteobacteria	50822	131	0.3488	6	6	Bacteria;Proteobacteria;Alphaproteobacteria;Rhizobiales;Bradyrhizobiaceae;Bradyrhizobium;Bradyrhizobium elkanii USDA 94								0	1411	33
contig_158779_45_374_+	374	330													A3A9DRAFT_02800-A3A9DRAFT_scaffold_69.70	51.4	Gluconolactonase		Mesorhizobium loti CJ3sym	1040982	Bacteria	Alphaproteobacteria	50822	131	0.8266	47	43	Bacteria;Proteobacteria;Alphaproteobacteria;Rhizobiales;Bradyrhizobiaceae;Bradyrhizobium;Bradyrhizobium Cp5.3	PF08450	SMP-30/Gluconolaconase/LRE-like region						0	39	194
contig_159303_60_358_+	358	299	bja:blr6629	hypothetical protein						Q89FS0					K289DRAFT_02740-K289DRAFT_scaffold00148.148	34.12	FecR family protein		Bradyrhizobium Cp5.3	443598	Bacteria	Alphaproteobacteria	50822	131	0.9725	2	2	Bacteria;Proteobacteria;Alphaproteobacteria;Rhizobiales;Bradyrhizobiaceae;Bradyrhizobium;Bradyrhizobium Cp5.3								0	3	54
contig_15976_1_521_+	521	521	pen:PSEEN4514	mdeB; 2-oxoacid dehydrogenase subunit E1 (EC:1.2.4.1); K00163 pyruvate dehydrogenase E1 component [EC:1.2.4.1]	pen00620||pen01100||pen01120||pen00290||pen00010||pen01110||pen00650||pen00020	K00163	pyruvate dehydrogenase E1 component [EC:1.2.4.1]	Glycolysis / Gluconeogenesis || Citrate cycle (TCA cycle) || Pyruvate metabolism || Carbon metabolism	1.2.4.1	Q1I589					gi126740251-NZ_AAYC01000011	89.53	oxoglutarate dehydrogenase (succinyl-transferring)	CAM_CRCL_2479	Roseobacter SK209-2-6	388739	Bacteria	Alphaproteobacteria	50822	131	0.851	4	4	Bacteria;Proteobacteria;Alphaproteobacteria;Rhodobacterales;Rhodobacteraceae;Roseobacter;Roseobacter MED193	PF00456	Transketolase, thiamine diphosphate binding domain						0	74	8
contig_159955_1_539_+	539	539													C882_2920-GCA_000315795.1_contig37	24.84	Cytoplasmic axial filament protein CafA and Ribonuclease G		Caenispirillum salinarum AK4	1238182	Bacteria	Alphaproteobacteria	50822	131	1	1	1	Bacteria;Proteobacteria;Alphaproteobacteria;Rhodospirillales;Rhodospirillaceae;Caenispirillum;Caenispirillum salinarum AK4								0	0	87
contig_16059_86_955_-	1385	870	apb:SAR116_1199	family 1 extracellular solute-binding protein (EC:4.99.1.-); K02027 multiple sugar transport system substrate-binding protein		K02027	multiple sugar transport system substrate-binding protein			D5BT45					gi114769030-NZ_AATR01000001	81.25	ABC transporter, substrate-binding protein, family 1	CAM_CRCL_56675	Rhodobacterales bacterium HTCC2255	367336	Bacteria	Alphaproteobacteria	50822	131	0.8535	2	2	Bacteria;Proteobacteria;Alphaproteobacteria;Misc. Alphaproteobacteria;Environmental Alphaproteobacteria;Uncultured Alphaproteobacteria;Rhodobacterales bacterium HTCC2255	PF01547||_GAP_	Bacterial extracellular solute-binding protein||_GAP_						0	698	6
contig_16059_985_1323_-	1385	339	apb:SAR116_1199	family 1 extracellular solute-binding protein (EC:4.99.1.-); K02027 multiple sugar transport system substrate-binding protein		K02027	multiple sugar transport system substrate-binding protein			D5BT45					gi114769030-NZ_AATR01000001	88.51	ABC transporter, substrate-binding protein, family 1	CAM_CRCL_56675	Rhodobacterales bacterium HTCC2255	367336	Bacteria	Alphaproteobacteria	50822	131	0.8535	2	2	Bacteria;Proteobacteria;Alphaproteobacteria;Misc. Alphaproteobacteria;Environmental Alphaproteobacteria;Uncultured Alphaproteobacteria;Rhodobacterales bacterium HTCC2255	_GAP_||PF01547	_GAP_||Bacterial extracellular solute-binding protein						0	204	0
contig_16349_10_360_-	360	351	azl:AZL_b01720	etfA, fixB; electron transfer flavoprotein, alpha subunit						D3P215					AZL_b01720-NC_013856	90.35	etfA, fixB; electron transfer flavoprotein, alpha subunit	CAM_CRCL_4010769	Azospirillum B510	137722	Bacteria	Alphaproteobacteria	50822	131	0.5626	50	37	Bacteria;Proteobacteria;Alphaproteobacteria;Rhodospirillales;Rhodospirillaceae;Azospirillum;Azospirillum B510	PF00766||_GAP_	Electron transfer flavoprotein FAD-binding domain||_GAP_						0	83	4
contig_16471_1_431_+	431	431	cak:Caul_3941	TonB-dependent receptor						B0SW22					Caul_3941-NC_010338	46.43	TonB-dependent receptor	CAM_CRCL_4010247	Caulobacter K31	366602	Bacteria	Alphaproteobacteria	50822	131	0.8671	4	4	Bacteria;Proteobacteria;Alphaproteobacteria;Caulobacterales;Caulobacteraceae;Caulobacter;Caulobacter K31	_GAP_||PF00593	_GAP_||TonB dependent receptor						0	356	0
contig_16779_1_1089_+	1142	1089	mmr:Mmar10_2650	TonB-dependent receptor, plug						Q0ALA7					Mmar10_2650-NC_008347	48.69	TonB-dependent receptor, plug	CAM_CRCL_30699	Maricaulis maris MCS10	394221	Bacteria	Alphaproteobacteria	50822	131	0.7089	9	9	Bacteria;Proteobacteria;Alphaproteobacteria;Sphingomonadales;Erythrobacteraceae;Erythrobacter;Erythrobacter SD-21	_GAP_||PF00593	_GAP_||TonB dependent receptor						0	490	2
contig_16780_1_1009_+	1280	1009	pde:Pden_5072	extracellular solute-binding protein; K02035 peptide/nickel transport system substrate-binding protein	pde02010	K02035	peptide/nickel transport system substrate-binding protein			A1BC88					HIMB100_00016630-GCA_000238815.2_contig10	65.15	ABC-type dipeptide transport system, periplasmic component		SAR116 cluster alpha proteobacterium HIMB100	909943	Bacteria	Alphaproteobacteria	50822	131	1	1	1	Bacteria;Proteobacteria;Alphaproteobacteria;SAR116;SAR116_X;SAR116_XX;SAR116 cluster alpha proteobacterium HIMB100	PF00496	Bacterial extracellular solute-binding proteins, family 5 Middle			ABC (binding protein)	dipeptide/oligopeptide	2	0	197	0
contig_168089_43_693_-	693	651									KOG4767	Cytochrome c oxidase, subunit II, and related proteins	Energy production and conversion	METABOLISM	HIMB59_00007530-NC_018644	41.51	cytochrome c oxidase subunit II		alpha proteobacterium HIMB59	744985	Bacteria	Alphaproteobacteria	50822	131	0.7355	6	6	Bacteria;Proteobacteria;Alphaproteobacteria;Rhizobiales;Xanthobacteraceae;Azorhizobium;Azorhizobium caulinodans ORS 571	_GAP_||PF00116	_GAP_||Cytochrome C oxidase subunit II, periplasmic domain						2	49	305
contig_168843_472_1080_+	1520	609	rhi:NGR_b19540	serine racemase (EC:5.1.1.-); K01754 threonine dehydratase [EC:4.3.1.19]	rhi01110||rhi00290||rhi00260||rhi01100	K01754	threonine dehydratase [EC:4.3.1.19]	Glycine, serine and threonine metabolism || Valine, leucine and isoleucine biosynthesis || Carbon metabolism || Biosynthesis of amino acids	4.3.1.19	C3KLW5	KOG1251	Serine racemase	Signal transduction mechanisms	CELLULAR PROCESSES AND SIGNALING	NGR_b19540-NC_012586	56.97	serine racemase (EC:5.1.1.-); K01754 threonine dehydratase [EC:4.3.1.19]	CAM_CRCL_33108385	Sinorhizobium fredii NGR234	394	Bacteria	Alphaproteobacteria	50822	131	0.637	28	27	Bacteria;Proteobacteria;Alphaproteobacteria;Rhizobiales;Rhizobiaceae;Ensifer;Ensifer USDA 6670	PF00291	Pyridoxal-phosphate dependent enzyme						0	74	6
contig_172310_623_1057_+	1156	435													MicloDRAFT_00026110-GCA_000262405.1_JH660642	22.69	PAS domain S-box		Microvirga WSM3557	754501	Bacteria	Alphaproteobacteria	50822	131	1	1	1	Bacteria;Proteobacteria;Alphaproteobacteria;Rhizobiales;Methylobacteriaceae;Microvirga;Microvirga WSM3557	PF14953	PF14953						0	0	53
contig_172620_1_361_+	605	361	smd:Smed_4447	beta-Ig-H3/fasciclin						A6UHW9					gi124004576-NZ_AAWS01000010	54.87	beta-Ig-H3/fasciclin	CAM_CRCL_16363	Microscilla marina ATCC 23134	313606	Bacteria	Alphaproteobacteria	50822	131	0.5215	19	18	Bacteria;Proteobacteria;Alphaproteobacteria;Rhizobiales;Rhizobiaceae;Ensifer;Ensifer USDA 6670	PF02469	Fasciclin domain						0	7	70
contig_174615_1070_1216_+	5106	147	eta:ETA_04660	putative periplasmic substrate-binding transport protein; K02016 iron complex transport system substrate-binding protein	eta02010	K02016	iron complex transport system substrate-binding protein	ABC transporters							TRICHSKD4_2975-NZ_GL476314	70.73	ABC transporter, substrate-binding protein	CAM_CRCL_4008740	Roseibium TrichSKD4	744980	Bacteria	Alphaproteobacteria	50822	131	0.716	4	4	Bacteria;Proteobacteria;Alphaproteobacteria;Rhizobiales;Phyllobacteriaceae;Nitratireductor;Nitratireductor pacificus pht-3B								0	1028	19
contig_174615_1280_1465_+	5106	186													PCNPT3_07260-NC_020802	47.92	iron ABC transporter	CAM_CRCL_32396611	Psychromonas CNPT3	314282	Bacteria	Alphaproteobacteria	50822	131	0.7893	2	2	Bacteria;Proteobacteria;Alphaproteobacteria;Rhodospirillales;Rhodospirillaceae;Thalassospira;Thalassospira profundimaris WP0211								1	304	13
contig_174615_1487_2005_+	5106	519													TRICHSKD4_4693-NZ_GL476320	81.87	putative ABC transporter permease protein	CAM_CRCL_12755	Roseibium TrichSKD4	744980	Bacteria	Alphaproteobacteria	50822	131	1	1	1	Bacteria;Proteobacteria;Alphaproteobacteria;Rhodobacterales;Rhodobacteraceae;Roseibium;Roseibium TrichSKD4	PF01032	FecCD transport family						5	1721	51
contig_174615_2017_2340_+	5106	324													NA2_15007-GCA_000300335.1_contig17	80.95	iron ABC transporter		Nitratireductor pacificus pht-3B	391937	Bacteria	Alphaproteobacteria	50822	131	0.7619	3	3	Bacteria;Proteobacteria;Alphaproteobacteria;Rhizobiales;Phyllobacteriaceae;Nitratireductor;Nitratireductor pacificus pht-3B	PF01032	FecCD transport family						3	1181	26
contig_174615_2343_3008_+	5106	666													TRICHSKD4_4694-NZ_GL476320	61.11	iron(III) dicitrate ABC transporter, ATP-binding protein FecE	CAM_CRCL_20708	Roseibium TrichSKD4	744980	Bacteria	Alphaproteobacteria	50822	131	1	1	1	Bacteria;Proteobacteria;Alphaproteobacteria;Rhodobacterales;Rhodobacteraceae;Roseibium;Roseibium TrichSKD4	PF00005||_GAP_	ABC transporter||_GAP_			ABC		2	0	2406	63
contig_174615_57_1007_+	5106	951													TRICHSKD4_4692-NZ_GL476320	68.37	ABC transporter, substrate-binding protein	CAM_CRCL_4008740	Roseibium TrichSKD4	744980	Bacteria	Alphaproteobacteria	50822	131	1	1	1	Bacteria;Proteobacteria;Alphaproteobacteria;Rhodobacterales;Rhodobacteraceae;Roseibium;Roseibium TrichSKD4	_GAP_||PF01497	_GAP_||Periplasmic binding protein						0	5875	149
contig_175087_428_1066_+	1944	639	bja:blr7615	dht; phenylhydantoinase (EC:3.5.2.2); K01464 dihydropyrimidinase [EC:3.5.2.2]	bja01100||bja00410||bja00240||bja00770	K01464	dihydropyrimidinase [EC:3.5.2.2]	Pyrimidine metabolism || beta-Alanine metabolism || Pantothenate and CoA biosynthesis || Drug metabolism - other enzymes	3.5.2.2	Q89D30	KOG2584	Dihydroorotase and related enzymes	Nucleotide transport and metabolism	METABOLISM	YUEDRAFT_04857-YUEDRAFT_scaffold_100.101	55.29	D-hydantoinase		Bradyrhizobium japonicum USDA 122	1038861	Bacteria	Alphaproteobacteria	50822	131	0.5261	16	16	Bacteria;Proteobacteria;Alphaproteobacteria;Rhizobiales;Bradyrhizobiaceae;Bradyrhizobium;Bradyrhizobium USDA 3384	_GAP_||PF13594	_GAP_||PF13594						0	6	208
contig_175717_1_645_+	645	645													GNIT_3049-NC_016041	49.09	hypothetical protein		Glaciecola nitratireducens FR1064	1085623	Bacteria	Alphaproteobacteria	50822	131	0.7893	2	2	Bacteria;Proteobacteria;Alphaproteobacteria;Rhodobacterales;Rhodobacteraceae;Roseobacter;Roseobacter denitrificans OCh 114	_GAP_||PF02469	_GAP_||Fasciclin domain						0	28	542
contig_175778_1_985_+	1142	985	hne:HNE_0985	dhlA; haloalkane dehalogenase (EC:3.8.1.5); K01563 haloalkane dehalogenase [EC:3.8.1.5]	hne01100||hne01120||hne00361||hne00625	K01563	haloalkane dehalogenase [EC:3.8.1.5]	Chlorocyclohexane and chlorobenzene degradation || Chloroalkane and chloroalkene degradation	3.8.1.5	Q0C3I4					HNE_0985-NC_008358	43.93	dhlA; haloalkane dehalogenase (EC:3.8.1.5); K01563 haloalkane dehalogenase [EC:3.8.1.5]	CAM_CRCL_3438	Hyphomonas neptunium ATCC 15444	228405	Bacteria	Alphaproteobacteria	50822	131	0.7893	2	2	Bacteria;Proteobacteria;Alphaproteobacteria;Caulobacterales;Hyphomonadaceae;Hyphomonas;Hyphomonas neptunium ATCC 15444	PF12697	PF12697						0	28	256
contig_180328_614_910_-	1601	297													BYI23_C005950-NC_016590	51.55	gluconolactonase		Burkholderia YI23	1097668	Bacteria	Alphaproteobacteria	50822	131	0.8172	23	22	Bacteria;Proteobacteria;Alphaproteobacteria;Rhizobiales;Bradyrhizobiaceae;Bradyrhizobium;Bradyrhizobium Cp5.3	PF08450	SMP-30/Gluconolaconase/LRE-like region						0	44	107
contig_180328_940_1600_-	1601	661	rlg:Rleg_3774	gluconolactonase (EC:3.1.1.17); K01053 gluconolactonase [EC:3.1.1.17]	rlg00053||rlg00930||rlg01110||rlg01100||rlg00030||rlg01120	K01053	gluconolactonase [EC:3.1.1.17]	Pentose phosphate pathway || Ascorbate and aldarate metabolism || Caprolactam degradation || Carbon metabolism || Degradation of aromatic compounds	3.1.1.17	C6AX93					RetlC8_010100022116-NZ_ABRD01002438	45.22	Gluconolactonase	CAM_CRCL_20450	Rhizobium etli CIAT 894	526945	Bacteria	Alphaproteobacteria	50822	131	0.9083	17	16	Bacteria;Proteobacteria;Alphaproteobacteria;Rhizobiales;Rhizobiaceae;Rhizobium;Rhizobium leguminosarum bv. viciae 3841	PF08450||_GAP_	SMP-30/Gluconolaconase/LRE-like region||_GAP_						0	16	113
contig_180594_1_853_+	853	853													MicloDRAFT_00026030-GCA_000262405.1_JH660642	23.18	methyl-accepting chemotaxis protein		Microvirga WSM3557	754501	Bacteria	Alphaproteobacteria	50822	131	1	1	1	Bacteria;Proteobacteria;Alphaproteobacteria;Rhizobiales;Methylobacteriaceae;Microvirga;Microvirga WSM3557								0	124	182
contig_18124_1_334_-	334	334	rva:Rvan_2017	phosphoribosylformimino-5-aminoimidazole carboxamide ribotide isomerase (EC:5.3.1.16); K01814 phosphoribosylformimino-5-aminoimidazole carboxamide ribotide isomerase [EC:5.3.1.16]	rva01100||rva00340||rva01110	K01814	phosphoribosylformimino-5-aminoimidazole carboxamide ribotide isomerase [EC:5.3.1.16]	Histidine metabolism || Biosynthesis of amino acids	5.3.1.16	E3I1G1					Rvan_2017-NC_014664	40.91	phosphoribosylformimino-5-aminoimidazole carboxamide ribotide isomerase (EC:5.3.1.16); K01814 phosphoribosylformimino-5-aminoimidazole carboxamide ribotide isomerase [EC:5.3.1.16]	CAM_CRCL_81	Rhodomicrobium vannielii ATCC 17100	648757	Bacteria	Alphaproteobacteria	50822	131	0.6525	5	5	Bacteria;Proteobacteria;Alphaproteobacteria;Rhizobiales;Phyllobacteriaceae;Chelativorans;Chelativorans BNC1	PF00977	Histidine biosynthesis protein						0	69	2
contig_18157_1_458_-	458	458													B488_07230-NC_019907	61.97	Isopentenyl-diphosphate delta-isomerase, FMN-dependent (EC:5.3.3.2)		Liberibacter crescens BT-1	1215343	Bacteria	Alphaproteobacteria	50822	131	0.7619	3	3	Bacteria;Proteobacteria;Alphaproteobacteria;Rhizobiales;Liberbacter_Family;Liberibacter;Liberibacter crescens BT-1	PF01070	FMN-dependent dehydrogenase						0	82	0
contig_181835_1_158_+	1036	158													TH2_12002-GCA_000300275.1_contig6	44.44	major facilitator transporter		Thalassospira profundimaris WP0211	1177928	Bacteria	Alphaproteobacteria	50822	131	1	1	1	Bacteria;Proteobacteria;Alphaproteobacteria;Rhodospirillales;Rhodospirillaceae;Thalassospira;Thalassospira profundimaris WP0211								0	29	384
contig_181967_1_552_+	1327	552	sil:SPO0521	glutamate/glutamine/aspartate/asparagine ABC transporter, permease protein; K09971 general L-amino acid transport system permease protein	sil02010	K09971	general L-amino acid transport system permease protein	ABC transporters		Q5LW22					SPO0521-NC_003911	72.53	glutamate/glutamine/aspartate/asparagine ABC transporter, permease protein; K09971 general L-amino acid transport system permease protein	CAM_CRCL_32432723	Ruegeria pomeroyi DSS-3	246200	Bacteria	Alphaproteobacteria	50822	131	0.8992	4	4	Bacteria;Proteobacteria;Alphaproteobacteria;Rhodobacterales;Rhodobacteraceae;Ruegeria;Ruegeria TM1040	PF00528	Binding-protein-dependent transport system inner membrane component			ABC (membrane)	amino aicd (glutamine/glutamate/aspartate?)	3	4	57	2
contig_181974_43_1008_+	1529	966	apb:SAR116_0057	TRAP dicarboxylate transporter subunit DctP (EC:3.6.1.-)						D5BNN3					SAR116_0057-NC_014010	88.06	TRAP dicarboxylate transporter subunit DctP (EC:3.6.1.-)	CAM_CRCL_14737	Puniceispirillum marinum IMCC1322	488538	Bacteria	Alphaproteobacteria	50822	131	0.8047	3	3	Bacteria;Proteobacteria;Alphaproteobacteria;Misc. Alphaproteobacteria;Environmental Alphaproteobacteria;Uncultured Alphaproteobacteria;Rhodobacterales bacterium HTCC2255	_GAP_||PF03480	_GAP_||Bacterial extracellular solute-binding protein, family 7			TRAP-T		2	0	259	12
contig_181993_418_1011_+	1130	594	mmr:Mmar10_1669	short-chain dehydrogenase/reductase SDR						Q0AP26					CbatJ_010100001045-NZ_ADAE01000002	58.46	short-chain dehydrogenase/reductase SDR	CAM_CRCL_4010572	Citromicrobium bathyomarinum JL354	685035	Bacteria	Alphaproteobacteria	50822	131	0.7619	3	3	Bacteria;Proteobacteria;Alphaproteobacteria;Caulobacterales;Hyphomonadaceae;Maricaulis;Maricaulis maris MCS10	_GAP_||PF00106	_GAP_||short chain dehydrogenase						0	102	4
contig_182757_1_525_+	525	525	bbt:BBta_5403	hypothetical protein						A5EMI3					BBta_5403-NC_009485	29.91	hypothetical protein	CAM_CRCL_14255644	Bradyrhizobium BTAi1	288000	Bacteria	Alphaproteobacteria	50822	131	1	1	1	Bacteria;Proteobacteria;Alphaproteobacteria;Rhizobiales;Bradyrhizobiaceae;Bradyrhizobium;Bradyrhizobium BTAi1								0	8	59
contig_182789_979_1695_-	1839	717	rli:RLO149_c015810	galactoside ABC transporter ATP-binding protein											gi84516955-NZ_AAMS01000008	78.79	ABC transporter related	CAM_CRCL_32373808	Loktanella vestfoldensis SKA53	314232	Bacteria	Alphaproteobacteria	50822	131	0.8484	25	25	Bacteria;Proteobacteria;Alphaproteobacteria;Rhodobacterales;Rhodobacteraceae;Roseobacter;Roseobacter CCS2	PF00005||_GAP_	ABC transporter||_GAP_			ABC		2	0	86	0
contig_183439_49_602_+	602	554	mno:Mnod_4880	tail collar domain-containing protein						B8IH47					gi126645099-NZ_AAXU01000001	47.8	phage Tail Collar	CAM_CRCL_4006088	Algoriphagus machipongonensis	388413	Bacteria	Alphaproteobacteria	50822	131	0.5738	6	6	Bacteria;Proteobacteria;Alphaproteobacteria;Rhizobiales;Methylobacteriaceae;Methylobacterium;Methylobacterium nodulans ORS 2060	PF07484||_GAP_	Phage Tail Collar Domain||_GAP_						0	50	0
contig_183732_17_945_+	945	929	pla:Plav_0185	TonB-dependent hemoglobin/transferrin/lactoferrin family receptor; K02014 iron complex outermembrane recepter protein		K02014	iron complex outermembrane recepter protein			A7HPH5					Cyan10605_2011-Cyan10605_Contig594	32.19	TonB-dependent hemoglobin/transferrin/lactoferrin family receptor		Cyanobacterium aponinum PCC 10605	755178	Bacteria	Alphaproteobacteria	50822	131	0.6976	3	3	Bacteria;Proteobacteria;Alphaproteobacteria;Rhizobiales;Rhodobiaceae;Parvibaculum;Parvibaculum lavamentivorans DS-1	PF07715||_GAP_	TonB-dependent Receptor Plug Domain||_GAP_						0	1102	38
contig_18385_236_802_-	2110	567	apb:SAR116_1061	hypothetical protein						D5BSQ7					SAR116_1061-NC_014010	34.3	hypothetical protein	CAM_CRCL_4043607	Puniceispirillum marinum IMCC1322	488538	Bacteria	Alphaproteobacteria	50822	131	1	1	1	Bacteria;Proteobacteria;Alphaproteobacteria;SAR116;SAR116_X;SAR116_XX;Puniceispirillum marinum IMCC1322								0	425	28
contig_183903_1_767_+	767	767	apb:SAR116_1570	catalase (EC:1.11.1.6); K03782 catalase/peroxidase [EC:1.11.1.6 1.11.1.7]	apb00360||apb01120||apb01110||apb00680||apb01100||apb00380	K03782	catalase-peroxidase [EC:1.11.1.21]	Phenylalanine metabolism || Tryptophan metabolism || Phenylpropanoid biosynthesis	1.11.1.6||1.11.1.7	D5BU66					SAR116_1570-NC_014010	82.75	catalase (EC:1.11.1.6); K03782 catalase/peroxidase [EC:1.11.1.6 1.11.1.7]	CAM_CRCL_843	Puniceispirillum marinum IMCC1322	488538	Bacteria	Alphaproteobacteria	50822	131	0.5262	3	3	Bacteria;Proteobacteria;Alphaproteobacteria;SAR116;SAR116_X;SAR116_XX;Puniceispirillum marinum IMCC1322	PF00141	Peroxidase						0	136	4
contig_18422_54_758_-	795	705													gi159180346-ABHC01000006	48.87	Sel1 repeat protein	CAM_CRCL_46205	alpha proteobacterium BAL199	331869	Bacteria	Alphaproteobacteria	50822	131	1	1	1	Bacteria;Proteobacteria;Alphaproteobacteria;Rhodospirillales;Rhodospirillaceae;Thalassobaculum;alpha proteobacterium BAL199	_GAP_||PF08238||_GAP_	_GAP_||Sel1 repeat||_GAP_						1	81	4
contig_18433_1_751_-	751	751	rec:RHECIAT_CH0003978	putative gluconolactonase protein (EC:3.1.1.17); K01053 gluconolactonase [EC:3.1.1.17]	rec01110||rec01120||rec00030||rec00930||rec01100||rec00053	K01053	gluconolactonase [EC:3.1.1.17]	Pentose phosphate pathway || Ascorbate and aldarate metabolism || Caprolactam degradation || Carbon metabolism || Degradation of aromatic compounds	3.1.1.17	B3Q0X4					RetlC8_010100022116-NZ_ABRD01002438	41.94	Gluconolactonase	CAM_CRCL_20450	Rhizobium etli CIAT 894	526945	Bacteria	Alphaproteobacteria	50822	131	0.79	25	25	Bacteria;Proteobacteria;Alphaproteobacteria;Rhizobiales;Rhizobiaceae;Rhizobium;Rhizobium etli CIAT 652	PF08450||_GAP_	SMP-30/Gluconolaconase/LRE-like region||_GAP_						0	113	228
contig_184557_1_834_+	834	834	sgr:SGR_77t || sgr:SGR_7062t	hypothetical protein || hypothetical protein						B1VM05					gi114770803-NZ_AATR01000005	55.25	glucan endo-1,3-beta-D-glucosidase	CAM_CRCL_46034	Rhodobacterales bacterium HTCC2255	367336	Bacteria	Alphaproteobacteria	50822	131	0.7893	2	2	Bacteria;Proteobacteria;Alphaproteobacteria;Misc. Alphaproteobacteria;Environmental Alphaproteobacteria;Uncultured Alphaproteobacteria;Rhodobacterales bacterium HTCC2255								0	464	24
contig_186304_257_370_-	370	114	apb:SAR116_2126	hypothetical protein						D5BNH6					HIMB100_00014430-GCA_000238815.2_contig10	76.67	Bacteriorhodopsin-like protein		SAR116 cluster alpha proteobacterium HIMB100	909943	Bacteria	Alphaproteobacteria	50822	131	0.9725	2	2	Bacteria;Proteobacteria;Alphaproteobacteria;SAR116;SAR116_X;SAR116_XX;Puniceispirillum marinum IMCC1322								1	112	8256
contig_1867_1_361_+	361	361	apb:SAR116_1389	ABC transporter nucleotide binding/ATPase protein (EC:3.6.3.32); K02000 glycine betaine/proline transport system ATP-binding protein [EC:3.6.3.32]	apb02010	K02000	glycine betaine/proline transport system ATP-binding protein [EC:3.6.3.32]	ABC transporters	3.6.3.32	D5BTN5					SAR116_1389-NC_014010	53.85	ABC transporter nucleotide binding/ATPase protein (EC:3.6.3.32); K02000 glycine betaine/proline transport system ATP-binding protein [EC:3.6.3.32]	CAM_CRCL_12671	Puniceispirillum marinum IMCC1322	488538	Bacteria	Alphaproteobacteria	50822	131	0.8535	2	2	Bacteria;Proteobacteria;Alphaproteobacteria;Misc. Alphaproteobacteria;Environmental Alphaproteobacteria;Uncultured Alphaproteobacteria;Rhodobacterales bacterium HTCC2255								0	65	0
contig_188907_3054_3899_+	5050	846													TR2A62_3573-NZ_GG697169	83.39	ABC transporter permease protein	CAM_CRCL_19339	Thalassiobium R2A62	633131	Bacteria	Alphaproteobacteria	50822	131	1	1	1	Bacteria;Proteobacteria;Alphaproteobacteria;Rhodobacterales;Rhodobacteraceae;Loktanella;Thalassiobium R2A62	_GAP_||PF00528	_GAP_||Binding-protein-dependent transport system inner membrane component			ABC (membrane)	sugar	3	6	322	0
contig_189573_1_718_+	732	718													TR2A62_0230-NZ_GG697169	40	morn motif-containing protein	CAM_CRCL_4012253	Thalassiobium R2A62	633131	Bacteria	Alphaproteobacteria	50822	131	0.9403	2	2	Bacteria;Proteobacteria;Alphaproteobacteria;Rhodobacterales;Rhodobacteraceae;Loktanella;Thalassiobium R2A62	_GAP_||PF02493||_GAP_	_GAP_||MORN repeat||_GAP_						1	46	170
contig_189959_1_1050_+	1051	1050	kra:Krad_1491	gluconolactonase (EC:3.1.1.17); K01053 gluconolactonase [EC:3.1.1.17]	kra00930||kra00053||kra00030||kra01110||kra01120||kra01100	K01053	gluconolactonase [EC:3.1.1.17]	Pentose phosphate pathway || Ascorbate and aldarate metabolism || Caprolactam degradation || Carbon metabolism || Degradation of aromatic compounds	3.1.1.17	A6W840					Krad_1491-NC_009664	38.59	gluconolactonase (EC:3.1.1.17)	CAM_CRCL_20450	Kineococcus radiotolerans SRS30216	266940	Bacteria	Alphaproteobacteria	50822	131	0.8266	49	46	Bacteria;Proteobacteria;Alphaproteobacteria;Rhizobiales;Rhizobiaceae;Rhizobium;Rhizobium leguminosarum bv. viciae 128C53	_GAP_||PF08450||_GAP_	_GAP_||SMP-30/Gluconolaconase/LRE-like region||_GAP_						0	53	1153
contig_190412_1_558_+	964	558													gi149913335-NZ_ABCR01000002	30	hypothetical protein	CAM_CRCL_6526111	Roseobacter AzwK-3b	351016	Bacteria	Alphaproteobacteria	50822	131	1	2	1	Bacteria;Proteobacteria;Alphaproteobacteria;Rhodobacterales;Rhodobacteraceae;Roseobacter;Roseobacter AzwK-3b								1	23	35
contig_193467_1_560_+	560	560	zmn:Za10_0515	hypothetical protein						C8WBH8					Za10_0515-NC_013355	42.86	hypothetical protein	CAM_CRCL_33226791	Zymomonas mobilis subsp. mobilis NCIMB 11163	622759	Bacteria	Alphaproteobacteria	50822	131	0.9633	3	3	Bacteria;Proteobacteria;Alphaproteobacteria;Sphingomonadales;Sphingomonadaceae;Zymomonas;Zymomonas mobilis subsp. mobilis ATCC 29191	_GAP_||PF12697	_GAP_||PF12697						0	0	285
contig_193876_1_401_-	401	401													OA238_c41170-NC_020908	53.12	porin-like protein		Octadecabacter arcticus 238	391616	Bacteria	Alphaproteobacteria	50822	131	1	1	1	Bacteria;Proteobacteria;Alphaproteobacteria;Rhodobacterales;Rhodobacteraceae;Octadecabacter;Octadecabacter arcticus 238								0	57	5
contig_194953_994_1890_-	1891	897	atu:Atu1632	dimethylglycine dehydrogenase; K00315 dimethylglycine dehydrogenase [EC:1.5.99.2]	atu00260||atu01100	K00315	dimethylglycine dehydrogenase [EC:1.5.8.4]	Glycine, serine and threonine metabolism	1.5.99.2	Q8U599					gi119476054-NZ_AAVT01000002	78.64	dimethylglycine dehydrogenase	CAM_CRCL_4001313	marine gamma proteobacterium HTCC2143	247633	Bacteria	Alphaproteobacteria	50822	131	0.8328	10	10	Bacteria;Proteobacteria;Alphaproteobacteria;Rhizobiales;Rhizobiaceae;Agrobacterium;Agrobacterium ATCC 31749	PF01266||_GAP_	FAD dependent oxidoreductase||_GAP_						0	177	8
contig_197592_303_983_-	2194	681	atu:Atu4739	flavin-containing monooxygenase; K07222 putative flavoprotein involved in K+ transport		K07222	putative flavoprotein involved in K+ transport			Q7CVQ8					gi493354756-NZ_AECL01000014	69.33	FAD-dependent oxidoreductase		Agrobacterium ATCC 31749	82789	Bacteria	Alphaproteobacteria	50822	131	0.6625	41	41	Bacteria;Proteobacteria;Alphaproteobacteria;Rhizobiales;Phyllobacteriaceae;Mesorhizobium;Mesorhizobium loti CJ3sym								0	25	300
contig_197592_992_2192_-	2194	1201	pin:Ping_2542	monooxygenase protein, putative; K07222 putative flavoprotein involved in K+ transport		K07222	putative flavoprotein involved in K+ transport			A1SXP8					Ping_2542-NC_008709	60.24	monooxygenase protein, putative; K07222 putative flavoprotein involved in K+ transport	CAM_CRCL_18012	Psychromonas ingrahamii 37	357804	Bacteria	Alphaproteobacteria	50822	131	0.74	29	26	Bacteria;Proteobacteria;Alphaproteobacteria;Rhodobacterales;Rhodobacteraceae;Rhodobacter;Rhodobacter sphaeroides ATCC 17029	_GAP_||PF13738	_GAP_||PF13738						0	46	444
contig_197604_78_884_-	1208	807													gi86137520-NZ_AANB01000003	36.14	mucin-associated surface protein	CAM_CRCL_4233839	Roseobacter MED193	314262	Bacteria	Alphaproteobacteria	50822	131	1	1	1	Bacteria;Proteobacteria;Alphaproteobacteria;Rhodobacterales;Rhodobacteraceae;Roseobacter;Roseobacter MED193								0	40	349
contig_197748_1059_1331_+	4531	273	pgv:SL003B_0406	Insulin-cleaving metalloproteinase outer membrane protein; K07231 putative iron-regulated protein		K07231	putative iron-regulated protein								gi118592450-NZ_AAUW01000019	55.81	hypothetical signal peptide protein	CAM_CRCL_4005414	Labrenzia aggregata IAM 12614	384765	Bacteria	Alphaproteobacteria	50822	131	0.7957	7	7	Bacteria;Proteobacteria;Alphaproteobacteria;Rhodobacterales;Rhodobacteraceae;Labrenzia;Labrenzia aggregata IAM 12614								0	910	33
contig_197748_1394_2008_+	4531	615													gi89092301-NZ_AAOW01000002	56.07	conserved hypothetical protein	CAM_CRCL_31872433	Neptuniibacter caesariensis	207954	Bacteria	Alphaproteobacteria	50822	131	0.7893	2	2	Bacteria;Proteobacteria;Alphaproteobacteria;Rhodospirillales;Rhodospirillaceae;Caenispirillum;Caenispirillum salinarum AK4	_GAP_||PF06537	_GAP_||Protein of unknown function (DUF1111)						1	245	6
contig_197748_3999_4527_+	4531	529	hch:HCH_00180	hypothetical protein; K09947 hypothetical protein		K09947	hypothetical protein			Q2SQH6					SADFL11_3006-NZ_EQ973121	39.77	conserved hypothetical protein	CAM_CRCL_4016806	Labrenzia alexandrii DFL-11	244592	Bacteria	Alphaproteobacteria	50822	131	1	1	1	Bacteria;Proteobacteria;Alphaproteobacteria;Rhodobacterales;Rhodobacteraceae;Labrenzia;Labrenzia alexandrii DFL-11	_GAP_||PF07433	_GAP_||Protein of unknown function (DUF1513)						0	51	0
contig_198409_91_736_-	736	646													gi84686209-NZ_AAMT01000009	50	beta-Ig-H3/fasciclin	CAM_CRCL_32810891	Maritimibacter alkaliphilus HTCC2654	314271	Bacteria	Alphaproteobacteria	50822	131	1	1	1	Bacteria;Proteobacteria;Alphaproteobacteria;Rhodobacterales;Rhodobacteraceae;Maritimibacter;Maritimibacter alkaliphilus HTCC2654	_GAP_||PF02469	_GAP_||Fasciclin domain						0	143	1749
contig_198956_356_739_-	821	384	azl:AZL_d01030	hypothetical protein						D3P5K0					AZL_d01030-NC_013858	38.81	hypothetical protein	CAM_CRCL_4374	Azospirillum B510	137722	Bacteria	Alphaproteobacteria	50822	131	0.6837	6	5	Bacteria;Proteobacteria;Alphaproteobacteria;Rhodospirillales;Rhodospirillaceae;Azospirillum;Azospirillum B510	PF11351	Protein of unknown function (DUF3154)						2	55	1
contig_199833_71_946_-	1308	876	rlt:Rleg2_5115	hypothetical protein						B6A142					RLEG17DRAFT_3018-RLEG17DRAFT_Scaffold7.1	32.5	hypothetical protein		Rhizobium leguminosarum bv. viciae 248	936136	Bacteria	Alphaproteobacteria	50822	131	0.9431	5	5	Bacteria;Proteobacteria;Alphaproteobacteria;Rhizobiales;Rhizobiaceae;Rhizobium;Rhizobium leguminosarum bv. trifolii WSM2304								0	12	900
contig_22382_1_477_-	477	477	ent:Ent638_0846	transport protein						A4W750					Meslo2DRAFT_6410-Meslo2DRAFT_Scaffold1.1	57.78	ABC-type long-chain fatty acid transport system, fused permease and ATPase components		Mesorhizobium loti R88b	935548	Bacteria	Alphaproteobacteria	50822	131	0.7811	5	5	Bacteria;Proteobacteria;Alphaproteobacteria;Rhizobiales;Rhizobiaceae;Rhizobium;Rhizobium STM 6155	PF05992	SbmA/BacA-like family			PUP	peptide uptake	4	3	0	74
contig_2452_1_957_-	1137	957	ccr:CC_3127 || ccs:CCNA_03227	TonB-dependent receptor || TonB-dependent receptor						B8H3T8					CCNA_03227-NC_011916	53.92	TonB-dependent receptor	CAM_CRCL_4010247	Caulobacter crescentus NA1000	565050	Bacteria	Alphaproteobacteria	50822	131	0.884	3	3	Bacteria;Proteobacteria;Alphaproteobacteria;Caulobacterales;Caulobacteraceae;Caulobacter;Caulobacter crescentus NA1000	PF07715||_GAP_	TonB-dependent Receptor Plug Domain||_GAP_						0	1102	7
contig_2465_1_998_-	1139	998	apb:SAR116_1391	glycine betaine ABC transporter substrate-binding protein (EC:1.1.1.103); K02002 glycine betaine/proline transport system substrate-binding protein	apb02010	K02002	glycine betaine/proline transport system substrate-binding protein	ABC transporters		D5BTN7					gi114769692-NZ_AATR01000002	63.33	substrate-binding region of ABC-type glycine betaine transport system	CAM_CRCL_2583	Rhodobacterales bacterium HTCC2255	367336	Bacteria	Alphaproteobacteria	50822	131	1	1	1	Bacteria;Proteobacteria;Alphaproteobacteria;Misc. Alphaproteobacteria;Environmental Alphaproteobacteria;Uncultured Alphaproteobacteria;Rhodobacterales bacterium HTCC2255	PF04069	Substrate binding domain of ABC-type glycine betaine transport system						0	578	20
contig_2519_1104_1374_+	1375	271													PJE062_1180-NZ_DS996805	77.53	ribose ABC transporter, periplasmic D-ribose-binding protein	CAM_CRCL_13789	Pseudovibrio JE062	439495	Bacteria	Alphaproteobacteria	50822	131	0.9725	2	2	Bacteria;Proteobacteria;Alphaproteobacteria;Rhodobacterales;Rhodobacteraceae;Pseudovibrio;Pseudovibrio FO-BEG1	PF13407	PF13407			ABC (binding protein)	ribose	2	0	174	0
contig_2519_517_1098_+	1375	582													PJE062_1180-NZ_DS996805	70.39	ribose ABC transporter, periplasmic D-ribose-binding protein	CAM_CRCL_13789	Pseudovibrio JE062	439495	Bacteria	Alphaproteobacteria	50822	131	0.8398	4	4	Bacteria;Proteobacteria;Alphaproteobacteria;Rhodobacterales;Rhodobacteraceae;Pseudovibrio;Pseudovibrio FO-BEG1	PF13407	PF13407			ABC (binding protein)	ribose	2	1	322	6
contig_2520_145_1020_+	1342	876	pgv:SL003B_0823	Twin-arginine translocation pathway signal											gi88798024-NZ_AAOE01000004	78.35	trap dicarboxylate transporter- dctp subunit	CAM_CRCL_33392507	Reinekea blandensis MED297	314283	Bacteria	Alphaproteobacteria	50822	131	0.7893	2	2	Bacteria;Proteobacteria;Alphaproteobacteria;SAR116;SAR116_X;SAR116_XX;SAR116 cluster alpha proteobacterium HIMB100	_GAP_||PF03480	_GAP_||Bacterial extracellular solute-binding protein, family 7						0	1516	31
contig_2568_81_1115_+	1142	1035	apb:SAR116_0451	glutamate/glutamine/aspartate/asparagine ABC transporter periplasmic substrate-binding protein (EC:4.2.1.51); K09969 general L-amino acid transport system substrate-binding protein	apb02010	K09969	general L-amino acid transport system substrate-binding protein	ABC transporters		D5BQY0					gi114771237-NZ_AATR01000007	63.21	lysine-arginine-ornithine-binding periplasmic protein	CAM_CRCL_3107	Rhodobacterales bacterium HTCC2255	367336	Bacteria	Alphaproteobacteria	50822	131	0.7232	23	22	Bacteria;Proteobacteria;Alphaproteobacteria;Rhodobacterales;Rhodobacteraceae;Roseovarius;Roseovarius 217	_GAP_||PF00497||_GAP_	_GAP_||Bacterial extracellular solute-binding proteins, family 3||_GAP_						0	357	15
contig_2600_55_1032_+	1142	978													OAN307_c20330-NC_020911	76	dctP2; TRAP transporter periplasmatic solute-binding protein DctP	CAM_CRCL_27802	Octadecabacter antarcticus 307	391626	Bacteria	Alphaproteobacteria	50822	131	0.9403	2	2	Bacteria;Proteobacteria;Alphaproteobacteria;Rhodobacterales;Rhodobacteraceae;Octadecabacter;Octadecabacter antarcticus 307	_GAP_||PF03480	_GAP_||Bacterial extracellular solute-binding protein, family 7			TRAP-T		2	0	606	16
contig_2694_1_914_-	1212	914													PSE_3179-NC_016642	57.89	rbsA; Ribose import ATP-binding protein RbsA		Pseudovibrio FO-BEG1	911045	Bacteria	Alphaproteobacteria	50822	131	0.8325	7	7	Bacteria;Proteobacteria;Alphaproteobacteria;Rhodobacterales;Rhodobacteraceae;Pseudovibrio;Pseudovibrio FO-BEG1	_GAP_||PF00005||_GAP_	_GAP_||ABC transporter||_GAP_			ABC	sugar (ribose?)	3	0	94	8
contig_2697_1_545_+	545	545	rlg:Rleg_6916	transcriptional regulator, histidine utilization repressor, GntR family; K05836 GntR family transcriptional regulator, histidine utilization repressor		K05836	GntR family transcriptional regulator, histidine utilization repressor			C6B791					YY3DRAFT_01619-YY3DRAFT_scaffold_146.147	51.72	histidine utilization repressor, proteobacterial		Rhizobium STM 6155	796891	Bacteria	Alphaproteobacteria	50822	131	0.8287	32	32	Bacteria;Proteobacteria;Alphaproteobacteria;Rhizobiales;Rhizobiaceae;Rhizobium;Rhizobium STM 6155	PF00392||PF07702	Bacterial regulatory proteins, gntR family||UTRA domain						0	138	0
contig_2743_1046_1495_+	1574	450	sit:TM1040_0849	extracellular solute-binding protein; K05813 sn-glycerol 3-phosphate transport system substrate-binding protein	sit02010	K05813	sn-glycerol 3-phosphate transport system substrate-binding protein	ABC transporters		Q1GID4					gi126727987-NZ_AAXZ01000022	75.68	ABC transporter, substrate-binding protein, family 1	CAM_CRCL_4002274	Rhodobacteraceae bacterium HTCC2150	388401	Bacteria	Alphaproteobacteria	50822	131	0.7792	7	7	Bacteria;Proteobacteria;Alphaproteobacteria;Rhodobacterales;Rhodobacteraceae;Ruegeria;Ruegeria TM1040	PF13416||_GAP_	PF13416||_GAP_						0	136	0
contig_2743_192_1013_+	1574	822	sit:TM1040_0849	extracellular solute-binding protein; K05813 sn-glycerol 3-phosphate transport system substrate-binding protein	sit02010	K05813	sn-glycerol 3-phosphate transport system substrate-binding protein	ABC transporters		Q1GID4					TM1040_0849-NC_008044	71.84	extracellular solute-binding protein; K05813 sn-glycerol 3-phosphate transport system substrate-binding protein	CAM_CRCL_14569815	Ruegeria TM1040	292414	Bacteria	Alphaproteobacteria	50822	131	0.5717	8	7	Bacteria;Proteobacteria;Alphaproteobacteria;Rhodobacterales;Rhodobacteraceae;Ruegeria;Ruegeria TM1040	_GAP_||PF13416	_GAP_||PF13416						0	222	16
contig_2799_1_562_+	1669	562	sil:SPO0457	hypothetical protein						Q5LW85					gi498128307-NZ_AEYW01000016	53.64	hypothetical protein		Ruegeria TW15	981384	Bacteria	Alphaproteobacteria	50822	131	0.9204	3	3	Bacteria;Proteobacteria;Alphaproteobacteria;Rhodobacterales;Rhodobacteraceae;Rhodobacter;Rhodobacter SW2								1	115	0
contig_28292_83_641_-	641	559	sil:SPOA0248	hypothetical protein						Q5LKY1					gi114704424-NZ_AATP01000001	50.38	hypothetical protein	CAM_CRCL_24935	Fulvimarina pelagi HTCC2506	314231	Bacteria	Alphaproteobacteria	50822	131	0.5175	5	5	Bacteria;Proteobacteria;Alphaproteobacteria;Rhodobacterales;Rhodobacteraceae;Roseibium;Roseibium TrichSKD4	_GAP_||PF03928	_GAP_||Domain of unknown function (DUF336)						0	5	98
contig_2842_1_1016_+	1325	1016	ccr:CC_0119 || ccs:CCNA_00118	TPR domain-containing protein || porphyrin biosynthesis protein						B8GXK9					CCNA_00118-NC_011916	32.51	porphyrin biosynthesis protein	CAM_CRCL_32790	Caulobacter crescentus NA1000	565050	Bacteria	Alphaproteobacteria	50822	131	1	1	1	Bacteria;Proteobacteria;Alphaproteobacteria;Caulobacterales;Caulobacteraceae;Caulobacter;Caulobacter crescentus NA1000	_GAP_||PF13174||_GAP_||PF13414||PF13432	_GAP_||Tetratricopeptide repeat||_GAP_||PF13414||PF13432						0	132	0
contig_2857_1_888_-	1408	888	azo:azo2846	sigma-54-dependent transcriptional regulator						A1K9F7					CAMPEP_0201030812-CAMNT_0047267413	33.44			Thalassiosira miniscula, Strain CCMP1093	385413	Bacteria	Alphaproteobacteria	50822	131	0.6269	3	3	Bacteria;Proteobacteria;Alphaproteobacteria;Rhodobacterales;Rhodobacteraceae;Celeribacter;Celeribacter baekdonensis B30	_GAP_||PF00158||_GAP_	_GAP_||Sigma-54 interaction domain||_GAP_						0	150	10
contig_2885_1_1020_+	1594	1020	apb:SAR116_0705	putative transport protein						D5BRQ1					HIMB100_00004930-GCA_000238815.2_contig4	70.43	ABC-type long-chain fatty acid transport system, fused permease and ATPase component		SAR116 cluster alpha proteobacterium HIMB100	909943	Bacteria	Alphaproteobacteria	50822	131	0.716	4	4	Bacteria;Proteobacteria;Alphaproteobacteria;Rhodobacterales;Rhodobacteraceae;Citreicella;Citreicella SE45	_GAP_||PF05992	_GAP_||SbmA/BacA-like family			PUP	peptide uptake	4	6	113	0
contig_2896_1225_1739_+	1740	515	atu:Atu0146	cysJ; sulfite reductase (NADPH) flavoprotein alpha-component; K00380 sulfite reductase (NADPH) flavoprotein alpha-component [EC:1.8.1.2]	atu01120||atu01100||atu00920	K00380	sulfite reductase (NADPH) flavoprotein alpha-component [EC:1.8.1.2]	Sulfur metabolism	1.8.1.2	A9CKN2					Atu0146-NC_003062	68.82	cysJ; sulfite reductase (NADPH) flavoprotein alpha-component; K00380 sulfite reductase (NADPH) flavoprotein alpha-component [EC:1.8.1.2]	CAM_CRCL_25422	Agrobacterium fabrum str. C58	176299	Bacteria	Alphaproteobacteria	50822	131	0.7322	5	5	Bacteria;Proteobacteria;Alphaproteobacteria;Rhizobiales;Rhizobiaceae;Agrobacterium;Agrobacterium ATCC 31749	PF00667||_GAP_||PF00175	FAD binding domain||_GAP_||Oxidoreductase NAD-binding domain						0	59	0
contig_2896_224_1006_+	1740	783	agr:AGROH133_03082	cysJ; sulfite reductase NADPH flavoprotein alpha-component (EC:1.8.1.2); K00380 sulfite reductase (NADPH) flavoprotein alpha-component [EC:1.8.1.2]	agr01120||agr01100||agr00920	K00380	sulfite reductase (NADPH) flavoprotein alpha-component [EC:1.8.1.2]	Sulfur metabolism	1.8.1.2						AGROH133_03082-NC_015183	62.64	cysJ; sulfite reductase [NADPH] flavoprotein subunit alpha (EC:1.8.1.2)	CAM_CRCL_25422	Agrobacterium H13-3	861208	Bacteria	Alphaproteobacteria	50822	131	0.9633	3	3	Bacteria;Proteobacteria;Alphaproteobacteria;Rhizobiales;Rhizobiaceae;Agrobacterium;Agrobacterium ATCC 31749	_GAP_||PF00258||PF00667	_GAP_||Flavodoxin||FAD binding domain						0	112	2
contig_29415_34_360_-	360	327													D521_1885-NC_020417	54.26	ABC transporter related protein		beta proteobacterium CB	543913	Bacteria	Alphaproteobacteria	50822	131	0.6861	54	54	Bacteria;Proteobacteria;Alphaproteobacteria;Rhizobiales;Rhizobiaceae;Rhizobium;Rhizobium STM 6155								0	0	66
contig_2941_1547_1994_+	1995	448	apb:SAR116_0849	hypothetical protein; K02390 flagellar hook protein FlgE	apb02040	K02390	flagellar hook protein FlgE	Flagellar assembly		D5BS45					IMCC14465_12940-GCA_000293845.1_IMCC14465_3	60.13	flagellar hook-basal body protein		alpha proteobacterium IMCC14465	1220535	Bacteria	Alphaproteobacteria	50822	131	0.8168	8	8	Bacteria;Proteobacteria;Alphaproteobacteria;Rhodobacterales;Rhodobacteraceae;Octadecabacter;Octadecabacter antarcticus 307	PF00460||_GAP_	Flagella basal body rod protein||_GAP_	TIGR03506	fagellar hook-basal body proteins				0	67	4
contig_304_1_576_+	636	576	apb:SAR116_1439	taurine transport system periplasmic protein (EC:2.7.1.-); K02051 sulfonate/nitrate/taurine transport system substrate-binding protein	apb02010	K02051	NitT/TauT family transport system substrate-binding protein			D5BTT5					SAR116_1439-NC_014010	57.65	taurine transport system periplasmic protein (EC:2.7.1.-); K02051 sulfonate/nitrate/taurine transport system substrate-binding protein	CAM_CRCL_2818	Puniceispirillum marinum IMCC1322	488538	Bacteria	Alphaproteobacteria	50822	131	0.9725	2	2	Bacteria;Proteobacteria;Alphaproteobacteria;SAR116;SAR116_X;SAR116_XX;Puniceispirillum marinum IMCC1322	PF09084||_GAP_	NMT1/THI5 like||_GAP_			ABC (binding protein)	nitrate/sulfonate/taurine	2	0	76	0
contig_3056_1_923_+	923	923													PJE062_2831-NZ_DS996807	68.85	twin-arginine translocation pathway signal	CAM_CRCL_15072	Pseudovibrio JE062	439495	Bacteria	Alphaproteobacteria	50822	131	0.7462	19	19	Bacteria;Proteobacteria;Alphaproteobacteria;Rhodobacterales;Rhodobacteraceae;Roseobacter;Roseobacter AzwK-3b	PF13458	PF13458						0	158	1
contig_3142_1_394_+	1215	394													gi114771869-NZ_AATR01000011	79.2	trap dicarboxylate transporter- dctp subunit	CAM_CRCL_4004304	Rhodobacterales bacterium HTCC2255	367336	Bacteria	Alphaproteobacteria	50822	131	0.7601	14	14	Bacteria;Proteobacteria;Alphaproteobacteria;Rhodobacterales;Rhodobacteraceae;Roseobacter;Roseobacter AzwK-3b	PF03480	Bacterial extracellular solute-binding protein, family 7			TRAP-T		2	0	45	6
contig_3142_419_1042_+	1215	624	jan:Jann_3517	TRAP dicarboxylate transporter-DctP subunit						Q28LH8					gi114771869-NZ_AATR01000011	83.94	trap dicarboxylate transporter- dctp subunit	CAM_CRCL_4004304	Rhodobacterales bacterium HTCC2255	367336	Bacteria	Alphaproteobacteria	50822	131	1	1	1	Bacteria;Proteobacteria;Alphaproteobacteria;Misc. Alphaproteobacteria;Environmental Alphaproteobacteria;Uncultured Alphaproteobacteria;Rhodobacterales bacterium HTCC2255	PF03480||_GAP_	Bacterial extracellular solute-binding protein, family 7 ||_GAP_			TRAP-T		2	0	85	10
contig_3180_1_576_+	1084	576	rce:RC1_1987	cbs; cystathionine beta-synthase (EC:4.2.1.22); K01697 cystathionine beta-synthase [EC:4.2.1.22]	rce00270||rce00260||rce01100	K01697	cystathionine beta-synthase [EC:4.2.1.22]	Glycine, serine and threonine metabolism || Cysteine and methionine metabolism || Biosynthesis of amino acids	4.2.1.22	B6INW1					gi159181346-ABHC01000003	55.32	Pyridoxal-phosphate dependent enzyme	CAM_CRCL_9330	alpha proteobacterium BAL199	331869	Bacteria	Alphaproteobacteria	50822	131	1	1	1	Bacteria;Proteobacteria;Alphaproteobacteria;Rhodospirillales;Rhodospirillaceae;Thalassobaculum;alpha proteobacterium BAL199	_GAP_||PF00571	_GAP_||CBS domain						0	84	1
contig_3180_595_1029_+	1084	435													P24_08254-GCA_000299935.1_contig8	77.52	cystathionine gamma-synthase		Oceanibaculum indicum P24	1207063	Bacteria	Alphaproteobacteria	50822	131	0.8197	3	3	Bacteria;Proteobacteria;Alphaproteobacteria;Rhodospirillales;Rhodospirillaceae;Oceanibaculum;Oceanibaculum indicum P24	PF01053	Cys/Met metabolism PLP-dependent enzyme						0	90	1
contig_3216_230_958_+	1011	729	jan:Jann_4084	hypothetical protein						Q28JW1					Jann_4084-NC_007802	75.76	hypothetical protein	CAM_CRCL_33259193	Jannaschia CCS1	290400	Bacteria	Alphaproteobacteria	50822	131	0.9403	2	2	Bacteria;Proteobacteria;Alphaproteobacteria;Rhodobacterales;Rhodobacteraceae;Jannaschia;Jannaschia CCS1	PF03737||_GAP_	Demethylmenaquinone methyltransferase||_GAP_						0	58	0
contig_3223_1_521_+	582	521	mno:Mnod_0809	TetR family transcriptional regulator						B8IGD9					Mnod_0809-NC_011894	57.56	transcriptional regulator, TetR family	CAM_CRCL_46625	Methylobacterium nodulans ORS 2060	460265	Bacteria	Alphaproteobacteria	50822	131	0.7577	11	11	Bacteria;Proteobacteria;Alphaproteobacteria;Rhizobiales;Bradyrhizobiaceae;Bradyrhizobium;Bradyrhizobium Cp5.3	PF00440||_GAP_	Bacterial regulatory proteins, tetR family||_GAP_						0	133	5
contig_3259_54_242_+	1015	189									KOG4663	Cytochrome b	Energy production and conversion	METABOLISM	HIMB114_0240-NZ_GG704932	50	cytochrome b	CAM_CRCL_2	alpha proteobacterium HIMB114	684719	Bacteria	Alphaproteobacteria	50822	131	0.6211	9	8	Bacteria;Proteobacteria;Alphaproteobacteria;SAR11 clade;Surface 1;Pelagibacter;Pelagibacter HTCC7211								1	52	0
contig_3276_1085_1681_+	2305	597	sit:TM1040_3487	dihydroxy-acid dehydratase (EC:4.2.1.9); K01687 dihydroxy-acid dehydratase [EC:4.2.1.9]	sit01110||sit00290||sit00770||sit01100	K01687	dihydroxy-acid dehydratase [EC:4.2.1.9]	Valine, leucine and isoleucine biosynthesis || Pantothenate and CoA biosynthesis || 2-Oxocarboxylic acid metabolism || Biosynthesis of amino acids	4.2.1.9	Q1GLK7					TM1040_3487-NC_008043	77.16	dihydroxy-acid dehydratase (EC:4.2.1.9); K01687 dihydroxy-acid dehydratase [EC:4.2.1.9]	CAM_CRCL_32346691	Ruegeria TM1040	292414	Bacteria	Alphaproteobacteria	50822	131	0.9082	9	9	Bacteria;Proteobacteria;Alphaproteobacteria;Rhodobacterales;Rhodobacteraceae;Ruegeria;Ruegeria TM1040	PF00920	Dehydratase family						0	86	2
contig_3276_1_1004_+	2305	1004	sit:TM1040_3487	dihydroxy-acid dehydratase (EC:4.2.1.9); K01687 dihydroxy-acid dehydratase [EC:4.2.1.9]	sit01110||sit00290||sit00770||sit01100	K01687	dihydroxy-acid dehydratase [EC:4.2.1.9]	Valine, leucine and isoleucine biosynthesis || Pantothenate and CoA biosynthesis || 2-Oxocarboxylic acid metabolism || Biosynthesis of amino acids	4.2.1.9	Q1GLK7					SL1157_A0157-NZ_GG704595	86.75	dihydroxy-acid dehydratase	CAM_CRCL_4004185	Silicibacter lacuscaerulensis ITI-1157	644107	Bacteria	Alphaproteobacteria	50822	131	0.9082	9	9	Bacteria;Proteobacteria;Alphaproteobacteria;Rhodobacterales;Rhodobacteraceae;Ruegeria;Ruegeria TM1040	PF00920	Dehydratase family						0	138	0
contig_3296_1069_1398_+	1525	330	rde:RD1_0175	ABC transporter, substrate-binding protein, putative; K02055 putative spermidine/putrescine transport system substrate-binding protein		K02055	putative spermidine/putrescine transport system substrate-binding protein			Q16DN7					gi126738602-NZ_AAYC01000004	80.56	ABC transporter, substrate-binding protein, putative	CAM_CRCL_2606	Roseobacter SK209-2-6	388739	Bacteria	Alphaproteobacteria	50822	131	0.8015	8	8	Bacteria;Proteobacteria;Alphaproteobacteria;Rhodobacterales;Rhodobacteraceae;Roseobacter;Roseobacter SK209-2-6	PF13416||_GAP_	PF13416||_GAP_			ABC (binding protein)	spermidine/putrescine	2	0	170	3
contig_3296_299_1042_+	1525	744	rli:RLO149_c043800	hypothetical protein											gi498128410-NZ_AEYW01000018	73.39	spermidine/putrescine ABC transporter substrate-binding protein		Ruegeria TW15	981384	Bacteria	Alphaproteobacteria	50822	131	0.7902	7	7	Bacteria;Proteobacteria;Alphaproteobacteria;Rhodobacterales;Rhodobacteraceae;Roseobacter;Roseobacter SK209-2-6	_GAP_||PF13416	_GAP_||PF13416						0	480	16
contig_3331_1_448_-	2212	448	oan:Oant_0284	glycine oxidase ThiO; K03153 glycine oxidase [EC:1.4.3.19]	oan00730	K03153	glycine oxidase [EC:1.4.3.19]	Thiamine metabolism	1.4.3.19	A6WVL1					gi83943268-NZ_AALV01000003	63.19	glycine oxidase ThiO	CAM_CRCL_27048138	Sulfitobacter EE-36	52598	Bacteria	Alphaproteobacteria	50822	131	0.9725	2	2	Bacteria;Proteobacteria;Alphaproteobacteria;Rhodobacterales;Rhodobacteraceae;Sulfitobacter;Sulfitobacter EE-36	PF01266	FAD dependent oxidoreductase						0	74	6
contig_3360_153_962_+	962	810	cvi:CV_3395	cysB2; cystathionine beta-synthase (EC:4.2.1.22); K01697 cystathionine beta-synthase [EC:4.2.1.22]	cvi00260||cvi01100||cvi00270	K01697	cystathionine beta-synthase [EC:4.2.1.22]	Glycine, serine and threonine metabolism || Cysteine and methionine metabolism || Biosynthesis of amino acids	4.2.1.22	Q7NSM6					gi159181346-ABHC01000003	66.04	Pyridoxal-phosphate dependent enzyme	CAM_CRCL_9330	alpha proteobacterium BAL199	331869	Bacteria	Alphaproteobacteria	50822	131	1	1	1	Bacteria;Proteobacteria;Alphaproteobacteria;Rhodospirillales;Rhodospirillaceae;Thalassobaculum;alpha proteobacterium BAL199	PF00291	Pyridoxal-phosphate dependent enzyme						0	140	6
contig_3397_1070_1604_+	1605	535													PJE062_1777-NZ_DS996805	62.15	ribose ABC transporter, ATP-binding protein RbsA	CAM_CRCL_4002626	Pseudovibrio JE062	439495	Bacteria	Alphaproteobacteria	50822	131	1	1	1	Bacteria;Proteobacteria;Alphaproteobacteria;Rhodobacterales;Rhodobacteraceae;Pseudovibrio;Pseudovibrio JE062	_GAP_||PF00005	_GAP_||ABC transporter			ABC	sugar (ribose?)	3	0	77	0
contig_3397_492_1007_+	1605	516													PJE062_1777-NZ_DS996805	63.69	ribose ABC transporter, ATP-binding protein RbsA	CAM_CRCL_4002626	Pseudovibrio JE062	439495	Bacteria	Alphaproteobacteria	50822	131	1	1	1	Bacteria;Proteobacteria;Alphaproteobacteria;Rhodobacterales;Rhodobacteraceae;Pseudovibrio;Pseudovibrio JE062	PF00005	ABC transporter			ABC		2	0	103	16
contig_3445_1_878_+	878	878													RB2083_1335-NZ_DS995276	87.67	polyamine ABC transporter, ATP-binding protein	CAM_CRCL_7743	Rhodobacteraceae bacterium HTCC2083	314270	Bacteria	Alphaproteobacteria	50822	131	0.8142	22	21	Bacteria;Proteobacteria;Alphaproteobacteria;Rhodobacterales;Rhodobacteraceae;Roseobacter;Roseobacter AzwK-3b	PF00005||_GAP_	ABC transporter||_GAP_	TIGR01187	polyamine ABC transporter, ATP-binding protein	ABC		3	0	95	2
contig_3454_1_1110_+	1498	1110													gi496316502-NZ_CAFI01000014	78.08	urocanate hydratase		Bradyrhizobium ORS 375	566679	Bacteria	Alphaproteobacteria	50822	131	0.6956	99	99	Bacteria;Proteobacteria;Alphaproteobacteria;Rhizobiales;Bradyrhizobiaceae;Bradyrhizobium;Bradyrhizobium BTAi1	PF01175	Urocanase	TIGR01228	urocanate hydratase				0	210	13
contig_3497_1_854_+	969	854	pin:Ping_3702	Sel1-like repeat-containing serine/threonine protein kinase; K07126		K07126				A1T0W3					TR2A62_0536-NZ_GG697169	50	Sel1 repeat protein	CAM_CRCL_21338	Thalassiobium R2A62	633131	Bacteria	Alphaproteobacteria	50822	131	0.7893	4	3	Bacteria;Proteobacteria;Alphaproteobacteria;Rhodobacterales;Rhodobacteraceae;Loktanella;Thalassiobium R2A62	_GAP_||PF08238||_GAP_	_GAP_||Sel1 repeat||_GAP_						0	284	2
contig_3515_1_658_+	930	658													gi159181345-ABHC01000003	71.5	Cys/Met metabolism PLP-dependent enzyme	CAM_CRCL_4008611	alpha proteobacterium BAL199	331869	Bacteria	Alphaproteobacteria	50822	131	1	1	1	Bacteria;Proteobacteria;Alphaproteobacteria;Rhodospirillales;Rhodospirillaceae;Thalassobaculum;alpha proteobacterium BAL199	PF01053	Cys/Met metabolism PLP-dependent enzyme						0	53	6
contig_3530_325_890_+	890	566													ORF0311-A76E13DRAFT_NODE	71.12	IMG gene_oid=2236435916		gamma proteobacterium SCGC AAA076-E13	1007116	Bacteria	Alphaproteobacteria	50822	131	0.7893	2	2	Bacteria;Proteobacteria;Alphaproteobacteria;Rhizobiales;Phyllobacteriaceae;Ahrensia;Ahrensia R2A130	PF00171	Aldehyde dehydrogenase family						0	69	0
contig_35380_436_642_+	10808	207													pSD20_p44-NC_004929	50	rb143	CAM_CRCL_14549184	Ruegeria PR1b	185588	Bacteria	Alphaproteobacteria	50822	131	1	1	1	Bacteria;Proteobacteria;Alphaproteobacteria;Rhodobacterales;Rhodobacteraceae;Ruegeria;Ruegeria PR1b								0	0	349
contig_35523_980_1141_+	11551	162													gi490395178-NZ_AFBX01000337	55.56	hypothetical protein		Azospirillum amazonense Y2	1003237	Bacteria	Alphaproteobacteria	50822	131	1	1	1	Bacteria;Proteobacteria;Alphaproteobacteria;Rhodospirillales;Rhodospirillaceae;Azospirillum;Azospirillum amazonense Y2								0	0	168
contig_3554_1_277_+	1092	277	rsp:RSP_2310 || rsh:Rsph17029_0984 || rsk:RSKD131_0632	groES; co-chaperonin GroES; K04078 chaperonin GroES || groES; co-chaperonin GroES; K04078 chaperonin GroES || groES; co-chaperonin GroES; K04078 chaperonin GroES		K04078	chaperonin GroES			B9KPJ9					gi126733620-NZ_AAYB01000001	89.01	chaperonin GroS	CAM_CRCL_560	Roseobacter CCS2	391593	Bacteria	Alphaproteobacteria	50822	131	0.6305	7	7	Bacteria;Proteobacteria;Alphaproteobacteria;Rhodobacterales;Rhodobacteraceae;Rhodobacter;Rhodobacter sphaeroides ATCC 17025	PF00166	Chaperonin 10 Kd subunit						0	81	7
contig_3554_329_1072_+	1092	744													gi83854816-NZ_AALZ01000001	92.48	chaperonin GroL	CAM_CRCL_32430158	Sulfitobacter NAS-14.1	314267	Bacteria	Alphaproteobacteria	50822	131	0.8339	31	30	Bacteria;Proteobacteria;Alphaproteobacteria;Rhodobacterales;Rhodobacteraceae;Roseobacter;Roseobacter AzwK-3b	PF00118	TCP-1/cpn60 chaperonin family						0	152	26
contig_3611_1_550_+	550	550													gi126740251-NZ_AAYC01000011	69.71	oxoglutarate dehydrogenase (succinyl-transferring)	CAM_CRCL_2479	Roseobacter SK209-2-6	388739	Bacteria	Alphaproteobacteria	50822	131	0.7936	12	12	Bacteria;Proteobacteria;Alphaproteobacteria;Rhizobiales;Bradyrhizobiaceae;Bradyrhizobium;Bradyrhizobium WSM3983	_GAP_||PF00456||_GAP_	_GAP_||Transketolase, thiamine diphosphate binding domain||_GAP_						0	85	6
contig_3623_1_328_+	1048	328	azl:AZL_b03720	aminotransferase						D3P2L5					SinteDRAFT_00045640-SinteDRAFT_scaffold_67.68	56.48	Adenosylmethionine-8-amino-7-oxononanoate aminotransferase		Sinorhizobium terangae WSM1721	1041159	Bacteria	Alphaproteobacteria	50822	131	0.884	3	3	Bacteria;Proteobacteria;Alphaproteobacteria;Rhizobiales;Rhizobiaceae;Ensifer;Sinorhizobium TW10	PF00202	Aminotransferase class-III						0	80	3
contig_3623_334_1047_+	1048	714	rlt:Rleg2_4959	hypothetical protein						B6A0Q5					TH3_15859-GCA_000300235.1_contig16	60.18	aminotransferase, class III		Thalassospira xiamenensis M-5 = DSM 17429	1123366	Bacteria	Alphaproteobacteria	50822	131	1	1	1	Bacteria;Proteobacteria;Alphaproteobacteria;Rhodospirillales;Rhodospirillaceae;Thalassospira;Thalassospira xiamenensis M-5 = DSM 17429	PF00202||_GAP_	Aminotransferase class-III||_GAP_						0	82	8
contig_37005_424_855_-	1563	432	atu:Atu4029	gluconolactonase precursor; K01053 gluconolactonase [EC:3.1.1.17]	atu01120||atu01110||atu00030||atu01100||atu00930||atu00053	K01053	gluconolactonase [EC:3.1.1.17]	Pentose phosphate pathway || Ascorbate and aldarate metabolism || Caprolactam degradation || Carbon metabolism || Degradation of aromatic compounds	3.1.1.17	Q7CTW5					gi493357183-NZ_AECL01000046	48.39	gluconolactonase		Agrobacterium ATCC 31749	82789	Bacteria	Alphaproteobacteria	50822	131	0.8823	6	6	Bacteria;Proteobacteria;Alphaproteobacteria;Rhizobiales;Rhizobiaceae;Agrobacterium;Agrobacterium ATCC 31749	PF08450	SMP-30/Gluconolaconase/LRE-like region						0	1	540
contig_37005_984_1562_-	1563	579	sil:SPOA0241	gluconolactonase, putative; K01053 gluconolactonase [EC:3.1.1.17]	sil00930||sil00030||sil01100||sil00053||sil01110||sil01120	K01053	gluconolactonase [EC:3.1.1.17]	Pentose phosphate pathway || Ascorbate and aldarate metabolism || Caprolactam degradation || Carbon metabolism || Degradation of aromatic compounds	3.1.1.17	Q5LKY8					SPOA0241-NC_006569	34.4	gluconolactonase, putative; K01053 gluconolactonase [EC:3.1.1.17]	CAM_CRCL_14090719	Ruegeria pomeroyi DSS-3	246200	Bacteria	Alphaproteobacteria	50822	131	0.592	6	6	Bacteria;Proteobacteria;Alphaproteobacteria;Rhodobacterales;Rhodobacteraceae;Roseobacter;Roseobacter litoralis Och 149								0	5	767
contig_37039_440_1039_+	1673	600													gi497824716-NZ_AFPM01000102	42.08	glutamate dehydrogenase		Oceanicola S124	1042378	Bacteria	Alphaproteobacteria	50822	131	0.4587	7	7	Bacteria;Proteobacteria;Alphaproteobacteria;Rhodobacterales;Rhodobacteraceae;Oceanicola;Oceanicola S124								0	18	186
contig_37065_66_1013_+	1257	948													YY3DRAFT_06063-YY3DRAFT_scaffold_146.147	43.65	Gluconolactonase		Rhizobium STM 6155	796891	Bacteria	Alphaproteobacteria	50822	131	0.9047	36	35	Bacteria;Proteobacteria;Alphaproteobacteria;Rhizobiales;Rhizobiaceae;Rhizobium;Rhizobium STM 6155	_GAP_||PF08450	_GAP_||SMP-30/Gluconolaconase/LRE-like region						0	7	1587
contig_37500_1_923_-	998	923	kra:Krad_1491	gluconolactonase (EC:3.1.1.17); K01053 gluconolactonase [EC:3.1.1.17]	kra00930||kra00053||kra00030||kra01110||kra01120||kra01100	K01053	gluconolactonase [EC:3.1.1.17]	Pentose phosphate pathway || Ascorbate and aldarate metabolism || Caprolactam degradation || Carbon metabolism || Degradation of aromatic compounds	3.1.1.17	A6W840					PMI41_04704-GCA_000282595.1_PMI41_contig_103.103	39.46	gluconolactonase		Phyllobacterium YR531	1144343	Bacteria	Alphaproteobacteria	50822	131	0.6676	17	17	Bacteria;Proteobacteria;Alphaproteobacteria;Rhizobiales;Rhizobiaceae;Ensifer;Sinorhizobium TW10	PF08450	SMP-30/Gluconolaconase/LRE-like region						0	11	243
contig_3784_224_942_+	942	719													GPB2148_320-NZ_DS999238	69.2	conserved hypothetical protein	CAM_CRCL_3497	Marine gamma proteobacterium HTCC2148	247634	Bacteria	Alphaproteobacteria	50822	131	0.7893	2	2	Bacteria;Proteobacteria;Alphaproteobacteria;Rhodobacterales;Rhodobacteraceae;Octadecabacter;Octadecabacter antarcticus 307								0	108	0
contig_38085_18_995_-	1251	978	tsa:AciPR4_2798	beta-lactamase						E8V3F8					A3AKDRAFT_00431-A3AKDRAFT_scaffold_163.164	30.74	Beta-lactamase class C and other penicillin binding proteins		Bradyrhizobium elkanii USDA 94	398524	Bacteria	Alphaproteobacteria	50822	131	1	1	1	Bacteria;Proteobacteria;Alphaproteobacteria;Rhizobiales;Bradyrhizobiaceae;Bradyrhizobium;Bradyrhizobium elkanii USDA 94								0	0	137
contig_38089_1_770_+	770	770	rpc:RPC_3427	adk; adenylate kinase (EC:2.7.4.3); K00939 adenylate kinase [EC:2.7.4.3]	rpc01100||rpc01110||rpc00230	K00939	adenylate kinase [EC:2.7.4.3]	Purine metabolism	2.7.4.3	Q211G9					R2A130_1725-NZ_AEEB01000022	32.29	ATP-binding protein of dipeptide ABC transporter	CAM_CRCL_300	Ahrensia R2A130	744979	Bacteria	Alphaproteobacteria	50822	131	0.4509	4	4	Bacteria;Proteobacteria;Alphaproteobacteria;Rhizobiales;Bradyrhizobiaceae;Rhodopseudomonas;Rhodopseudomonas palustris BisB18								0	0	185
contig_38510_1_827_-	827	827													COCOR_03474-NC_017030	43.73	adhA; alcohol dehydrogenase		Corallococcus coralloides DSM 2259	1144275	Bacteria	Alphaproteobacteria	50822	131	0.4361	9	9	Bacteria;Proteobacteria;Alphaproteobacteria;Caulobacterales;Caulobacteraceae;Brevundimonas;Brevundimonas BAL3	PF08240||_GAP_||PF00107	Alcohol dehydrogenase GroES-like domain||_GAP_||Zinc-binding dehydrogenase						0	1	90
contig_40571_517_966_-	1380	450	pub:SAR11_1265	putative aminomethyltransferase protein (EC:2.1.2.10); K00605 aminomethyltransferase [EC:2.1.2.10]	pub00910||pub00260||pub01100||pub00670	K00605	aminomethyltransferase [EC:2.1.2.10]	Glycine, serine and threonine metabolism || One carbon pool by folate || Carbon metabolism	2.1.2.10	Q4FL69					PB7211_1405-NZ_DS995298	65.77	aminomethyltransferase, glycin cleavage system T protein	CAM_CRCL_33251547	Pelagibacter HTCC7211	439493	Bacteria	Alphaproteobacteria	50822	131	0.8992	4	4	Bacteria;Proteobacteria;Alphaproteobacteria;SAR11 clade;Surface 1;Pelagibacter;Pelagibacter HTCC7211	PF01571	Aminomethyltransferase folate-binding domain						0	7	118
contig_40571_993_1379_-	1380	387													HIMB5_00009100-NC_018643	63.3	glycine cleavage system T-protein-like,folate-binding protein, aminomethyltransferase-like protein		alpha proteobacterium HIMB5	859653	Bacteria	Alphaproteobacteria	50822	131	0.6666	8	8	Bacteria;Proteobacteria;Alphaproteobacteria;SAR11 clade;Surface 1;Pelagibacter;Pelagibacter HTCC7211								0	4	151
contig_4085_136_1002_+	1321	867	rli:RLO149_c033370	bztA; glutamate/glutamine/aspartate/asparagine-binding protein BztA; K09969 general L-amino acid transport system substrate-binding protein	rli02010	K09969	general L-amino acid transport system substrate-binding protein	ABC transporters							gi114771237-NZ_AATR01000007	71.76	lysine-arginine-ornithine-binding periplasmic protein	CAM_CRCL_3107	Rhodobacterales bacterium HTCC2255	367336	Bacteria	Alphaproteobacteria	50822	131	0.7359	30	30	Bacteria;Proteobacteria;Alphaproteobacteria;Rhodobacterales;Rhodobacteraceae;Roseobacter;Roseobacter AzwK-3b	_GAP_||PF00497||_GAP_	_GAP_||Bacterial extracellular solute-binding proteins, family 3||_GAP_			ABC (binding protein)	amino acid (glutamine/glutamate/aspartate?)	2	0	2325	79
contig_40861_127_809_-	809	683	smd:Smed_5316	gluconolactonase (EC:3.1.1.17); K01053 gluconolactonase [EC:3.1.1.17]	smd01120||smd00053||smd01100||smd00030||smd00930||smd01110	K01053	gluconolactonase [EC:3.1.1.17]	Pentose phosphate pathway || Ascorbate and aldarate metabolism || Caprolactam degradation || Carbon metabolism || Degradation of aromatic compounds	3.1.1.17	A6UKA9					TH2_13714-GCA_000300275.1_contig7	42.79	gluconolactonase		Thalassospira profundimaris WP0211	1177928	Bacteria	Alphaproteobacteria	50822	131	0.9126	22	22	Bacteria;Proteobacteria;Alphaproteobacteria;Rhizobiales;Rhizobiaceae;Rhizobium;Rhizobium etli CIAT 894	PF08450	SMP-30/Gluconolaconase/LRE-like region						0	6	152
contig_4114_1_730_+	841	730	pgv:SL003B_3001	CheY-like response regulator		K02483	two-component system, OmpR family, response regulator								SSPSH_01868-GCA_000215955.2_Contig6	55.88	chemotaxis protein CheY		Salinisphaera shabanensis E1L3A	1033802	Bacteria	Alphaproteobacteria	50822	131	0.7389	10	9	Bacteria;Proteobacteria;Alphaproteobacteria;Rhodobacterales;Rhodobacteraceae;Pseudovibrio;Pseudovibrio FO-BEG1	PF00072||_GAP_||PF00486	Response regulator receiver domain||_GAP_||Transcriptional regulatory protein, C terminal						0	88	0
contig_4169_172_738_+	811	567													MesW2561DRAFT_00014360-MesW2561DRAFT_scaffold_110.111	65.34	Secreted and surface protein containing fasciclin-like repeats		Mesorhizobium WSM2561	1040985	Bacteria	Alphaproteobacteria	50822	131	0.9393	13	13	Bacteria;Proteobacteria;Alphaproteobacteria;Rhizobiales;Phyllobacteriaceae;Mesorhizobium;Mesorhizobium WSM2561	_GAP_||PF02469	_GAP_||Fasciclin domain						1	1620	43
contig_4188_1105_1350_+	1386	246	dsh:Dshi_1522	putative periplasmic ligand-binding protein; K01999 branched-chain amino acid transport system substrate-binding protein	dsh02010	K01999	branched-chain amino acid transport system substrate-binding protein	ABC transporters		A8LK65					R2A130_0688-NZ_AEEB01000003	62.03	branched chain amino acid ABC transporter periplasmic substrate-binding protein	CAM_CRCL_2201	Ahrensia R2A130	744979	Bacteria	Alphaproteobacteria	50822	131	1	1	1	Bacteria;Proteobacteria;Alphaproteobacteria;Rhizobiales;Phyllobacteriaceae;Ahrensia;Ahrensia R2A130					ABC (binding protein)	branched-chain amino acid	2	0	400	4
contig_4188_152_1027_+	1386	876	jan:Jann_2165	extracellular ligand-binding receptor						Q28QD0					R2A130_0688-NZ_AEEB01000003	70.82	branched chain amino acid ABC transporter periplasmic substrate-binding protein	CAM_CRCL_2201	Ahrensia R2A130	744979	Bacteria	Alphaproteobacteria	50822	131	0.7525	21	21	Bacteria;Proteobacteria;Alphaproteobacteria;Rhodobacterales;Rhodobacteraceae;Rhodobacter;Rhodobacter SW2	_GAP_||PF01094	_GAP_||Receptor family ligand binding region			ABC (binding protein)	branched-chain amino acid	2	1	393	6
contig_42522_97_512_+	512	416	bra:BRADO2704	putative signal peptide						A4YRJ1					BRADO2704-NC_009445	29.47	putative signal peptide	CAM_CRCL_14106	Bradyrhizobium ORS 278	114615	Bacteria	Alphaproteobacteria	50822	131	1	1	1	Bacteria;Proteobacteria;Alphaproteobacteria;Rhizobiales;Bradyrhizobiaceae;Bradyrhizobium;Bradyrhizobium ORS 278								0	2	94
contig_4288_1_256_+	589	256	las:CLIBASIA_04610	isopentenyl pyrophosphate isomerase (EC:5.3.3.2); K01823 isopentenyl-diphosphate delta-isomerase [EC:5.3.3.2]	las01110||las01100||las00900	K01823	isopentenyl-diphosphate delta-isomerase [EC:5.3.3.2]	Terpenoid backbone biosynthesis	5.3.3.2	C6XGJ0					CLIBASIA_04610-NC_012985	56.25	isopentenyl pyrophosphate isomerase (EC:5.3.3.2); K01823 isopentenyl-diphosphate delta-isomerase [EC:5.3.3.2]	CAM_CRCL_32552103	Liberibacter asiaticus str. psy62	537021	Bacteria	Alphaproteobacteria	50822	131	0.8411	3	3	Bacteria;Proteobacteria;Alphaproteobacteria;Rhizobiales;Liberbacter_Family;Liberibacter;Liberibacter asiaticus str. psy62	PF01070	FMN-dependent dehydrogenase						0	225	0
contig_4304_17_480_+	480	464	eco:b1923 || ecj:JW1908 || ebw:BWG_1732 || ebd:ECBD_1719	fliC, ECK1922, flaF, H, hag, JW1908; flagellar filament structural protein (flagellin); K02406 flagellin || fliC; flagellar filament structural protein; K02406 flagellin || fliC; flagellin; K02406 flagellin || flagellin; K02406 flagellin	eco02040||eco02020	K02406	flagellin	Two-component system || Flagellar assembly || Plant-pathogen interaction || Salmonella infection || Legionellosis		P04949					b1923-NC_000913	35.1	fliC; flagellar filament structural protein (flagellin)	CAM_CRCL_33327744	Escherichia coli str. K-12 substr. MG1655	511145	Bacteria	Alphaproteobacteria	50822	131	0.8314	5	3	Bacteria;Proteobacteria;Alphaproteobacteria;Magnetococcales;Magnetococcaceae;Magnetococcus;Magnetococcus marinus MC-1	PF00669||_GAP_	Bacterial flagellin N-terminal helical region||_GAP_						0	761	4
contig_433_1_912_+	996	912													gi126733621-NZ_AAYB01000001	94.37	chaperonin GroL	CAM_CRCL_36	Roseobacter CCS2	391593	Bacteria	Alphaproteobacteria	50822	131	0.8498	23	23	Bacteria;Proteobacteria;Alphaproteobacteria;Rhodobacterales;Rhodobacteraceae;Roseobacter;Roseobacter CCS2	PF00118	TCP-1/cpn60 chaperonin family						0	226	25
contig_44054_1_628_-	628	628	sme:SMa0196	gluconolactonase (EC:3.1.1.17); K01053 gluconolactonase [EC:3.1.1.17]	sme00053||sme00030||sme01120||sme01110||sme01100||sme00930	K01053	gluconolactonase [EC:3.1.1.17]	Pentose phosphate pathway || Ascorbate and aldarate metabolism || Caprolactam degradation || Carbon metabolism || Degradation of aromatic compounds	3.1.1.17	Q926I2					B075DRAFT_02902-B075DRAFT_scaffold_46.47	49.44	Gluconolactonase		Sinorhizobium meliloti 4H41	1041151	Bacteria	Alphaproteobacteria	50822	131	0.8994	25	21	Bacteria;Proteobacteria;Alphaproteobacteria;Rhizobiales;Rhizobiaceae;Ensifer;Sinorhizobium meliloti CIAM1775	PF08450	SMP-30/Gluconolaconase/LRE-like region						0	4	95
contig_4418_71_598_+	890	528	bhe:BH13580	hypothetical protein						Q6G291					BH13580-NC_005956	66.27	hypothetical protein	CAM_CRCL_34142778	Bartonella henselae str. Houston-1	283166	Bacteria	Alphaproteobacteria	50822	131	0.8014	39	39	Bacteria;Proteobacteria;Alphaproteobacteria;Rhizobiales;Rhizobiaceae;Ensifer;Ensifer USDA 6670	PF08534	Redoxin						0	1241	28
contig_4431_1_835_+	835	835	swi:Swit_4611	TonB-dependent receptor, plug						A5VF83					Swit_4611-NC_009511	38.43	TonB-dependent receptor, plug	CAM_CRCL_6092273	Sphingomonas wittichii RW1	392499	Bacteria	Alphaproteobacteria	50822	131	0.8626	3	3	Bacteria;Proteobacteria;Alphaproteobacteria;Sphingomonadales;Sphingomonadaceae;Citromicrobium;Citromicrobium JLT1363	PF07715||_GAP_	TonB-dependent Receptor Plug Domain||_GAP_						0	520	2
contig_4501_1_548_+	631	548	rli:RLO149_c020930	hypothetical protein; K06971		K06971									gi114770242-NZ_AATR01000003	73.33	hypothetical protein	CAM_CRCL_12695	Rhodobacterales bacterium HTCC2255	367336	Bacteria	Alphaproteobacteria	50822	131	1	1	1	Bacteria;Proteobacteria;Alphaproteobacteria;Misc. Alphaproteobacteria;Environmental Alphaproteobacteria;Uncultured Alphaproteobacteria;Rhodobacterales bacterium HTCC2255	_GAP_||PF03437	_GAP_||BtpA family						0	57	6
contig_47060_500_691_+	748	192	rpc:RPC_4792	cytochrome c oxidase, subunit III; K02276 cytochrome c oxidase subunit III [EC:1.9.3.1]	rpc01100||rpc00190	K02276	cytochrome c oxidase subunit III [EC:1.9.3.1]	Oxidative phosphorylation	1.9.3.1	Q20X22	KOG4664	Cytochrome oxidase subunit III and related proteins	Energy production and conversion	METABOLISM	K288DRAFT_04352-K288DRAFT_scaffold00246.246	44.44	Heme/copper-type cytochrome/quinol oxidase, subunit 3		Bradyrhizobium Ai1a-2	196490	Bacteria	Alphaproteobacteria	50822	131	0.8672	5	5	Bacteria;Proteobacteria;Alphaproteobacteria;Rhizobiales;Bradyrhizobiaceae;Bradyrhizobium;Bradyrhizobium Ai1a-2	PF00510	Cytochrome c oxidase subunit III						1	7	297
contig_47522_1_361_+	452	361	smd:Smed_4447	beta-Ig-H3/fasciclin						A6UHW9					gi124004576-NZ_AAWS01000010	54.87	beta-Ig-H3/fasciclin	CAM_CRCL_16363	Microscilla marina ATCC 23134	313606	Bacteria	Alphaproteobacteria	50822	131	0.5215	19	18	Bacteria;Proteobacteria;Alphaproteobacteria;Rhizobiales;Rhizobiaceae;Ensifer;Ensifer USDA 6670	PF02469	Fasciclin domain						0	0	78
contig_4752_1_620_+	620	620	apb:SAR116_1391	glycine betaine ABC transporter substrate-binding protein (EC:1.1.1.103); K02002 glycine betaine/proline transport system substrate-binding protein	apb02010	K02002	glycine betaine/proline transport system substrate-binding protein	ABC transporters		D5BTN7					gi114769692-NZ_AATR01000002	64.9	substrate-binding region of ABC-type glycine betaine transport system	CAM_CRCL_2583	Rhodobacterales bacterium HTCC2255	367336	Bacteria	Alphaproteobacteria	50822	131	1	1	1	Bacteria;Proteobacteria;Alphaproteobacteria;Misc. Alphaproteobacteria;Environmental Alphaproteobacteria;Uncultured Alphaproteobacteria;Rhodobacterales bacterium HTCC2255	PF04069	Substrate binding domain of ABC-type glycine betaine transport system						0	150	2
contig_49729_1_412_-	482	412	azc:AZC_1374	flavin-containing monooxygenase; K00485 dimethylaniline monooxygenase (N-oxide forming) [EC:1.14.13.8]	azc01120||azc00680	K00485	dimethylaniline monooxygenase (N-oxide forming) [EC:1.14.13.8]	Drug metabolism - cytochrome P450	1.14.13.8	A8I1G8					CAMPEP_0184480886-CAMNT_0026859669	66.18			Norrisiella sphaerica, Strain BC52	91329	Bacteria	Alphaproteobacteria	50822	131	0.5076	16	16	Bacteria;Proteobacteria;Alphaproteobacteria;Rhizobiales;Rhizobiaceae;Ensifer;Sinorhizobium arboris LMG 14919	PF00743	Flavin-binding monooxygenase-like						0	2	61
contig_5014_1_755_+	803	755	pbr:PB2503_13524	hypothetical protein						E0THF0					PB2503_13524-NC_014414	51.05	hypothetical protein	CAM_CRCL_33739491	Parvularcula bermudensis HTCC2503	314260	Bacteria	Alphaproteobacteria	50822	131	1	1	1	Bacteria;Proteobacteria;Alphaproteobacteria;Parvularculales;Parvularculaceae;Parvularcula;Parvularcula bermudensis HTCC2503								0	362	12
contig_50625_581_802_-	1039	222	msl:Msil_3800	cytochrome b/b6 domain protein						B8EMK3	KOG4663	Cytochrome b	Energy production and conversion	METABOLISM	MicloDRAFT_00042220-GCA_000262405.1_JH660645	53.42	cytochrome b subunit of the bc complex		Microvirga WSM3557	754501	Bacteria	Alphaproteobacteria	50822	131	0.6553	82	82	Bacteria;Proteobacteria;Alphaproteobacteria;Rhizobiales;Bradyrhizobiaceae;Bradyrhizobium;Bradyrhizobium ARR65	PF13631	Cytochrome b(N-terminal)/b6/petB						2	2	166
contig_5239_183_617_+	732	435	hne:HNE_2294	hypothetical protein						Q0BZV4					HNE_2294-NC_008358	36.84	hypothetical protein	CAM_CRCL_34485688	Hyphomonas neptunium ATCC 15444	228405	Bacteria	Alphaproteobacteria	50822	131	1	1	1	Bacteria;Proteobacteria;Alphaproteobacteria;Caulobacterales;Hyphomonadaceae;Hyphomonas;Hyphomonas neptunium ATCC 15444								0	96	0
contig_52632_191_649_-	781	459													wNo_07570-NC_021084	28.7	oxidoreductase		Wolbachia endosymbiont of Drosophila simulans wNo	1236908	Bacteria	Alphaproteobacteria	50822	131	0.5315	20	20	Bacteria;Proteobacteria;Alphaproteobacteria;Rickettsiales;Anaplasmataceae;Wolbachia;Wolbachia endosymbiont of Drosophila melanogaster								4	5	456
contig_53241_139_369_-	369	231													gi495346147-NZ_GL876934	53.12	hypothetical protein		Novosphingobium nitrogenifigens DSM 19370	983920	Bacteria	Alphaproteobacteria	50822	131	0.569	3	3	Bacteria;Proteobacteria;Alphaproteobacteria;Rhodobacterales;Rhodobacteraceae;Rhodovulum;Rhodovulum PH10								0	4	1297
contig_53372_2_506_-	506	505	sil:SPO1370	aminotransferase family protein						Q5LTP3					CAMPEP_0193145134-CAMNT_0037496723	54.35			Undescribed sp CCMP2097	483370	Bacteria	Alphaproteobacteria	50822	131	0.5632	14	14	Bacteria;Proteobacteria;Alphaproteobacteria;Rhodobacterales;Rhodobacteraceae;Ruegeria;Ruegeria pomeroyi DSS-3								0	2	103
contig_54250_1_592_+	592	592	swi:Swit_3047	phytanoyl-CoA dioxygenase						A5VAT1					Swit_3047-NC_009511	38.41	phytanoyl-CoA dioxygenase	CAM_CRCL_4010927	Sphingomonas wittichii RW1	392499	Bacteria	Alphaproteobacteria	50822	131	1	1	1	Bacteria;Proteobacteria;Alphaproteobacteria;Sphingomonadales;Sphingomonadaceae;Sphingomonas;Sphingomonas wittichii RW1	PF05721||_GAP_	Phytanoyl-CoA dioxygenase (PhyH)||_GAP_						0	0	64
contig_5458_1_698_+	698	698	apb:SAR116_0526	putative threonine ammonia-lyase (EC:4.3.1.19); K01754 threonine dehydratase [EC:4.3.1.19]	apb00260||apb01110||apb01100||apb00290	K01754	threonine dehydratase [EC:4.3.1.19]	Glycine, serine and threonine metabolism || Valine, leucine and isoleucine biosynthesis || Carbon metabolism || Biosynthesis of amino acids	4.3.1.19	D5BR72					SAR116_0526-NC_014010	76.74	putative Threonine ammonia-lyase (EC:4.3.1.19); K01754 threonine dehydratase [EC:4.3.1.19]	CAM_CRCL_4007958	Puniceispirillum marinum IMCC1322	488538	Bacteria	Alphaproteobacteria	50822	131	1	1	1	Bacteria;Proteobacteria;Alphaproteobacteria;SAR116;SAR116_X;SAR116_XX;Puniceispirillum marinum IMCC1322	PF00291	Pyridoxal-phosphate dependent enzyme						0	98	0
contig_5478_1_692_+	692	692	cps:CPS_4059	beta alanine--pyruvate transaminase (EC:2.6.1.18); K00822 beta-alanine--pyruvate transaminase [EC:2.6.1.18]	cps00410||cps00280||cps01100||cps00640	K00822	beta-alanine--pyruvate transaminase [EC:2.6.1.18]	Valine, leucine and isoleucine degradation || beta-Alanine metabolism || Propanoate metabolism	2.6.1.18	Q47WV7					gi498007981-NZ_AFPL01000013	75	beta alanine--pyruvate aminotransferase		Marinobacterium stanieri S30	1042375	Bacteria	Alphaproteobacteria	50822	131	0.7148	8	8	Bacteria;Proteobacteria;Alphaproteobacteria;Rhodospirillales;Rhodospirillaceae;Rhodospirillum;Rhodospirillum photometricum DSM 122	_GAP_||PF00202	_GAP_||Aminotransferase class-III						0	63	0
contig_5488_1_492_-	492	492	kvu:EIO_3068	glutamate synthase large subunit; K00265 glutamate synthase (NADPH/NADH) large chain [EC:1.4.1.13 1.4.1.14]	kvu00910||kvu00250||kvu01100||kvu01120||kvu01110	K00265	glutamate synthase (NADPH/NADH) large chain [EC:1.4.1.13 1.4.1.14]	Alanine, aspartate and glutamate metabolism || Nitrogen metabolism || Biosynthesis of amino acids	1.4.1.13||1.4.1.14	E3F589					EIO_3068-NC_014621	68.52	glutamate synthase large subunit; K00265 glutamate synthase (NADPH/NADH) large chain [EC:1.4.1.13 1.4.1.14]	CAM_CRCL_3994	Ketogulonicigenium vulgare Y25	880591	Bacteria	Alphaproteobacteria	50822	131	0.759	7	7	Bacteria;Proteobacteria;Alphaproteobacteria;Rhizobiales;Rhizobiaceae;Agrobacterium;Agrobacterium ATCC 31749								0	61	0
contig_5490_1_421_+	421	421	pzu:PHZ_c2012	TonB-dependent receptor						B4RDZ0					PHZ_c2012-NC_011144	45.69	TonB-dependent receptor	CAM_CRCL_6092273	Phenylobacterium zucineum HLK1	450851	Bacteria	Alphaproteobacteria	50822	131	0.8626	3	3	Bacteria;Proteobacteria;Alphaproteobacteria;Sphingomonadales;Sphingomonadaceae;Sphingomonas;Sphingomonas wittichii RW1	PF00593	TonB dependent receptor						0	143	6
contig_5501_1_496_+	516	496	mpc:Mar181_0638	enoyl-CoA hydratase/isomerase; K01692 enoyl-CoA hydratase [EC:4.2.1.17]	mpc00627||mpc01120||mpc00640||mpc00380||mpc00280||mpc01100||mpc01110||mpc00903||mpc00930||mpc00281||mpc00362||mpc00650||mpc00310||mpc00071||mpc00410	K01692	enoyl-CoA hydratase [EC:4.2.1.17]	Fatty acid degradation || Valine, leucine and isoleucine degradation || Geraniol degradation || Lysine degradation || Phenylalanine metabolism || Benzoate degradation || Tryptophan metabolism || beta-Alanine metabolism || Aminobenzoate degradation || Propanoate metabolism || Butanoate metabolism || Limonene and pinene degradation || Caprolactam degradation || Fatty acid metabolism	4.2.1.17						A3AMDRAFT_05417-A3AMDRAFT_scaffold_84.85	84.76	Enoyl-CoA hydratase/carnithine racemase		Bradyrhizobium elkanii USDA 3254	1079479	Bacteria	Alphaproteobacteria	50822	131	1	1	1	Bacteria;Proteobacteria;Alphaproteobacteria;Rhizobiales;Bradyrhizobiaceae;Bradyrhizobium;Bradyrhizobium elkanii USDA 3254	PF00378	Enoyl-CoA hydratase/isomerase family						0	139	7
contig_5758_96_263_+	372	168													KB13_738-GCA_000156155.1_scf_1106380163076	80	hypothetical protein		beta proteobacterium KB13	314607	Bacteria	Alphaproteobacteria	50822	131	0.8214	4	3	Bacteria;Proteobacteria;Alphaproteobacteria;Misc. Alphaproteobacteria;Environmental Alphaproteobacteria;Uncultured Alphaproteobacteria;Rhodobacterales bacterium HTCC2255								0	60	0
contig_5788_1_406_+	455	406													PJE062_4022-NZ_DS996816	84.21	ABC transporter, substrate-binding protein, family 1	CAM_CRCL_11170	Pseudovibrio JE062	439495	Bacteria	Alphaproteobacteria	50822	131	0.7064	4	4	Bacteria;Proteobacteria;Alphaproteobacteria;Rhodobacterales;Rhodobacteraceae;Sulfitobacter;Sulfitobacter EE-36								0	78	0
contig_5920_179_511_+	592	333													HIMB100_00009990-GCA_000238815.2_contig7	49.53	hypothetical protein		SAR116 cluster alpha proteobacterium HIMB100	909943	Bacteria	Alphaproteobacteria	50822	131	1	1	1	Bacteria;Proteobacteria;Alphaproteobacteria;SAR116;SAR116_X;SAR116_XX;SAR116 cluster alpha proteobacterium HIMB100	PF12680	PF12680						0	115	8
contig_60228_1_583_+	583	583	azl:AZL_012010	hypothetical protein						D3NTW0					AZL_012010-NC_013854	50.43	hypothetical protein	CAM_CRCL_16363	Azospirillum B510	137722	Bacteria	Alphaproteobacteria	50822	131	0.593	10	10	Bacteria;Proteobacteria;Alphaproteobacteria;Rhodospirillales;Rhodospirillaceae;Azospirillum;Azospirillum B510	PF02469||_GAP_	Fasciclin domain||_GAP_						0	2	164
contig_6207_1_759_-	759	759	kvu:EIO_3068	glutamate synthase large subunit; K00265 glutamate synthase (NADPH/NADH) large chain [EC:1.4.1.13 1.4.1.14]	kvu00910||kvu00250||kvu01100||kvu01120||kvu01110	K00265	glutamate synthase (NADPH/NADH) large chain [EC:1.4.1.13 1.4.1.14]	Alanine, aspartate and glutamate metabolism || Nitrogen metabolism || Biosynthesis of amino acids	1.4.1.13||1.4.1.14	E3F589					EIO_3068-NC_014621	73.2	glutamate synthase large subunit; K00265 glutamate synthase (NADPH/NADH) large chain [EC:1.4.1.13 1.4.1.14]	CAM_CRCL_3994	Ketogulonicigenium vulgare Y25	880591	Bacteria	Alphaproteobacteria	50822	131	1	1	1	Bacteria;Proteobacteria;Alphaproteobacteria;Rhodobacterales;Rhodobacteraceae;Ketogulonicigenium;Ketogulonicigenium vulgare Y25	_GAP_||PF01645	_GAP_||Conserved region in glutamate synthase						0	97	15
contig_68371_1_358_-	358	358	aci:ACIAD0809	sbmA; transport protein						Q6FDZ7					HMPREF0016_00740-NZ_GG704964	56.3	ABC-type long-chain fatty acid transport system protein	CAM_CRCL_3006	Acinetobacter johnsonii SH046	575586	Bacteria	Alphaproteobacteria	50822	131	0.7139	101	100	Bacteria;Proteobacteria;Alphaproteobacteria;Rhizobiales;Rhizobiaceae;Rhizobium;Rhizobium STM 6155	PF05992	SbmA/BacA-like family			PUP	peptide uptake	3	1	2	72
contig_6929_109_418_-	418	310	rpb:RPB_2594	hypothetical protein; K09796 hypothetical protein		K09796	hypothetical protein			Q2IWW3					gi496255049-NZ_CAFK01000058	40.4	hypothetical protein		Bradyrhizobium STM 3843	551947	Bacteria	Alphaproteobacteria	50822	131	0.7939	7	7	Bacteria;Proteobacteria;Alphaproteobacteria;Rhizobiales;Bradyrhizobiaceae;Bradyrhizobiaceae_X;Bradyrhizobiaceae bacterium SG-6C	PF04314	Protein of unknown function (DUF461)						0	77	0
contig_70056_1_361_-	361	361													gi119476620-NZ_AAVT01000004	48.48	Bacteriorhodopsin	CAM_CRCL_1047	marine gamma proteobacterium HTCC2143	247633	Bacteria	Alphaproteobacteria	50822	131	0.7618	7	7	Bacteria;Proteobacteria;Alphaproteobacteria;Misc. Alphaproteobacteria;Environmental Alphaproteobacteria;Uncultured Alphaproteobacteria;Rhodobacterales bacterium HTCC2255								0	2	97
contig_7016_96_549_+	549	454	agr:AGROH133_03081	gltB; glutamate synthase large subunit (EC:1.4.1.13); K00265 glutamate synthase (NADPH/NADH) large chain [EC:1.4.1.13 1.4.1.14]	agr00250||agr01120||agr01100||agr01110||agr00910	K00265	glutamate synthase (NADPH/NADH) large chain [EC:1.4.1.13 1.4.1.14]	Alanine, aspartate and glutamate metabolism || Nitrogen metabolism || Biosynthesis of amino acids	1.4.1.13||1.4.1.14						AGROH133_03081-NC_015183	67.81	gltB; glutamate synthase large subunit (EC:1.4.1.13)	CAM_CRCL_3994	Agrobacterium H13-3	861208	Bacteria	Alphaproteobacteria	50822	131	0.7708	5	5	Bacteria;Proteobacteria;Alphaproteobacteria;Rhizobiales;Rhizobiaceae;Agrobacterium;Agrobacterium ATCC 31749	PF00310	Glutamine amidotransferases class-II						0	76	0
contig_7097_1_633_+	633	633	rde:RD1_2288	dmdA; putative dimethyl sulfoniopropionate demethylase (EC:2.1.2.10); K00605 aminomethyltransferase [EC:2.1.2.10]	rde01100||rde00260||rde00670||rde00910	K00605	aminomethyltransferase [EC:2.1.2.10]	Glycine, serine and threonine metabolism || One carbon pool by folate || Carbon metabolism	2.1.2.10	Q167H2					RD1_2288-NC_008209	49.07	dmdA; putative dimethyl sulfoniopropionate demethylase (EC:2.1.2.10); K00605 aminomethyltransferase [EC:2.1.2.10]	CAM_CRCL_7800	Roseobacter denitrificans OCh 114	375451	Bacteria	Alphaproteobacteria	50822	131	0.8003	11	11	Bacteria;Proteobacteria;Alphaproteobacteria;Rhodobacterales;Rhodobacteraceae;Roseobacter;Roseobacter MED193	PF01571||_GAP_	Aminomethyltransferase folate-binding domain||_GAP_						0	64	0
contig_74798_1_613_+	613	613	pla:Plav_1623	cyclohexanone monooxygenase (EC:1.14.13.22)						A7HTK9					BraelDRAFT_3862-BraelDRAFT_scaffold2.2	53.09	Predicted flavoprotein involved in K+ transport		Bradyrhizobium elkanii USDA 76	398525	Bacteria	Alphaproteobacteria	50822	131	0.9305	6	6	Bacteria;Proteobacteria;Alphaproteobacteria;Rhizobiales;Bradyrhizobiaceae;Bradyrhizobium;Bradyrhizobium elkanii USDA 3254								0	0	72
contig_7518_1_408_-	408	408	rde:RD1_3716	gnl; gluconolactonase, putative (EC:3.1.1.17); K01053 gluconolactonase [EC:3.1.1.17]	rde00053||rde01100||rde01120||rde00030||rde01110||rde00930	K01053	gluconolactonase [EC:3.1.1.17]	Pentose phosphate pathway || Ascorbate and aldarate metabolism || Caprolactam degradation || Carbon metabolism || Degradation of aromatic compounds	3.1.1.17	Q162A5					RD1_3716-NC_008209	52.24	gnl; gluconolactonase, putative (EC:3.1.1.17); K01053 gluconolactonase [EC:3.1.1.17]	CAM_CRCL_20450	Roseobacter denitrificans OCh 114	375451	Bacteria	Alphaproteobacteria	50822	131	0.871	39	39	Bacteria;Proteobacteria;Alphaproteobacteria;Rhizobiales;Rhizobiaceae;Rhizobium;Rhizobium etli CIAT 652	PF08450	SMP-30/Gluconolaconase/LRE-like region						0	75	63
contig_7556_1_444_+	444	444													PGA2_c28580-NC_018286	72.09	amino acid transporter, extracellular ligand-binding receptor		Phaeobacter gallaeciensis 2.10	383629	Bacteria	Alphaproteobacteria	50822	131	0.8626	3	3	Bacteria;Proteobacteria;Alphaproteobacteria;Rhodobacterales;Rhodobacteraceae;Citreicella;Citreicella SE45	PF13458	PF13458						0	59	0
contig_8109_1_428_-	428	428	mfa:Mfla_2734	glutamate synthase (NADPH) (EC:1.4.1.13)						Q1GXP0					Mfla_2734-NC_007947	73.94	glutamate synthase (NADPH) (EC:1.4.1.13)	CAM_CRCL_14323874	Methylobacillus flagellatus KT	265072	Bacteria	Alphaproteobacteria	50822	131	0.7893	2	2	Bacteria;Proteobacteria;Alphaproteobacteria;Rhodobacterales;Rhodobacteraceae;Ketogulonicigenium;Ketogulonicigenium vulgare Y25	PF00310	Glutamine amidotransferases class-II						0	55	0
contig_84729_1_723_+	723	723	dgr:Dgri_GH11092	GH11092 gene product from transcript GH11092-RA; K02835 peptide chain release factor 1		K02835	peptide chain release factor 1			B4JCT3	KOG2726	Mitochondrial polypeptide chain release factor	Translation, ribosomal structure and biogenesis	INFORMATION STORAGE AND PROCESSING	FBpp0144998-scaffold_15252dgri_r1	50.29	GH11092 [Source:FlyBase;GeneId:FBgn0118573]	CAM_CRCL_734	Drosophila grimshawi	7222	Bacteria	Alphaproteobacteria	50822	131	0.4556	12	12	Bacteria;Proteobacteria;Alphaproteobacteria;Rhodospirillales;Acetobacteraceae;Roseomonas;Roseomonas cervicalis ATCC 49957	_GAP_||PF00472||_GAP_	_GAP_||RF-1 domain||_GAP_						0	0	62
contig_8708_1_711_+	711	711													SLG_05650-NC_015976	62.66	dcp; peptidyl-dipeptidase Dcp		Sphingobium SYK-6	627192	Bacteria	Alphaproteobacteria	50822	131	0.9403	2	2	Bacteria;Proteobacteria;Alphaproteobacteria;Sphingomonadales;Sphingomonadaceae;Sphingobium;Sphingobium SYK-6	_GAP_||PF01432	_GAP_||Peptidase family M3						0	61	3
contig_92467_1_350_+	350	350													gi497983112-NZ_AEWF01000001	27.17	hypothetical protein		Odyssella thessalonicensis L13	985867	Bacteria	Alphaproteobacteria	50822	131	1	1	1	Bacteria;Proteobacteria;Alphaproteobacteria;Rickettsiales;Odyssella;Odyssella thessalonicensis;Odyssella thessalonicensis L13								0	8	55
contig_95276_1_321_+	321	321	jan:Jann_1769	mucin-associated surface protein						Q28RH6					Jann_1769-NC_007802	35.71	mucin-associated surface protein	CAM_CRCL_6033997	Jannaschia CCS1	290400	Bacteria	Alphaproteobacteria	50822	131	1	1	1	Bacteria;Proteobacteria;Alphaproteobacteria;Rhodobacterales;Rhodobacteraceae;Jannaschia;Jannaschia CCS1								0	8	46
contig_101971_1_517_-	517	517	tga:TGAM_1172	smc1; chromosome segregation protein SMC (smc1); K03529 chromosome segregation protein		K03529	chromosome segregation protein			C5A612					TGAM_1172-NC_012804	28.98	smc1; chromosome segregation protein SMC (smc1); K03529 chromosome segregation protein	CAM_CRCL_6036907	Thermococcus gammatolerans EJ3	593117	Archaea	Archaea	6067	24	0.6483	3	3	Archaea;Euryarchaeota;Thermococci;Thermococcales;Thermococcaceae;Thermococcus;Thermococcus AM4								0	3	136
contig_102950_1_397_+	397	397	tba:TERMP_01707	hypothetical protein; K07745 hypothetical protein		K07745	hypothetical protein			F0LJP0					TERMP_01707-NC_014804	28.35	hypothetical protein; K07745 hypothetical protein	CAM_CRCL_4017812	Thermococcus barophilus MP	391623	Archaea	Archaea	6067	24	1	1	1	Archaea;Euryarchaeota;Thermococci;Thermococcales;Thermococcaceae;Thermococcus;Thermococcus barophilus MP								0	4	61
contig_114354_94_1014_+	1408	921	mpl:Mpal_2630	PKD domain containing protein						B8GF92					Mpal_2630-NC_011832	41.37	PKD domain containing protein	CAM_CRCL_4084937	Methanosphaerula palustris E1-9c	521011	Archaea	Archaea	6067	24	0.8006	6	3	Archaea;Euryarchaeota;Methanomicrobia;Methanomicrobiales;Methanoregulaceae;Methanosphaerula;Methanosphaerula palustris E1-9c	_GAP_||PF01436	_GAP_||NHL repeat						0	23	923
contig_122853_163_490_-	490	328	mif:Metin_0459	MscS mechanosensitive ion channel						D5VRC6					Metin_0459-NC_014122	26.51	MscS mechanosensitive ion channel	CAM_CRCL_35521	Methanocaldococcus infernus ME	573063	Archaea	Archaea	6067	24	1	1	1	Archaea;Euryarchaeota;Methanococci;Methanococcales;Methanocaldococcaceae;Methanocaldococcus;Methanocaldococcus infernus ME								3	4	114
contig_123660_1_494_+	494	494	nmg:Nmag_0658	GrpE protein; K03687 molecular chaperone GrpE		K03687	molecular chaperone GrpE			D3SZA9					Nmag_0658-NC_013922	29.13	GrpE protein; K03687 molecular chaperone GrpE	CAM_CRCL_4013050	Natrialba magadii ATCC 43099	547559	Archaea	Archaea	6067	24	1	1	1	Archaea;Euryarchaeota;Halobacteria;Halobacteriales;Halobacteriaceae;Natrialba;Natrialba magadii ATCC 43099								0	3	70
contig_132364_1_313_+	313	313	mma:MM_3106	hypothetical protein						Q8PSH3					MM_3106-NC_003901	39.71	hypothetical protein	CAM_CRCL_4842934	Methanosarcina mazei Go1	192952	Archaea	Archaea	6067	24	0.4862	4	4	Archaea;Euryarchaeota;Methanomicrobia;Methanosarcinales;Methanosarcinaceae;Methanosarcina;Methanosarcina mazei Go1	PF02469	Fasciclin domain						0	2	53
contig_144911_1_616_-	616	616	sin:YN1551_2013	ankyrin						C3NIT9					YN1551_2013-NC_012623	37.4	ankyrin repeat protein	CAM_CRCL_11542	Sulfolobus islandicus Y.N.15.51	419942	Archaea	Archaea	6067	24	1	1	1	Archaea;Crenarchaeota;Thermoprotei;Sulfolobales;Sulfolobaceae;Sulfolobus;Sulfolobus islandicus Y.N.15.51	PF12796||_GAP_	PF12796||_GAP_						0	13	76
contig_14738_15_441_+	441	427													Hbor_13530-NC_014737	33.1	penicillin-binding protein, beta-lactamase class c	CAM_CRCL_6580	Halogeometricum borinquense DSM 11551	469382	Archaea	Archaea	6067	24	0.9403	2	2	Archaea;Euryarchaeota;Halobacteria;Halobacteriales;Halobacteriaceae;Halogeometricum;Halogeometricum borinquense DSM 11551								0	56	0
contig_152431_1_992_-	992	992	mpl:Mpal_2630	PKD domain containing protein						B8GF92					Mpal_2630-NC_011832	43.43	PKD domain containing protein	CAM_CRCL_4084937	Methanosphaerula palustris E1-9c	521011	Archaea	Archaea	6067	24	0.9368	5	3	Archaea;Euryarchaeota;Methanomicrobia;Methanomicrobiales;Methanoregulaceae;Methanosphaerula;Methanosphaerula palustris E1-9c	_GAP_||PF01436||_GAP_	_GAP_||NHL repeat||_GAP_						0	188	411
contig_158622_121_314_-	314	194	mmz:MmarC7_0683	SCP-like extracellular						A6VH24					MmarC7_0683-NC_009637	38.71	SCP-like extracellular	CAM_CRCL_4008617	Methanococcus maripaludis C7	426368	Archaea	Archaea	6067	24	1	1	1	Archaea;Euryarchaeota;Methanococci;Methanococcales;Methanococcaceae;Methanococcus;Methanococcus maripaludis C7								0	0	105
contig_169310_606_1010_+	1298	405													NSED_04975-NC_018656	52.94	peptidoglycan binding protein		Nitrosopumilus A	1229909	Archaea	Archaea	6067	24	1	1	1	Archaea;Thaumarchaeota;Thaumarchaeota_X;Thaumarchaeota_XX;Thaumarchaeota_XXX;Nitrosopumilus;Nitrosopumilus A								0	305	10
contig_174293_1123_1431_-	1432	309	hla:Hlac_2087	CHRD domain containing protein						B9LR11					Hlac_2087-NC_012029	44.44	CHRD domain containing protein	CAM_CRCL_32546798	Halorubrum lacusprofundi ATCC 49239	416348	Archaea	Archaea	6067	24	1	1	1	Archaea;Euryarchaeota;Halobacteria;Halobacteriales;Halobacteriaceae;Halorubrum;Halorubrum lacusprofundi ATCC 49239								0	183	1582
contig_178091_1_738_+	738	738													BN140_0557-NC_018227	24.57	smc; Chromosome partition protein smc		Methanoculleus bourgensis MS2	1201294	Archaea	Archaea	6067	24	1	1	1	Archaea;Euryarchaeota;Methanomicrobia;Methanomicrobiales;Methanomicrobiaceae;Methanoculleus;Methanoculleus bourgensis MS2								0	18	82
contig_182623_1_426_-	489	426	phu:Phum_PHUM168430	Bromodomain-containing protein, putative; K11321 bromodomain-containing protein 8		K11321	bromodomain-containing protein 8			E0VFW5					PHUM168430-PA-DS235124PhumU1	26.35	Bromodomain-containing protein, putative	CAM_CRCL_4902	Pediculus humanus	121225	Archaea	Archaea	6067	24	0.523	2	2	Eukaryota;Opisthokonta;Metazoa;Arthropoda;Hexapoda;Insecta;Pediculus;Pediculus humanus								0	10	63
contig_188147_1_664_-	1008	664	mpl:Mpal_2630	PKD domain containing protein						B8GF92					Mpal_2630-NC_011832	48.95	PKD domain containing protein	CAM_CRCL_4084937	Methanosphaerula palustris E1-9c	521011	Archaea	Archaea	6067	24	0.921	4	3	Archaea;Euryarchaeota;Methanomicrobia;Methanomicrobiales;Methanoregulaceae;Methanosphaerula;Methanosphaerula palustris E1-9c	_GAP_||PF01436||_GAP_	_GAP_||NHL repeat||_GAP_						0	2	133
contig_188148_1_553_-	553	553	mpl:Mpal_1345	NHL repeat containing protein						B8GHS3					Metli_2432-Contig1	45.69	PKD domain containing protein		Methanofollis liminatans DSM 4140	28892	Archaea	Archaea	6067	24	0.8369	3	3	Archaea;Euryarchaeota;Methanomicrobia;Methanomicrobiales;Methanomicrobiaceae;Methanofollis;Methanofollis liminatans DSM 4140	_GAP_||PF01436	_GAP_||NHL repeat						0	6	215
contig_189881_617_970_-	2225	354													Abm4_0898-NC_021355	38.46	peptidase I		Methanobrevibacter AbM4	224719	Archaea	Archaea	6067	24	1	1	1	Archaea;Euryarchaeota;Methanobacteria;Methanobacteriales;Methanobacteriaceae;Methanobrevibacter;Methanobrevibacter AbM4	PF00717||_GAP_	Peptidase S24-like||_GAP_						0	293	5
contig_192913_1_648_+	1263	648	mpl:Mpal_0423	NHL repeat containing protein						B8GKB4					Mpal_0423-NC_011832	46.95	NHL repeat containing protein	CAM_CRCL_4084937	Methanosphaerula palustris E1-9c	521011	Archaea	Archaea	6067	24	0.75	4	2	Archaea;Euryarchaeota;Methanomicrobia;Methanomicrobiales;Methanoregulaceae;Methanosphaerula;Methanosphaerula palustris E1-9c	PF01436||_GAP_	NHL repeat||_GAP_						0	0	247
contig_193053_47_730_-	867	684													gi494748953-NZ_AGNT01000001	36.17	hypothetical protein		Haloredivivus G17	1072681	Archaea	Archaea	6067	24	1	1	1	Archaea;Euryarchaeota;Nanohaloarchaea;Nanohaloarchaea_X;Nanohaloarchaea_XX;Haloredivivus;Haloredivivus G17								0	8	206
contig_193524_1_685_-	685	685	mpl:Mpal_2630	PKD domain containing protein						B8GF92					Mpal_2630-NC_011832	52.76	PKD domain containing protein	CAM_CRCL_4084937	Methanosphaerula palustris E1-9c	521011	Archaea	Archaea	6067	24	0.9345	3	2	Archaea;Euryarchaeota;Methanomicrobia;Methanomicrobiales;Methanoregulaceae;Methanosphaerula;Methanosphaerula palustris E1-9c	PF01436||_GAP_	NHL repeat||_GAP_						0	8	228
contig_36507_1_1011_-	1306	1011													Cfla_3154-NC_014151	25.15	glycosyl transferase family 2	CAM_CRCL_37067	Cellulomonas flavigena DSM 20109	446466	Archaea	Archaea	6067	24	0.5	2	2	Archaea;Crenarchaeota;Thermoprotei;Thermoproteales;Thermoproteaceae;Vulcanisaeta;Vulcanisaeta distributa DSM 14429	_GAP_||PF13632	_GAP_||PF13632						2	5	174
contig_41699_1_530_-	530	530	tga:TGAM_0987	hypothetical protein						C5A5H7					TGAM_0987-NC_012804	30.88	hypothetical protein	CAM_CRCL_4017812	Thermococcus gammatolerans EJ3	593117	Archaea	Archaea	6067	24	1	1	1	Archaea;Euryarchaeota;Thermococci;Thermococcales;Thermococcaceae;Thermococcus;Thermococcus gammatolerans EJ3								0	16	57
contig_46388_1_829_-	829	829													HAH_2099-NC_015948	44.44	cdc48d; cell division control protein 48/AAA family ATPase	CAM_CRCL_2253	Haloarcula hispanica ATCC 33960	634497	Archaea	Archaea	6067	24	0.6859	49	42	Archaea;Euryarchaeota;Halobacteria;Halobacteriales;Halobacteriaceae;Natronococcus;Natronococcus occultus SP4	_GAP_||PF00004	_GAP_||ATPase family associated with various cellular activities (AAA)						0	2	118
contig_46442_56_568_-	568	513	mev:Metev_2360	zinc finger C2H2-type domain-containing protein						D7EC48					Metev_2360-NC_014254	33	zinc finger C2H2-type domain-containing protein		Methanohalobium evestigatum Z-7303	644295	Archaea	Archaea	6067	24	0.5712	4	4	Eukaryota;Opisthokonta;Metazoa;Arthropoda;Hexapoda;Insecta;Apis;Apis mellifera	_GAP_||PF13894	_GAP_||PF13894						0	5	189
contig_5175_25_498_+	570	474	mmg:MTBMA_c09220	msrA; peptide methionine sulfoxide reductase (EC:1.8.4.11); K07304 peptide-methionine (S)-S-oxide reductase [EC:1.8.4.11]		K07304	peptide-methionine (S)-S-oxide reductase [EC:1.8.4.11]		1.8.4.11	D9PWB9					HMPREF9374_3724-GCA_000213595.1_GL892032	57.52	peptide-methionine (S)-S-oxide reductase		Desmospora 8437	997346	Archaea	Archaea	6067	24	0.5651	5	5	Archaea;Euryarchaeota;Methanobacteria;Methanobacteriales;Methanobacteriaceae;Methanothermobacter;Methanothermobacter marburgensis str. Marburg	PF01625	Peptide methionine sulfoxide reductase	TIGR00401	peptide-methionine (S)-S-oxide reductase				0	330	0
contig_53825_1_476_-	476	476	hbu:Hbut_1135	site-specific DNA methylase; K00558 DNA (cytosine-5-)-methyltransferase [EC:2.1.1.37]	hbu01100||hbu00270	K00558	DNA (cytosine-5)-methyltransferase 1 [EC:2.1.1.37]	Cysteine and methionine metabolism || MicroRNAs in cancer	2.1.1.37	A2BLW1					Vdis_1640-NC_014537	34.51	DNA-cytosine methyltransferase	CAM_CRCL_88945	Vulcanisaeta distributa DSM 14429	572478	Archaea	Archaea	6067	24	1	1	1	Archaea;Crenarchaeota;Thermoprotei;Thermoproteales;Thermoproteaceae;Vulcanisaeta;Vulcanisaeta distributa DSM 14429								0	1	76
contig_54851_1_397_+	397	397	mel:Metbo_0907	hypothetical protein						F0TBS9					Metbo_0907-NC_015216	27.18	hypothetical protein	CAM_CRCL_4034076	Methanobacterium AL-21	868132	Archaea	Archaea	6067	24	1	1	1	Archaea;Euryarchaeota;Methanobacteria;Methanobacteriales;Methanobacteriaceae;Methanobacterium;Methanobacterium AL-21								0	1	75
contig_58631_207_542_-	542	336	mmx:MmarC6_0009	hypothetical protein						A9A801					MmarC6_0009-NC_009975	31.46	hypothetical protein	CAM_CRCL_14715137	Methanococcus maripaludis C6	444158	Archaea	Archaea	6067	24	1	1	1	Archaea;Euryarchaeota;Methanococci;Methanococcales;Methanococcaceae;Methanococcus;Methanococcus maripaludis C6								0	13	48
contig_75061_23_508_+	625	486													gi494643277-NZ_CM001158	28.04	NHL repeat-containing protein		Nitrosoarchaeum limnia SFB1	886738	Archaea	Archaea	6067	24	0.523	2	2	Eukaryota;Opisthokonta;Metazoa;Arthropoda;Hexapoda;Insecta;Apis;Apis mellifera								0	0	115
contig_91128_1_367_+	367	367													gi497447451-NZ_AGIR01000001	32.08	alpha integrin		Halobacterium DL1	751944	Archaea	Archaea	6067	24	1	1	1	Archaea;Euryarchaeota;Halobacteria;Halobacteriales;Halobacteriaceae;Halobacterium;Halobacterium DL1								0	25	38
contig_93334_1_430_+	430	430	hwa:HQ1264A	smc; chromosome partition protein; K03529 chromosome segregation protein		K03529	chromosome segregation protein			Q18KQ1					149795-Guith1_scaffold_638	30.56			Guillardia theta	55529	Archaea	Archaea	6067	24	0.3242	6	6	Archaea;Euryarchaeota;Halobacteria;Halobacteriales;Halobacteriaceae;Haloquadratum;Haloquadratum walsbyi C23								0	13	44
contig_100153_1_369_+	369	369													CAMPEP_0119376864-CAMNT_0007395569	45.71			Calcidiscus leptoporus, Strain RCC1130	127549	Eukaryota	Archaeplastida	93930	359	0.6335	9	8	Eukaryota;Archaeplastida;Chlorophyta;Mamiellophyceae;Mamiellales;Mamiellaceae;Micromonas;Micromonas pusilla RCC2306								0	2	53
contig_100243_1_285_+	365	285	vcn:VOLCADRAFT_104780	eif5A; eukaryotic translation initiation factor 5A; K03263 translation initiation factor 5A							KOG3271	Translation initiation factor 5A (eIF-5A)	Translation, ribosomal structure and biogenesis	INFORMATION STORAGE AND PROCESSING	CAMPEP_0197967052-CAMNT_0043598191	37.63			Polarella glacialis, Strain CCMP2088	89957	Eukaryota	Archaeplastida	93930	359	0.774	3	3	Eukaryota;Archaeplastida;Chlorophyta;Pyramimonadales;Pyramimonadales_X;Pyramimonadales_XX;Pyramimonas;Pyramimonas amylifera, Strain CCMP720	PF01287	Eukaryotic elongation factor 5A hypusine, DNA-binding OB fold						0	1	51
contig_101003_1_539_+	539	539									KOG0865	Cyclophilin type peptidyl-prolyl cis-trans isomerase	Posttranslational modification, protein turnover, chaperones	CELLULAR PROCESSES AND SIGNALING	CAMPEP_0199852598-CAMNT_0045752449	69.74			Favella taraikaensis, Strain Fe Narragansett Bay	626734	Eukaryota	Archaeplastida	93930	359	0.5908	12	11	Eukaryota;Archaeplastida;Chlorophyta;Chlorodendrophyceae;Chlorodendrales;Chlorodendrales_X;Tetraselmis;Tetraselmis chuii, Strain PLY429	_GAP_||PF00160	_GAP_||Cyclophilin type peptidyl-prolyl cis-trans isomerase/CLD						0	1	86
contig_101043_1_500_+	512	500													CAMPEP_0182858052-CAMNT_0024989395	34.29			Nephroselmis pyriformis, Strain CCMP717	156128	Eukaryota	Archaeplastida	93930	359	1	1	1	Eukaryota;Archaeplastida;Chlorophyta;Nephroselmidophyceae;Nephroselmidophyceae_X;Nephroselmidaceae;Nephroselmis;Nephroselmis pyriformis, Strain CCMP717								0	4	130
contig_101138_1_390_-	390	390													CAMPEP_0186762204-CAMNT_0029641979	36.99			Azadinium spinosum 3D9	632150	Eukaryota	Archaeplastida	93930	359	0.684	4	3	Eukaryota;Archaeplastida;Chlorophyta;Chlorodendrophyceae;Chlorodendrales;Chlorodendrales_X;Tetraselmis;Tetraselmis astigmatica, Strain CCMP880	_GAP_||PF00024	_GAP_||PAN domain						0	4	54
contig_101563_454_745_-	745	292													CAMPEP_0198737366-CAMNT_0044501229	39.02			Cyanoptycaceae	-283599	Eukaryota	Archaeplastida	93930	359	1	1	1	Eukaryota;Archaeplastida;Rhodophyta;Unclassified_Rhodophyta;Unclassified_Rhodophyta_X;Unclassified_Rhodophyta_XX;Coastal Red Alga;Cyanoptycaceae sp.								0	6	64
contig_101872_1_509_+	509	509													CAMPEP_0197481610-CAMNT_0043023887	38.39			Prasinophyceae sp. RCC998	464263	Eukaryota	Archaeplastida	93930	359	0.8833	2	2	Eukaryota;Archaeplastida;Chlorophyta;Prasinophyceae;Prasinophyceae_X;Prasinophyceae_XX;Prasinophyceae_XXX;Prasinophyceae CCMP2111								1	0	67
contig_102421_1_384_+	384	384	nve:NEMVE_v1g180719	hypothetical protein ; K11593 eukaryotic translation initiation factor 2C		K11593	eukaryotic translation initiation factor 2C			A7RQ46	KOG1041	Translation initiation factor 2C (eIF-2C) and related proteins	Translation, ribosomal structure and biogenesis	INFORMATION STORAGE AND PROCESSING	NEMVEDRAFT_v1g180719-PA-scaffold_21Nemve1	38.89	Predicted protein [Source:UniProtKB/TrEMBL;Acc:A7RQ46]	CAM_CRCL_4314	Nematostella vectensis	45351	Eukaryota	Archaeplastida	93930	359	0.785	17	12	Eukaryota;Archaeplastida;Streptophyta;Embryophyceae;Embryophyceae_X;Embryophyceae_XX;Oryza;Oryza sativa (japonica cultivar-group) mitochondrial	_GAP_||PF02171	_GAP_||Piwi domain						0	3	68
contig_103966_1_518_+	518	518	ppp:PHYPADRAFT_63513	hypothetical protein						A9TY71	KOG1543	Cysteine proteinase Cathepsin L	Posttranslational modification, protein turnover, chaperones	CELLULAR PROCESSES AND SIGNALING	GRMZM2G036203_P02-7AGPv2	48.28	hypothetical protein LOC100382061 [Source:RefSeq peptide;Acc:NP_001168296]	CAM_CRCL_4001712	Zea mays	4577	Eukaryota	Archaeplastida	93930	359	1	2	1	Eukaryota;Archaeplastida;Streptophyta;Embryophyceae;Embryophyceae_X;Embryophyceae_XX;Zea;Zea mays	_GAP_||PF00112	_GAP_||Papain family cysteine protease						0	0	99
contig_104403_1_464_-	464	464	vcn:VOLCADRAFT_91191	hypothetical protein											jgi_91191_7113.m000086-Volca1	35.58	hypothetical protein	CAM_CRCL_4043261	Volvox carteri	3067	Eukaryota	Archaeplastida	93930	359	1	1	1	Eukaryota;Archaeplastida;Chlorophyta;Chlorophyceae;Chlorophyceae_X;CW-Chlamydomonadales;Volvox;Volvox carteri								0	0	57
contig_104471_1_220_+	323	220	dgr:Dgri_GH24491	GH24491 gene product from transcript GH24491-RA						B4JLP4	KOG1721	FOG: Zn-finger	General function prediction only	POORLY CHARACTERIZED	CAMPEP_0113969604-CAMNT_0000983375	39.29			Rhodosorus marinus CCMP769	-311207	Eukaryota	Archaeplastida	93930	359	0.8373	2	2	Eukaryota;Archaeplastida;Rhodophyta;Florideophyceae;Gigartinales;Gigartinales_X;Eucheuma;Eucheuma denticulatum	PF13894	PF13894						0	10	107
contig_104675_16_451_-	451	436													CAMPEP_0179266056-CAMNT_0020974277	52.27			Dinophysis acuminata	47934	Eukaryota	Archaeplastida	93930	359	0.842	4	2	Eukaryota;Archaeplastida;Streptophyta;Embryophyceae;Embryophyceae_X;Embryophyceae_XX;Zea;Zea mays								0	4	71
contig_106008_1_502_-	502	502									KOG0102	Molecular chaperones mortalin/PBP74/GRP75, HSP70 superfamily	Posttranslational modification, protein turnover, chaperones	CELLULAR PROCESSES AND SIGNALING	SLG_16080-NC_015976	62.28	dnaK; molecular chaperone DnaK		Sphingobium SYK-6	627192	Eukaryota	Archaeplastida	93930	359	0.4503	54	47	Eukaryota;Archaeplastida;Streptophyta;Embryophyceae;Embryophyceae_X;Embryophyceae_XX;Oryza;Oryza sativa (japonica cultivar-group) mitochondrial	PF00012	Hsp70 protein						0	4	64
contig_1064_1_448_+	519	448	lan:Lacal_1743	Rhodanese-like protein											gi149371712-NZ_ABCO01000006	51.82	thioredoxin family protein	CAM_CRCL_20697	unidentified eubacterium SCB49	50743	Eukaryota	Archaeplastida	93930	359	0.523	2	2	Eukaryota;Archaeplastida;Rhodophyta;Compsopogonophyceae;Erythropeltidales;Erythrotrichiaceae;Madagascaria;Madagascaria erythrocladioides	_GAP_||PF00581	_GAP_||Rhodanese-like domain						0	79	0
contig_106918_307_723_-	723	417	vcn:VOLCADRAFT_106537	dynein heavy chain 2; K10408 dynein heavy chain, axonemal											CAMPEP_0202924536-CAMNT_0049618281	54.03			Chlamydomonas chlamydogama, Strain SAG 11-48b	225041	Eukaryota	Archaeplastida	93930	359	1	1	1	Eukaryota;Archaeplastida;Chlorophyta;Chlorophyceae;Chlorophyceae_X;CW-Chlamydomonadales;Chlamydomonas;Chlamydomonas chlamydogama, Strain SAG 11-48b	PF03028	Dynein heavy chain						0	10	53
contig_106991_1_454_+	497	454													PITG_04104T0-supercont15	21.38	Putative uncharacterized protein	CAM_CRCL_15879	Phytophthora infestans	4787	Eukaryota	Archaeplastida	93930	359	0.6109	5	5	Eukaryota;Archaeplastida;Chlorophyta;Prasinophyceae;Prasinophyceae_X;Prasinophyceae_XX;Prasinophyceae_XXX;Prasinophyceae RCC1871								0	0	98
contig_107242_1_328_-	328	328	phu:Phum_PHUM320330	zinc finger protein 585B, putative						E0VMX6					CAMPEP_0184483392-CAMNT_0026863755	30.56			Norrisiella sphaerica, Strain BC52	91329	Eukaryota	Archaeplastida	93930	359	0.526	4	4	Eukaryota;Archaeplastida;Rhodophyta;Florideophyceae;Corallinales;Corallinales_X;Calliarthron;Calliarthron tuberculosum	PF12874	PF12874						0	6	53
contig_107512_1_432_-	492	432													CAMPEP_0184707332-CAMNT_0027168907	51.52			Porphyridium aerugineum	2792	Eukaryota	Archaeplastida	93930	359	1	1	1	Eukaryota;Archaeplastida;Rhodophyta;Porphyridiophyceae;Porphyridiales;Porphyridiales_X;Porphyridium;Porphyridium aerugineum								0	3	82
contig_108092_196_936_-	1371	741	olu:OSTLU_13349	hypothetical protein						A4S940	KOG0023	Alcohol dehydrogenase, class V	Secondary metabolites biosynthesis, transport and catabolism	METABOLISM	CAMPEP_0200900640-CAMNT_0047087155	50			Tetraselmis striata, Strain LANL1001	3165	Eukaryota	Archaeplastida	93930	359	0.738	5	4	Eukaryota;Archaeplastida;Chlorophyta;Chlorodendrophyceae;Chlorodendrales;Chlorodendrales_X;Tetraselmis;Tetraselmis chuii, Strain PLY429	_GAP_||PF00107||_GAP_	_GAP_||Zinc-binding dehydrogenase||_GAP_						0	6	168
contig_108235_1168_1620_+	2119	453													CAMPEP_0197512808-CAMNT_0043060919	33.8			Prasinophyceae sp. RCC2335	1411624	Eukaryota	Archaeplastida	93930	359	1	1	1	Eukaryota;Archaeplastida;Chlorophyta;Prasinophyceae;unclassified Prasinophyceae;unclassified Prasinophyceae_X;unclassified Prasinophyceae_XX;Prasinophyceae sp. RCC2335								0	1	77
contig_108235_1_904_-	2119	904													CAMPEP_0119157764-CAMNT_0007150383	32.16			Prasinophyceae sp. RCC2339	-311193	Eukaryota	Archaeplastida	93930	359	0.8833	2	2	Eukaryota;Archaeplastida;Chlorophyta;Prasinophyceae;Prasinophyceae_X;Prasinophyceae_XX;Prasinophyceae_XXX;Prasinophyceae CCMP2111								0	1	114
contig_108489_1_944_-	1719	944													CAMPEP_0182618654-CAMNT_0024838877	32.61			Picochlorum RCC944	464278	Eukaryota	Archaeplastida	93930	359	1	1	1	Eukaryota;Archaeplastida;Chlorophyta;Trebouxiophyceae;Chlorellales;Chlorellales_X;Picochlorum;Picochlorum RCC944								0	12	222
contig_108786_167_955_-	1157	789									KOG1616	Protein involved in Snf1 protein kinase complex assembly	Carbohydrate transport and metabolism	METABOLISM	CAMPEP_0198737194-CAMNT_0044501051	25.88			Cyanoptycaceae	-283599	Eukaryota	Archaeplastida	93930	359	0.7203	6	5	Eukaryota;Archaeplastida;Rhodophyta;Stylonematophyceae;Porphyridiales-2;Stylonematales-Group-II;Rhodosorus;Rhodosorus marinus CCMP769								0	2	219
contig_109086_949_1893_-	1894	945									KOG0381	HMG box-containing protein	General function prediction only	POORLY CHARACTERIZED	gi412985385-FO082267	53.57	CG4797		Bathycoccus prasinos, Strain RCC716	41875	Eukaryota	Archaeplastida	93930	359	0.8165	12	10	Eukaryota;Archaeplastida;Chlorophyta;Mamiellophyceae;Mamiellales;Bathycoccaceae;Bathycoccus;Bathycoccus prasinos BCC99000	PF09011	Domain of unknown function (DUF1898)						0	18	672
contig_109191_1153_1572_+	1717	420													ORF170493-Lotgi1	39.68	hypothetical protein	CAM_CRCL_6253129	Lottia gigantea	225164	Eukaryota	Archaeplastida	93930	359	0.684	6	4	Eukaryota;Archaeplastida;Chlorophyta;Chlorophyceae;Chlorophyceae_X;CW-Chlamydomonadales;Polytomella;Polytomella parva								0	1	203
contig_109328_273_833_-	1325	561													GB18727-PA-Group45	68.45	similar to CG5362-PA	CAM_CRCL_3540	Apis mellifera	7460	Eukaryota	Archaeplastida	93930	359	0.6593	4	4	Eukaryota;Opisthokonta;Metazoa;Arthropoda;Hexapoda;Insecta;Apis;Apis mellifera	PF02866	lactate/malate dehydrogenase, alpha/beta C-terminal domain						0	19	135
contig_109338_1_1014_+	1802	1014													CAMPEP_0197445664-CAMNT_0042976659	34			Triceratium dubium, Strain CCMP147	1003142	Eukaryota	Archaeplastida	93930	359	0.4636	3	3	Eukaryota;Archaeplastida;Chlorophyta;Prasino-Clade-VII;Prasino-Clade-VII_X;Prasino-Clade-VII-C;Picocystis;Picocystis salinarum CCMP1897	_GAP_||PF13450||_GAP_	_GAP_||PF13450||_GAP_						0	0	267
contig_109558_1090_1326_+	1503	237	rno:287524	Rpa1, Cb1-727; replication protein A1; K07466 replication factor A1							KOG0851	Single-stranded DNA-binding replication protein A (RPA), large (70 kD) subunit and related ssDNA-binding proteins	Replication, recombination and repair	INFORMATION STORAGE AND PROCESSING	CAMPEP_0198214332-CAMNT_0043889469	45			Pyramimonas, Strain CCMP2087	36898	Eukaryota	Archaeplastida	93930	359	0.774	3	3	Eukaryota;Archaeplastida;Chlorophyta;Pyramimonadales;Pyramimonadales_X;Pyramimonadales_XX;Pyramimonas;Pyramimonas obovata CCMP722	PF08646	Replication factor-A C terminal domain						0	8	112
contig_109870_416_1048_-	1049	633	vcn:VOLCADRAFT_82548	sdc1; serine decarboxylase; K01590 histidine decarboxylase [EC:4.1.1.22]							KOG0629	Glutamate decarboxylase and related proteins	Amino acid transport and metabolism	METABOLISM	CAMPEP_0117689856-CAMNT_0005502795	46.25			Tetraselmis astigmatica, Strain CCMP880	1074897	Eukaryota	Archaeplastida	93930	359	0.7157	16	15	Eukaryota;Archaeplastida;Chlorophyta;Chlorodendrophyceae;Chlorodendrales;Chlorodendrales_X;Tetraselmis;Tetraselmis astigmatica, Strain CCMP880	PF00282||_GAP_	Pyridoxal-dependent decarboxylase conserved domain||_GAP_						0	2	126
contig_110006_1_1168_-	1169	1168									KOG1399	Flavin-containing monooxygenase	Secondary metabolites biosynthesis, transport and catabolism	METABOLISM	CAMPEP_0206133294-CAMNT_0053524851	33.7			Pycnococcus provasolii RCC251	-311181	Eukaryota	Archaeplastida	93930	359	0.9693	3	3	Eukaryota;Archaeplastida;Chlorophyta;Prasino-Clade-V;Prasino-Clade-V_X;Pycnococcaceae;Pycnococcus;Pycnococcus provasolii RCC2336	_GAP_||PF00743	_GAP_||Flavin-binding monooxygenase-like						1	4	465
contig_110129_1_911_-	911	911	tps:THAPSDRAFT_2292	hypothetical protein						B8BTY5					CAMPEP_0185854928-CAMNT_0028556811	54.42			Erythrolobus madagascarensis, Strain CCMP3276	708628	Eukaryota	Archaeplastida	93930	359	0.774	3	3	Eukaryota;Archaeplastida;Rhodophyta;Rhodophyceae;Porphyridiales-1;Porphyridiaceae;Erythrolobus;Erythrolobus australicus, Strain CCMP3124	_GAP_||PF05721||_GAP_	_GAP_||Phytanoyl-CoA dioxygenase (PhyH)||_GAP_						0	10	162
contig_110148_1_918_-	1280	918													GRMZM2G145085_P01-9AGPv2	27.37		CAM_CRCL_4011595	Zea mays	4577	Eukaryota	Archaeplastida	93930	359	1	1	1	Eukaryota;Archaeplastida;Streptophyta;Embryophyceae;Embryophyceae_X;Embryophyceae_XX;Zea;Zea mays								0	2	126
contig_110196_1_756_+	1612	756	vcn:VOLCADRAFT_93102	hypothetical protein											jgi_93102_7122.m000070-Volca1	21.43	membrane protein		Volvox carteri	3067	Eukaryota	Archaeplastida	93930	359	1	1	1	Eukaryota;Archaeplastida;Chlorophyta;Chlorophyceae;Chlorophyceae_X;CW-Chlamydomonadales;Volvox;Volvox carteri								0	8	347
contig_110283_370_963_-	1015	594													CAMPEP_0190205410-CAMNT_0033918573	32.69			Micromonas sp. NEPCC29	-311216	Eukaryota	Archaeplastida	93930	359	1	1	1	Eukaryota;Archaeplastida;Chlorophyta;Mamiellophyceae;Mamiellales;Mamiellaceae;Micromonas;Micromonas sp. NEPCC29								1	9	605
contig_110470_1053_2036_+	2229	984	ppp:PHYPADRAFT_135585	ERL1c; ERL1c AtERECTA-like receptor S/T protein kinase protein						A9SUR2					fgenesh2_kg.1__3648__AT1G35710.1-1Araly1	33.94		CAM_CRCL_21659	Arabidopsis lyrata	59689	Eukaryota	Archaeplastida	93930	359	1	1	1	Eukaryota;Archaeplastida;Streptophyta;Brassicales;Brassicaceae;Camelineae;Arabidopsis;Arabidopsis lyrata	PF00560||_GAP_	Leucine Rich Repeat||_GAP_						0	2	238
contig_110609_2013_2882_+	2884	870													CAMPEP_0203039988-CAMNT_0049782861	28.72			Micromonas pusilla CCMP1723	-311176	Eukaryota	Archaeplastida	93930	359	1	1	1	Eukaryota;Archaeplastida;Chlorophyta;Mamiellophyceae;Mamiellales;Mamiellaceae;Micromonas;Micromonas pusilla CCMP1723								0	0	147
contig_110613_1154_2143_+	2303	990													CAMPEP_0197475658-CAMNT_0043015761	32.26			Prasinophyceae sp. RCC998	464263	Eukaryota	Archaeplastida	93930	359	1	1	1	Eukaryota;Archaeplastida;Chlorophyta;Prasinophyceae;unclassified Prasinophyceae;unclassified Prasinophyceae_X;unclassified Prasinophyceae_XX;Prasinophyceae sp. RCC998								0	8	490
contig_110632_1_995_+	1023	995	dgr:Dgri_GH12605	GH12605 gene product from transcript GH12605-RA						B4JK74					CAMPEP_0186642000-CAMNT_0029498437	27.56			Aurantiochytrium limacinum ATCCMYA1381	87120	Eukaryota	Archaeplastida	93930	359	0.5786	3	3	Eukaryota;Archaeplastida;Rhodophyta;Rhodophyceae;Porphyridiales-1;Porphyridiaceae;Erythrolobus;Erythrolobus madagascarensis, Strain CCMP3276								0	11	178
contig_110676_1_1083_+	1613	1083													fgenesh2_kg.5__2700__AT3G62010.1-5Araly1	30.55		CAM_CRCL_4065633	Arabidopsis lyrata	59689	Eukaryota	Archaeplastida	93930	359	0.8606	5	3	Eukaryota;Archaeplastida;Streptophyta;Brassicales;Brassicaceae;Camelineae;Arabidopsis;Arabidopsis thaliana	_GAP_||PF14566||_GAP_	_GAP_||PF14566||_GAP_						0	28	607
contig_110841_250_1005_+	1269	756													100206964-hmg543	32.63	UPF0430 protein CG31712-like		Hydra magnipapillata	6085	Eukaryota	Archaeplastida	93930	359	0.6808	3	3	Eukaryota;Opisthokonta;Metazoa;Arthropoda;Hexapoda;Insecta;Apis;Apis mellifera								0	0	207
contig_110917_75_1001_+	1020	927	vcn:VOLCADRAFT_98168	hypothetical protein											CAMPEP_0119314796-CAMNT_0007319995	42.04			Scyphosphaera apsteinii, Strain RCC1455	418940	Eukaryota	Archaeplastida	93930	359	0.684	2	2	Eukaryota;Archaeplastida;Chlorophyta;Mamiellophyceae;Mamiellales;Mamiellaceae;Micromonas;Micromonas pusilla CCMP1723	_GAP_||PF05050	_GAP_||Protein of unknown function (DUF672)	_GAP_||TIGR01444||_GAP_	_GAP_||methyltransferase, FkbM family||_GAP_				0	2	177
contig_110960_181_618_+	1083	438	tet:TTHERM_00836580 || tet:TTHERM_00348510	Tubulin/FtsZ family, GTPase domain containing protein; K07375 tubulin beta || Tubulin beta chain, putative; K07375 tubulin beta							KOG1375	Beta tubulin	Cytoskeleton	CELLULAR PROCESSES AND SIGNALING	gi5263;-TTA	92.36	tubulin beta chain (Beta-tubulin).	CAM_CRCL_26955294	Tetrahymena thermophila	5911	Eukaryota	Archaeplastida	93930	359	0.5199	132	64	Eukaryota;Archaeplastida;Streptophyta;Embryophyceae;Embryophyceae_X;Embryophyceae_XX;Selaginella;Selaginella moellendorffii	PF00091||_GAP_||PF03953	Tubulin/FtsZ family, GTPase domain||_GAP_||Tubulin C-terminal domain						0	1	79
contig_111120_1_628_-	628	628	cps:CPS_2366	lipase/acylhydrolase domain-containing protein						Q482D4					CAMPEP_0119121572-CAMNT_0007111143	39.62			Prasinophyceae sp. RCC2339	-311193	Eukaryota	Archaeplastida	93930	359	1	1	1	Eukaryota;Archaeplastida;Chlorophyta;Prasinophyceae;unclassified Prasinophyceae;unclassified Prasinophyceae_X;unclassified Prasinophyceae_XX;Prasinophyceae sp. RCC2339	_GAP_||PF13472	_GAP_||PF13472						0	2	92
contig_111166_144_689_-	1009	546													CAMPEP_0190211326-CAMNT_0033924975	45.98			Micromonas sp. NEPCC29	-311216	Eukaryota	Archaeplastida	93930	359	1	1	1	Eukaryota;Archaeplastida;Chlorophyta;Mamiellophyceae;Mamiellales;Mamiellaceae;Micromonas;Micromonas sp. NEPCC29								0	0	221
contig_111266_1_615_+	649	615	phu:Phum_PHUM446350	krueppel c2h2-type zinc finger protein, putative; K09228 KRAB domain-containing zinc finger protein		K09228	KRAB domain-containing zinc finger protein			E0VU67					PHUM446350-PA-DS235780PhumU1	29.24	krueppel c2h2-type zinc finger protein,putative	CAM_CRCL_1433	Pediculus humanus	121225	Eukaryota	Archaeplastida	93930	359	0.6026	4	4	Eukaryota;Opisthokonta;Metazoa;Arthropoda;Hexapoda;Insecta;Pediculus;Pediculus humanus	_GAP_||PF00096||PF13894||_GAP_||PF00096||_GAP_	_GAP_||Zinc finger, C2H2 type||PF13894||_GAP_||Zinc finger, C2H2 type||_GAP_						0	3	90
contig_111293_1_551_+	738	551													CAMPEP_0181230680-CAMNT_0023324517	37.21			Haptolina ericina	156174	Eukaryota	Archaeplastida	93930	359	0.57	8	8	Eukaryota;Archaeplastida;Chlorophyta;Prasinophyceae;Prasinophyceae_X;Prasinophyceae_XX;Prasinophyceae_XXX;Prasinophyceae CCMP2111								0	20	194
contig_111321_1_1010_+	1336	1010									KOG0580	Serine/threonine protein kinase	Cell cycle control, cell division, chromosome partitioning	CELLULAR PROCESSES AND SIGNALING	BRAFLDRAFT_61299-bfo849	82.04	hypothetical protein		Branchiostoma floridae	7739	Eukaryota	Archaeplastida	93930	359	0.6808	3	3	Eukaryota;Opisthokonta;Metazoa;Cephalochordata;Cephalochordata_X;Cephalochordata_XX;Branchiostoma;Branchiostoma floridae	_GAP_||PF00069	_GAP_||Protein kinase domain						0	6	301
contig_111555_955_1194_-	1232	240									KOG0548	Molecular co-chaperone STI1	Posttranslational modification, protein turnover, chaperones	CELLULAR PROCESSES AND SIGNALING	CAMPEP_0174259432-CAMNT_0015343319	52.11			Stereomyxa ramosa, Strain Chinc5	-289816	Eukaryota	Archaeplastida	93930	359	0.7038	9	8	Eukaryota;Archaeplastida;Chlorophyta;Mamiellophyceae;Mamiellales;Mamiellaceae;Micromonas;Micromonas sp. CCMP2099	PF13414	PF13414						0	12	41
contig_111578_1_458_+	458	458													CAMPEP_0184686004-CAMNT_0027140661	35.65			Compsopogon caeruleus	31354	Eukaryota	Archaeplastida	93930	359	1	1	1	Eukaryota;Archaeplastida;Rhodophyta;Compsopogonophyceae;Compsopogonales;Compsopogonales_X;Compsopogon;Compsopogon caeruleus	_GAP_||PF13894||PF13909	_GAP_||PF13894||PF13909						0	0	66
contig_111780_340_990_-	1519	651													CAMPEP_0187176368-CAMNT_0030162359	30.25			Chattonella subsalsa CCMP2191	44440	Eukaryota	Archaeplastida	93930	359	0.6221	6	6	Eukaryota;Archaeplastida;Chlorophyta;Chlorodendrophyceae;Chlorodendrales;Chlorodendrales_X;Tetraselmis;Tetraselmis astigmatica, Strain CCMP880	PF00059||_GAP_	Lectin C-type domain||_GAP_						0	11	547
contig_111973_177_606_-	606	430													129871-Bigna1_scaffold_10	44.83			Bigelowiella natans, Strain CCMP1242	227086	Eukaryota	Archaeplastida	93930	359	0.6808	3	3	Eukaryota;Archaeplastida;Rhodophyta;Stylonematophyceae;Porphyridiales-2;Stylonematales-Group-II;Rhodosorus;Rhodosorus marinus CCMP769	PF00096||PF13909||PF13465||PF00096||PF13465||PF00096||PF13465	Zinc finger, C2H2 type||PF13909||PF13465||Zinc finger, C2H2 type||PF13465||Zinc finger, C2H2 type||PF13465						0	2	64
contig_112052_234_651_-	651	418	dan:Dana_GF24085	GF24085 gene product from transcript GF24085-RA						B3MAC3					CAMPEP_0198733146-CAMNT_0044496399	43.64			Cyanoptycaceae	-283599	Eukaryota	Archaeplastida	93930	359	1	1	1	Eukaryota;Archaeplastida;Rhodophyta;Unclassified_Rhodophyta;Unclassified_Rhodophyta_X;Unclassified_Rhodophyta_XX;Coastal Red Alga;Cyanoptycaceae sp.								0	10	229
contig_112084_1_417_+	417	417													CAMPEP_0196278156-CAMNT_0041578413	33.96			Prasinococcus capsulatus, Strain CCMP1194	156131	Eukaryota	Archaeplastida	93930	359	1	1	1	Eukaryota;Archaeplastida;Chlorophyta;Prasinococcales;Prasinococcales_X;Prasinococcales-Clade-A;Prasinococcus;Prasinococcus capsulatus, Strain CCMP1194								0	3	82
contig_112193_67_1004_+	1005	938	ppp:PHYPADRAFT_145218	hypothetical protein						A9TGG0					CAMPEP_0174710176-CAMNT_0015908943	26.99			Chrysochromulina brevifilum, Strain UTEX LB 985	156173	Eukaryota	Archaeplastida	93930	359	0.7491	4	4	Eukaryota;Archaeplastida;Streptophyta;Brassicales;Brassicaceae;Camelineae;Arabidopsis;Arabidopsis lyrata	_GAP_||PF00560||_GAP_	_GAP_||Leucine Rich Repeat||_GAP_						0	4	139
contig_112245_105_474_-	474	370									KOG2650	Zinc carboxypeptidase	Function unknown	POORLY CHARACTERIZED	CAMPEP_0197866748-CAMNT_0043485337	46.72			Pterosperma, Strain CCMP1384	1461541	Eukaryota	Archaeplastida	93930	359	1	1	1	Eukaryota;Archaeplastida;Chlorophyta;Pyramimonadales;Pyramimonadales_X;Pyramimonadales_XX;Pterosperma;Pterosperma, Strain CCMP1384	PF00246	Zinc carboxypeptidase						0	0	76
contig_112310_1_515_-	569	515	olu:OSTLU_13842	hypothetical protein						A4RRG3					CAMPEP_0181360390-CAMNT_0023473657	39.77			Mantoniella antarctica, Strain SL-175	81844	Eukaryota	Archaeplastida	93930	359	0.6116	5	5	Eukaryota;Archaeplastida;Chlorophyta;Mamiellophyceae;Mamiellales;Mamiellaceae;Mantoniella;Mantoniella antarctica, Strain SL-175	_GAP_||PF12957	_GAP_||PF12957						0	0	51
contig_112615_1_641_+	726	641									KOG1678	60s ribosomal protein L15	Translation, ribosomal structure and biogenesis	INFORMATION STORAGE AND PROCESSING	RCOM_1500860-rcu615	67.65	ribosomal protein L15, putative		Ricinus communis	3988	Eukaryota	Archaeplastida	93930	359	0.6057	64	46	Eukaryota;Archaeplastida;Streptophyta;Embryophyceae;Embryophyceae_X;Embryophyceae_XX;Zea;Zea mays	PF00827	Ribosomal L15						0	3	106
contig_112628_1_497_-	497	497	ddi:DDB_G0271626	dotA; DOT1 domain-containing protein						Q55AX2					CAMPEP_0175070286-CAMNT_0016337391	31.75			Polytomella parva	51329	Eukaryota	Archaeplastida	93930	359	0.6173	17	11	Eukaryota;Archaeplastida;Chlorophyta;Chlorophyceae;Chlorophyceae_X;CW-Chlamydomonadales;Polytomella;Polytomella parva								0	2	154
contig_112863_1_1082_-	1083	1082													CAMPEP_0182914530-CAMNT_0025051311	25.94			Nephroselmis pyriformis, Strain CCMP717	156128	Eukaryota	Archaeplastida	93930	359	1	2	1	Eukaryota;Archaeplastida;Chlorophyta;Nephroselmidophyceae;Nephroselmidophyceae_X;Nephroselmidaceae;Nephroselmis;Nephroselmis pyriformis, Strain CCMP717	_GAP_||PF00754||_GAP_	_GAP_||F5/8 type C domain||_GAP_						0	0	178
contig_112921_1_801_+	801	801													SCHCODRAFT_82283-scm1686	27.12	hypothetical protein		Schizophyllum commune H4-8	578458	Eukaryota	Archaeplastida	93930	359	0.571	6	6	Eukaryota;Archaeplastida;Chlorophyta;Mamiellophyceae;Mamiellales;Bathycoccaceae;Bathycoccus;Bathycoccus prasinos CCMP1898								0	5	159
contig_113201_1_771_+	893	771									KOG1370	S-adenosylhomocysteine hydrolase	Coenzyme transport and metabolism	METABOLISM	CAMPEP_0193496364-CAMNT_0037953315	86.33			Undescribed sp D1	-289870	Eukaryota	Archaeplastida	93930	359	0.5458	7	7	Eukaryota;Archaeplastida;Rhodophyta;Compsopogonophyceae;Erythropeltidales;Erythrotrichiaceae;Madagascaria;Madagascaria erythrocladioides	PF00670||_GAP_	S-adenosyl-L-homocysteine hydrolase, NAD binding domain||_GAP_						0	9	162
contig_113338_1384_1757_+	1758	374													CAMPEP_0197373780-CAMNT_0042897491	40			Pinguiococcus pyrenoidosus, Strain CCMP2078	172671	Eukaryota	Archaeplastida	93930	359	0.684	2	2	Eukaryota;Archaeplastida;Rhodophyta;Rhodellophyceae;Rhodellales;Rhodellales_X;Rhodella;Rhodella maculata CCMP736								0	9	200
contig_113367_1_903_-	1305	903	vcn:VOLCADRAFT_65699	hypothetical protein; K01953 asparagine synthase (glutamine-hydrolysing) [EC:6.3.5.4]							KOG0571	Asparagine synthase (glutamine-hydrolyzing)	Amino acid transport and metabolism	METABOLISM	CAMPEP_0202866500-CAMNT_0049546453	67.66			Chlamydomonas leiostraca, Strain SAG 11-49	1034604	Eukaryota	Archaeplastida	93930	359	0.7099	14	14	Eukaryota;Archaeplastida;Chlorophyta;Chlorophyceae;Chlorophyceae_X;CW-Chlamydomonadales;Chlamydomonas;Chlamydomonas chlamydogama, Strain SAG 11-48b	PF00733||_GAP_	Asparagine synthase||_GAP_						0	11	1135
contig_113429_1434_1697_+	1780	264	isc:IscW_ISCW000201	zinc finger protein, putative						B7P6S8	KOG1721	FOG: Zn-finger	General function prediction only	POORLY CHARACTERIZED	CAMPEP_0185832092-CAMNT_0028530231	37.7			Erythrolobus australicus, Strain CCMP3124	1077150	Eukaryota	Archaeplastida	93930	359	0.684	2	2	Eukaryota;Archaeplastida;Rhodophyta;Rhodophyceae;Porphyridiales-1;Porphyridiaceae;Erythrolobus;Erythrolobus australicus, Strain CCMP3124								0	0	63
contig_113490_1_1078_+	1090	1078									KOG0028	Ca2+-binding protein (centrin/caltractin), EF-Hand superfamily protein	Cytoskeleton	CELLULAR PROCESSES AND SIGNALING	379819-xla519	28.05	cen1, cetn, cetn2; centrin, EF-hand protein, 1		Xenopus laevis	8355	Eukaryota	Archaeplastida	93930	359	0.5402	12	11	Eukaryota;Archaeplastida;Streptophyta;Embryophyceae;Embryophyceae_X;Embryophyceae_XX;Ricinus;Ricinus communis								0	15	247
contig_113507_1002_1281_+	1282	280													CAMPEP_0190751614-CAMNT_0034577209	45.28			Picocystis salinarum CCMP1897	88271	Eukaryota	Archaeplastida	93930	359	1	1	1	Eukaryota;Archaeplastida;Chlorophyta;Prasino-Clade-VII;Prasino-Clade-VII_X;Prasino-Clade-VII-C;Picocystis;Picocystis salinarum CCMP1897								0	7	221
contig_113602_66_637_-	637	572	pop:POPTR_644880 || pop:POPTR_671531 || pop:POPTR_664306 || rcu:RCOM_1345500 || rcu:RCOM_1345530 || vvi:100242458 || vvi:100267487 || vvi:100242677	ARF family protein; K07977 Arf/Sar family, other || ARF family protein || ARF family protein || ADP-ribosylation factor, arf, putative; K07977 Arf/Sar family, other || ADP-ribosylation factor, arf, putative || similar to ADP-ribosylation factor; K07977 Arf/Sar family, other || similar to ADP-ribosylation factor || similar to ADP-ribosylation factor							KOG0070	GTP-binding ADP-ribosylation factor Arf1	Intracellular trafficking, secretion, and vesicular transport	CELLULAR PROCESSES AND SIGNALING	CAMPEP_0194003512-CAMNT_0038630281	86.11			Gloeochaete witrockiana SAG46_84	38269	Eukaryota	Archaeplastida	93930	359	0.6458	108	64	Eukaryota;Archaeplastida;Streptophyta;Embryophyceae;Embryophyceae_X;Embryophyceae_XX;Zea;Zea mays	PF00025	ADP-ribosylation factor family	TIGR00231	small GTP-binding protein domain	IISP		2	0	3	152
contig_113755_993_1523_-	1554	531	ppp:PHYPADRAFT_143618	hypothetical protein						A9TCQ8	KOG1987	Speckle-type POZ protein SPOP and related proteins with TRAF, MATH and BTB/POZ domains	Cell cycle control, cell division, chromosome partitioning	CELLULAR PROCESSES AND SIGNALING	fgenesh2_kg.6__1918__AT5G19000.1-6Araly1	43.48		CAM_CRCL_55546	Arabidopsis lyrata	59689	Eukaryota	Archaeplastida	93930	359	0.8587	6	5	Eukaryota;Archaeplastida;Streptophyta;Embryophyceae;Embryophyceae_X;Embryophyceae_XX;Sorghum;Sorghum bicolor	PF00651||_GAP_	BTB/POZ domain||_GAP_						0	0	214
contig_113796_992_1639_-	1724	648	nve:NEMVE_v1g196399	hypothetical protein						A7RFG4					NEMVEDRAFT_v1g196399-PA-scaffold_2Nemve1	36.5	Predicted protein [Source:UniProtKB/TrEMBL;Acc:A7RFG4]	CAM_CRCL_4029036	Nematostella vectensis	45351	Eukaryota	Archaeplastida	93930	359	0.684	2	2	Eukaryota;Archaeplastida;Rhodophyta;Compsopogonophyceae;Erythropeltidales;Erythrotrichiaceae;Madagascaria;Madagascaria erythrocladioides					ESS	sodium ion:glutamate symporter	3	4	40	327
contig_113876_1_724_-	975	724	bpm:BURPS1710b_A1320	wbpN; WbpN						Q3JIX6					CAMPEP_0197498970-CAMNT_0043044709	42.26			Prasinophyceae sp. RCC856	464258	Eukaryota	Archaeplastida	93930	359	0.8833	2	2	Eukaryota;Archaeplastida;Chlorophyta;Prasinophyceae;Prasinophyceae_X;Prasinophyceae_XX;Prasinophyceae_XXX;Prasinophyceae RCC701								0	15	136
contig_113903_58_1134_+	1162	1077	ppp:PHYPADRAFT_184505	hypothetical protein; K00856 adenosine kinase [EC:2.7.1.20]	ppp00230||ppp01100	K00856	adenosine kinase [EC:2.7.1.20]	Purine metabolism	2.7.1.20	O49923	KOG2854	Possible pfkB family carbohydrate kinase	Carbohydrate transport and metabolism	METABOLISM	CAMPEP_0206082440-CAMNT_0053462161	51.16			Unidentified sp, Strain CCMP2175	1461546	Eukaryota	Archaeplastida	93930	359	0.5311	63	56	Eukaryota;Archaeplastida;Streptophyta;Embryophyceae;Embryophyceae_X;Embryophyceae_XX;Populus;Populus trichocarpa	PF00294	pfkB family carbohydrate kinase						0	10	297
contig_114082_1118_1246_+	1600	129													CAMPEP_0198197108-CAMNT_0043866269	86.11			Pyramimonas, Strain CCMP2087	36898	Eukaryota	Archaeplastida	93930	359	1	1	1	Eukaryota;Archaeplastida;Chlorophyta;Pyramimonadales;Pyramimonadales_X;Pyramimonadales_XX;Pyramimonas;Pyramimonas, Strain CCMP2087								1	0	59
contig_114187_308_1000_+	1280	693													GRMZM2G478870_P01-10AGPv2	56.14		CAM_CRCL_10370	Zea mays	4577	Eukaryota	Archaeplastida	93930	359	1	3	1	Eukaryota;Archaeplastida;Streptophyta;Embryophyceae;Embryophyceae_X;Embryophyceae_XX;Zea;Zea mays								2	0	324
contig_114406_1_997_+	1257	997									KOG2323	Pyruvate kinase	Carbohydrate transport and metabolism	METABOLISM	evm.model.contig_3426.24-ppurpureum	53.17	hypothetical protein		Porphyridium purpureum	35688	Eukaryota	Archaeplastida	93930	359	0.629	10	10	Eukaryota;Archaeplastida;Rhodophyta;Rhodophyceae;Porphyridiales-1;Porphyridiaceae;Erythrolobus;Erythrolobus australicus, Strain CCMP3124	PF00224||PF02887	Pyruvate kinase, barrel domain||Pyruvate kinase, alpha/beta domain	TIGR01064	pyruvate kinase				0	21	515
contig_114422_1_898_-	898	898													CAMPEP_0198449374-CAMNT_0044172161	34.71			Prasinophyceae RCC701	1461543	Eukaryota	Archaeplastida	93930	359	0.977	2	2	Eukaryota;Archaeplastida;Chlorophyta;Prasinophyceae;Prasinophyceae_X;Prasinophyceae_XX;Prasinophyceae_XXX;Prasinophyceae RCC701								0	3	291
contig_114878_1_848_+	848	848	cre:CHLREDRAFT_192990	hypothetical protein						A8J940					CAMPEP_0202908130-CAMNT_0049597303	63.48			Chlamydomonas chlamydogama, Strain SAG 11-48b	225041	Eukaryota	Archaeplastida	93930	359	0.8141	11	9	Eukaryota;Archaeplastida;Chlorophyta;Chlorodendrophyceae;Chlorodendrales;Chlorodendrales_X;Tetraselmis;Tetraselmis GSL018	PF09418	Protein of unknown function (DUF2009)						0	8	247
contig_114991_277_835_-	835	559	ppp:PHYPADRAFT_226658	hypothetical protein						A9TYG3	KOG0676	Actin and related proteins	Cytoskeleton	CELLULAR PROCESSES AND SIGNALING	CAMPEP_0192423714-CAMNT_0036594107	81.62			Symbiodinium sp C15	226949	Eukaryota	Archaeplastida	93930	359	0.8223	14	9	Eukaryota;Archaeplastida;Streptophyta;Embryophyceae;Embryophyceae_X;Embryophyceae_XX;Zea;Zea mays	PF00022	Actin						0	10	109
contig_115051_117_529_-	529	413													BRAFLDRAFT_127165-bfo3420	26.85	hypothetical protein		Branchiostoma floridae	7739	Eukaryota	Archaeplastida	93930	359	0.684	2	2	Eukaryota;Archaeplastida;Chlorophyta;Prasinophyceae;unclassified Prasinophyceae;unclassified Prasinophyceae_X;unclassified Prasinophyceae_XX;Prasinophyceae sp. RCC998								0	1	104
contig_115212_31_837_-	837	807									KOG1721	FOG: Zn-finger	General function prediction only	POORLY CHARACTERIZED	BRAFLDRAFT_280239-bfo957	28.45	hypothetical protein		Branchiostoma floridae	7739	Eukaryota	Archaeplastida	93930	359	0.6208	5	4	Eukaryota;Archaeplastida;Streptophyta;Embryophyceae;Embryophyceae_X;Embryophyceae_XX;Populus;Populus trichocarpa	_GAP_||PF13894||PF13909||_GAP_	_GAP_||PF13894||PF13909||_GAP_						0	2	183
contig_115364_102_830_+	830	729													100636451-aqu606	31.98	cancer-related nucleoside-triphosphatase homolog		Amphimedon queenslandica	400682	Eukaryota	Archaeplastida	93930	359	0.774	3	3	Eukaryota;Archaeplastida;Chlorophyta;Mamiellophyceae;Mamiellales;Mamiellaceae;Micromonas;Micromonas pusilla RCC2306	PF03266||_GAP_	Protein of unknown function, DUF265||_GAP_						0	0	324
contig_115396_1_633_-	633	633	olu:OSTLU_27075	MFS family transporter: phosphate						A4S6D1	KOG2532	Permease of the major facilitator superfamily	Carbohydrate transport and metabolism	METABOLISM	OSTLU_27075-NC_009367	33.66	MFS family transporter: phosphate	CAM_CRCL_90604	Ostreococcus lucimarinus CCE9901	436017	Eukaryota	Archaeplastida	93930	359	0.819	4	4	Eukaryota;Archaeplastida;Chlorophyta;Mamiellophyceae;Mamiellales;Bathycoccaceae;Ostreococcus;Ostreococcus RCC809	PF07690	Major Facilitator Superfamily			MFS		3	3	0	100
contig_115446_270_653_-	798	384													CAMPEP_0119413136-CAMNT_0007437915	48.68			Chrysoculter rhomboideus, Strain RCC1486	259385	Eukaryota	Archaeplastida	93930	359	0.6399	3	3	Eukaryota;Archaeplastida;Chlorophyta;Mamiellophyceae;Dolichomastigales;Dolichomastigaceae;Dolichomastix;Dolichomastix tenuilepis								0	5	158
contig_115604_59_772_+	950	714									KOG3285	Spindle assembly checkpoint protein	Cell cycle control, cell division, chromosome partitioning	CELLULAR PROCESSES AND SIGNALING	gi412985623-FO082267	51.57	mitotic spindle checkpoint component mad2		Bathycoccus prasinos, Strain RCC716	41875	Eukaryota	Archaeplastida	93930	359	0.774	6	5	Eukaryota;Archaeplastida;Chlorophyta;Mamiellophyceae;Mamiellales;Bathycoccaceae;Bathycoccus;Bathycoccus prasinos, Strain RCC716	PF02301	HORMA domain						0	6	244
contig_116029_1_486_-	548	486	ota:Ot02g00290	polyunsaturated fatty acid elongase 1 (ISS)						Q5SE78	KOG3071	Fatty acyl-CoA elongase/Polyunsaturated fatty acid specific elongation enzyme	Lipid transport and metabolism	METABOLISM	CAMPEP_0195548276-CAMNT_0040682841	70.95			Prasinoderma coloniale, Strain CCMP1413	156133	Eukaryota	Archaeplastida	93930	359	1	1	1	Eukaryota;Archaeplastida;Chlorophyta;Prasinococcales;Prasinococcales_X;Prasinococcales-Clade-B;Prasinoderma;Prasinoderma coloniale, Strain CCMP1413	_GAP_||PF01151	_GAP_||GNS1/SUR4 family						3	3	472
contig_116401_1_715_+	715	715	dan:Dana_GF13135	GF13135 gene product from transcript GF13135-RA						B3MGM7					LOC_Os02g39020.1-2MSU6	27.27	transposon protein, putative, unclassified	CAM_CRCL_4004188	Oryza sativa (japonica cultivar-group) mitochondrial	39947	Eukaryota	Archaeplastida	93930	359	1	1	1	Eukaryota;Archaeplastida;Streptophyta;Embryophyceae;Embryophyceae_X;Embryophyceae_XX;Oryza;Oryza sativa (japonica cultivar-group) mitochondrial	_GAP_||PF02892	_GAP_||BED zinc finger						0	1	135
contig_116438_1_644_-	644	644													PAC:15421329-scaffold_115	28.25		CAM_CRCL_4021997	Selaginella moellendorffii	88036	Eukaryota	Archaeplastida	93930	359	1	4	1	Eukaryota;Archaeplastida;Streptophyta;Embryophyceae;Embryophyceae_X;Embryophyceae_XX;Selaginella;Selaginella moellendorffii								0	0	402
contig_116493_1_743_+	969	743									KOG0371	Serine/threonine protein phosphatase 2A, catalytic subunit	Signal transduction mechanisms	CELLULAR PROCESSES AND SIGNALING	BGIOSGA013766-PA-3Jan_2005	82.4	Japonica Group Os03g0805300 (Os03g0805300) mRNA, complete cds [source:RefSeq_dna;Acc:NM_001058162.1]	CAM_CRCL_4020472	Oryza sativa Indica Group	39946	Eukaryota	Archaeplastida	93930	359	0.5349	126	99	Eukaryota;Archaeplastida;Streptophyta;Embryophyceae;Embryophyceae_X;Embryophyceae_XX;Populus;Populus trichocarpa	_GAP_||PF00149	_GAP_||Calcineurin-like phosphoesterase						0	12	177
contig_116500_1_579_-	579	579									KOG0676	Actin and related proteins	Cytoskeleton	CELLULAR PROCESSES AND SIGNALING	ACA1_219820-acan1128	71.35	putative		Acanthamoeba castellanii str. Neff	1257118	Eukaryota	Archaeplastida	93930	359	0.4957	143	81	Eukaryota;Archaeplastida;Streptophyta;Embryophyceae;Embryophyceae_X;Embryophyceae_XX;Zea;Zea mays	PF00022	Actin						0	5	104
contig_116767_1_758_+	758	758													CAMPEP_0194020100-CAMNT_0038657573	29.27			Gloeochaete witrockiana SAG46_84	38269	Eukaryota	Archaeplastida	93930	359	1	1	1	Eukaryota;Archaeplastida;Glaucocystophyta;Glaucocystophyceae;Glaucocystophytes;Glaucocystophytes_X;Gloeochaete;Gloeochaete witrockiana SAG46_84								0	0	89
contig_11692_1_408_+	408	408	sha:SH0326	hypothetical protein						Q4L9P0					CAMPEP_0191615768-CAMNT_0035640081	30.28			Schizochytrium aggregatum ATCC28209	4773	Eukaryota	Archaeplastida	93930	359	0.684	2	2	Eukaryota;Archaeplastida;Chlorophyta;Mamiellophyceae;Mamiellales;Mamiellaceae;Mantoniella;Mantoniella antarctica, Strain SL-175								0	1327	10
contig_116972_1_671_+	671	671	ppp:PHYPADRAFT_97587	hypothetical protein						A9TUV9					FGENESH1_PG.SCAFFOLD_329000011-scaffold_329Phypa1	31.07	subsp. patens predicted protein (PHYPADRAFT_97587) mRNA, complete cds [source:RefSeq_dna_predicted;Acc:XM_001782339.1]	CAM_CRCL_26977218	Physcomitrella patens	3218	Eukaryota	Archaeplastida	93930	359	0.7893	3	2	Eukaryota;Archaeplastida;Streptophyta;Embryophyceae;Embryophyceae_X;Embryophyceae_XX;Physcomitrella;Physcomitrella patens								0	0	69
contig_117049_132_805_+	805	674													CAMPEP_0184999142-CAMNT_0027526103	40.78			Spumella elongata, Strain CCAP 955	89044	Eukaryota	Archaeplastida	93930	359	0.684	2	2	Eukaryota;Archaeplastida;Chlorophyta;Chlorophyceae;Chlorophyceae_X;CW-Chlamydomonadales;Chlamydomonas;Chlamydomonas chlamydogama, Strain SAG 11-48b	_GAP_||PF13637||_GAP_	_GAP_||PF13637||_GAP_						0	4	57
contig_117180_1_499_-	499	499													CAMPEP_0200926294-CAMNT_0047119773	49.68			Tetraselmis striata, Strain LANL1001	3165	Eukaryota	Archaeplastida	93930	359	1	1	1	Eukaryota;Archaeplastida;Chlorophyta;Chlorodendrophyceae;Chlorodendrales;Chlorodendrales_X;Tetraselmis;Tetraselmis striata, Strain LANL1001								0	0	69
contig_117966_257_633_+	633	377													CAMPEP_0198336514-CAMNT_0044041259	26.88			Madagascaria erythrocladioides	753684	Eukaryota	Archaeplastida	93930	359	1	1	1	Eukaryota;Archaeplastida;Rhodophyta;Compsopogonophyceae;Erythropeltidales;Erythrotrichiaceae;Madagascaria;Madagascaria erythrocladioides								0	0	114
contig_118076_528_908_-	1331	381													GSVIVT01013544001-5IGGP_12x	26.77			Vitis vinifera	29760	Eukaryota	Archaeplastida	93930	359	1	1	1	Eukaryota;Archaeplastida;Streptophyta;Embryophyceae;Embryophyceae_X;Embryophyceae_XX;Vitis;Vitis vinifera								0	5	482
contig_118196_1_915_-	915	915	dan:Dana_GF18428	GF18428 gene product from transcript GF18428-RA						B3M1M5	KOG1488	Translational repressor Pumilio/PUF3 and related RNA-binding proteins (Puf superfamily)	Translation, ribosomal structure and biogenesis	INFORMATION STORAGE AND PROCESSING	CAMPEP_0184307128-CAMNT_0026619541	29.14			Proteomonas sulcata, Strain CCMP704	77928	Eukaryota	Archaeplastida	93930	359	0.605	26	18	Eukaryota;Archaeplastida;Streptophyta;Embryophyceae;Embryophyceae_X;Embryophyceae_XX;Vitis;Vitis vinifera	_GAP_||PF00806||_GAP_	_GAP_||Pumilio-family RNA binding repeat||_GAP_						0	2	281
contig_118416_1_367_-	525	367													CAMPEP_0182618742-CAMNT_0024838971	61.22			Picochlorum RCC944	464278	Eukaryota	Archaeplastida	93930	359	0.6808	3	3	Eukaryota;Archaeplastida;Chlorophyta;Mamiellophyceae;Mamiellales;Mamiellaceae;Micromonas;Micromonas pusilla RCC2306								0	194	1921
contig_118512_1_740_+	809	740													CAMPEP_0206067302-CAMNT_0053443303	26.44			Unidentified, Strain CCMP1205	44458	Eukaryota	Archaeplastida	93930	359	0.8373	2	2	Eukaryota;Archaeplastida;Chlorophyta;Prasino-Clade-V;Prasino-Clade-V_X;Pycnococcaceae;Pycnococcus;Pycnococcus sp, Strain CCM1998								0	7	686
contig_118555_48_915_+	915	868									KOG1190	Polypyrimidine tract-binding protein	RNA processing and modification	INFORMATION STORAGE AND PROCESSING	CAMPEP_0197544488-CAMNT_0043103889	33.56			Partenskyella glossopodia, Strain RCC365	552666	Eukaryota	Archaeplastida	93930	359	0.7146	6	4	Eukaryota;Archaeplastida;Glaucocystophyta;Glaucocystophyceae;Glaucocystophytes;Cyanoptycaceae;Cyanoptyche;Cyanoptyche gloeocystis, Strain SAG4.97	_GAP_||PF13893||_GAP_	_GAP_||PF13893||_GAP_						0	2	619
contig_118579_1_582_+	582	582													CAMPEP_0203076892-CAMNT_0049822599	30.56			Micromonas pusilla CCMP494	-311177	Eukaryota	Archaeplastida	93930	359	0.977	2	2	Eukaryota;Archaeplastida;Chlorophyta;Mamiellophyceae;Mamiellales;Mamiellaceae;Micromonas;Micromonas pusilla CCMP494								0	10	192
contig_118850_1_502_-	572	502	vcn:VOLCADRAFT_81203	hypothetical protein; K10295 F-box protein 9							KOG1947	Leucine rich repeat proteins, some proteins contain F-box	General function prediction only	POORLY CHARACTERIZED	jgi_81203_7112.m000217-Volca1	38.98	hypothetical protein	CAM_CRCL_5006665	Volvox carteri	3067	Eukaryota	Archaeplastida	93930	359	0.684	2	2	Eukaryota;Archaeplastida;Chlorophyta;Chlorophyceae;Chlorophyceae_X;CW-Chlamydomonadales;Volvox;Volvox carteri	PF12937||_GAP_	F-box-like||_GAP_						0	4	182
contig_118859_1_587_-	587	587									KOG3607	Meltrins, fertilins and related Zn-dependent metalloproteinases of the ADAMs family	Posttranslational modification, protein turnover, chaperones	CELLULAR PROCESSES AND SIGNALING	CAMPEP_0197613638-CAMNT_0043182501	40.86			Mamiellaceae RCC2288	1155430	Eukaryota	Archaeplastida	93930	359	0.9099	16	9	Eukaryota;Archaeplastida;Chlorophyta;Mamiellophyceae;Mamiellales;Bathycoccaceae;Ostreococcus;Ostreococcus mediterraneus clade-D-RCC1107	PF01421||_GAP_	Reprolysin (M12B) family zinc metalloprotease ||_GAP_						0	1	414
contig_119081_437_652_+	652	216													CAMPEP_0190740668-CAMNT_0034564703	54.17			Picocystis salinarum CCMP1897	88271	Eukaryota	Archaeplastida	93930	359	1	1	1	Eukaryota;Archaeplastida;Chlorophyta;Prasino-Clade-VII;Prasino-Clade-VII_X;Prasino-Clade-VII-C;Picocystis;Picocystis salinarum CCMP1897								0	25	983
contig_119130_22_840_-	840	819													CAMPEP_0198316384-CAMNT_0044019537	39.41			Madagascaria erythrocladioides	753684	Eukaryota	Archaeplastida	93930	359	1	1	1	Eukaryota;Archaeplastida;Rhodophyta;Compsopogonophyceae;Erythropeltidales;Erythrotrichiaceae;Madagascaria;Madagascaria erythrocladioides								0	8	259
contig_119233_1_764_-	764	764													BRAFLDRAFT_147789-bfo969	36.19	hypothetical protein		Branchiostoma floridae	7739	Eukaryota	Archaeplastida	93930	359	0.684	2	2	Eukaryota;Archaeplastida;Streptophyta;Embryophyceae;Embryophyceae_X;Embryophyceae_XX;Populus;Populus trichocarpa	PF03344||_GAP_	Daxx Family||_GAP_						0	8	274
contig_119250_1_454_+	680	454	dgr:Dgri_GH13073	GH13073 gene product from transcript GH13073-RA						B4JR28					gi412992346-FO082264	34.33	PREDICTED: similar to Zinc finger protein 271 (Zinc finger protein 7) (HZF7) (Zinc finger protein ZNFphex133) (Epstein-Barr virus-induced zinc finger protein) (ZNF-EB) (CT-ZFP48) (Zinc finger protein		Bathycoccus prasinos, Strain RCC716	41875	Eukaryota	Archaeplastida	93930	359	1	3	1	Eukaryota;Archaeplastida;Chlorophyta;Mamiellophyceae;Mamiellales;Bathycoccaceae;Bathycoccus;Bathycoccus prasinos, Strain RCC716	PF13894	PF13894						0	0	92
contig_119398_1_854_+	854	854													CAMPEP_0198681716-CAMNT_0044423811	32.56			Mantoniella sp, Strain CCMP1436	1461545	Eukaryota	Archaeplastida	93930	359	0.659	3	3	Eukaryota;Archaeplastida;Chlorophyta;Mamiellophyceae;Mamiellales;Mamiellaceae;Mantoniella;Mantoniella antarctica, Strain SL-175								1	39	1461
contig_119509_268_915_-	915	648													CAMPEP_0194024672-CAMNT_0038662825	38.64			Gloeochaete witrockiana SAG46_84	38269	Eukaryota	Archaeplastida	93930	359	0.6399	3	3	Eukaryota;Archaeplastida;Chlorophyta;Pyramimonadales;Pyramimonadales_X;Pyramimonadales_XX;Pyramimonas;Pyramimonas obovata CCMP722								0	0	220
contig_119524_2144_2449_+	2522	306													CAMPEP_0203049768-CAMNT_0049793855	65.22			Micromonas pusilla CCMP1723	-311176	Eukaryota	Archaeplastida	93930	359	1	1	1	Eukaryota;Archaeplastida;Chlorophyta;Mamiellophyceae;Mamiellales;Mamiellaceae;Micromonas;Micromonas pusilla CCMP1723								1	11	97
contig_119709_1_912_-	912	912													ENSTNIP00000015150-chromosome:TETRAODON8:1:17990026:18990025:1	30	nucleolin [Source:HGNC Symbol;Acc:7667]	CAM_CRCL_69670	Tetraodon nigroviridis	99883	Eukaryota	Archaeplastida	93930	359	0.5557	5	5	Eukaryota;Archaeplastida;Chlorophyta;Mamiellophyceae;Mamiellales;Bathycoccaceae;Bathycoccus;Bathycoccus prasinos CCMP1898								0	5	222
contig_119769_1_753_-	753	753	nve:NEMVE_v1g227987	hypothetical protein ; K00560 thymidylate synthase [EC:2.1.1.45]	nve01100||nve00240||nve00670	K00560	thymidylate synthase [EC:2.1.1.45]	Pyrimidine metabolism || One carbon pool by folate	2.1.1.45	A7RH38	KOG0673	Thymidylate synthase	Nucleotide transport and metabolism	METABOLISM	NEMVEDRAFT_v1g227987-PA-scaffold_4Nemve1	76.5	Thymidylate synthase [Source:UniProtKB/TrEMBL;Acc:A7RH38]	CAM_CRCL_4004822	Nematostella vectensis	45351	Eukaryota	Archaeplastida	93930	359	0.5163	82	76	Eukaryota;Archaeplastida;Streptophyta;Embryophyceae;Embryophyceae_X;Embryophyceae_XX;Oryza;Oryza glaberrima	PF00303	Thymidylate synthase	TIGR03284	thymidylate synthase				0	5	218
contig_119793_181_717_-	889	537													gw1.23.120.1-C169_V2_scaffold_23	30.39		CAM_CRCL_6012157	Coccomyxa subellipsoidea	248742	Eukaryota	Archaeplastida	93930	359	1	1	1	Eukaryota;Archaeplastida;Chlorophyta;Trebouxiophyceae;Trebouxiophyceae_X;Trebouxiophyceae_XX;Coccomyxa;Coccomyxa subellipsoidea								0	3	363
contig_119806_1_484_-	524	484	vcn:VOLCADRAFT_57643	hypothetical protein; K12795 suppressor of G2 allele of SKP1											jgi_57643_7101.m000154-Volca1	41.73	hypothetical protein	CAM_CRCL_14194387	Volvox carteri	3067	Eukaryota	Archaeplastida	93930	359	0.684	2	2	Eukaryota;Archaeplastida;Chlorophyta;Chlorophyceae;Chlorophyceae_X;CW-Chlamydomonadales;Volvox;Volvox carteri	PF13414||PF07719||_GAP_	PF13414||Tetratricopeptide repeat||_GAP_						0	0	125
contig_119877_1_666_+	666	666													CAMPEP_0197167154-CAMNT_0042615515	38.86			Bathycoccus prasinos CCMP1898	-311198	Eukaryota	Archaeplastida	93930	359	0.8956	4	4	Eukaryota;Archaeplastida;Chlorophyta;Mamiellophyceae;Mamiellales;Bathycoccaceae;Bathycoccus;Bathycoccus prasinos BCC99000	PF03092	BT1 family			FBT		2	3	0	126
contig_119911_1_842_-	842	842													CAMPEP_0206121018-CAMNT_0053511295	36.71			Pycnococcus provasolii RCC251	-311181	Eukaryota	Archaeplastida	93930	359	0.6257	7	6	Eukaryota;Archaeplastida;Chlorophyta;Prasino-Clade-V;Prasino-Clade-V_X;Pycnococcaceae;Pycnococcus;Pycnococcus provasolii RCC2336								0	6	512
contig_120012_1_644_+	644	644													CAMPEP_0196276466-CAMNT_0041576449	36.49			Prasinococcus capsulatus, Strain CCMP1194	156131	Eukaryota	Archaeplastida	93930	359	1	1	1	Eukaryota;Archaeplastida;Chlorophyta;Prasinococcales;Prasinococcales_X;Prasinococcales-Clade-A;Prasinococcus;Prasinococcus capsulatus, Strain CCMP1194								0	9	156
contig_120218_1_878_+	878	878									KOG1721	FOG: Zn-finger	General function prediction only	POORLY CHARACTERIZED	gi412987719-FO082262	27.15	PREDICTED: similar to Zinc finger protein 271 (Zinc finger protein 7) (HZF7) (Zinc finger protein ZNFphex133) (Epstein-Barr virus-induced zinc finger protein) (ZNF-EB) (CT-ZFP48) (Zinc finger protein		Bathycoccus prasinos, Strain RCC716	41875	Eukaryota	Archaeplastida	93930	359	1	1	1	Eukaryota;Archaeplastida;Chlorophyta;Mamiellophyceae;Mamiellales;Bathycoccaceae;Bathycoccus;Bathycoccus prasinos, Strain RCC716	_GAP_||PF00096||_GAP_	_GAP_||Zinc finger, C2H2 type||_GAP_						0	16	468
contig_120470_1_513_+	513	513	phu:Phum_PHUM397860	bric-A-brac, putative						E0VRH5					CAMPEP_0185851544-CAMNT_0028552553	41.18			Erythrolobus madagascarensis, Strain CCMP3276	708628	Eukaryota	Archaeplastida	93930	359	1	1	1	Eukaryota;Archaeplastida;Rhodophyta;Rhodophyceae;Porphyridiales-1;Porphyridiaceae;Erythrolobus;Erythrolobus madagascarensis, Strain CCMP3276								0	3	131
contig_120987_1_498_+	498	498													CAMPEP_0206115520-CAMNT_0053505147	38.67			Unidentified sp, Strain CCMP2175	1461546	Eukaryota	Archaeplastida	93930	359	1	1	1	Eukaryota;Archaeplastida;Chlorophyta;Prasinophyceae;Prasinophyceae_X;Prasinophyceae_XX;Prasinophyceae_XXX;Unidentified sp, Strain CCMP2175								0	0	120
contig_120998_1_480_+	480	480	sse:Ssed_1883	isocitrate dehydrogenase (NADP(+)) (EC:1.1.1.42); K00031 isocitrate dehydrogenase [EC:1.1.1.42]	sse01120||sse00480||sse01110||sse01100||sse00020	K00031	isocitrate dehydrogenase [EC:1.1.1.42]	Citrate cycle (TCA cycle) || Glutathione metabolism || Carbon fixation pathways in prokaryotes || Carbon metabolism || 2-Oxocarboxylic acid metabolism || Biosynthesis of amino acids || Peroxisome	1.1.1.42	A8FUH1					CAMPEP_0117655310-CAMNT_0005461655	63.52			Tetraselmis astigmatica, Strain CCMP880	1074897	Eukaryota	Archaeplastida	93930	359	0.7893	3	2	Eukaryota;Archaeplastida;Chlorophyta;Chlorodendrophyceae;Chlorodendrales;Chlorodendrales_X;Tetraselmis;Tetraselmis astigmatica, Strain CCMP880	PF03971	Monomeric isocitrate dehydrogenase						0	9	52
contig_121004_1_410_+	1705	410													POPTR_0012s13310.1-12JGI2	32.47		CAM_CRCL_4006341	Populus trichocarpa	3694	Eukaryota	Archaeplastida	93930	359	1	1	1	Eukaryota;Archaeplastida;Streptophyta;Embryophyceae;Embryophyceae_X;Embryophyceae_XX;Populus;Populus trichocarpa								0	7	79
contig_121076_1_657_+	657	657													CAMPEP_0177622628-CAMNT_0019122971	25.95			Tetraselmis GSL018	582737	Eukaryota	Archaeplastida	93930	359	0.7472	5	3	Eukaryota;Archaeplastida;Chlorophyta;Chlorodendrophyceae;Chlorodendrales;Chlorodendrales_X;Tetraselmis;Tetraselmis GSL018								0	57	862
contig_121381_415_987_-	2460	573													CAMPEP_0184681072-CAMNT_0027131671	46.15			Compsopogon caeruleus	31354	Eukaryota	Archaeplastida	93930	359	0.8137	3	3	Eukaryota;Archaeplastida;Rhodophyta;Compsopogonophyceae;Compsopogonales;Compsopogonales_X;Compsopogon;Compsopogon caeruleus	PF13894||_GAP_	PF13894||_GAP_						0	13	143
contig_121767_185_928_-	928	744	cnb:CNBE1000	hypothetical protein											26452-ChlNC64A_scaffold_20	30.84			Chlorella variabilis	554065	Eukaryota	Archaeplastida	93930	359	0.6871	16	13	Eukaryota;Archaeplastida;Streptophyta;Embryophyceae;Embryophyceae_X;Embryophyceae_XX;Populus;Populus trichocarpa								0	18	363
contig_121865_105_953_-	1083	849													CAMPEP_0198731158-CAMNT_0044494085	31.82			Cyanoptycaceae	-283599	Eukaryota	Archaeplastida	93930	359	0.6808	3	3	Eukaryota;Opisthokonta;Metazoa;Arthropoda;Hexapoda;Insecta;Acyrthosiphon;Acyrthosiphon pisum	_GAP_||PF04500||_GAP_	_GAP_||FLYWCH zinc finger domain||_GAP_						0	4	535
contig_121877_1_725_-	725	725													CAMPEP_0113957176-CAMNT_0000967665	25			Rhodosorus marinus CCMP769	-311207	Eukaryota	Archaeplastida	93930	359	1	1	1	Eukaryota;Archaeplastida;Rhodophyta;Stylonematophyceae;Porphyridiales-2;Stylonematales-Group-II;Rhodosorus;Rhodosorus marinus CCMP769	_GAP_||PF00892||_GAP_	_GAP_||EamA-like transporter family||_GAP_			DMT		2	5	4	197
contig_121989_34_1391_+	1421	1358	vcn:VOLCADRAFT_109786 || vcn:VOLCADRAFT_77526	tubA2; alpha tubulin; K07374 tubulin alpha || tubA1; alpha tubulin							KOG1376	Alpha tubulin	Cytoskeleton	CELLULAR PROCESSES AND SIGNALING	CAMPEP_0187816298-CAMNT_0030937185	94.29			Euplotes focardii TN1	36767	Eukaryota	Archaeplastida	93930	359	0.5762	122	72	Eukaryota;Archaeplastida;Streptophyta;Embryophyceae;Embryophyceae_X;Embryophyceae_XX;Selaginella;Selaginella moellendorffii	PF00091||_GAP_||PF03953||_GAP_	Tubulin/FtsZ family, GTPase domain||_GAP_||Tubulin C-terminal domain||_GAP_						0	23	804
contig_12201_1_343_+	343	343													CAMPEP_0197500874-CAMNT_0043046657	31.11			Prasinophyceae sp. RCC2335	1411624	Eukaryota	Archaeplastida	93930	359	1	1	1	Eukaryota;Archaeplastida;Chlorophyta;Prasinophyceae;unclassified Prasinophyceae;unclassified Prasinophyceae_X;unclassified Prasinophyceae_XX;Prasinophyceae sp. RCC2335								1	28	249
contig_122049_998_1226_+	1227	229													CAMPEP_0119126942-CAMNT_0007117141	52.05			Prasinophyceae sp. RCC2339	-311193	Eukaryota	Archaeplastida	93930	359	1	1	1	Eukaryota;Archaeplastida;Chlorophyta;Prasinophyceae;unclassified Prasinophyceae;unclassified Prasinophyceae_X;unclassified Prasinophyceae_XX;Prasinophyceae sp. RCC2339								0	2	81
contig_122208_1_329_-	529	329	vcn:VOLCADRAFT_81203	hypothetical protein; K10295 F-box protein 9							KOG2997	F-box protein FBX9	General function prediction only	POORLY CHARACTERIZED	CAMPEP_0206151258-CAMNT_0053548797	47.92			Stichococcus sp, Strain RCC1054	1461547	Eukaryota	Archaeplastida	93930	359	0.8342	6	4	Eukaryota;Archaeplastida;Streptophyta;Embryophyceae;Embryophyceae_X;Embryophyceae_XX;Zea;Zea mays	PF12937||_GAP_	F-box-like||_GAP_						0	0	74
contig_122223_310_786_-	921	477													CAMPEP_0198444478-CAMNT_0044165133	31.65			Synchroma pusillum, Strain CCMP3072	1181717	Eukaryota	Archaeplastida	93930	359	0.684	2	2	Eukaryota;Archaeplastida;Chlorophyta;Trebouxiophyceae;Prasiolales;Prasiolales_X;Stichococcus;Stichococcus sp, Strain RCC1054								0	11	102
contig_12282_1_360_+	360	360	olu:OSTLU_26387	hypothetical protein						A4S4E8					CAMPEP_0198485510-CAMNT_0044213915	56.03			Bathycoccus prasinos, Strain RCC716	41875	Eukaryota	Archaeplastida	93930	359	1	1	1	Eukaryota;Archaeplastida;Chlorophyta;Mamiellophyceae;Mamiellales;Bathycoccaceae;Bathycoccus;Bathycoccus prasinos, Strain RCC716								0	93	6
contig_122912_929_1813_-	1814	885	vcn:VOLCADRAFT_89164	hypothetical protein											jgi_89164_7104.m000248-Volca1	36.99	hypothetical protein	CAM_CRCL_14477972	Volvox carteri	3067	Eukaryota	Archaeplastida	93930	359	0.5029	9	8	Eukaryota;Archaeplastida;Chlorophyta;Chlorodendrophyceae;Chlorodendrales;Chlorodendrales_X;Tetraselmis;Tetraselmis GSL018								0	4	616
contig_123102_1_904_+	904	904	tet:TTHERM_00558620	Tubulin/FtsZ family, GTPase domain containing protein; K07374 tubulin alpha							KOG1376	Alpha tubulin	Cytoskeleton	CELLULAR PROCESSES AND SIGNALING	CAMPEP_0170453798-CAMNT_0010716313	99			Favella ehrenbergii, Strain Fehren 1	182087	Eukaryota	Archaeplastida	93930	359	0.5904	111	63	Eukaryota;Archaeplastida;Streptophyta;Embryophyceae;Embryophyceae_X;Embryophyceae_XX;Selaginella;Selaginella moellendorffii	PF00091||_GAP_||PF03953	Tubulin/FtsZ family, GTPase domain||_GAP_||Tubulin C-terminal domain						0	15	446
contig_123375_1_404_+	404	404													CAMPEP_0119155640-CAMNT_0007148241	31.03			Prasinophyceae sp. RCC2339	-311193	Eukaryota	Archaeplastida	93930	359	1	1	1	Eukaryota;Archaeplastida;Chlorophyta;Prasinophyceae;unclassified Prasinophyceae;unclassified Prasinophyceae_X;unclassified Prasinophyceae_XX;Prasinophyceae sp. RCC2339								0	2	58
contig_123401_1_454_-	454	454													CAMPEP_0170632270-CAMNT_0010960947	63.06			Togula jolla, Strain CCCM 725	285029	Eukaryota	Archaeplastida	93930	359	0.4146	5	5	Eukaryota;Archaeplastida;Chlorophyta;Chlorodendrophyceae;Chlorodendrales;Chlorodendrales_X;Tetraselmis;Tetraselmis striata, Strain LANL1001	PF09996	Uncharacterized protein conserved in bacteria (DUF2237)						0	0	234
contig_123443_1_424_+	424	424													CAMPEP_0198467274-CAMNT_0044193289	50.79			Prasinophyceae RCC1871	1461544	Eukaryota	Archaeplastida	93930	359	0.8373	2	2	Eukaryota;Archaeplastida;Chlorophyta;Prasino-Clade-V;Prasino-Clade-V_X;Pycnococcaceae;Pycnococcus;Pycnococcus sp, Strain CCM1998								0	7	225
contig_124892_1_456_+	532	456									KOG2586	Pyridoxamine-phosphate oxidase	Coenzyme transport and metabolism	METABOLISM	DappuP129869-scaffold_99Dappu1	52.6		CAM_CRCL_293	Daphnia pulex	6669	Eukaryota	Archaeplastida	93930	359	0.5742	7	7	Eukaryota;Archaeplastida;Streptophyta;Embryophyceae;Embryophyceae_X;Embryophyceae_XX;Oryza;Oryza glaberrima	PF01243||_GAP_||PF10590	Pyridoxamine 5'-phosphate oxidase||_GAP_||Pyridoxine 5'-phosphate oxidase C-terminal dimerisation region	TIGR00558	pyridoxamine 5'-phosphate oxidase				0	0	293
contig_125293_1_333_+	333	333													TVAG_259330-tva2313	29.67	hypothetical protein		Trichomonas vaginalis G3	412133	Eukaryota	Archaeplastida	93930	359	0.684	2	2	Eukaryota;Archaeplastida;Chlorophyta;Chlorophyceae;Chlorophyceae_X;CW-Chlamydomonadales;Polytomella;Polytomella parva								0	0	91
contig_125541_66_1006_-	1007	941	nve:NEMVE_v1g14887	hypothetical protein						A7SNE6					CAMPEP_0198722382-CAMNT_0044483287	38.68			Cyanoptycaceae	-283599	Eukaryota	Archaeplastida	93930	359	1	1	1	Eukaryota;Archaeplastida;Rhodophyta;Unclassified_Rhodophyta;Unclassified_Rhodophyta_X;Unclassified_Rhodophyta_XX;Coastal Red Alga;Cyanoptycaceae sp.								0	73	1070
contig_125659_1_395_+	395	395	vcn:VOLCADRAFT_86388	hypothetical protein							KOG1947	Leucine rich repeat proteins, some proteins contain F-box	General function prediction only	POORLY CHARACTERIZED	jgi_86388_7095.m000583-Volca1	51.85	MYND finger	CAM_CRCL_4006786	Volvox carteri	3067	Eukaryota	Archaeplastida	93930	359	0.8373	2	2	Eukaryota;Archaeplastida;Chlorophyta;Chlorophyceae;Chlorophyceae_X;CW-Chlamydomonadales;Volvox;Volvox carteri	PF12937||_GAP_	F-box-like||_GAP_						0	6	89
contig_126179_1_747_-	811	747													CAMPEP_0198723172-CAMNT_0044484201	33.02			Cyanoptycaceae	-283599	Eukaryota	Archaeplastida	93930	359	1	1	1	Eukaryota;Archaeplastida;Rhodophyta;Unclassified_Rhodophyta;Unclassified_Rhodophyta_X;Unclassified_Rhodophyta_XX;Coastal Red Alga;Cyanoptycaceae sp.								0	13	354
contig_126213_1_471_+	471	471													GRMZM2G700905_P01-6AGPv2	30.12		CAM_CRCL_21659	Zea mays	4577	Eukaryota	Archaeplastida	93930	359	0.9507	4	3	Eukaryota;Archaeplastida;Streptophyta;Embryophyceae;Embryophyceae_X;Embryophyceae_XX;Zea;Zea mays	PF00560	Leucine Rich Repeat						0	4	396
contig_126523_1_1109_+	2990	1109													LDBPK_220850-NC_018249	24.17	hypothetical protein		Leishmania donovani	5661	Eukaryota	Archaeplastida	93930	359	0.5786	3	3	Eukaryota;Archaeplastida;Chlorophyta;Mamiellophyceae;Mamiellales;Bathycoccaceae;Ostreococcus;Ostreococcus mediterraneus clade-D-RCC1621								0	2	278
contig_126714_95_400_-	489	306													CAMPEP_0206076102-CAMNT_0053455071	43.1			Unidentified, Strain CCMP1205	44458	Eukaryota	Archaeplastida	93930	359	0.6433	8	7	Eukaryota;Archaeplastida;Chlorophyta;Prasinophyceae;Prasinophyceae_X;Prasinophyceae_XX;Prasinophyceae_XXX;Prasinophyceae RCC701								0	26	820
contig_126721_1_558_+	558	558	tet:TTHERM_00368570	hypothetical protein											gi13478;-TTA	25.56	hypothetical protein	CAM_CRCL_6253129	Tetrahymena thermophila	5911	Eukaryota	Archaeplastida	93930	359	0.502	7	7	Eukaryota;Archaeplastida;Chlorophyta;Chlorophyceae;Chlorophyceae_X;CW-Chlamydomonadales;Polytomella;Polytomella parva								0	1	205
contig_127606_1_327_-	368	327	vcn:VOLCADRAFT_79791	hypothetical protein; K03165 DNA topoisomerase III [EC:5.99.1.2]							KOG0118	FOG: RRM domain	General function prediction only	POORLY CHARACTERIZED	jgi_79791_7100.m000245-Volca1	75	DNA topoisomerase	CAM_CRCL_31969355	Volvox carteri	3067	Eukaryota	Archaeplastida	93930	359	0.6399	6	5	Eukaryota;Archaeplastida;Streptophyta;Embryophyceae;Embryophyceae_X;Embryophyceae_XX;Brachypodium;Brachypodium distachyon	PF00098	Zinc knuckle						0	0	68
contig_127621_1_367_+	367	367													CAMPEP_0175045800-CAMNT_0016309427	40.35			Polytomella parva	51329	Eukaryota	Archaeplastida	93930	359	0.523	2	2	Eukaryota;Archaeplastida;Chlorophyta;Chlorophyceae;Chlorophyceae_X;CW-Chlamydomonadales;Polytomella;Polytomella parva								0	0	67
contig_127791_1_468_-	468	468									KOG1003	Actin filament-coating protein tropomyosin	Cytoskeleton	CELLULAR PROCESSES AND SIGNALING	CAMPEP_0203019776-CAMNT_0049761535	28.66			Micromonas pusilla CCAC1681	-311174	Eukaryota	Archaeplastida	93930	359	0.6725	4	4	Eukaryota;Archaeplastida;Chlorophyta;Mamiellophyceae;Mamiellales;Mamiellaceae;Micromonas;Micromonas pusilla CCAC1681								0	4	132
contig_127916_691_837_-	1412	147									KOG0063	RNAse L inhibitor, ABC superfamily	RNA processing and modification	INFORMATION STORAGE AND PROCESSING	100213121-hmg1818	97.37	abce1; ATP-binding cassette, sub-family E (OABP), member 1		Hydra magnipapillata	6085	Eukaryota	Archaeplastida	93930	359	0.5551	35	31	Eukaryota;Archaeplastida;Chlorophyta;Chlorodendrophyceae;Chlorodendrales;Chlorodendrales_X;Tetraselmis;Tetraselmis astigmatica, Strain CCMP880	PF00005	ABC transporter						0	6	73
contig_128143_1_409_+	430	409													Al_scaffold_0008_459-8Araly1	29.17		CAM_CRCL_21659	Arabidopsis lyrata	59689	Eukaryota	Archaeplastida	93930	359	0.684	2	2	Eukaryota;Archaeplastida;Streptophyta;Brassicales;Brassicaceae;Camelineae;Arabidopsis;Arabidopsis lyrata								0	0	68
contig_128190_1_587_+	593	587	ago:AGOS_ABR138C	ABR138Cp; K14763 H/ACA ribonucleoprotein complex non-core subunit NAF1		K14763	H/ACA ribonucleoprotein complex non-core subunit NAF1			Q75D86					CAMPEP_0200067712-CAMNT_0045999935	31.96			Durinskia baltica, Strain CSIRO CS-38	400756	Eukaryota	Archaeplastida	93930	359	0.684	6	4	Eukaryota;Archaeplastida;Chlorophyta;Chlorodendrophyceae;Chlorodendrales;Chlorodendrales_X;Tetraselmis;Tetraselmis chuii, Strain PLY429								0	40	184
contig_128203_1_352_-	352	352	ppp:PHYPADRAFT_215149	hypothetical protein						A9SS48					CAMPEP_0186625418-CAMNT_0029474323	52.99			Aurantiochytrium limacinum ATCCMYA1381	87120	Eukaryota	Archaeplastida	93930	359	0.684	2	2	Eukaryota;Archaeplastida;Streptophyta;Embryophyceae;Embryophyceae_X;Embryophyceae_XX;Physcomitrella;Physcomitrella patens	PF00171	Aldehyde dehydrogenase family						0	0	52
contig_128210_72_1861_+	1862	1790									KOG1307	K+-dependent Ca2+/Na+ exchanger NCKX1 and related proteins	Inorganic ion transport and metabolism	METABOLISM	52311-Bigna1_scaffold_7	43.46			Bigelowiella natans, Strain CCMP1242	227086	Eukaryota	Archaeplastida	93930	359	0.684	2	2	Eukaryota;Archaeplastida;Chlorophyta;Pyramimonadales;Pyramimonadales_X;Pyramimonadales_XX;Pterosperma;Pterosperma, Strain CCMP1384	_GAP_||PF01699	_GAP_||Sodium/calcium exchanger protein	_GAP_||TIGR00367	_GAP_||K+-dependent Na+/Ca+ exchanger homolog	CaCA		2	11	0	775
contig_128527_115_563_-	563	449													659193-tca1398	37.88	Br-c, br-NZ2, br-Z2; broad-complex		Tribolium castaneum	7070	Eukaryota	Archaeplastida	93930	359	0.684	2	2	Eukaryota;Archaeplastida;Rhodophyta;Unclassified_Rhodophyta;Unclassified_Rhodophyta_X;Unclassified_Rhodophyta_XX;Coastal Red Alga;Cyanoptycaceae sp.								0	18	608
contig_128798_1_345_+	345	345													evm.model.contig_4405.6-ppurpureum	44.68	hypothetical protein		Porphyridium purpureum	35688	Eukaryota	Archaeplastida	93930	359	0.644	4	4	Eukaryota;Opisthokonta;Metazoa;Cnidaria;Cnidaria_X;Anthozoa;Nematostella;Nematostella vectensis								0	4	172
contig_128822_1_891_+	891	891	nve:NEMVE_v1g93710	hypothetical protein						A7RU32	KOG1721	FOG: Zn-finger	General function prediction only	POORLY CHARACTERIZED	NEMVEDRAFT_v1g93710-PA-scaffold_33Nemve1	27.74	Predicted protein [Source:UniProtKB/TrEMBL;Acc:A7RU32]	CAM_CRCL_1433	Nematostella vectensis	45351	Eukaryota	Archaeplastida	93930	359	0.6026	4	4	Eukaryota;Opisthokonta;Metazoa;Arthropoda;Hexapoda;Insecta;Pediculus;Pediculus humanus	_GAP_||PF13894	_GAP_||PF13894						0	2	331
contig_128865_1_384_+	384	384	vvm:VVM_00464	endonuclease I											CAMPEP_0206078774-CAMNT_0053458187	55.26			Unidentified, Strain CCMP1205	44458	Eukaryota	Archaeplastida	93930	359	0.542	7	7	Eukaryota;Archaeplastida;Chlorophyta;Prasinophyceae;Prasinophyceae_X;Prasinophyceae_XX;Prasinophyceae_XXX;Unidentified sp, Strain CCMP2175	_GAP_||PF04231	_GAP_||Endonuclease I						0	0	68
contig_129129_69_527_-	527	459	cre:CHLREDRAFT_196833	MME1; NAD malic enzyme (EC:1.1.1.39); K00028 malate dehydrogenase (decarboxylating) [EC:1.1.1.39]	cre01100||cre00620||cre00710	K00028	malate dehydrogenase (decarboxylating) [EC:1.1.1.39]	Pyruvate metabolism || Carbon fixation in photosynthetic organisms || Carbon metabolism	1.1.1.39	A8HWC2	KOG1257	NADP+-dependent malic enzyme	Energy production and conversion	METABOLISM	CAMPEP_0206141050-CAMNT_0053535449	55.07			Stichococcus sp, Strain RCC1054	1461547	Eukaryota	Archaeplastida	93930	359	0.7732	8	8	Eukaryota;Archaeplastida;Chlorophyta;Prasinophyceae;Prasinophyceae_X;Prasinophyceae_XX;Prasinophyceae_XXX;Prasinophyceae RCC1871	PF03949||_GAP_	Malic enzyme, NAD binding domain||_GAP_						0	22	73
contig_129234_19_432_+	498	414									KOG1756	Histone 2A	Chromatin structure and dynamics	INFORMATION STORAGE AND PROCESSING	CAMPEP_0196995042-CAMNT_0042410603	53.78			Euplotes crassus, Strain CT5	5936	Eukaryota	Archaeplastida	93930	359	0.4902	94	57	Eukaryota;Archaeplastida;Chlorophyta;Chlorophyceae;Chlorophyceae_X;CW-Chlamydomonadales;Volvox;Volvox carteri	PF00125||_GAP_	Core histone H2A/H2B/H3/H4||_GAP_						0	25	98
contig_129765_1_640_+	640	640													jgi_109441_35.m000171-MicpuN2	59.12	hypothetical protein	CAM_CRCL_31783354	Micromonas RCC299	296587	Eukaryota	Archaeplastida	93930	359	0.893	11	11	Eukaryota;Archaeplastida;Chlorophyta;Mamiellophyceae;Mamiellales;Mamiellaceae;Micromonas;Micromonas RCC299	_GAP_||PF13450||_GAP_	_GAP_||PF13450||_GAP_						1	0	610
contig_130007_1_373_+	373	373									KOG1256	Long-chain acyl-CoA synthetases (AMP-forming)	Lipid transport and metabolism	METABOLISM	CBG05109-chrICB3	56.45		CAM_CRCL_3398	Caenorhabditis briggsae	6238	Eukaryota	Archaeplastida	93930	359	0.6156	42	34	Eukaryota;Archaeplastida;Chlorophyta;Mamiellophyceae;Mamiellales;Mamiellaceae;Micromonas;Micromonas RCC299	PF00501	AMP-binding enzyme						0	0	59
contig_130036_1_951_+	1027	951	lbz:LbrM35_V2.4060	hypothetical protein						A4HPQ0					CAMPEP_0196572354-CAMNT_0041889653	35.14			Pyramimonas amylifera, Strain CCMP720	-283589	Eukaryota	Archaeplastida	93930	359	1	1	1	Eukaryota;Archaeplastida;Chlorophyta;Pyramimonadales;Pyramimonadales_X;Pyramimonadales_XX;Pyramimonas;Pyramimonas amylifera, Strain CCMP720	_GAP_||PF13920||_GAP_	_GAP_||PF13920||_GAP_						0	0	180
contig_130293_1_451_+	451	451	tko:TK1017	chromosome segregation ATPase; K03529 chromosome segregation protein		K03529	chromosome segregation protein			Q5JJA2					TK1017-NC_006624	28.32	chromosome segregation ATPase; K03529 chromosome segregation protein	CAM_CRCL_32417751	Thermococcus kodakarensis KOD1	69014	Eukaryota	Archaeplastida	93930	359	0.4186	12	11	Eukaryota;Archaeplastida;Chlorophyta;Mamiellophyceae;Mamiellales;Mamiellaceae;Micromonas;Micromonas sp. CCMP1646								0	0	64
contig_131159_784_957_-	2003	174									KOG0643	Translation initiation factor 3, subunit i (eIF-3i)/TGF-beta receptor-interacting protein (TRIP-1)	Translation, ribosomal structure and biogenesis	INFORMATION STORAGE AND PROCESSING	CAMPEP_0199150470-CAMNT_0044871461	59.26			Vaucheria litorea, Strain CCMP2940	109269	Eukaryota	Archaeplastida	93930	359	0.6437	28	21	Eukaryota;Archaeplastida;Streptophyta;Embryophyceae;Embryophyceae_X;Embryophyceae_XX;Oryza;Oryza sativa Indica Group	PF00400	WD domain, G-beta repeat						0	0	55
contig_131509_47_350_-	350	304	afv:AFLA_003100	C2H2 finger domain protein, putative						B8NQ07					ORF75918-Lotgi1	46	hypothetical protein	CAM_CRCL_4176984	Lottia gigantea	225164	Eukaryota	Archaeplastida	93930	359	0.684	2	2	Eukaryota;Archaeplastida;Rhodophyta;Rhodophyceae;Porphyridiales-1;Porphyridiaceae;Erythrolobus;Erythrolobus madagascarensis, Strain CCMP3276								0	3	184
contig_132169_1_610_-	610	610	cag:Cagg_0670	regulator of chromosome condensation RCC1						B8G4X2					CAMPEP_0197865260-CAMNT_0043483699	42.42			Pterosperma, Strain CCMP1384	1461541	Eukaryota	Archaeplastida	93930	359	1	1	1	Eukaryota;Archaeplastida;Chlorophyta;Pyramimonadales;Pyramimonadales_X;Pyramimonadales_XX;Pterosperma;Pterosperma, Strain CCMP1384	PF13540||PF00415||PF13540||_GAP_	PF13540||Regulator of chromosome condensation (RCC1) repeat||PF13540||_GAP_						0	3	105
contig_132311_1_681_-	681	681	rba:RB1593	icd; isocitrate dehydrogenase (EC:1.1.1.42); K00031 isocitrate dehydrogenase [EC:1.1.1.42]	rba00480||rba01110||rba01120||rba00020||rba01100	K00031	isocitrate dehydrogenase [EC:1.1.1.42]	Citrate cycle (TCA cycle) || Glutathione metabolism || Carbon fixation pathways in prokaryotes || Carbon metabolism || 2-Oxocarboxylic acid metabolism || Biosynthesis of amino acids || Peroxisome	1.1.1.42	Q7UX35					CAMPEP_0117675882-CAMNT_0005484937	75.38			Tetraselmis astigmatica, Strain CCMP880	1074897	Eukaryota	Archaeplastida	93930	359	0.774	3	3	Eukaryota;Archaeplastida;Chlorophyta;Chlorodendrophyceae;Chlorodendrales;Chlorodendrales_X;Tetraselmis;Tetraselmis astigmatica, Strain CCMP880	PF03971	Monomeric isocitrate dehydrogenase						0	4	89
contig_132910_1_567_+	567	567									KOG3002	Zn finger protein	General function prediction only	POORLY CHARACTERIZED	ORGLA07G0194900.1-Oglab07_01461	37.62		CAM_CRCL_11159	Oryza glaberrima	4538	Eukaryota	Archaeplastida	93930	359	0.9172	42	10	Eukaryota;Archaeplastida;Streptophyta;Embryophyceae;Embryophyceae_X;Embryophyceae_XX;Zea;Zea mays								0	0	77
contig_132929_107_994_-	1296	888	ppp:PHYPADRAFT_184505	hypothetical protein; K00856 adenosine kinase [EC:2.7.1.20]	ppp00230||ppp01100	K00856	adenosine kinase [EC:2.7.1.20]	Purine metabolism	2.7.1.20	O49923	KOG2854	Possible pfkB family carbohydrate kinase	Carbohydrate transport and metabolism	METABOLISM	ESTEXT_GWP_GW1.C_740114-scaffold_74Phypa1	54.96	subsp. patens predicted protein (PHYPADRAFT_184505) mRNA, complete cds [source:RefSeq_dna_predicted;Acc:XM_001765149.1]	CAM_CRCL_7686	Physcomitrella patens	3218	Eukaryota	Archaeplastida	93930	359	0.5786	3	3	Eukaryota;Archaeplastida;Streptophyta;Embryophyceae;Embryophyceae_X;Embryophyceae_XX;Physcomitrella;Physcomitrella patens	PF00294	pfkB family carbohydrate kinase						0	35	847
contig_132971_1_623_-	672	623	isc:IscW_ISCW022029	DNA polymerase delta processivity factor, putative; K04802 proliferating cell nuclear antigen	isc03030||isc03410||isc03420||isc03430	K04802	proliferating cell nuclear antigen	DNA replication || Base excision repair || Nucleotide excision repair || Mismatch repair || Cell cycle || Hepatitis B || HTLV-I infection		B7QFN6	KOG1636	DNA polymerase delta processivity factor (proliferating cell nuclear antigen)	Replication, recombination and repair	INFORMATION STORAGE AND PROCESSING	ISCW022029-PA-DS926387IscaW1	45.15	DNA polymerase delta processivity factor, putative	CAM_CRCL_9738	Ixodes scapularis	6945	Eukaryota	Archaeplastida	93930	359	0.5624	19	19	Eukaryota;Opisthokonta;Metazoa;Arthropoda;Hexapoda;Insecta;Drosophila;Drosophila grimshawi	PF00705||PF02747	Proliferating cell nuclear antigen, N-terminal domain||Proliferating cell nuclear antigen, C-terminal domain	TIGR00590	proliferating cell nuclear antigen (pcna)				0	0	145
contig_133005_257_907_-	907	651													ENSGALP00000022203-chromosome:WASHUC2:2:94068763:95068762:1	33.85		CAM_CRCL_13326	Gallus gallus	9031	Eukaryota	Archaeplastida	93930	359	0.7488	7	5	Eukaryota;Archaeplastida;Rhodophyta;Rhodophyceae;Porphyridiales-1;Porphyridiaceae;Erythrolobus;Erythrolobus madagascarensis, Strain CCMP3276								0	2	526
contig_133015_1_707_+	707	707													CAMPEP_0119134916-CAMNT_0007125759	28.47			Prasinophyceae sp. RCC2339	-311193	Eukaryota	Archaeplastida	93930	359	1	1	1	Eukaryota;Archaeplastida;Chlorophyta;Prasinophyceae;unclassified Prasinophyceae;unclassified Prasinophyceae_X;unclassified Prasinophyceae_XX;Prasinophyceae sp. RCC2339	_GAP_||PF02225	_GAP_||PA domain						0	2	147
contig_133065_1_1054_+	1192	1054	olu:OSTLU_42602	hypothetical protein; K09494 T-complex protein 1 subunit beta		K09494	T-complex protein 1 subunit beta			A4S1J1	KOG0363	Chaperonin complex component, TCP-1 beta subunit (CCT2)	Posttranslational modification, protein turnover, chaperones	CELLULAR PROCESSES AND SIGNALING	PAC:15405948-scaffold_13	62.84		CAM_CRCL_37347	Selaginella moellendorffii	88036	Eukaryota	Archaeplastida	93930	359	0.6423	37	35	Eukaryota;Archaeplastida;Chlorophyta;Mamiellophyceae;Mamiellales;Bathycoccaceae;Ostreococcus;Ostreococcus RCC809	PF00118	TCP-1/cpn60 chaperonin family						0	5	189
contig_133861_1_552_-	552	552													PPA22629-Ppa_Contig59pp1	34.94		CAM_CRCL_1682	Pristionchus pacificus	54126	Eukaryota	Archaeplastida	93930	359	0.684	2	2	Eukaryota;Archaeplastida;Rhodophyta;Rhodellophyceae;Rhodellales;Rhodellales_X;Rhodella;Rhodella maculata CCMP736								0	3	118
contig_133905_434_1010_-	1011	577	ppp:PHYPADRAFT_124217	hypothetical protein; K14948 olypyrimidine tract-binding protein 2		K14948	polypyrimidine tract-binding protein 2			A9S4W5	KOG1190	Polypyrimidine tract-binding protein	RNA processing and modification	INFORMATION STORAGE AND PROCESSING	E_GW1.48.34.1-scaffold_48Phypa1	48.44	subsp. patens predicted protein (PHYPADRAFT_124217) mRNA, complete cds [source:RefSeq_dna_predicted;Acc:XM_001761304.1]	CAM_CRCL_2487	Physcomitrella patens	3218	Eukaryota	Archaeplastida	93930	359	0.8354	19	13	Eukaryota;Archaeplastida;Streptophyta;Embryophyceae;Embryophyceae_X;Embryophyceae_XX;Zea;Zea mays	_GAP_||PF13893	_GAP_||PF13893						0	8	389
contig_133969_1_633_+	871	633	tps:THAPSDRAFT_20571	hypothetical protein						B8BSQ8					CAMPEP_0197590688-CAMNT_0043155901	51.18			Mamiellaceae RCC2288	1155430	Eukaryota	Archaeplastida	93930	359	0.825	5	5	Eukaryota;Archaeplastida;Chlorophyta;Mamiellophyceae;Mamiellales;Mamiellaceae;Mantoniella;Mantoniella antarctica, Strain SL-175								1	0	176
contig_134017_249_866_-	1275	618	phu:Phum_PHUM562620	zinc finger protein, putative						E0W0S0					ORF166739-Lotgi1	35	novel krab box containing protein	CAM_CRCL_1433	Lottia gigantea	225164	Eukaryota	Archaeplastida	93930	359	0.6808	3	3	Eukaryota;Opisthokonta;Metazoa;Arthropoda;Hexapoda;Insecta;Pediculus;Pediculus humanus								0	10	300
contig_134019_50_457_+	500	408													CAMPEP_0197857056-CAMNT_0043472747	56.92			Pterosperma, Strain CCMP1384	1461541	Eukaryota	Archaeplastida	93930	359	1	1	1	Eukaryota;Archaeplastida;Chlorophyta;Pyramimonadales;Pyramimonadales_X;Pyramimonadales_XX;Pterosperma;Pterosperma, Strain CCMP1384	PF03479	Domain of unknown function (DUF296)						0	0	128
contig_134546_67_646_+	646	580													CAMPEP_0185856946-CAMNT_0028559207	29.35			Erythrolobus madagascarensis, Strain CCMP3276	708628	Eukaryota	Archaeplastida	93930	359	1	1	1	Eukaryota;Archaeplastida;Rhodophyta;Rhodophyceae;Porphyridiales-1;Porphyridiaceae;Erythrolobus;Erythrolobus madagascarensis, Strain CCMP3276								0	7	141
contig_134640_176_448_+	448	273													679994-rno2196	52.87	to histone 1, H2ai		Rattus norvegicus	10116	Eukaryota	Archaeplastida	93930	359	0.6911	9	8	Eukaryota;Archaeplastida;Chlorophyta;Mamiellophyceae;Mamiellales;Mamiellaceae;Micromonas;Micromonas sp. RCC472								0	4	89
contig_134730_165_669_-	669	505													evm.model.contig_3577.4-ppurpureum	30.4	hypothetical protein		Porphyridium purpureum	35688	Eukaryota	Archaeplastida	93930	359	1	1	1	Eukaryota;Archaeplastida;Rhodophyta;Porphyridiophyceae;Porphyridiales;Porphyridiales_X;Porphyridium;Porphyridium purpureum	_GAP_||PF13894	_GAP_||PF13894						0	13	456
contig_135031_1_469_+	469	469	tps:THAPSDRAFT_bd1810	hypothetical protein						B8LE89					CAMPEP_0182619260-CAMNT_0024839493	48.05			Picochlorum RCC944	464278	Eukaryota	Archaeplastida	93930	359	0.6808	3	3	Eukaryota;Archaeplastida;Chlorophyta;Prasinophyceae;unclassified Prasinophyceae;unclassified Prasinophyceae_X;unclassified Prasinophyceae_XX;Prasinophyceae sp. RCC998								0	6	231
contig_135084_1_594_+	594	594													jgi_20533_10.m000643-MicpuC2	34.52	hypothetical protein	CAM_CRCL_31810551	Micromonas pusilla CCMP1545	564608	Eukaryota	Archaeplastida	93930	359	0.684	2	2	Eukaryota;Archaeplastida;Chlorophyta;Mamiellophyceae;Mamiellales;Mamiellaceae;Micromonas;Micromonas pusilla CCMP1545								0	5	264
contig_135133_133_936_-	936	804	tbr:Tb10.6k15.1350	pteridine transporter						Q38A66					CAMPEP_0198635208-CAMNT_0044369777	31.65			Phaeocystis cordata	118079	Eukaryota	Archaeplastida	93930	359	0.6558	7	7	Eukaryota;Archaeplastida;Chlorophyta;Prasinophyceae;Prasinophyceae_X;Prasinophyceae_XX;Prasinophyceae_XXX;Prasinophyceae RCC701	PF03092||_GAP_	BT1 family||_GAP_			FBT		2	2	2	513
contig_135184_1_604_+	604	604													CAMPEP_0117027142-CAMNT_0004734315	50.85			Tiarina fusa	693140	Eukaryota	Archaeplastida	93930	359	0.6116	5	5	Eukaryota;Archaeplastida;Chlorophyta;Prasinophyceae;Prasinophyceae_X;Prasinophyceae_XX;Prasinophyceae_XXX;Unidentified sp, Strain CCMP2175	PF01033||PF04231	Somatomedin B domain||Endonuclease I						0	0	233
contig_135403_1_552_-	552	552													CAMPEP_0197479206-CAMNT_0043020815	31.64			Prasinophyceae sp. RCC998	464263	Eukaryota	Archaeplastida	93930	359	1	1	1	Eukaryota;Archaeplastida;Chlorophyta;Prasinophyceae;unclassified Prasinophyceae;unclassified Prasinophyceae_X;unclassified Prasinophyceae_XX;Prasinophyceae sp. RCC998	PF03092	BT1 family			FBT		3	3	0	75
contig_135728_113_509_+	509	397	isc:IscW_ISCW000551	hypothetical protein						B7P617					CAMPEP_0206023326-CAMNT_0053397307	34.58			Exanthemachrysis gayraliae, Strain RCC1523	119497	Eukaryota	Archaeplastida	93930	359	0.7785	6	5	Eukaryota;Archaeplastida;Streptophyta;Brassicales;Brassicaceae;Camelineae;Arabidopsis;Arabidopsis thaliana	PF07500	Transcription factor S-II (TFIIS), central domain						0	0	54
contig_136029_1_546_-	546	546													CAMPEP_0196644444-CAMNT_0041973995	46.03			Pycnococcus sp, Strain CCM1998	-283591	Eukaryota	Archaeplastida	93930	359	1	1	1	Eukaryota;Archaeplastida;Chlorophyta;Prasino-Clade-V;Prasino-Clade-V_X;Pycnococcaceae;Pycnococcus;Pycnococcus sp, Strain CCM1998								0	1	108
contig_136179_1_543_+	543	543													CAMPEP_0200905466-CAMNT_0047092719	25.13			Tetraselmis striata, Strain LANL1001	3165	Eukaryota	Archaeplastida	93930	359	1	1	1	Eukaryota;Archaeplastida;Chlorophyta;Chlorodendrophyceae;Chlorodendrales;Chlorodendrales_X;Tetraselmis;Tetraselmis striata, Strain LANL1001								0	0	111
contig_136243_1_557_+	557	557	dan:Dana_GF18481	GF18481 gene product from transcript GF18481-RA						B3M2G9	KOG1721	FOG: Zn-finger	General function prediction only	POORLY CHARACTERIZED	AAEL011047-PA-supercont1537	24.46	zinc finger protein	CAM_CRCL_1433	Phytophthora infestans	4787	Eukaryota	Archaeplastida	93930	359	0.6388	7	3	Eukaryota;Stramenopiles;Stramenopiles_X;Oomyceta;Oomyceta_X;Oomyceta_XX;Phytophthora;Phytophthora infestans	_GAP_||PF13894||_GAP_	_GAP_||PF13894||_GAP_						0	4	263
contig_136281_1_610_+	737	610	vcn:VOLCADRAFT_103990	hypothetical protein											CAMPEP_0191511610-CAMNT_0035511219	29.58			Rhodella maculata CCMP736	38298	Eukaryota	Archaeplastida	93930	359	0.776	2	2	Eukaryota;Archaeplastida;Chlorophyta;Chlorophyceae;Chlorophyceae_X;CW-Chlamydomonadales;Volvox;Volvox carteri								0	0	126
contig_136429_240_689_+	689	450	sus:Acid_5598	NmrA family protein						Q01UX0					CAMPEP_0118938252-CAMNT_0006882135	51.37			Pyramimonas obovata CCMP722	-311159	Eukaryota	Archaeplastida	93930	359	0.977	2	2	Eukaryota;Archaeplastida;Chlorophyta;Pyramimonadales;Pyramimonadales_X;Pyramimonadales_XX;Pyramimonas;Pyramimonas obovata CCMP722	PF13460	PF13460						0	0	120
contig_136933_1_473_+	473	473									KOG4569	Predicted lipase	Lipid transport and metabolism	METABOLISM	ORGLA05G0129800.1-Oglab05_01171	36.47		CAM_CRCL_27264	Oryza glaberrima	4538	Eukaryota	Archaeplastida	93930	359	0.8694	15	9	Eukaryota;Archaeplastida;Streptophyta;Embryophyceae;Embryophyceae_X;Embryophyceae_XX;Oryza;Oryza sativa Indica Group	PF01764	Lipase (class 3)						0	3	152
contig_137030_1_433_+	433	433	ppp:PHYPADRAFT_96790	hypothetical protein						A9TT49					FGENESH1_PG.SCAFFOLD_311000037-scaffold_311Phypa1	28.44	subsp. patens predicted protein (PHYPADRAFT_96790) mRNA, complete cds [source:RefSeq_dna_predicted;Acc:XM_001781737.1]	CAM_CRCL_4120005	Physcomitrella patens	3218	Eukaryota	Archaeplastida	93930	359	1	1	1	Eukaryota;Archaeplastida;Streptophyta;Embryophyceae;Embryophyceae_X;Embryophyceae_XX;Physcomitrella;Physcomitrella patens								0	6	137
contig_137263_1_383_-	383	383									KOG3002	Zn finger protein	General function prediction only	POORLY CHARACTERIZED	CAMPEP_0191878270-CAMNT_0035951477	35.92			Scrippsiella hangoei SHTV5	268821	Eukaryota	Archaeplastida	93930	359	0.672	9	7	Eukaryota;Archaeplastida;Streptophyta;Embryophyceae;Embryophyceae_X;Embryophyceae_XX;Vitis;Vitis vinifera								0	0	292
contig_137508_1_357_+	357	357	cre:CHLREDRAFT_187377	hypothetical protein						A8I5D8					EDP07171-DS496113v3	44.12	hypothetical protein	CAM_CRCL_4000078	Chlamydomonas reinhardtii	3055	Eukaryota	Archaeplastida	93930	359	1	1	1	Eukaryota;Archaeplastida;Chlorophyta;Chlorophyceae;Chlorophyceae_X;CW-Chlamydomonadales;Chlamydomonas;Chlamydomonas reinhardtii								0	23	1814
contig_137776_1_875_+	875	875	dan:Dana_GF20428	GF20428 gene product from transcript GF20428-RA						B3MQE3	KOG1721	FOG: Zn-finger	General function prediction only	POORLY CHARACTERIZED	CAMPEP_0184485582-CAMNT_0026867089	39.44			Norrisiella sphaerica, Strain BC52	91329	Eukaryota	Archaeplastida	93930	359	0.5786	3	3	Eukaryota;Archaeplastida;Rhodophyta;Rhodophyceae;Porphyridiales-1;Porphyridiaceae;Erythrolobus;Erythrolobus australicus, Strain CCMP3124								0	16	787
contig_137866_161_349_+	349	189													CAMPEP_0206094648-CAMNT_0053476925	56.1			Unidentified sp, Strain CCMP2175	1461546	Eukaryota	Archaeplastida	93930	359	0.774	3	3	Eukaryota;Archaeplastida;Chlorophyta;Prasinophyceae;Prasinophyceae_X;Prasinophyceae_XX;Prasinophyceae_XXX;Unidentified sp, Strain CCMP2175								0	14	197
contig_137872_1_342_+	342	342													CAMPEP_0177584132-CAMNT_0019073635	38.67			Tetraselmis GSL018	582737	Eukaryota	Archaeplastida	93930	359	0.7893	3	2	Eukaryota;Archaeplastida;Chlorophyta;Chlorodendrophyceae;Chlorodendrales;Chlorodendrales_X;Tetraselmis;Tetraselmis GSL018								0	3	1780
contig_137967_1_323_-	323	323													CAMPEP_0182618784-CAMNT_0024839015	41.56			Picochlorum RCC944	464278	Eukaryota	Archaeplastida	93930	359	1	1	1	Eukaryota;Archaeplastida;Chlorophyta;Trebouxiophyceae;Chlorellales;Chlorellales_X;Picochlorum;Picochlorum RCC944								0	2	993
contig_138360_40_368_-	368	329	tet:TTHERM_00463030	Zinc finger, C2H2 type family protein							KOG1721	FOG: Zn-finger	General function prediction only	POORLY CHARACTERIZED	CAMPEP_0113958454-CAMNT_0000969331	39.29			Rhodosorus marinus CCMP769	-311207	Eukaryota	Archaeplastida	93930	359	1	1	1	Eukaryota;Archaeplastida;Rhodophyta;Stylonematophyceae;Porphyridiales-2;Stylonematales-Group-II;Rhodosorus;Rhodosorus marinus CCMP769	PF12756||PF13894	PF12756||PF13894						0	2	67
contig_138389_66_402_-	402	337													gnl_CMP283C_7090.m000040-CMER	38.1	Zinc finger, C2H2 type	CAM_CRCL_14748740	Cyanidioschyzon merolae	45157	Eukaryota	Archaeplastida	93930	359	0.8373	2	2	Eukaryota;Archaeplastida;Rhodophyta;Bangiophyceae;Cyanidiales;Cyanidiales_X;Cyanidioschyzon;Cyanidioschyzon merolae	_GAP_||PF13894	_GAP_||PF13894						0	0	100
contig_138556_157_528_-	688	372													evm.model.contig_3440.1-ppurpureum	31.76	hypothetical protein		Porphyridium purpureum	35688	Eukaryota	Archaeplastida	93930	359	1	1	1	Eukaryota;Archaeplastida;Rhodophyta;Porphyridiophyceae;Porphyridiales;Porphyridiales_X;Porphyridium;Porphyridium purpureum								0	7	431
contig_138712_43_359_+	359	317									KOG0107	Alternative splicing factor SRp20/9G8 (RRM superfamily)	RNA processing and modification	INFORMATION STORAGE AND PROCESSING	CAMPEP_0198203422-CAMNT_0043874815	38.71			Pyramimonas, Strain CCMP2087	36898	Eukaryota	Archaeplastida	93930	359	0.5786	3	3	Eukaryota;Archaeplastida;Chlorophyta;Pyramimonadales;Pyramimonadales_X;Pyramimonadales_XX;Pyramimonas;Pyramimonas, Strain CCMP2087	PF00076	RNA recognition motif. (a.k.a. RRM, RBD, or RNP domain)						0	6	91
contig_138812_1_636_-	636	636	lif:LinJ10.0660	pteridine transporter ft5						A4HUE4					CAMPEP_0117664208-CAMNT_0005471395	31.43			Tetraselmis astigmatica, Strain CCMP880	1074897	Eukaryota	Archaeplastida	93930	359	0.7491	4	4	Eukaryota;Archaeplastida;Chlorophyta;Mamiellophyceae;Mamiellales;Mamiellaceae;Micromonas;Micromonas sp. CS-222	_GAP_||PF03092||_GAP_	_GAP_||BT1 family||_GAP_			FBT		3	4	8	679
contig_138959_1_168_+	378	168									KOG0002	60s ribosomal protein L39	Translation, ribosomal structure and biogenesis	INFORMATION STORAGE AND PROCESSING	GSVIVT01001053001-11IGGP_12x	70.37	Whole genome shotgun sequence of line PN40024, scaffold_149.assembly12x [Source:UniProtKB/TrEMBL;Acc:D7T535]	CAM_CRCL_7477	Vitis vinifera	29760	Eukaryota	Archaeplastida	93930	359	0.643	25	18	Eukaryota;Archaeplastida;Streptophyta;Embryophyceae;Embryophyceae_X;Embryophyceae_XX;Vitis;Vitis vinifera	PF00832	Ribosomal L39 protein						0	16	975
contig_138972_86_420_-	420	335													CAMPEP_0186646370-CAMNT_0029504415	33.33			Aurantiochytrium limacinum ATCCMYA1381	87120	Eukaryota	Archaeplastida	93930	359	0.4636	3	3	Eukaryota;Archaeplastida;Chlorophyta;Mamiellophyceae;Mamiellales;Mamiellaceae;Micromonas;Micromonas sp. NEPCC29								0	3	167
contig_139027_23_355_+	355	333									KOG1987	Speckle-type POZ protein SPOP and related proteins with TRAF, MATH and BTB/POZ domains	Cell cycle control, cell division, chromosome partitioning	CELLULAR PROCESSES AND SIGNALING	BGIOSGA032960-PA-10Jan_2005	37.04	Putative uncharacterized protein [Source:UniProtKB/TrEMBL;Acc:A2Z7H7]	CAM_CRCL_4000570	Oryza sativa Indica Group	39946	Eukaryota	Archaeplastida	93930	359	0.7927	4	4	Eukaryota;Archaeplastida;Streptophyta;Embryophyceae;Embryophyceae_X;Embryophyceae_XX;Oryza;Oryza sativa Indica Group	PF00651	BTB/POZ domain						0	6	69
contig_13906_1_457_+	457	457													CAMPEP_0200392534-CAMNT_0046462939	33.77			Eutreptiella gymnastica-like, Strain CCMP1594	73025	Eukaryota	Archaeplastida	93930	359	0.8085	5	5	Eukaryota;Archaeplastida;Chlorophyta;Prasinophyceae;Prasinophyceae_X;Prasinophyceae_XX;Prasinophyceae_XXX;Prasinophyceae RCC701	PF03092	BT1 family			FBT		3	4	91	7
contig_139284_1_431_-	431	431													CAMPEP_0200908252-CAMNT_0047096117	27.56			Tetraselmis striata, Strain LANL1001	3165	Eukaryota	Archaeplastida	93930	359	1	1	1	Eukaryota;Archaeplastida;Chlorophyta;Chlorodendrophyceae;Chlorodendrales;Chlorodendrales_X;Tetraselmis;Tetraselmis striata, Strain LANL1001								0	2	117
contig_139338_22_993_-	1531	972													CAMPEP_0198704262-CAMNT_0044463067	50.96			Mantoniella sp, Strain CCMP1436	1461545	Eukaryota	Archaeplastida	93930	359	0.9529	6	6	Eukaryota;Archaeplastida;Chlorophyta;Mamiellophyceae;Mamiellales;Mamiellaceae;Micromonas;Micromonas pusilla CCMP1723								0	49	1074
contig_139345_1_735_-	735	735	tet:TTHERM_00836580 || tet:TTHERM_00348510	Tubulin/FtsZ family, GTPase domain containing protein; K07375 tubulin beta || Tubulin beta chain, putative; K07375 tubulin beta							KOG1375	Beta tubulin	Cytoskeleton	CELLULAR PROCESSES AND SIGNALING	CAMPEP_0202966178-CAMNT_0049689719	96.72			Pseudokeronopsis, Strain Brazil	943345	Eukaryota	Archaeplastida	93930	359	0.5764	112	58	Eukaryota;Archaeplastida;Streptophyta;Embryophyceae;Embryophyceae_X;Embryophyceae_XX;Selaginella;Selaginella moellendorffii	PF00091||_GAP_||PF03953	Tubulin/FtsZ family, GTPase domain||_GAP_||Tubulin C-terminal domain						0	15	526
contig_139655_1_331_-	331	331													CAMPEP_0190220852-CAMNT_0033935633	47.22			Micromonas sp. RCC472	-311215	Eukaryota	Archaeplastida	93930	359	1	1	1	Eukaryota;Archaeplastida;Chlorophyta;Mamiellophyceae;Mamiellales;Mamiellaceae;Micromonas;Micromonas sp. RCC472								0	0	72
contig_139778_1_406_+	407	406	cre:CHLREDRAFT_184173	MPK4; map kinase phosphatase 4						A8IZX5	KOG1716	Dual specificity phosphatase	Defense mechanisms	CELLULAR PROCESSES AND SIGNALING	CAMPEP_0173381766-CAMNT_0014335763	46.51			Hemiselmis viresens, Strain PCC157	77927	Eukaryota	Archaeplastida	93930	359	0.7901	5	5	Eukaryota;Archaeplastida;Chlorophyta;Prasino-Clade-V;Prasino-Clade-V_X;Pycnococcaceae;Pycnococcus;Pycnococcus provasolii RCC2336	PF00782	Dual specificity phosphatase, catalytic domain						0	1	126
contig_139812_238_487_-	487	250									KOG0676	Actin and related proteins	Cytoskeleton	CELLULAR PROCESSES AND SIGNALING	ENSMLUP00000003018-GL431717Myoluc2	48.61	actin, beta-like 2	CAM_CRCL_9994	Myotis lucifugus	59463	Eukaryota	Archaeplastida	93930	359	0.5434	65	44	Eukaryota;Archaeplastida;Streptophyta;Embryophyceae;Embryophyceae_X;Embryophyceae_XX;Physcomitrella;Physcomitrella patens	PF00022	Actin						0	16	70
contig_139926_1_437_+	478	437													CAMPEP_0183819864-CAMNT_0026064755	43.1			Crustomastix stigmata, Strain CCMP3273	195967	Eukaryota	Archaeplastida	93930	359	1	1	1	Eukaryota;Archaeplastida;Chlorophyta;Mamiellophyceae;Dolichomastigales;Crustomastigaceae;Crustomastix;Crustomastix stigmata, Strain CCMP3273								0	6	303
contig_139974_90_317_-	317	228													CAMPEP_0190219926-CAMNT_0033934699	53.23			Micromonas sp. RCC472	-311215	Eukaryota	Archaeplastida	93930	359	0.9655	4	4	Eukaryota;Archaeplastida;Chlorophyta;Mamiellophyceae;Mamiellales;Mamiellaceae;Micromonas;Micromonas pusilla CCMP1723								0	0	193
contig_140088_1_581_-	581	581													ORF72781-Helro1	34.44	hypothetical protein	CAM_CRCL_6146	Helobdella robusta	6412	Eukaryota	Archaeplastida	93930	359	0.4636	3	3	Eukaryota;Archaeplastida;Streptophyta;Embryophyceae;Embryophyceae_X;Embryophyceae_XX;Brachypodium;Brachypodium distachyon	PF14259||_GAP_	PF14259||_GAP_						0	19	69
contig_140193_1_378_-	378	378	tbr:Tb10.6k15.1350	pteridine transporter						Q38A66					EAN78304-10ENA1	37.8	pteridine transporter, putative	CAM_CRCL_4015238	Trypanosoma brucei	5691	Eukaryota	Archaeplastida	93930	359	0.684	2	2	Eukaryota;Archaeplastida;Chlorophyta;Mamiellophyceae;Mamiellales;Mamiellaceae;Mantoniella;Mantoniella antarctica, Strain SL-175	_GAP_||PF03092	_GAP_||BT1 family			FBT		2	0	12	181
contig_140226_54_464_-	464	411	mcp:MCAP_0293	hypothetical protein						Q2SSI4					jgi_99842_25.m000657-MicpuN2	55.37	hypothetical protein	CAM_CRCL_32442888	Micromonas RCC299	296587	Eukaryota	Archaeplastida	93930	359	0.6713	9	7	Eukaryota;Archaeplastida;Chlorophyta;Mamiellophyceae;Mamiellales;Mamiellaceae;Micromonas;Micromonas RCC299	PF03382	Mycoplasma protein of unknown function, DUF285	_GAP_||TIGR02167||_GAP_	_GAP_||bacterial surface protein 26-residue repeat||_GAP_				0	31	409
contig_140518_1_382_-	382	382													CAMPEP_0170604890-CAMNT_0010929855	37.33			Togula jolla, Strain CCCM 725	285029	Eukaryota	Archaeplastida	93930	359	0.7286	9	6	Eukaryota;Archaeplastida;Streptophyta;Embryophyceae;Embryophyceae_X;Embryophyceae_XX;Zea;Zea mays								0	2	135
contig_140691_1_473_+	473	473													CAMPEP_0182445938-CAMNT_0024641777	36			Timspurckia oligopyrenoides	708627	Eukaryota	Archaeplastida	93930	359	0.684	2	2	Eukaryota;Archaeplastida;Rhodophyta;Rhodophyceae;Porphyridiales-1;Porphyridiales_1X;Timspurckia;Timspurckia oligopyrenoides								0	1	96
contig_140694_1_444_+	444	444													CAMPEP_0191523162-CAMNT_0035527037	50			Rhodella maculata CCMP736	38298	Eukaryota	Archaeplastida	93930	359	1	1	1	Eukaryota;Archaeplastida;Rhodophyta;Rhodellophyceae;Rhodellales;Rhodellales_X;Rhodella;Rhodella maculata CCMP736								0	6	363
contig_140832_1_419_-	419	419													CAMPEP_0196283970-CAMNT_0041585629	33.33			Prasinococcus capsulatus, Strain CCMP1194	156131	Eukaryota	Archaeplastida	93930	359	1	1	1	Eukaryota;Archaeplastida;Chlorophyta;Prasinococcales;Prasinococcales_X;Prasinococcales-Clade-A;Prasinococcus;Prasinococcus capsulatus, Strain CCMP1194								0	0	103
contig_140903_87_483_-	483	397													AT5G20470.1-5TAIR10	26.89	myosin, putative.[Source:TAIR;Acc:AT5G20470]	CAM_CRCL_4036656	Arabidopsis thaliana	3702	Eukaryota	Archaeplastida	93930	359	1	1	1	Eukaryota;Archaeplastida;Streptophyta;Brassicales;Brassicaceae;Camelineae;Arabidopsis;Arabidopsis thaliana								0	0	88
contig_141662_1_302_-	302	302									KOG0107	Alternative splicing factor SRp20/9G8 (RRM superfamily)	RNA processing and modification	INFORMATION STORAGE AND PROCESSING	CAMPEP_0199158014-CAMNT_0044882017	43.59			Vaucheria litorea, Strain CCMP2940	109269	Eukaryota	Archaeplastida	93930	359	0.684	2	2	Eukaryota;Archaeplastida;Chlorophyta;Pyramimonadales;Pyramimonadales_X;Pyramimonadales_XX;Pyramimonas;Pyramimonas, Strain CCMP2087	_GAP_||PF00076	_GAP_||RNA recognition motif. (a.k.a. RRM, RBD, or RNP domain)						0	9	427
contig_141863_1_332_-	332	332													CAMPEP_0119181480-CAMNT_0007175801	38.1			Prasinoderma singularis, Strain RCC927	676789	Eukaryota	Archaeplastida	93930	359	1	1	1	Eukaryota;Archaeplastida;Chlorophyta;Prasinococcales;Prasinococcales_X;Prasinococcales-Clade-B;Prasinoderma;Prasinoderma singularis, Strain RCC927	_GAP_||PF04193	_GAP_||PQ loop repeat						0	6	169
contig_142193_19_337_-	337	319	nve:NEMVE_v1g105290	hypothetical protein						A7S5G4					CAMPEP_0198311812-CAMNT_0044014725	39.74			Madagascaria erythrocladioides	753684	Eukaryota	Archaeplastida	93930	359	0.684	2	2	Eukaryota;Archaeplastida;Rhodophyta;Compsopogonophyceae;Erythropeltidales;Erythrotrichiaceae;Madagascaria;Madagascaria erythrocladioides	PF13894||PF13465||PF13894||PF13465||_GAP_	PF13894||PF13465||PF13894||PF13465||_GAP_						0	1	90
contig_142279_1_420_-	420	420	tps:THAPSDRAFT_29304	TUB1; tubulin alpha; K07374 tubulin alpha	tps04145	K07374	tubulin alpha	Phagosome || Gap junction || Pathogenic Escherichia coli infection		B8C832	KOG1376	Alpha tubulin	Cytoskeleton	CELLULAR PROCESSES AND SIGNALING	CAMPEP_0187274950-CAMNT_0030300347	94.96			Dinobryon sp UTEXLB2267	-289847	Eukaryota	Archaeplastida	93930	359	0.5116	128	76	Eukaryota;Archaeplastida;Streptophyta;Embryophyceae;Embryophyceae_X;Embryophyceae_XX;Physcomitrella;Physcomitrella patens	PF03953||_GAP_	Tubulin C-terminal domain||_GAP_						0	2	83
contig_142725_1_513_-	513	513	pae:PA0147 || pag:PLES_01481	oxidoreductase; K06892 || putative oxidoreductase; K06892		K06892				Q9I6Y5					evm.model.contig_2022.1-ppurpureum	51.81	hypothetical protein		Porphyridium purpureum	35688	Eukaryota	Archaeplastida	93930	359	1	1	1	Eukaryota;Archaeplastida;Rhodophyta;Porphyridiophyceae;Porphyridiales;Porphyridiales_X;Porphyridium;Porphyridium purpureum	_GAP_||PF03171	_GAP_||2OG-Fe(II) oxygenase superfamily						0	2	86
contig_143133_1_396_+	396	396	hhe:HH0050	hypothetical protein						Q7VK42					CAMPEP_0179702406-CAMNT_0021575541	55.04			Ostreococcus mediterraneus clade-D-RCC2593	-311164	Eukaryota	Archaeplastida	93930	359	0.523	2	2	Eukaryota;Archaeplastida;Chlorophyta;Mamiellophyceae;Mamiellales;Bathycoccaceae;Ostreococcus;Ostreococcus mediterraneus clade-D-RCC2593	PF03382	Mycoplasma protein of unknown function, DUF285	TIGR02167	bacterial surface protein 26-residue repeat				0	0	148
contig_143163_1_726_-	726	726													estExt_Genemark1.C_70364-C169_V2_scaffold_7	25.61			Coccomyxa subellipsoidea	248742	Eukaryota	Archaeplastida	93930	359	0.5786	3	3	Eukaryota;Archaeplastida;Chlorophyta;Trebouxiophyceae;Trebouxiophyceae_X;Trebouxiophyceae_XX;Coccomyxa;Coccomyxa subellipsoidea	_GAP_||PF12874||_GAP_	_GAP_||PF12874||_GAP_						0	7	140
contig_143213_80_481_-	575	402													CAMPEP_0198311922-CAMNT_0044014841	31.87			Madagascaria erythrocladioides	753684	Eukaryota	Archaeplastida	93930	359	0.6729	5	5	Eukaryota;Archaeplastida;Rhodophyta;Stylonematophyceae;Porphyridiales-2;Stylonematales-Group-II;Rhodosorus;Rhodosorus marinus CCMP769								0	2	142
contig_143478_1_416_-	416	416									KOG1721	FOG: Zn-finger	General function prediction only	POORLY CHARACTERIZED	CAMPEP_0184748714-CAMNT_0027224493	24.11			Rhodosorus marinus UTEX LB2760	-311208	Eukaryota	Archaeplastida	93930	359	0.9071	4	3	Eukaryota;Archaeplastida;Rhodophyta;Stylonematophyceae;Porphyridiales-2;Stylonematales-Group-II;Rhodosorus;Rhodosorus marinus CCMP769	_GAP_||PF13894	_GAP_||PF13894						0	8	86
contig_143934_1_296_+	303	296									KOG2112	Lysophospholipase	Lipid transport and metabolism	METABOLISM	Tsp_10021-tsp1467	40.23	acyl-protein thioesterase 1		Trichinella spiralis	6334	Eukaryota	Archaeplastida	93930	359	0.73	4	3	Eukaryota;Archaeplastida;Chlorophyta;Chlorodendrophyceae;Chlorodendrales;Chlorodendrales_X;Tetraselmis;Tetraselmis GSL018	PF02230	Phospholipase/Carboxylesterase						0	12	61
contig_144157_1_436_-	436	436													CAMPEP_0184686004-CAMNT_0027140661	49.33			Compsopogon caeruleus	31354	Eukaryota	Archaeplastida	93930	359	0.783	3	3	Eukaryota;Archaeplastida;Rhodophyta;Compsopogonophyceae;Compsopogonales;Compsopogonales_X;Compsopogon;Compsopogon caeruleus	PF13465||PF00096||_GAP_	PF13465||Zinc finger, C2H2 type||_GAP_						0	4	55
contig_144165_1_464_+	464	464													CAMPEP_0183819738-CAMNT_0026064627	33.86			Crustomastix stigmata, Strain CCMP3273	195967	Eukaryota	Archaeplastida	93930	359	0.523	2	2	Eukaryota;Archaeplastida;Chlorophyta;Mamiellophyceae;Dolichomastigales;Crustomastigaceae;Crustomastix;Crustomastix stigmata, Strain CCMP3273								0	2	60
contig_144205_1_303_-	303	303													CAMPEP_0184701784-CAMNT_0027162009	29.79			Porphyridium aerugineum	2792	Eukaryota	Archaeplastida	93930	359	0.684	2	2	Eukaryota;Archaeplastida;Rhodophyta;Porphyridiophyceae;Porphyridiales;Porphyridiales_X;Porphyridium;Porphyridium aerugineum								0	1	101
contig_144260_30_396_-	396	367													ACYPI008194-PA-EQ124779Acyr2	29	similar to zinc finger protein 91 [Source:RefSeq peptide predicted;Acc:XP_001942720]	CAM_CRCL_4061817	Acyrthosiphon pisum	7029	Eukaryota	Archaeplastida	93930	359	0.684	4	3	Eukaryota;Opisthokonta;Metazoa;Arthropoda;Hexapoda;Insecta;Acyrthosiphon;Acyrthosiphon pisum								0	1	75
contig_144419_1_458_+	458	458	vcn:VOLCADRAFT_82548	sdc1; serine decarboxylase; K01590 histidine decarboxylase [EC:4.1.1.22]							KOG0629	Glutamate decarboxylase and related proteins	Amino acid transport and metabolism	METABOLISM	CAMPEP_0190740218-CAMNT_0034564237	52.98			Picocystis salinarum CCMP1897	88271	Eukaryota	Archaeplastida	93930	359	0.7675	7	6	Eukaryota;Archaeplastida;Chlorophyta;Chlorodendrophyceae;Chlorodendrales;Chlorodendrales_X;Tetraselmis;Tetraselmis chuii, Strain PLY429	PF00282	Pyridoxal-dependent decarboxylase conserved domain						0	0	61
contig_144545_1_378_+	378	378									KOG1399	Flavin-containing monooxygenase	Secondary metabolites biosynthesis, transport and catabolism	METABOLISM	CAMPEP_0206133294-CAMNT_0053524851	48.89			Pycnococcus provasolii RCC251	-311181	Eukaryota	Archaeplastida	93930	359	0.9655	4	4	Eukaryota;Archaeplastida;Chlorophyta;Prasino-Clade-V;Prasino-Clade-V_X;Pycnococcaceae;Pycnococcus;Pycnococcus provasolii RCC2336	PF00743	Flavin-binding monooxygenase-like						0	0	149
contig_14476_385_807_+	828	423													GSVIVT01036378001-18_randomIGGP_12x	30.36	Whole genome shotgun sequence of line PN40024, scaffold_82.assembly12x [Source:UniProtKB/TrEMBL;Acc:D7TLE5]	CAM_CRCL_4088608	Vitis vinifera	29760	Eukaryota	Archaeplastida	93930	359	1	1	1	Eukaryota;Archaeplastida;Streptophyta;Embryophyceae;Embryophyceae_X;Embryophyceae_XX;Vitis;Vitis vinifera								0	231	31
contig_145013_21_366_-	366	346	smm:Smp_078560	zinc finger protein						C4QIF3	KOG1721	FOG: Zn-finger	General function prediction only	POORLY CHARACTERIZED	CAMPEP_0185853040-CAMNT_0028554437	38.18			Erythrolobus madagascarensis, Strain CCMP3276	708628	Eukaryota	Archaeplastida	93930	359	0.8075	7	5	Eukaryota;Archaeplastida;Rhodophyta;Rhodophyceae;Porphyridiales-1;Porphyridiaceae;Erythrolobus;Erythrolobus madagascarensis, Strain CCMP3276	PF12756||PF13894	PF12756||PF13894						0	4	201
contig_145355_991_1432_-	1433	442	pva:Pvag_pPag30399	monooxygenase, FAD-binding protein						D6YR35					CAMPEP_0188154660-CAMNT_0031478035	57.02			Fragilariopsis kerguelensis L26_C5	-311232	Eukaryota	Archaeplastida	93930	359	0.6725	4	4	Eukaryota;Archaeplastida;Chlorophyta;Prasinophyceae;Prasinophyceae_X;Prasinophyceae_XX;Prasinophyceae_XXX;Unidentified sp, Strain CCMP2175								0	145	79
contig_145666_1_404_-	404	404	phu:Phum_PHUM317680	histone RNA hairpin-binding protein, putative						E0VMR0	KOG3934	Histone mRNA stem-loop binding protein	RNA processing and modification	INFORMATION STORAGE AND PROCESSING	CAMPEP_0196663608-CAMNT_0041999497	48.75			Cyanoptyche gloeocystis , Strain SAG4.97	-283593	Eukaryota	Archaeplastida	93930	359	0.736	3	3	Eukaryota;Archaeplastida;Glaucocystophyta;Glaucocystophyceae;Glaucocystophytes;Cyanoptycaceae;Cyanoptyche;Cyanoptyche gloeocystis, Strain SAG4.97	PF15247||_GAP_	PF15247||_GAP_						0	10	592
contig_147122_83_544_-	544	462	vcn:VOLCADRAFT_81576	hstH2A-9; histone H2A; K11251 histone H2A							KOG1756	Histone 2A	Chromatin structure and dynamics	INFORMATION STORAGE AND PROCESSING	CAMPEP_0117571748-CAMNT_0005369969	48.96			Gymnodinium catenatum	39447	Eukaryota	Archaeplastida	93930	359	0.5393	25	18	Eukaryota;Archaeplastida;Chlorophyta;Chlorophyceae;Chlorophyceae_X;CW-Chlamydomonadales;Volvox;Volvox carteri	_GAP_||PF00125||_GAP_	_GAP_||Core histone H2A/H2B/H3/H4||_GAP_						0	1	121
contig_147200_72_524_+	524	453													CAMPEP_0206118070-CAMNT_0053507835	28.7			Unidentified sp, Strain CCMP2175	1461546	Eukaryota	Archaeplastida	93930	359	1	1	1	Eukaryota;Archaeplastida;Chlorophyta;Prasinophyceae;Prasinophyceae_X;Prasinophyceae_XX;Prasinophyceae_XXX;Unidentified sp, Strain CCMP2175								0	0	84
contig_147587_768_1082_+	1308	315	tet:TTHERM_00558620	Tubulin/FtsZ family, GTPase domain containing protein; K07374 tubulin alpha											gi7958;-TTA	97.37	tubulin alpha chain.	CAM_CRCL_26955294	Tetrahymena thermophila	5911	Eukaryota	Archaeplastida	93930	359	0.5581	99	53	Eukaryota;Archaeplastida;Streptophyta;Embryophyceae;Embryophyceae_X;Embryophyceae_XX;Zea;Zea mays	PF03953	Tubulin C-terminal domain						0	22	153
contig_147649_29_879_-	879	851	ppp:PHYPADRAFT_79687	hypothetical protein						A9SI63					ACYPI007568-PA-EQ113277Acyr2	43.2	similar to PR-5-like protein [Source:RefSeq peptide predicted;Acc:XP_001951906]	CAM_CRCL_9248	Acyrthosiphon pisum	7029	Eukaryota	Archaeplastida	93930	359	0.684	4	3	Eukaryota;Archaeplastida;Streptophyta;Embryophyceae;Embryophyceae_X;Embryophyceae_XX;Physcomitrella;Physcomitrella patens	_GAP_||PF00314	_GAP_||Thaumatin family						0	2	141
contig_148166_115_480_-	480	366													CAMPEP_0203019508-CAMNT_0049761265	28.43			Micromonas pusilla CCAC1681	-311174	Eukaryota	Archaeplastida	93930	359	1	1	1	Eukaryota;Archaeplastida;Chlorophyta;Mamiellophyceae;Mamiellales;Mamiellaceae;Micromonas;Micromonas pusilla CCAC1681								0	14	251
contig_148320_119_469_+	469	351	rno:303547	Ezh1; enhancer of zeste homolog 1 (Drosophila) (EC:2.1.1.43); K11430 enhancer of zeste [EC:2.1.1.43]							KOG1079	Transcriptional repressor EZH1	Transcription	INFORMATION STORAGE AND PROCESSING	CAMPEP_0196570638-CAMNT_0041887189	40.78			Pyramimonas amylifera, Strain CCMP720	-283589	Eukaryota	Archaeplastida	93930	359	0.4599	5	5	Eukaryota;Archaeplastida;Chlorophyta;Pyramimonadales;Pyramimonadales_X;Pyramimonadales_XX;Pyramimonas;Pyramimonas amylifera, Strain CCMP720								0	3	397
contig_148425_1_337_-	337	337													PY05977-pyo5106	35.23	erythrocyte binding protein		Plasmodium yoelii yoelii 17XNL	352914	Eukaryota	Archaeplastida	93930	359	0.6208	5	4	Eukaryota;Archaeplastida;Chlorophyta;Chlorophyceae;Chlorophyceae_X;CW-Chlamydomonadales;Polytomella;Polytomella parva								0	2	192
contig_148653_1_382_+	382	382	dan:Dana_GF14338	GF14338 gene product from transcript GF14338-RA; K13982 probable ATP-dependent RNA helicase DDX4 [EC:3.6.4.13]		K13982	probable ATP-dependent RNA helicase DDX4 [EC:3.6.4.13]		3.6.4.13	B3MMA0	KOG0335	ATP-dependent RNA helicase	RNA processing and modification	INFORMATION STORAGE AND PROCESSING	Dmel_CG3506-AE014134	61.11	vas; vasa (EC:2.7.7.- 3.6.1.3); K13982 probable ATP-dependent RNA helicase DDX4 [EC:3.6.4.13]	CAM_CRCL_10096	Drosophila melanogaster	7227	Eukaryota	Archaeplastida	93930	359	0.6277	9	9	Eukaryota;Opisthokonta;Metazoa;Arthropoda;Hexapoda;Insecta;Drosophila;Drosophila ananassae	PF00270	DEAD/DEAH box helicase						0	0	149
contig_149090_1_473_-	473	473	dgr:Dgri_GH12085	GH12085 gene product from transcript GH12085-RA						B4JKA2					BGIOSGA032959-PA-10Jan_2005	31.58	Putative uncharacterized protein [Source:UniProtKB/TrEMBL;Acc:A2Z7H6]	CAM_CRCL_55546	Oryza sativa Indica Group	39946	Eukaryota	Archaeplastida	93930	359	0.977	2	2	Eukaryota;Archaeplastida;Streptophyta;Embryophyceae;Embryophyceae_X;Embryophyceae_XX;Oryza;Oryza sativa (japonica cultivar-group) mitochondrial	PF00651||_GAP_	BTB/POZ domain||_GAP_						0	2	82
contig_149135_1_331_+	331	331													StMg1_010100032361-NZ_ABJF01000425	31.73	hypothetical protein	CAM_CRCL_13917	Streptomyces Mg1	465541	Eukaryota	Archaeplastida	93930	359	0.3533	5	5	Eukaryota;Archaeplastida;Chlorophyta;Mamiellophyceae;Mamiellales;Bathycoccaceae;Ostreococcus;Ostreococcus mediterraneus clade-D-RCC2572								0	0	52
contig_150123_85_282_-	327	198													CAMPEP_0197613704-CAMNT_0043182569	50			Mamiellaceae RCC2288	1155430	Eukaryota	Archaeplastida	93930	359	1	1	1	Eukaryota;Archaeplastida;Chlorophyta;Mamiellophyceae;Mamiellales;Mamiellaceae;Mamiellaceae sp;Mamiellaceae RCC2288								0	5	87
contig_150422_72_405_+	405	334									KOG1995	Conserved Zn-finger protein	General function prediction only	POORLY CHARACTERIZED	CAMPEP_0182908732-CAMNT_0025044929	57.69			Nephroselmis pyriformis, Strain CCMP717	156128	Eukaryota	Archaeplastida	93930	359	0.6354	5	5	Eukaryota;Archaeplastida;Chlorophyta;Trebouxiophyceae;Chlorellales;Chlorellales_X;Chlorella;Chlorella variabilis	PF00076	RNA recognition motif. (a.k.a. RRM, RBD, or RNP domain)						0	0	199
contig_150528_1_392_+	392	392													CAMPEP_0190202392-CAMNT_0033915203	31.09			Micromonas sp. NEPCC29	-311216	Eukaryota	Archaeplastida	93930	359	1	1	1	Eukaryota;Archaeplastida;Chlorophyta;Mamiellophyceae;Mamiellales;Mamiellaceae;Micromonas;Micromonas sp. NEPCC29								0	1	83
contig_150613_42_508_+	508	467	nve:NEMVE_v1g210690	hypothetical protein						A7SDP9	KOG2689	Predicted ubiquitin regulatory protein	Posttranslational modification, protein turnover, chaperones	CELLULAR PROCESSES AND SIGNALING	CAMPEP_0196588690-CAMNT_0041911263	33.12			Pyramimonas amylifera, Strain CCMP720	-283589	Eukaryota	Archaeplastida	93930	359	0.6808	3	3	Eukaryota;Archaeplastida;Chlorophyta;Mamiellophyceae;Dolichomastigales;Crustomastigaceae;Crustomastix;Crustomastix stigmata, Strain CCMP3273	PF00627||_GAP_	UBA/TS-N domain||_GAP_						0	0	72
contig_151055_17_335_+	335	319													CAMPEP_0198724090-CAMNT_0044485493	31.46			Cyanoptycaceae	-283599	Eukaryota	Archaeplastida	93930	359	1	1	1	Eukaryota;Archaeplastida;Rhodophyta;Unclassified_Rhodophyta;Unclassified_Rhodophyta_X;Unclassified_Rhodophyta_XX;Coastal Red Alga;Cyanoptycaceae sp.	PF12937||_GAP_	F-box-like||_GAP_						0	0	61
contig_151544_736_837_+	1430	102													Mesau_02755-NC_019973	51.61	cytochrome c oxidase, subunit I		Mesorhizobium australicum WSM2073	754035	Eukaryota	Archaeplastida	93930	359	0.3995	7	7	Eukaryota;Archaeplastida;Chlorophyta;Prasino-Clade-V;Prasino-Clade-V_X;Pycnococcaceae;Pycnococcus;Pycnococcus provasolii, Strain RCC931								1	0	80
contig_151550_1060_1386_-	1405	327													CAMPEP_0193710560-CAMNT_0038220547	37.18			Chrysochromulina polylepis CCMP1757	-311224	Eukaryota	Archaeplastida	93930	359	0.684	2	2	Eukaryota;Archaeplastida;Chlorophyta;Mamiellophyceae;Mamiellales;Mamiellaceae;Micromonas;Micromonas sp. NEPCC29								0	2	75
contig_151646_1_1020_+	1572	1020	bln:Blon_1259	allergen V5/TPX-1 family protein						B7GRB7					HMPREF0175_0508-NZ_ACHI01000015	26.07	cell wall surface anchor family protein	CAM_CRCL_6033997	Bifidobacterium longum subsp. longum ATCC 55813	548480	Eukaryota	Archaeplastida	93930	359	0.523	2	2	Eukaryota;Archaeplastida;Chlorophyta;Mamiellophyceae;Mamiellales;Mamiellaceae;Micromonas;Micromonas sp. CCMP2099								0	7	465
contig_151699_1_687_-	755	687													CAMPEP_0202886324-CAMNT_0049569593	27.73			Chlamydomonas leiostraca, Strain SAG 11-49	1034604	Eukaryota	Archaeplastida	93930	359	0.6399	3	3	Eukaryota;Archaeplastida;Chlorophyta;Chlorophyceae;Chlorophyceae_X;CW-Chlamydomonadales;Chlamydomonas;Chlamydomonas leiostraca, Strain SAG 11-49								0	0	274
contig_151738_1_1573_+	1574	1573													CAMPEP_0198316384-CAMNT_0044019537	47.88			Madagascaria erythrocladioides	753684	Eukaryota	Archaeplastida	93930	359	1	1	1	Eukaryota;Archaeplastida;Rhodophyta;Compsopogonophyceae;Erythropeltidales;Erythrotrichiaceae;Madagascaria;Madagascaria erythrocladioides	PF09471||_GAP_	IgA Peptidase M64||_GAP_						0	0	325
contig_151863_321_626_-	701	306									KOG0800	FOG: Predicted E3 ubiquitin ligase	Posttranslational modification, protein turnover, chaperones	CELLULAR PROCESSES AND SIGNALING	CAMPEP_0191510508-CAMNT_0035509891	51.85			Rhodella maculata CCMP736	38298	Eukaryota	Archaeplastida	93930	359	0.776	2	2	Eukaryota;Archaeplastida;Rhodophyta;Rhodellophyceae;Rhodellales;Rhodellales_X;Rhodella;Rhodella maculata CCMP736	_GAP_||PF13639	_GAP_||Ring finger domain						0	0	73
contig_151929_634_1108_+	1109	475													CAMPEP_0182913564-CAMNT_0025050291	67.65			Nephroselmis pyriformis, Strain CCMP717	156128	Eukaryota	Archaeplastida	93930	359	0.8373	2	2	Eukaryota;Archaeplastida;Chlorophyta;Nephroselmidophyceae;Nephroselmidophyceae_X;Nephroselmidaceae;Nephroselmis;Nephroselmis pyriformis, Strain CCMP717								0	4	255
contig_151981_1_828_-	856	828	cre:CHLREDRAFT_192990	hypothetical protein						A8J940					EDO99602-DS496145v3	62.5	hypothetical protein	CAM_CRCL_4050842	Chlamydomonas reinhardtii	3055	Eukaryota	Archaeplastida	93930	359	0.8276	25	21	Eukaryota;Archaeplastida;Chlorophyta;Mamiellophyceae;Mamiellales;Bathycoccaceae;Ostreococcus;Ostreococcus mediterraneus clade-D-RCC1621	_GAP_||PF09418	_GAP_||Protein of unknown function (DUF2009)						0	5	202
contig_151991_1_981_-	1065	981									KOG0250	DNA repair protein RAD18 (SMC family protein)	Replication, recombination and repair	INFORMATION STORAGE AND PROCESSING	POPTR_0003s10690.1-3JGI2	33.33		CAM_CRCL_6045413	Populus trichocarpa	3694	Eukaryota	Archaeplastida	93930	359	0.8304	5	4	Eukaryota;Archaeplastida;Streptophyta;Embryophyceae;Embryophyceae_X;Embryophyceae_XX;Populus;Populus trichocarpa	PF13476||_GAP_	PF13476||_GAP_						0	14	319
contig_152339_1_1114_+	1536	1114	aas:Aasi_1441	hypothetical protein						B3EU29					CAMPEP_0183792728-CAMNT_0026037095	34.4			Crustomastix stigmata, Strain CCMP3273	195967	Eukaryota	Archaeplastida	93930	359	1	1	1	Eukaryota;Archaeplastida;Chlorophyta;Mamiellophyceae;Dolichomastigales;Crustomastigaceae;Crustomastix;Crustomastix stigmata, Strain CCMP3273								0	6	1738
contig_152390_632_799_-	799	168									KOG1542	Cysteine proteinase Cathepsin F	Posttranslational modification, protein turnover, chaperones	CELLULAR PROCESSES AND SIGNALING	PAC:15417601-scaffold_5	64.81		CAM_CRCL_4001712	Selaginella moellendorffii	88036	Eukaryota	Archaeplastida	93930	359	0.7291	7	3	Eukaryota;Archaeplastida;Streptophyta;Embryophyceae;Embryophyceae_X;Embryophyceae_XX;Selaginella;Selaginella moellendorffii	PF00112	Papain family cysteine protease						0	0	195
contig_152568_159_608_+	608	450													CAMPEP_0190211354-CAMNT_0033925025	58.5			Micromonas sp. NEPCC29	-311216	Eukaryota	Archaeplastida	93930	359	1	1	1	Eukaryota;Archaeplastida;Chlorophyta;Mamiellophyceae;Mamiellales;Mamiellaceae;Micromonas;Micromonas sp. NEPCC29								0	39	810
contig_15293_1_434_-	434	434													CAMPEP_0198446580-CAMNT_0044167795	53.66			Prasinophyceae RCC701	1461543	Eukaryota	Archaeplastida	93930	359	0.7429	14	5	Eukaryota;Archaeplastida;Chlorophyta;Prasinophyceae;Prasinophyceae_X;Prasinophyceae_XX;Prasinophyceae_XXX;Prasinophyceae RCC701								0	44	86
contig_152990_136_681_+	1071	546	ppp:PHYPADRAFT_107867	ArfA15; Arf1_5/ArfA-family small GTPase						A9TBY9	KOG0070	GTP-binding ADP-ribosylation factor Arf1	Intracellular trafficking, secretion, and vesicular transport	CELLULAR PROCESSES AND SIGNALING	ESTEXT_FGENESH1_PM.C_2010009-scaffold_201Phypa1	86.42	subsp. patens Arf1_5/ArfA-family small GTPase (ArfA15) mRNA, complete cds [source:RefSeq_dna_predicted;Acc:XM_001776095.1]	CAM_CRCL_882	Physcomitrella patens	3218	Eukaryota	Archaeplastida	93930	359	0.5678	145	91	Eukaryota;Archaeplastida;Streptophyta;Embryophyceae;Embryophyceae_X;Embryophyceae_XX;Zea;Zea mays	PF00025	ADP-ribosylation factor family	TIGR00231	small GTP-binding protein domain				0	6	518
contig_153142_1_371_+	371	371													CAMPEP_0193993676-CAMNT_0038616407	38.36			Gloeochaete witrockiana SAG46_84	38269	Eukaryota	Archaeplastida	93930	359	0.684	2	2	Eukaryota;Archaeplastida;Glaucocystophyta;Glaucocystophyceae;Glaucocystophytes;Glaucocystophytes_X;Gloeochaete;Gloeochaete witrockiana SAG46_84								0	0	263
contig_153258_1_682_+	682	682									KOG2323	Pyruvate kinase	Carbohydrate transport and metabolism	METABOLISM	CAMPEP_0113745438-CAMNT_0000685567	42.26			Eutreptiella gymnastica-like, Strain CCMP1594	73025	Eukaryota	Archaeplastida	93930	359	0.6011	5	5	Eukaryota;Opisthokonta;Metazoa;Arthropoda;Hexapoda;Insecta;Acyrthosiphon;Acyrthosiphon pisum	_GAP_||PF00224	_GAP_||Pyruvate kinase, barrel domain						0	9	276
contig_153381_174_452_-	452	279	smm:Smp_160440	zinc finger protein						C4QG93					CAMPEP_0191523622-CAMNT_0035527603	35			Rhodella maculata CCMP736	38298	Eukaryota	Archaeplastida	93930	359	0.6793	4	4	Eukaryota;Archaeplastida;Rhodophyta;Porphyridiophyceae;Porphyridiales;Porphyridiales_X;Porphyridium;Porphyridium aerugineum	_GAP_||PF00096	_GAP_||Zinc finger, C2H2 type						0	5	84
contig_153417_169_308_-	308	140													BGIOSGA004863-PA-1Jan_2005	84	Putative uncharacterized protein [Source:UniProtKB/TrEMBL;Acc:B8A6X4]	CAM_CRCL_4001203	Oryza sativa Indica Group	39946	Eukaryota	Archaeplastida	93930	359	1	1	1	Eukaryota;Archaeplastida;Streptophyta;Embryophyceae;Embryophyceae_X;Embryophyceae_XX;Oryza;Oryza sativa Indica Group								0	17	1117
contig_153561_1_622_-	622	622													FSAG_01542-NZ_GG657937	25.35	hypothetical protein	CAM_CRCL_17857	Fusobacterium periodonticum 2_1_31	469599	Eukaryota	Archaeplastida	93930	359	0.4378	4	4	Eukaryota;Archaeplastida;Chlorophyta;Prasinophyceae;unclassified Prasinophyceae;unclassified Prasinophyceae_X;unclassified Prasinophyceae_XX;Prasinophyceae sp. RCC2339								0	1	101
contig_153647_70_508_-	508	439									KOG1616	Protein involved in Snf1 protein kinase complex assembly	Carbohydrate transport and metabolism	METABOLISM	CAMPEP_0113965914-CAMNT_0000978513	41.77			Rhodosorus marinus CCMP769	-311207	Eukaryota	Archaeplastida	93930	359	0.9847	3	2	Eukaryota;Archaeplastida;Rhodophyta;Stylonematophyceae;Porphyridiales-2;Stylonematales-Group-II;Rhodosorus;Rhodosorus marinus CCMP769								0	8	208
contig_153916_262_716_-	716	455													CAMPEP_0186633774-CAMNT_0029485859	37.1			Aurantiochytrium limacinum ATCCMYA1381	87120	Eukaryota	Archaeplastida	93930	359	0.6761	7	6	Eukaryota;Archaeplastida;Rhodophyta;Stylonematophyceae;Porphyridiales-2;Stylonematales-Group-II;Rhodosorus;Rhodosorus marinus CCMP769								0	0	53
contig_154678_1_323_+	323	323													CAMPEP_0181145288-CAMNT_0023232335	33.77			Micromonas sp. CCMP1646	-311170	Eukaryota	Archaeplastida	93930	359	1	1	1	Eukaryota;Archaeplastida;Chlorophyta;Mamiellophyceae;Mamiellales;Mamiellaceae;Micromonas;Micromonas sp. CCMP1646								0	0	91
contig_154871_1_487_-	487	487													CAMPEP_0118960718-CAMNT_0006908869	30.88			Pyramimonas obovata CCMP722	-311159	Eukaryota	Archaeplastida	93930	359	1	1	1	Eukaryota;Archaeplastida;Chlorophyta;Pyramimonadales;Pyramimonadales_X;Pyramimonadales_XX;Pyramimonas;Pyramimonas obovata CCMP722								0	2	54
contig_154912_1_450_-	450	450													EFQ30398-GG697349GCA_000149035	32.06	tetratricopeptide		Colletotrichum graminicola M1.001	645133	Eukaryota	Archaeplastida	93930	359	0.684	2	2	Eukaryota;Archaeplastida;Streptophyta;Embryophyceae;Embryophyceae_X;Embryophyceae_XX;Populus;Populus trichocarpa								0	4	60
contig_155030_49_367_-	367	319	dan:Dana_GF10403	GF10403 gene product from transcript GF10403-RA						B3MAH2					CAMPEP_0198733146-CAMNT_0044496399	32.43			Cyanoptycaceae	-283599	Eukaryota	Archaeplastida	93930	359	0.6593	4	4	Eukaryota;Opisthokonta;Metazoa;Arthropoda;Hexapoda;Insecta;Apis;Apis mellifera								0	18	358
contig_155249_1_425_+	425	425													CAMPEP_0191523162-CAMNT_0035527037	54.29			Rhodella maculata CCMP736	38298	Eukaryota	Archaeplastida	93930	359	1	1	1	Eukaryota;Archaeplastida;Rhodophyta;Rhodellophyceae;Rhodellales;Rhodellales_X;Rhodella;Rhodella maculata CCMP736								0	4	104
contig_155936_1_553_-	553	553													134105-ChlNC64A_scaffold_10	42.19			Chlorella variabilis	554065	Eukaryota	Archaeplastida	93930	359	1	1	1	Eukaryota;Archaeplastida;Chlorophyta;Trebouxiophyceae;Chlorellales;Chlorellales_X;Chlorella;Chlorella variabilis								0	8	44
contig_15595_1_325_-	325	325	bac:BamMC406_5361	filamentous haemagglutinin outer membrane protein						B1Z1V0					CAMPEP_0119123012-CAMNT_0007112749	32.99			Prasinophyceae sp. RCC2339	-311193	Eukaryota	Archaeplastida	93930	359	1	1	1	Eukaryota;Archaeplastida;Chlorophyta;Prasinophyceae;unclassified Prasinophyceae;unclassified Prasinophyceae_X;unclassified Prasinophyceae_XX;Prasinophyceae sp. RCC2339								0	769	14
contig_156126_1_636_+	636	636	isc:IscW_ISCW000201	zinc finger protein, putative						B7P6S8					CAMPEP_0182450080-CAMNT_0024647571	32.99			Timspurckia oligopyrenoides	708627	Eukaryota	Archaeplastida	93930	359	0.6026	4	4	Eukaryota;Archaeplastida;Rhodophyta;Rhodophyceae;Porphyridiales-1;Porphyridiales_1X;Timspurckia;Timspurckia oligopyrenoides	PF13894||_GAP_	PF13894||_GAP_						0	2	262
contig_156612_706_928_+	928	223													CAMPEP_0177778012-CAMNT_0019297223	98.63			Tetraselmis chuii, Strain PLY429	63592	Eukaryota	Archaeplastida	93930	359	0.5484	120	67	Eukaryota;Archaeplastida;Streptophyta;Embryophyceae;Embryophyceae_X;Embryophyceae_XX;Zea;Zea mays	PF03953	Tubulin C-terminal domain						0	21	649
contig_157041_136_365_+	365	230													CAMPEP_0206078542-CAMNT_0053457933	48.28			Unidentified, Strain CCMP1205	44458	Eukaryota	Archaeplastida	93930	359	0.9071	4	3	Eukaryota;Archaeplastida;Chlorophyta;Mamiellophyceae;Mamiellales;Mamiellaceae;Micromonas;Micromonas sp. CCMP2099								0	40	1094
contig_157207_17_301_-	758	285													CAMPEP_0199752290-CAMNT_0045624921	76.25			Acanthoeca-like, Strain 10tr	-289844	Eukaryota	Archaeplastida	93930	359	0.5786	3	3	Eukaryota;Archaeplastida;Chlorophyta;Mamiellophyceae;Mamiellales;Mamiellaceae;Micromonas;Micromonas pusilla RCC1614								0	18	701
contig_157250_147_345_-	345	199	hor:Hore_09280	MATE efflux family protein						B8CWL5					Hore_09280-NC_011899	33.9	MATE efflux family protein	CAM_CRCL_32363469	Halothermothrix orenii H 168	373903	Eukaryota	Archaeplastida	93930	359	0.6415	3	3	Eukaryota;Archaeplastida;Streptophyta;Embryophyceae;Embryophyceae_X;Embryophyceae_XX;Ricinus;Ricinus communis	PF01554	MatE						1	0	250
contig_157373_1_394_-	394	394									KOG2075	Topoisomerase TOP1-interacting protein BTBD1	Function unknown	POORLY CHARACTERIZED	CAMPEP_0192428242-CAMNT_0036600223	30.63			Symbiodinium sp C15	226949	Eukaryota	Archaeplastida	93930	359	0.7709	15	8	Eukaryota;Archaeplastida;Streptophyta;Embryophyceae;Embryophyceae_X;Embryophyceae_XX;Oryza;Oryza sativa (japonica cultivar-group) mitochondrial	PF00651||_GAP_	BTB/POZ domain||_GAP_						0	4	440
contig_157526_1_318_-	318	318	tet:TTHERM_00558620	Tubulin/FtsZ family, GTPase domain containing protein; K07374 tubulin alpha							KOG1376	Alpha tubulin	Cytoskeleton	CELLULAR PROCESSES AND SIGNALING	GRMZM2G153292_P05-1AGPv2	78.08	Tubulin alpha-1 chain (Alpha-1-tubulin) [Source:UniProtKB/Swiss-Prot;Acc:P14640]	CAM_CRCL_138	Zea mays	4577	Eukaryota	Archaeplastida	93930	359	0.7913	7	5	Eukaryota;Archaeplastida;Streptophyta;Embryophyceae;Embryophyceae_X;Embryophyceae_XX;Selaginella;Selaginella moellendorffii	PF00091||_GAP_	Tubulin/FtsZ family, GTPase domain||_GAP_						0	6	107
contig_157631_1_355_-	355	355									KOG1721	FOG: Zn-finger	General function prediction only	POORLY CHARACTERIZED	CAMPEP_0185857884-CAMNT_0028560157	34.62			Erythrolobus madagascarensis, Strain CCMP3276	708628	Eukaryota	Archaeplastida	93930	359	0.6026	8	7	Eukaryota;Archaeplastida;Rhodophyta;Rhodophyceae;Porphyridiales-1;Porphyridiaceae;Erythrolobus;Erythrolobus madagascarensis, Strain CCMP3276								0	1	372
contig_157669_1_334_+	366	334	lil:LA_2964	hypothetical protein						Q8F213					BRADI2G34827.1-2Brachy1	27.36		CAM_CRCL_4076349	Brachypodium distachyon	15368	Eukaryota	Archaeplastida	93930	359	1	2	1	Eukaryota;Archaeplastida;Streptophyta;Embryophyceae;Embryophyceae_X;Embryophyceae_XX;Brachypodium;Brachypodium distachyon								0	0	106
contig_157708_138_605_-	645	468													jgi_96340_25.m000604-MicpuN2	38.96	rubredoxin	CAM_CRCL_14707497	Micromonas RCC299	296587	Eukaryota	Archaeplastida	93930	359	1	1	1	Eukaryota;Archaeplastida;Chlorophyta;Mamiellophyceae;Mamiellales;Mamiellaceae;Micromonas;Micromonas RCC299								0	0	180
contig_157752_71_322_-	322	252	ppp:PHYPADRAFT_211478	hypothetical protein; K07374 tubulin alpha	ppp04145	K07374	tubulin alpha	Phagosome || Gap junction || Pathogenic Escherichia coli infection		A9SEI4	KOG1376	Alpha tubulin	Cytoskeleton	CELLULAR PROCESSES AND SIGNALING	CAMPEP_0168607764-CAMNT_0008647647	97.56			Strombidium rassoulzadegani, Strain ras09	1082188	Eukaryota	Archaeplastida	93930	359	0.6659	109	54	Eukaryota;Archaeplastida;Streptophyta;Embryophyceae;Embryophyceae_X;Embryophyceae_XX;Selaginella;Selaginella moellendorffii	PF00091	Tubulin/FtsZ family, GTPase domain						0	8	129
contig_157905_1_328_-	328	328	phu:Phum_PHUM446350	krueppel c2h2-type zinc finger protein, putative; K09228 KRAB domain-containing zinc finger protein		K09228	KRAB domain-containing zinc finger protein			E0VU67					ORF97756-Lotgi1	40.32	zinc finger protein	CAM_CRCL_4176984	Lottia gigantea	225164	Eukaryota	Archaeplastida	93930	359	0.5786	3	3	Eukaryota;Archaeplastida;Rhodophyta;Compsopogonophyceae;Erythropeltidales;Erythrotrichiaceae;Madagascaria;Madagascaria erythrocladioides	_GAP_||PF13894	_GAP_||PF13894						0	6	148
contig_15794_1_592_+	592	592	srm:PSR_61030	conserved hypothetical protein containing fibronectin, type III domain											jgi_86395_32.m000292-MicpuN2	46.63	hypothetical protein	CAM_CRCL_4082693	Micromonas RCC299	296587	Eukaryota	Archaeplastida	93930	359	0.568	9	7	Eukaryota;Archaeplastida;Chlorophyta;Mamiellophyceae;Mamiellales;Mamiellaceae;Micromonas;Micromonas RCC299	PF03382	Mycoplasma protein of unknown function, DUF285	_GAP_||TIGR02167	_GAP_||bacterial surface protein 26-residue repeat				0	122	149
contig_158361_88_330_+	366	243	hsa:360023	ZBTB41, DKFZp686C06120, FLJ36199, FRBZ1, RP11-469L3.1, ZNF924; zinc finger and BTB domain containing 41; K10513 zinc finger and BTB domain-containing protein 41							KOG1721	FOG: Zn-finger	General function prediction only	POORLY CHARACTERIZED	CAMPEP_0193124374-CAMNT_0037471629	39.06			Thraustochytrium sp LLF1b	1112570	Eukaryota	Archaeplastida	93930	359	0.684	2	2	Eukaryota;Archaeplastida;Rhodophyta;Rhodellophyceae;Rhodellales;Rhodellales_X;Rhodella;Rhodella maculata CCMP736	PF13894	PF13894						0	0	87
contig_158729_1_309_-	309	309	pfa:PFD0970c	zinc finger protein, putative						Q8I1N9					PFD0970c-NC_004318	26.8	zinc finger protein, putative	CAM_CRCL_14183147	Plasmodium falciparum 3D7	36329	Eukaryota	Archaeplastida	93930	359	0.7893	3	2	Eukaryota;Archaeplastida;Chlorophyta;Chlorodendrophyceae;Chlorodendrales;Chlorodendrales_X;Tetraselmis;Tetraselmis striata, Strain LANL1001								0	21	98
contig_160183_1_430_+	1119	430	pto:PTO0995	sdhA; succinate dehydrogenase flavoprotein subunit (EC:1.3.5.1); K00239 succinate dehydrogenase flavoprotein subunit [EC:1.3.99.1]	pto00650||pto00623||pto00020||pto01120||pto01110||pto01100||pto00190	K00239	succinate dehydrogenase flavoprotein subunit [EC:1.3.5.1]	Citrate cycle (TCA cycle) || Oxidative phosphorylation || Butanoate metabolism || Carbon fixation pathways in prokaryotes || Carbon metabolism || Legionellosis	1.3.99.1	Q6L0C2					CAMPEP_0190446946-CAMNT_0034205501	41.76			Oxyrrhis marina LB1974	-311155	Eukaryota	Archaeplastida	93930	359	0.774	3	3	Eukaryota;Archaeplastida;Chlorophyta;Mamiellophyceae;Mamiellales;Mamiellaceae;Micromonas;Micromonas pusilla RCC2306	PF02910	domain						0	1	68
contig_160253_1_483_+	483	483	olu:OSTLU_37273	hypothetical protein						A4RWT4	KOG1176	Acyl-CoA synthetase	Lipid transport and metabolism	METABOLISM	CAMPEP_0202899060-CAMNT_0049585147	56.67			Chlamydomonas chlamydogama, Strain SAG 11-48b	225041	Eukaryota	Archaeplastida	93930	359	1	1	1	Eukaryota;Archaeplastida;Chlorophyta;Chlorophyceae;Chlorophyceae_X;CW-Chlamydomonadales;Chlamydomonas;Chlamydomonas chlamydogama, Strain SAG 11-48b	PF00501||PF13193	AMP-binding enzyme||PF13193						0	1	66
contig_161331_1_918_-	1390	918	pfa:PFC0335c	conserved Plasmodium protein, unknown function						O77320					CAMPEP_0113961768-CAMNT_0000973485	59.02			Rhodosorus marinus CCMP769	-311207	Eukaryota	Archaeplastida	93930	359	1	1	1	Eukaryota;Archaeplastida;Rhodophyta;Stylonematophyceae;Porphyridiales-2;Stylonematales-Group-II;Rhodosorus;Rhodosorus marinus CCMP769								0	14	342
contig_161346_1_679_+	679	679	rno:498836	LRRG00125											CAMPEP_0181319304-CAMNT_0023426883	39.63			Rhodomonas abbreviata, Strain Caron Lab Isolate	46948	Eukaryota	Archaeplastida	93930	359	0.5786	3	3	Eukaryota;Archaeplastida;Chlorophyta;Chlorodendrophyceae;Chlorodendrales;Chlorodendrales_X;Tetraselmis;Tetraselmis striata, Strain LANL1001								0	119	1767
contig_161366_861_1201_+	1202	341													CAMPEP_0181146980-CAMNT_0023234037	50			Micromonas sp. CCMP1646	-311170	Eukaryota	Archaeplastida	93930	359	0.819	4	4	Eukaryota;Archaeplastida;Chlorophyta;Mamiellophyceae;Mamiellales;Mamiellaceae;Micromonas;Micromonas pusilla RCC2306								1	2	512
contig_161372_1041_1346_+	1372	306													CAMPEP_0182607478-CAMNT_0024826095	38.46			Picochlorum RCC944	464278	Eukaryota	Archaeplastida	93930	359	1	1	1	Eukaryota;Archaeplastida;Chlorophyta;Trebouxiophyceae;Chlorellales;Chlorellales_X;Picochlorum;Picochlorum RCC944								1	14	279
contig_161646_1_504_+	504	504													CAMPEP_0119344710-CAMNT_0007357153	51.48			Scyphosphaera apsteinii, Strain RCC1455	418940	Eukaryota	Archaeplastida	93930	359	0.684	2	2	Eukaryota;Archaeplastida;Chlorophyta;Chlorodendrophyceae;Chlorodendrales;Chlorodendrales_X;Tetraselmis;Tetraselmis striata, Strain LANL1001	PF02492||_GAP_	CobW/HypB/UreG, nucleotide-binding domain||_GAP_						0	4	75
contig_161875_22_339_-	1079	318													CAMPEP_0203044542-CAMNT_0049787923	46.15			Micromonas pusilla CCMP1723	-311176	Eukaryota	Archaeplastida	93930	359	0.8762	3	3	Eukaryota;Archaeplastida;Chlorophyta;Prasinophyceae;Prasinophyceae_X;Prasinophyceae_XX;Prasinophyceae_XXX;Unidentified sp, Strain CCMP2175								0	4	122
contig_161893_453_792_+	792	340													CAMPEP_0206077996-CAMNT_0053457281	46.15			Unidentified, Strain CCMP1205	44458	Eukaryota	Archaeplastida	93930	359	0.774	3	3	Eukaryota;Archaeplastida;Chlorophyta;Prasinophyceae;Prasinophyceae_X;Prasinophyceae_XX;Prasinophyceae_XXX;Unidentified sp, Strain CCMP2175								0	2	113
contig_162117_19_883_-	883	865													gi412992346-FO082264	32.93	PREDICTED: similar to Zinc finger protein 271 (Zinc finger protein 7) (HZF7) (Zinc finger protein ZNFphex133) (Epstein-Barr virus-induced zinc finger protein) (ZNF-EB) (CT-ZFP48) (Zinc finger protein		Bathycoccus prasinos, Strain RCC716	41875	Eukaryota	Archaeplastida	93930	359	0.8058	10	3	Eukaryota;Archaeplastida;Chlorophyta;Mamiellophyceae;Mamiellales;Bathycoccaceae;Bathycoccus;Bathycoccus prasinos, Strain RCC716	_GAP_||PF13894||PF00096	_GAP_||PF13894||Zinc finger, C2H2 type						0	9	299
contig_162188_1_337_+	337	337	dgr:Dgri_GH15893	GH15893 gene product from transcript GH15893-RA; K01866 tyrosyl-tRNA synthetase [EC:6.1.1.1]	dgr00970	K01866	tyrosyl-tRNA synthetase [EC:6.1.1.1]	Aminoacyl-tRNA biosynthesis	6.1.1.1	B4J0V7	KOG2144	Tyrosyl-tRNA synthetase, cytoplasmic	Translation, ribosomal structure and biogenesis	INFORMATION STORAGE AND PROCESSING	ENSCINP00000010550-scaffold_152JGI2	50.91		CAM_CRCL_4002082	Populus trichocarpa	3694	Eukaryota	Archaeplastida	93930	359	1	1	1	Eukaryota;Archaeplastida;Streptophyta;Embryophyceae;Embryophyceae_X;Embryophyceae_XX;Populus;Populus trichocarpa	_GAP_||PF00579	_GAP_||tRNA synthetases class I (W and Y)						0	1	153
contig_162197_1_405_+	405	405									KOG1601	GATA-4/5/6 transcription factors	Transcription	INFORMATION STORAGE AND PROCESSING		61.9					Eukaryota	Archaeplastida	93930	359	1	1	1	Eukaryota;Archaeplastida;Chlorophyta;Trebouxiophyceae;Chlorellales;Chlorellales_X;Picochlorum;Picochlorum RCC944	PF00320||_GAP_	GATA zinc finger||_GAP_						0	0	53
contig_162309_1_1292_+	1293	1292	ppp:PHYPADRAFT_139668	hypothetical protein						A9T3J2					Sb08g005450.1-8Sbi1	36.13	Putative uncharacterized protein Sb08g005450 [source:UniProtKB/TrEMBL;Acc:C5YTB0_SORBI]	CAM_CRCL_21659	Sorghum bicolor	4558	Eukaryota	Archaeplastida	93930	359	0.9518	3	3	Eukaryota;Archaeplastida;Streptophyta;Embryophyceae;Embryophyceae_X;Embryophyceae_XX;Oryza;Oryza sativa (japonica cultivar-group) mitochondrial								0	11	868
contig_162422_334_588_-	588	255													jgi_50166_1.m000980-MicpuC2	47.22	hypothetical protein	CAM_CRCL_28892594	Micromonas pusilla CCMP1545	564608	Eukaryota	Archaeplastida	93930	359	1	1	1	Eukaryota;Archaeplastida;Chlorophyta;Mamiellophyceae;Mamiellales;Mamiellaceae;Micromonas;Micromonas pusilla CCMP1545								0	59	579
contig_162462_110_479_-	479	370													CAMPEP_0191469506-CAMNT_0035454021	41.67			Pyramimonas parkeae	36894	Eukaryota	Archaeplastida	93930	359	1	1	1	Eukaryota;Archaeplastida;Chlorophyta;Pyramimonadales;Pyramimonadales_X;Pyramimonadales_XX;Pyramimonas;Pyramimonas parkeae								2	1	66
contig_162543_1170_1365_+	1366	196									KOG1376	Alpha tubulin	Cytoskeleton	CELLULAR PROCESSES AND SIGNALING	LMXM_13_0280-lmi1647	96.88	alpha tubulin		Leishmania mexicana MHOM/GT/2001/U1103	929439	Eukaryota	Archaeplastida	93930	359	0.5322	49	33	Eukaryota;Archaeplastida;Chlorophyta;Mamiellophyceae;Mamiellales;Bathycoccaceae;Ostreococcus;Ostreococcus RCC809	PF03953||_GAP_	Tubulin C-terminal domain||_GAP_						0	2	58
contig_162543_73_1023_+	1366	951	tbr:Tb927.1.2340 || tbr:Tb927.1.2360 || tbr:Tb927.1.2380 || tbr:Tb927.1.2400	alpha tubulin; K07374 tubulin alpha || alpha tubulin; K07374 tubulin alpha || alpha tubulin; K07374 tubulin alpha || alpha tubulin; K07374 tubulin alpha	tbr04145	K07374	tubulin alpha	Phagosome || Gap junction || Pathogenic Escherichia coli infection		Q4GYY5	KOG1376	Alpha tubulin	Cytoskeleton	CELLULAR PROCESSES AND SIGNALING	CAMPEP_0204919804-CAMNT_0052093431	94.79			Climacostomum Climacostomum virens, Strain Stock W-24	49980	Eukaryota	Archaeplastida	93930	359	0.6014	113	66	Eukaryota;Archaeplastida;Streptophyta;Embryophyceae;Embryophyceae_X;Embryophyceae_XX;Selaginella;Selaginella moellendorffii	PF00091||_GAP_||PF03953	Tubulin/FtsZ family, GTPase domain||_GAP_||Tubulin C-terminal domain						0	16	487
contig_162547_1_779_-	779	779													CAMPEP_0196647484-CAMNT_0041977219	30.94			Pycnococcus sp, Strain CCM1998	-283591	Eukaryota	Archaeplastida	93930	359	1	1	1	Eukaryota;Archaeplastida;Chlorophyta;Prasino-Clade-V;Prasino-Clade-V_X;Pycnococcaceae;Pycnococcus;Pycnococcus sp, Strain CCM1998								0	0	200
contig_162687_1_571_-	571	571	ppp:PHYPADRAFT_159319	hypothetical protein						A9RIT0					ESTEXT_FGENESH1_PG.C_110206-scaffold_11Phypa1	27.08	subsp. patens predicted protein (PHYPADRAFT_159319) mRNA, complete cds [source:RefSeq_dna_predicted;Acc:XM_001753975.1]		Physcomitrella patens	3218	Eukaryota	Archaeplastida	93930	359	1	1	1	Eukaryota;Archaeplastida;Streptophyta;Embryophyceae;Embryophyceae_X;Embryophyceae_XX;Physcomitrella;Physcomitrella patens								0	8	194
contig_163115_271_726_+	789	456													CAMPEP_0190203218-CAMNT_0033916137	40.94			Micromonas sp. NEPCC29	-311216	Eukaryota	Archaeplastida	93930	359	1	1	1	Eukaryota;Archaeplastida;Chlorophyta;Mamiellophyceae;Mamiellales;Mamiellaceae;Micromonas;Micromonas sp. NEPCC29								0	2	165
contig_163379_126_506_-	506	381													BGIOSGA030843-PA-9Jan_2005	35.04	Putative uncharacterized protein [source:Uniprot/SPTREMBL;Acc:B8BCF5_ORYSI]	CAM_CRCL_7001	Oryza sativa Indica Group	39946	Eukaryota	Archaeplastida	93930	359	0.9693	3	3	Eukaryota;Archaeplastida;Streptophyta;Embryophyceae;Embryophyceae_X;Embryophyceae_XX;Oryza;Oryza glaberrima								0	4	114
contig_163752_1_441_-	759	441									KOG3379	Diadenosine polyphosphate hydrolase and related proteins of the histidine triad (HIT) family	Nucleotide transport and metabolism	METABOLISM		53.17					Eukaryota	Archaeplastida	93930	359	0.7166	17	16	Eukaryota;Archaeplastida;Chlorophyta;Mamiellophyceae;Mamiellales;Bathycoccaceae;Ostreococcus;Ostreococcus RCC809	PF01230	HIT domain						0	0	73
contig_163887_1_346_+	465	346	bcm:Bcenmc03_1547	curculin domain-containing protein						B1K0U1					CAMPEP_0191517536-CAMNT_0035520409	42.86			Rhodella maculata CCMP736	38298	Eukaryota	Archaeplastida	93930	359	1	1	1	Eukaryota;Archaeplastida;Rhodophyta;Rhodellophyceae;Rhodellales;Rhodellales_X;Rhodella;Rhodella maculata CCMP736	PF01453	D-mannose binding lectin						0	0	57
contig_164399_1_457_-	457	457													CAMPEP_0196639324-CAMNT_0041968353	56.86			Pycnococcus sp, Strain CCM1998	-283591	Eukaryota	Archaeplastida	93930	359	0.8137	3	3	Eukaryota;Archaeplastida;Chlorophyta;Prasinophyceae;Prasinophyceae_X;Prasinophyceae_XX;Prasinophyceae_XXX;Prasinophyceae CCMP2111								0	2	63
contig_164424_187_396_-	396	210									KOG0543	FKBP-type peptidyl-prolyl cis-trans isomerase	Posttranslational modification, protein turnover, chaperones	CELLULAR PROCESSES AND SIGNALING	CAMPEP_0182859362-CAMNT_0024990957	88.24			Nephroselmis pyriformis, Strain CCMP717	156128	Eukaryota	Archaeplastida	93930	359	1	1	1	Eukaryota;Archaeplastida;Chlorophyta;Nephroselmidophyceae;Nephroselmidophyceae_X;Nephroselmidaceae;Nephroselmis;Nephroselmis pyriformis, Strain CCMP717								0	17	43
contig_164481_46_434_-	434	389	nve:NEMVE_v1g126348	hypothetical protein						A7SPU5	KOG1721	FOG: Zn-finger	General function prediction only	POORLY CHARACTERIZED	CAMPEP_0113959302-CAMNT_0000970593	31.91			Rhodosorus marinus CCMP769	-311207	Eukaryota	Archaeplastida	93930	359	0.748	9	6	Eukaryota;Archaeplastida;Rhodophyta;Stylonematophyceae;Porphyridiales-2;Stylonematales-Group-II;Rhodosorus;Rhodosorus marinus CCMP769	_GAP_||PF13894||_GAP_	_GAP_||PF13894||_GAP_						0	0	54
contig_164648_175_401_+	401	227													jgi_248106_9035.m000002-Emihu1	56.1	Antistasin family	CAM_CRCL_4007572	Emiliania huxleyi CCMP1516	280463	Eukaryota	Archaeplastida	93930	359	0.6808	3	3	Eukaryota;Archaeplastida;Chlorophyta;Prasinophyceae;unclassified Prasinophyceae;unclassified Prasinophyceae_X;unclassified Prasinophyceae_XX;Prasinophyceae sp. RCC998								0	2	60
contig_165227_1_506_+	506	506													gc00195-gc	35.9	hypothetical protein	CAM_CRCL_15043	Gracilaria changii	172969	Eukaryota	Archaeplastida	93930	359	0.684	2	2	Eukaryota;Archaeplastida;Rhodophyta;Florideophyceae;Gracilariales;Gracilariales_X;Gracilaria;Gracilaria changii	_GAP_||PF13516||_GAP_	_GAP_||PF13516||_GAP_						0	0	53
contig_165945_1_312_-	359	312	ote:Oter_0944	RNP-1 like RNA-binding protein						B1ZWV3	KOG0118	FOG: RRM domain	General function prediction only	POORLY CHARACTERIZED	CAMPEP_0199158014-CAMNT_0044882017	38.55			Vaucheria litorea, Strain CCMP2940	109269	Eukaryota	Archaeplastida	93930	359	0.4636	3	3	Eukaryota;Archaeplastida;Chlorophyta;Chlorophyceae;Chlorophyceae_X;CW-Chlamydomonadales;Chlamydomonas;Chlamydomonas chlamydogama, Strain SAG 11-48b	PF00076||_GAP_	RNA recognition motif. (a.k.a. RRM, RBD, or RNP domain)||_GAP_						0	12	466
contig_165984_144_374_+	374	231													CAMPEP_0197366986-CAMNT_0042889615	71.11			Pinguiococcus pyrenoidosus, Strain CCMP2078	172671	Eukaryota	Archaeplastida	93930	359	0.6943	11	11	Eukaryota;Archaeplastida;Chlorophyta;Mamiellophyceae;Mamiellales;Mamiellaceae;Micromonas;Micromonas pusilla CCMP1723								0	50	6356
contig_166073_1_380_-	380	380	olu:OSTLU_30925	hypothetical protein						A4RVC5					Flav2ADRAFT_1345-NZ_ABVV01000001	57.94	lipoprotein	CAM_CRCL_4029979	Flavobacteria bacterium MS024-2A	487796	Eukaryota	Archaeplastida	93930	359	0.7634	5	4	Eukaryota;Archaeplastida;Chlorophyta;Mamiellophyceae;Mamiellales;Bathycoccaceae;Ostreococcus;Ostreococcus tauri	PF03382	Mycoplasma protein of unknown function, DUF285	TIGR02167	bacterial surface protein 26-residue repeat				1	0	190
contig_166290_1_318_-	318	318	dan:Dana_GF15633	GF15633 gene product from transcript GF15633-RA; K01520 dUTP pyrophosphatase [EC:3.6.1.23]	dan01100||dan00240	K01520	dUTP pyrophosphatase [EC:3.6.1.23]	Pyrimidine metabolism	3.6.1.23	B3MND7	KOG3370	dUTPase	Nucleotide transport and metabolism	METABOLISM	CAMPEP_0168606072-CAMNT_0008645631	70.65			Pessonella PRA-29	498008	Eukaryota	Archaeplastida	93930	359	0.571	6	6	Eukaryota;Archaeplastida;Chlorophyta;Mamiellophyceae;Mamiellales;Mamiellaceae;Micromonas;Micromonas pusilla RCC2306	_GAP_||PF00692	_GAP_||dUTPase						0	2	300
contig_166390_1_420_-	420	420	dgr:Dgri_GH16297	GH16297 gene product from transcript GH16297-RA						B4IY71	KOG1721	FOG: Zn-finger	General function prediction only	POORLY CHARACTERIZED	gi412990065-FO082261	26.15	PREDICTED: similar to Zinc finger protein 271 (Zinc finger protein 7) (HZF7) (Zinc finger protein ZNFphex133) (Epstein-Barr virus-induced zinc finger protein) (ZNF-EB) (CT-ZFP48) (Zinc finger protein		Bathycoccus prasinos, Strain RCC716	41875	Eukaryota	Archaeplastida	93930	359	0.684	2	2	Eukaryota;Archaeplastida;Chlorophyta;Mamiellophyceae;Mamiellales;Bathycoccaceae;Bathycoccus;Bathycoccus prasinos, Strain RCC716	PF12756||PF13894||PF12756||PF13894	PF12756||PF13894||PF12756||PF13894						0	5	228
contig_166444_125_514_-	514	390	pyo:PY06908 || pcb:PC000994.02.0 || pbe:PB000182.03.0	calmodulin; K02183 calmodulin || calmodulin; K02183 calmodulin || calmodulin; K02183 calmodulin											CAMPEP_0113529366-CAMNT_0000427991	40.16			Odontella aurita 1302-5	265563	Eukaryota	Archaeplastida	93930	359	0.842	4	2	Eukaryota;Archaeplastida;Chlorophyta;Chlorodendrophyceae;Chlorodendrales;Chlorodendrales_X;Tetraselmis;Tetraselmis GSL018	PF13833||PF13499	PF13833||EF-hand domain pair						0	33	330
contig_166778_1_396_-	396	396													GSVIVT01011586001-1IGGP_12x	44.66	Whole genome shotgun sequence of line PN40024, scaffold_11.assembly12x [Source:UniProtKB/TrEMBL;Acc:D7T8F0]	CAM_CRCL_15866	Vitis vinifera	29760	Eukaryota	Archaeplastida	93930	359	1	1	1	Eukaryota;Archaeplastida;Streptophyta;Embryophyceae;Embryophyceae_X;Embryophyceae_XX;Vitis;Vitis vinifera	_GAP_||PF00560||_GAP_	_GAP_||Leucine Rich Repeat||_GAP_						0	0	93
contig_166851_1_285_+	321	285	cya:CYA_1022	leucine-rich repeat-containing protein						Q2JVL7					LOC_Os11g39370.2-11MSU6	53.09		CAM_CRCL_13673	Oryza sativa (japonica cultivar-group) mitochondrial	39947	Eukaryota	Archaeplastida	93930	359	0.6725	8	6	Eukaryota;Archaeplastida;Streptophyta;Embryophyceae;Embryophyceae_X;Embryophyceae_XX;Oryza;Oryza glaberrima	PF12799||PF13855	PF12799||Leucine rich repeat						0	5	323
contig_167244_1_314_-	413	314													CAMPEP_0118938252-CAMNT_0006882135	67.68			Pyramimonas obovata CCMP722	-311159	Eukaryota	Archaeplastida	93930	359	1	1	1	Eukaryota;Archaeplastida;Chlorophyta;Pyramimonadales;Pyramimonadales_X;Pyramimonadales_XX;Pyramimonas;Pyramimonas obovata CCMP722	PF05368||_GAP_	NmrA-like family||_GAP_						0	0	66
contig_167313_1_275_+	331	275	dan:Dana_GF11111	GF11111 gene product from transcript GF11111-RA						B3MI34	KOG1721	FOG: Zn-finger	General function prediction only	POORLY CHARACTERIZED	CAMPEP_0185856428-CAMNT_0028558675	35.82			Erythrolobus madagascarensis, Strain CCMP3276	708628	Eukaryota	Archaeplastida	93930	359	1	1	1	Eukaryota;Archaeplastida;Rhodophyta;Rhodophyceae;Porphyridiales-1;Porphyridiaceae;Erythrolobus;Erythrolobus madagascarensis, Strain CCMP3276								0	28	650
contig_167346_1_399_-	399	399	nve:NEMVE_v1g139188	hypothetical protein						A7SZI6	KOG1159	NADP-dependent flavoprotein reductase	Energy production and conversion	METABOLISM	DappuP311674-scaffold_4Dappu1	63.55		CAM_CRCL_3821	Daphnia pulex	6669	Eukaryota	Archaeplastida	93930	359	0.6808	3	3	Eukaryota;Opisthokonta;Metazoa;Arthropoda;Crustacea;Branchiopoda;Daphnia;Daphnia pulex	PF00258	Flavodoxin						0	0	56
contig_168220_1_283_+	283	283	atm:ANT_25430	hypothetical protein						E8MZM1					JCVI_PEP_metagenomic.orf.1126664269534.1-SAR324	54.35		CAM_CRCL_16363	SAR324 cluster bacterium JCVI-SC AAA005	1073573	Eukaryota	Archaeplastida	93930	359	0.3535	4	4	Eukaryota;Archaeplastida;Chlorophyta;Pyramimonadales;Pyramimonadales_X;Pyramimonadales_XX;Pterosperma;Pterosperma, Strain CCMP1384	PF02469	Fasciclin domain						0	7	58
contig_168285_1_261_-	261	261													CAMPEP_0202925672-CAMNT_0049619473	47.95			Micromonas sp. CS-222	-311171	Eukaryota	Archaeplastida	93930	359	0.523	2	2	Eukaryota;Archaeplastida;Chlorophyta;Mamiellophyceae;Mamiellales;Mamiellaceae;Micromonas;Micromonas sp. CS-222								2	5	93
contig_168288_1_290_-	290	290													CAMPEP_0196643696-CAMNT_0041973193	35.79			Pycnococcus sp, Strain CCM1998	-283591	Eukaryota	Archaeplastida	93930	359	1	1	1	Eukaryota;Archaeplastida;Chlorophyta;Prasino-Clade-V;Prasino-Clade-V_X;Pycnococcaceae;Pycnococcus;Pycnococcus sp, Strain CCM1998								0	5	89
contig_168548_44_404_+	404	361	pfa:PF07_0069	conserved Plasmodium protein, unknown function						Q8IBT3					Sb03g013840.1-3Sbi1	63.64	Putative uncharacterized protein Sb03g013840 [source:UniProtKB/TrEMBL;Acc:C5XJW6_SORBI]	CAM_CRCL_4021718	Sorghum bicolor	4558	Eukaryota	Archaeplastida	93930	359	0.7484	8	8	Eukaryota;Archaeplastida;Streptophyta;Embryophyceae;Embryophyceae_X;Embryophyceae_XX;Oryza;Oryza glaberrima	PF02037||_GAP_	SAP domain||_GAP_						0	20	473
contig_168827_128_1216_+	1521	1089													CAMPEP_0190208060-CAMNT_0033921477	54.36			Micromonas sp. NEPCC29	-311216	Eukaryota	Archaeplastida	93930	359	1	1	1	Eukaryota;Archaeplastida;Chlorophyta;Mamiellophyceae;Mamiellales;Mamiellaceae;Micromonas;Micromonas sp. NEPCC29								0	44	504
contig_168909_95_355_+	355	261	phu:Phum_PHUM475260	FK506-binding protein 7 precursor, putative (EC:5.2.1.8); K09577 FK506-binding protein 14 [EC:5.2.1.8]		K09577	FK506-binding protein 14 [EC:5.2.1.8]		5.2.1.8	E0VW77	KOG0549	FKBP-type peptidyl-prolyl cis-trans isomerase	Posttranslational modification, protein turnover, chaperones	CELLULAR PROCESSES AND SIGNALING	PHUM475260-PA-DS235817PhumU1	63.49	FK506-binding protein 7 precursor, putative	CAM_CRCL_16534	Pediculus humanus	121225	Eukaryota	Archaeplastida	93930	359	0.684	2	2	Eukaryota;Archaeplastida;Glaucocystophyta;Glaucocystophyceae;Glaucocystophytes;Glaucocystophytes_X;Gloeochaete;Gloeochaete witrockiana SAG46_84	_GAP_||PF00254	_GAP_||FKBP-type peptidyl-prolyl cis-trans isomerase						0	17	159
contig_169095_1_413_+	413	413													GRMZM2G071025_P01-1AGPv2	39.39	hypothetical protein LOC100273981 (LOC100273981), mRNA [Source:RefSeq DNA;Acc:NM_001148367]	CAM_CRCL_9260	Zea mays	4577	Eukaryota	Archaeplastida	93930	359	0.6571	14	9	Eukaryota;Archaeplastida;Streptophyta;Embryophyceae;Embryophyceae_X;Embryophyceae_XX;Zea;Zea mays								0	14	43
contig_169211_1_691_+	691	691													BRADI4G11130.1-4Brachy1	41.96		CAM_CRCL_91919	Brachypodium distachyon	15368	Eukaryota	Archaeplastida	93930	359	0.5786	3	3	Eukaryota;Archaeplastida;Streptophyta;Embryophyceae;Embryophyceae_X;Embryophyceae_XX;Brachypodium;Brachypodium distachyon								0	9	515
contig_169338_1095_1991_+	2082	897									KOG0676	Actin and related proteins	Cytoskeleton	CELLULAR PROCESSES AND SIGNALING	GSVIVT01024980001-6IGGP_12x	69.6	Putative uncharacterized protein [Source:UniProtKB/TrEMBL;Acc:A5AL11]	CAM_CRCL_9994	Vitis vinifera	29760	Eukaryota	Archaeplastida	93930	359	0.53	147	78	Eukaryota;Archaeplastida;Streptophyta;Embryophyceae;Embryophyceae_X;Embryophyceae_XX;Populus;Populus trichocarpa	PF00022||PF01290	Actin||Thymosin beta-4 family						0	278	2767
contig_169821_1_253_+	253	253	isc:IscW_ISCW010951	prefoldin, putative; K04798 prefoldin beta subunit		K04798	prefoldin beta subunit			B7Q8B6	KOG3478	Prefoldin subunit 6, KE2 family	Posttranslational modification, protein turnover, chaperones	CELLULAR PROCESSES AND SIGNALING	ISCW010951-PA-DS882582IscaW1	58.57	prefoldin, putative	CAM_CRCL_4005013	Ixodes scapularis	6945	Eukaryota	Archaeplastida	93930	359	0.6201	9	9	Eukaryota;Opisthokonta;Metazoa;Arthropoda;Hexapoda;Insecta;Apis;Apis mellifera	PF01920	Prefoldin subunit						0	14	434
contig_170285_1_402_+	402	402	dan:Dana_GF19382	GF19382 gene product from transcript GF19382-RA						B3MXS4					gi496870468-NZ_GL891472	42.22	metallopeptidase		Capnocytophaga oral taxon 329 str. F0087	706436	Eukaryota	Archaeplastida	93930	359	0.5843	4	4	Eukaryota;Archaeplastida;Streptophyta;Brassicales;Brassicaceae;Camelineae;Arabidopsis;Arabidopsis lyrata								0	5	73
contig_170426_98_391_-	391	294	tet:TTHERM_00688380	Variant SH3 domain containing protein							KOG0032	Ca2+/calmodulin-dependent protein kinase, EF-Hand protein superfamily	Signal transduction mechanisms	CELLULAR PROCESSES AND SIGNALING	CAMPEP_0179002508-CAMNT_0020696227	44.79			Amoebophrya sp.	88552	Eukaryota	Archaeplastida	93930	359	0.7565	3	3	Eukaryota;Archaeplastida;Chlorophyta;Mamiellophyceae;Mamiellales;Mamiellaceae;Mamiellaceae sp;Mamiellaceae RCC2288	PF13405||PF13499||PF00036	EF-hand domain||EF-hand domain pair||EF hand						0	12	69
contig_170770_1_278_+	278	278	adn:Alide_2622	isocitrate dehydrogenase, nADP-dependent (EC:1.1.1.42); K00031 isocitrate dehydrogenase [EC:1.1.1.42]	adn01120||adn00020||adn01100||adn01110||adn00480	K00031	isocitrate dehydrogenase [EC:1.1.1.42]	Citrate cycle (TCA cycle) || Glutathione metabolism || Carbon fixation pathways in prokaryotes || Carbon metabolism || 2-Oxocarboxylic acid metabolism || Biosynthesis of amino acids || Peroxisome	1.1.1.42	E8TSL8					CAMPEP_0117655310-CAMNT_0005461655	77.17			Tetraselmis astigmatica, Strain CCMP880	1074897	Eukaryota	Archaeplastida	93930	359	1	2	1	Eukaryota;Archaeplastida;Chlorophyta;Chlorodendrophyceae;Chlorodendrales;Chlorodendrales_X;Tetraselmis;Tetraselmis astigmatica, Strain CCMP880	PF03971	Monomeric isocitrate dehydrogenase						0	8	46
contig_171167_1_375_-	375	375													CAMPEP_0198722220-CAMNT_0044483115	43.14			Cyanoptycaceae	-283599	Eukaryota	Archaeplastida	93930	359	0.684	4	2	Eukaryota;Archaeplastida;Rhodophyta;Unclassified_Rhodophyta;Unclassified_Rhodophyta_X;Unclassified_Rhodophyta_XX;Coastal Red Alga;Cyanoptycaceae sp.								0	705	15742
contig_171498_1_599_-	599	599	nve:NEMVE_v1g113199	hypothetical protein						A7SCB6					CAMPEP_0198736726-CAMNT_0044500575	28			Cyanoptycaceae	-283599	Eukaryota	Archaeplastida	93930	359	1	1	1	Eukaryota;Archaeplastida;Rhodophyta;Unclassified_Rhodophyta;Unclassified_Rhodophyta_X;Unclassified_Rhodophyta_XX;Coastal Red Alga;Cyanoptycaceae sp.								0	45	135
contig_171817_69_1064_-	1065	996													CAMPEP_0197502258-CAMNT_0043048473	32.55			Prasinophyceae sp. RCC2335	1411624	Eukaryota	Archaeplastida	93930	359	0.7526	5	5	Eukaryota;Archaeplastida;Chlorophyta;Prasinophyceae;Prasinophyceae_X;Prasinophyceae_XX;Prasinophyceae_XXX;Prasinophyceae RCC1871	PF03092||_GAP_	BT1 family||_GAP_			FBT		3	4	44	674
contig_171857_1029_1399_+	1400	371									KOG0331	ATP-dependent RNA helicase	RNA processing and modification	INFORMATION STORAGE AND PROCESSING	CAMPEP_0205968012-CAMNT_0053340835	68.57			Pavlova lutheri, Strain RCC1537	2832	Eukaryota	Archaeplastida	93930	359	0.5976	23	20	Eukaryota;Archaeplastida;Streptophyta;Embryophyceae;Embryophyceae_X;Embryophyceae_XX;Populus;Populus trichocarpa	PF00271||_GAP_	Helicase conserved C-terminal domain||_GAP_						0	9	487
contig_172057_1_508_-	508	508													CAMPEP_0185855468-CAMNT_0028557497	34.03			Erythrolobus madagascarensis, Strain CCMP3276	708628	Eukaryota	Archaeplastida	93930	359	0.7993	5	4	Eukaryota;Archaeplastida;Rhodophyta;Rhodophyceae;Porphyridiales-1;Porphyridiaceae;Erythrolobus;Erythrolobus madagascarensis, Strain CCMP3276	PF13894||PF13465||PF13894||_GAP_	PF13894||PF13465||PF13894||_GAP_						0	6	71
contig_172102_1_302_-	403	302									KOG1947	Leucine rich repeat proteins, some proteins contain F-box	General function prediction only	POORLY CHARACTERIZED	CAMPEP_0206151258-CAMNT_0053548797	47.92			Stichococcus sp, Strain RCC1054	1461547	Eukaryota	Archaeplastida	93930	359	0.776	2	2	Eukaryota;Archaeplastida;Chlorophyta;Trebouxiophyceae;Prasiolales;Prasiolales_X;Stichococcus;Stichococcus sp, Strain RCC1054	PF12937||_GAP_	F-box-like||_GAP_						0	5	284
contig_17223_111_389_-	389	279													CAMPEP_0190215820-CAMNT_0033930191	57.14			Micromonas sp. NEPCC29	-311216	Eukaryota	Archaeplastida	93930	359	0.977	2	2	Eukaryota;Archaeplastida;Chlorophyta;Mamiellophyceae;Mamiellales;Mamiellaceae;Micromonas;Micromonas pusilla CCMP494								1	195	0
contig_172523_39_254_+	254	216	tps:THAPSDRAFT_3693	hypothetical protein		K15223	upstream activation factor subunit UAF30			B8BYH9	KOG1946	RNA polymerase I transcription factor UAF	Transcription	INFORMATION STORAGE AND PROCESSING	CAMPEP_0190223436-CAMNT_0033938353	48.39			Micromonas sp. RCC472	-311215	Eukaryota	Archaeplastida	93930	359	0.7278	17	15	Eukaryota;Archaeplastida;Chlorophyta;Mamiellophyceae;Mamiellales;Mamiellaceae;Micromonas;Micromonas RCC299	PF02201	SWIB/MDM2 domain						0	18	790
contig_172861_1_820_-	820	820	cre:CHLREDRAFT_180184	hypothetical protein						A8JH22	KOG2712	Transcriptional coactivator	Transcription	INFORMATION STORAGE AND PROCESSING	CAMPEP_0202897880-CAMNT_0049583645	46.85			Chlamydomonas chlamydogama, Strain SAG 11-48b	225041	Eukaryota	Archaeplastida	93930	359	0.8126	4	4	Eukaryota;Archaeplastida;Chlorophyta;Chlorophyceae;Chlorophyceae_X;CW-Chlamydomonadales;Chlamydomonas;Chlamydomonas chlamydogama, Strain SAG 11-48b	_GAP_||PF02229	_GAP_||Transcriptional Coactivator p15 (PC4)						0	3	49
contig_172923_1_735_-	735	735	ter:Tery_4979	WD-40 repeat-containing protein						Q10V31					Tery_4979-NC_008312	21.26	WD-40 repeat-containing protein	CAM_CRCL_4017576	Trichodesmium erythraeum IMS101	203124	Eukaryota	Archaeplastida	93930	359	0.523	2	2	Eukaryota;Archaeplastida;Chlorophyta;Trebouxiophyceae;Prasiolales;Prasiolales_X;Stichococcus;Stichococcus sp, Strain RCC1054								0	0	138
contig_173963_1_1104_+	6053	1104													PICST_31454-pic2943	19.94	HYR10; hyphally-regulated cell wall protein		Scheffersomyces stipitis CBS 6054	322104	Eukaryota	Archaeplastida	93930	359	0.684	2	2	Eukaryota;Archaeplastida;Chlorophyta;Mamiellophyceae;Mamiellales;Bathycoccaceae;Bathycoccus;Bathycoccus prasinos CCMP1898								0	91	101
contig_174056_1011_1292_-	1576	282													CAMPEP_0198312230-CAMNT_0044015165	37.36			Madagascaria erythrocladioides	753684	Eukaryota	Archaeplastida	93930	359	1	1	1	Eukaryota;Archaeplastida;Rhodophyta;Compsopogonophyceae;Erythropeltidales;Erythrotrichiaceae;Madagascaria;Madagascaria erythrocladioides								0	28	120
contig_174153_1028_1225_-	3887	198													CAMPEP_0203026392-CAMNT_0049768591	73.44			Micromonas pusilla RCC1614	-311175	Eukaryota	Archaeplastida	93930	359	1	1	1	Eukaryota;Archaeplastida;Chlorophyta;Mamiellophyceae;Mamiellales;Mamiellaceae;Micromonas;Micromonas pusilla RCC1614								0	18	77
contig_174528_138_1079_+	2101	942													GSVIVT01028271001-7IGGP_12x	30.27	Whole genome shotgun sequence of line PN40024, scaffold_5.assembly12x [Source:UniProtKB/TrEMBL;Acc:D7U2V9]	CAM_CRCL_4065633	Vitis vinifera	29760	Eukaryota	Archaeplastida	93930	359	0.8694	4	4	Eukaryota;Archaeplastida;Streptophyta;Embryophyceae;Embryophyceae_X;Embryophyceae_XX;Populus;Populus trichocarpa	_GAP_||PF14566||_GAP_	_GAP_||PF14566||_GAP_						0	170	329
contig_174541_1_827_-	827	827	lbz:LbrM15_V2.0460	hypothetical protein						A4H816					CAMPEP_0182859314-CAMNT_0024990897	32.77			Nephroselmis pyriformis, Strain CCMP717	156128	Eukaryota	Archaeplastida	93930	359	1	1	1	Eukaryota;Archaeplastida;Chlorophyta;Nephroselmidophyceae;Nephroselmidophyceae_X;Nephroselmidaceae;Nephroselmis;Nephroselmis pyriformis, Strain CCMP717								0	38	243
contig_17465_1_488_-	488	488	gfo:GFO_3465	hypothetical protein						A0M709					ORF0141-A160P2DRAFT_NODE	51.65	IMG gene_oid=2236294600		Flavobacterium SCGC AAA160-P02	1009412	Eukaryota	Archaeplastida	93930	359	0.523	2	2	Eukaryota;Archaeplastida;Chlorophyta;Prasino-Clade-V;Prasino-Clade-V_X;Pycnococcaceae;Pycnococcus;Pycnococcus provasolii RCC931								0	302	10
contig_174919_392_496_+	593	105	tad:TRIADDRAFT_21648	hypothetical protein ; K09578 peptidyl-prolyl cis-trans isomerase NIMA-interacting 1 [EC:5.2.1.8]		K09578	peptidyl-prolyl cis-trans isomerase NIMA-interacting 1 [EC:5.2.1.8]	RIG-I-like receptor signaling pathway	5.2.1.8	B3RP35	KOG3259	Peptidyl-prolyl cis-trans isomerase	Posttranslational modification, protein turnover, chaperones	CELLULAR PROCESSES AND SIGNALING	TriadP21648-scaffold_2TRIAD1	84.38	Putative uncharacterized protein [Source:UniProtKB/TrEMBL;Acc:B3RP35]	CAM_CRCL_13206	Trichoplax adhaerens	10228	Eukaryota	Archaeplastida	93930	359	0.684	2	2	Eukaryota;Archaeplastida;Chlorophyta;Trebouxiophyceae;Trebouxiophyceae_X;Trebouxiophyceae_XX;Coccomyxa;Coccomyxa subellipsoidea	PF00639	PPIC-type PPIASE domain						0	1	82
contig_175331_1_775_-	1920	775	vma:VAB18032_22370	glycosyl hydrolase BNR repeat-containing protein											CAMPEP_0198360286-CAMNT_0044067273	68.22			Madagascaria erythrocladioides	753684	Eukaryota	Archaeplastida	93930	359	0.523	2	2	Eukaryota;Archaeplastida;Rhodophyta;Compsopogonophyceae;Erythropeltidales;Erythrotrichiaceae;Madagascaria;Madagascaria erythrocladioides								0	118	42
contig_175331_814_1782_-	1920	969	gau:GAU_3117	hypothetical protein						C1ACD2					CAMPEP_0198360286-CAMNT_0044067273	72.73			Madagascaria erythrocladioides	753684	Eukaryota	Archaeplastida	93930	359	0.523	2	2	Eukaryota;Archaeplastida;Rhodophyta;Compsopogonophyceae;Erythropeltidales;Erythrotrichiaceae;Madagascaria;Madagascaria erythrocladioides	_GAP_||PF02012||_GAP_	_GAP_||BNR/Asp-box repeat||_GAP_						0	181	36
contig_175404_1_1007_+	1163	1007													CAMPEP_0170150804-CAMNT_0010387863	35.58			Dolichomastix tenuilepis	195969	Eukaryota	Archaeplastida	93930	359	1	1	1	Eukaryota;Archaeplastida;Chlorophyta;Mamiellophyceae;Dolichomastigales;Dolichomastigaceae;Dolichomastix;Dolichomastix tenuilepis	_GAP_||PF00754	_GAP_||F5/8 type C domain						0	58	234
contig_175471_1_444_+	849	444	ppp:PHYPADRAFT_136788	hypothetical protein						A9SX45	KOG0032	Ca2+/calmodulin-dependent protein kinase, EF-Hand protein superfamily	Signal transduction mechanisms	CELLULAR PROCESSES AND SIGNALING	CAMPEP_0181350810-CAMNT_0023463297	36.73			Mantoniella antarctica, Strain SL-175	81844	Eukaryota	Archaeplastida	93930	359	1	1	1	Eukaryota;Archaeplastida;Chlorophyta;Mamiellophyceae;Mamiellales;Mamiellaceae;Mantoniella;Mantoniella antarctica, Strain SL-175	_GAP_||PF13405||PF00036	_GAP_||EF-hand domain||EF hand						0	62	525
contig_175471_466_606_+	849	141													CAMPEP_0181350810-CAMNT_0023463297	53.49			Mantoniella antarctica, Strain SL-175	81844	Eukaryota	Archaeplastida	93930	359	0.9507	2	2	Eukaryota;Archaeplastida;Chlorophyta;Mamiellophyceae;Mamiellales;Mamiellaceae;Mamiellaceae sp;Mamiellaceae RCC2288								0	54	391
contig_175527_1_211_-	211	211	ppp:PHYPADRAFT_164347	hypothetical protein						A9SDJ0					ORF166056-Lotgi1	32.79	hypothetical protein	CAM_CRCL_4137056	Lottia gigantea	225164	Eukaryota	Archaeplastida	93930	359	0.684	2	2	Eukaryota;Archaeplastida;Streptophyta;Embryophyceae;Embryophyceae_X;Embryophyceae_XX;Physcomitrella;Physcomitrella patens								0	5	45
contig_175647_167_442_+	525	276	vcn:VOLCADRAFT_91012	hypothetical protein											jgi_91012_7112.m000178-Volca1	31.82	hypothetical protein	CAM_CRCL_9260	Volvox carteri	3067	Eukaryota	Archaeplastida	93930	359	1	1	1	Eukaryota;Archaeplastida;Chlorophyta;Chlorophyceae;Chlorophyceae_X;CW-Chlamydomonadales;Volvox;Volvox carteri								0	25	38
contig_175787_165_722_-	1459	558													CAMPEP_0190740264-CAMNT_0034564283	68.13			Picocystis salinarum CCMP1897	88271	Eukaryota	Archaeplastida	93930	359	0.7846	7	6	Eukaryota;Archaeplastida;Chlorophyta;Mamiellophyceae;Mamiellales;Mamiellaceae;Micromonas;Micromonas pusilla RCC2306	PF09418	Protein of unknown function (DUF2009)						0	11	192
contig_175787_980_1458_-	1459	479													CAMPEP_0206095734-CAMNT_0053478259	50.32			Unidentified sp, Strain CCMP2175	1461546	Eukaryota	Archaeplastida	93930	359	0.9693	3	3	Eukaryota;Archaeplastida;Chlorophyta;Prasinophyceae;Prasinophyceae_X;Prasinophyceae_XX;Prasinophyceae_XXX;Prasinophyceae CCMP2111	PF09418	Protein of unknown function (DUF2009)						0	21	130
contig_175970_1_1044_+	1128	1044													jgi_75424_26.m000533-MicpuN2	47.1	hypothetical protein	CAM_CRCL_32327116	Micromonas RCC299	296587	Eukaryota	Archaeplastida	93930	359	0.684	2	2	Eukaryota;Archaeplastida;Chlorophyta;Mamiellophyceae;Mamiellales;Mamiellaceae;Micromonas;Micromonas RCC299	_GAP_||PF13540||_GAP_	_GAP_||PF13540||_GAP_						0	49	632
contig_176198_1097_1249_+	1252	153	vcn:VOLCADRAFT_74092	hypothetical protein; K00830 alanine-glyoxylate transaminase / serine-glyoxylate transaminase / serine-pyruvate transaminase [EC:2.6.1.44 2.6.1.45 2.6.1.51]							KOG2862	Alanine-glyoxylate aminotransferase AGT1	General function prediction only	POORLY CHARACTERIZED	CAMPEP_0206074644-CAMNT_0053453363	64.58			Unidentified, Strain CCMP1205	44458	Eukaryota	Archaeplastida	93930	359	0.7955	5	5	Eukaryota;Archaeplastida;Chlorophyta;Prasinophyceae;Prasinophyceae_X;Prasinophyceae_XX;Prasinophyceae_XXX;Unidentified sp, Strain CCMP2175								0	16	109
contig_176248_1_613_+	684	613									KOG2650	Zinc carboxypeptidase	Function unknown	POORLY CHARACTERIZED	CAMPEP_0197866748-CAMNT_0043485337	45.25			Pterosperma, Strain CCMP1384	1461541	Eukaryota	Archaeplastida	93930	359	1	1	1	Eukaryota;Archaeplastida;Chlorophyta;Pyramimonadales;Pyramimonadales_X;Pyramimonadales_XX;Pterosperma;Pterosperma, Strain CCMP1384	PF00246||_GAP_	Zinc carboxypeptidase||_GAP_						0	67	1771
contig_176321_1_495_+	837	495									KOG3017	Defense-related protein containing SCP domain	Function unknown	POORLY CHARACTERIZED	CAMPEP_0198234218-CAMNT_0043914961	44.2			Prasinophyceae CCMP2111	1461542	Eukaryota	Archaeplastida	93930	359	0.4636	3	3	Eukaryota;Archaeplastida;Chlorophyta;Prasinophyceae;Prasinophyceae_X;Prasinophyceae_XX;Prasinophyceae_XXX;Prasinophyceae CCMP2111	PF00188	Cysteine-rich secretory protein family						0	49	3965
contig_177072_1_566_+	629	566	bba:Bd2810	yqaB; putative phosphatase						Q6MJG7					CAMPEP_0184976570-CAMNT_0027499471	39.36			Spumella elongata, Strain CCAP 955	89044	Eukaryota	Archaeplastida	93930	359	0.686	9	9	Eukaryota;Archaeplastida;Chlorophyta;Mamiellophyceae;Mamiellales;Mamiellaceae;Micromonas;Micromonas pusilla CCMP494	PF13419	PF13419	_GAP_||TIGR01509	_GAP_||HAD hydrolase, family IA, variant 3				0	27	59
contig_177371_971_1336_+	1517	366													jgi_100477_26.m000094-MicpuN2	33.33	hypothetical protein	CAM_CRCL_27420731	Micromonas RCC299	296587	Eukaryota	Archaeplastida	93930	359	1	1	1	Eukaryota;Archaeplastida;Chlorophyta;Mamiellophyceae;Mamiellales;Mamiellaceae;Micromonas;Micromonas RCC299								1	18	222
contig_177392_359_607_-	1080	249													CAMPEP_0183795284-CAMNT_0026039695	48.15			Crustomastix stigmata, Strain CCMP3273	195967	Eukaryota	Archaeplastida	93930	359	1	1	1	Eukaryota;Archaeplastida;Chlorophyta;Mamiellophyceae;Dolichomastigales;Crustomastigaceae;Crustomastix;Crustomastix stigmata, Strain CCMP3273								0	6	59
contig_177629_1_484_+	484	484													CAMPEP_0198642322-CAMNT_0044377681	27.91			Phaeocystis cordata	118079	Eukaryota	Archaeplastida	93930	359	0.7721	4	4	Eukaryota;Archaeplastida;Chlorophyta;Prasinophyceae;Prasinophyceae_X;Prasinophyceae_XX;Prasinophyceae_XXX;Prasinophyceae RCC701								0	87	505
contig_178472_153_578_+	707	426	pmx:PERMA_0372	ankyrin domain protein						C0QTZ9					Ftrac_1301-NC_014759	34.68	ankyrin	CAM_CRCL_4045979	Marivirga tractuosa DSM 4126	643867	Eukaryota	Archaeplastida	93930	359	0.4599	5	5	Eukaryota;Archaeplastida;Chlorophyta;Pyramimonadales;Pyramimonadales_X;Pyramimonadales_XX;Pyramimonas;Pyramimonas parkeae	PF12796||_GAP_	PF12796||_GAP_						0	14	95
contig_179622_2165_2359_+	2361	195													CAMPEP_0179015958-CAMNT_0020711625	57.14			Pyrodinium bahamense	73915	Eukaryota	Archaeplastida	93930	359	0.8552	5	4	Eukaryota;Archaeplastida;Chlorophyta;Mamiellophyceae;Mamiellales;Bathycoccaceae;Bathycoccus;Bathycoccus prasinos BCC99000								0	4	67
contig_179696_1_388_-	919	388													CAMPEP_0198239474-CAMNT_0043922063	46.4			Prasinophyceae CCMP2111	1461542	Eukaryota	Archaeplastida	93930	359	0.8373	2	2	Eukaryota;Archaeplastida;Chlorophyta;Mamiellophyceae;Dolichomastigales;Dolichomastigaceae;Dolichomastix;Dolichomastix tenuilepis								0	0	69
contig_179700_1_225_+	225	225													Sput200_3690-NC_017566	33.33	Membrane protein		Shewanella putrefaciens 200	399804	Eukaryota	Archaeplastida	93930	359	0.523	2	2	Eukaryota;Archaeplastida;Rhodophyta;Rhodellophyceae;Rhodellales;Rhodellales_X;Rhodella;Rhodella maculata CCMP736								0	0	65
contig_180197_1_691_-	691	691	mar:MAE_61060	hyalin repeat-containing protein						B0JK74					MAE_61060-NC_010296	24.22	hyalin repeat-containing protein	CAM_CRCL_4031166	Microcystis aeruginosa NIES-843	449447	Eukaryota	Archaeplastida	93930	359	0.525	3	3	Eukaryota;Archaeplastida;Chlorophyta;Mamiellophyceae;Dolichomastigales;Crustomastigaceae;Crustomastix;Crustomastix stigmata, Strain CCMP3273								0	1	86
contig_180440_585_945_+	945	361									KOG1376	Alpha tubulin	Cytoskeleton	CELLULAR PROCESSES AND SIGNALING	CAMPEP_0168607764-CAMNT_0008647647	99.16			Strombidium rassoulzadegani, Strain ras09	1082188	Eukaryota	Archaeplastida	93930	359	0.5622	123	62	Eukaryota;Archaeplastida;Streptophyta;Embryophyceae;Embryophyceae_X;Embryophyceae_XX;Zea;Zea mays	PF03953	Tubulin C-terminal domain						0	55	2910
contig_181049_978_1271_+	1272	294													CAMPEP_0203021514-CAMNT_0049763283	48.05			Micromonas pusilla RCC1614	-311175	Eukaryota	Archaeplastida	93930	359	1	1	1	Eukaryota;Archaeplastida;Chlorophyta;Mamiellophyceae;Mamiellales;Mamiellaceae;Micromonas;Micromonas pusilla RCC1614								0	28	31
contig_181131_82_930_-	1138	849	phu:Phum_PHUM446350	krueppel c2h2-type zinc finger protein, putative; K09228 KRAB domain-containing zinc finger protein		K09228	KRAB domain-containing zinc finger protein			E0VU67					PHUM446350-PA-DS235780PhumU1	31.95	krueppel c2h2-type zinc finger protein,putative	CAM_CRCL_1433	Pediculus humanus	121225	Eukaryota	Archaeplastida	93930	359	0.684	4	3	Eukaryota;Archaeplastida;Streptophyta;Embryophyceae;Embryophyceae_X;Embryophyceae_XX;Populus;Populus trichocarpa	_GAP_||PF00096||_GAP_	_GAP_||Zinc finger, C2H2 type||_GAP_						0	16	472
contig_181467_1465_1725_+	2652	261	dan:Dana_GF11472	GF11472 gene product from transcript GF11472-RA						B3MCS7					AAEL001886-PA-supercont145	35.82	zinc finger protein, putative	CAM_CRCL_1433	Phytophthora infestans	4787	Eukaryota	Archaeplastida	93930	359	0.684	2	2	Eukaryota;Archaeplastida;Chlorophyta;Pyramimonadales;Pyramimonadales_X;Pyramimonadales_XX;Pyramimonas;Pyramimonas obovata CCMP722								0	4	67
contig_181566_254_901_+	953	648	ppp:PHYPADRAFT_154846	hypothetical protein						A9U2K6					Sb08g001200.1-8Sbi1	44.44	Putative uncharacterized protein Sb08g001200 [source:UniProtKB/TrEMBL;Acc:C5YQJ2_SORBI]	CAM_CRCL_4077316	Sorghum bicolor	4558	Eukaryota	Archaeplastida	93930	359	0.6716	8	4	Eukaryota;Archaeplastida;Streptophyta;Embryophyceae;Embryophyceae_X;Embryophyceae_XX;Physcomitrella;Physcomitrella patens	_GAP_||PF13499	_GAP_||EF-hand domain pair						0	7	118
contig_181672_1_1011_-	1012	1011	aor:AOR_1_454184 || afv:AFLA_051840	AO090009000281; tubulin alpha-1 chain; K07375 tubulin beta || tubulin beta subunit; K07375 tubulin beta	afv04145||aor04145	K07375	tubulin beta	Phagosome || Gap junction || Pathogenic Escherichia coli infection		B8NSZ1||Q2UUK4	KOG1375	Beta tubulin	Cytoskeleton	CELLULAR PROCESSES AND SIGNALING	CBQ70096-19GCA_000230245	52.58	probable tubulin beta chain		Sporisorium reilianum SRZ2	999809	Eukaryota	Archaeplastida	93930	359	0.5211	39	29	Eukaryota;Archaeplastida;Streptophyta;Embryophyceae;Embryophyceae_X;Embryophyceae_XX;Brachypodium;Brachypodium distachyon	_GAP_||PF00091	_GAP_||Tubulin/FtsZ family, GTPase domain						0	18	145
contig_181732_2055_2735_+	2737	681	cak:Caul_2562	hypothetical protein						B0SXA4					CAMPEP_0118957302-CAMNT_0006905367	25.12			Pyramimonas obovata CCMP722	-311159	Eukaryota	Archaeplastida	93930	359	0.774	3	3	Eukaryota;Archaeplastida;Chlorophyta;Pyramimonadales;Pyramimonadales_X;Pyramimonadales_XX;Pyramimonas;Pyramimonas obovata CCMP722								0	2	140
contig_181953_117_821_-	821	705													CAMPEP_0179721338-CAMNT_0021595283	24.76			Ostreococcus mediterraneus clade-D-RCC1107	-311165	Eukaryota	Archaeplastida	93930	359	0.6042	12	12	Eukaryota;Archaeplastida;Chlorophyta;Mamiellophyceae;Mamiellales;Bathycoccaceae;Ostreococcus;Ostreococcus mediterraneus clade-D-RCC1107								0	23	113
contig_182235_90_443_+	1190	354													BRADI3G20460.1-3Brachy1	27.07		CAM_CRCL_3067	Brachypodium distachyon	15368	Eukaryota	Archaeplastida	93930	359	1	1	1	Eukaryota;Archaeplastida;Streptophyta;Embryophyceae;Embryophyceae_X;Embryophyceae_XX;Brachypodium;Brachypodium distachyon								0	12	127
contig_183061_1_710_+	710	710													DappuP306491-scaffold_5Dappu1	47.73		CAM_CRCL_19018	Daphnia pulex	6669	Eukaryota	Archaeplastida	93930	359	0.684	2	2	Eukaryota;Archaeplastida;Streptophyta;Embryophyceae;Embryophyceae_X;Embryophyceae_XX;Populus;Populus trichocarpa								0	17	55
contig_183163_1_1164_+	1445	1164	dme:Dmel_CG18290 || dpo:Dpse_GA14877 || dan:Dana_GF17602 || der:Dere_GG19688 || dsi:Dsim_GD18909 || dwi:Dwil_GK13943 || dya:Dyak_GE26273 || dgr:Dgri_GH19045 || dmo:Dmoj_GI24339 || dvi:Dvir_GJ10425	Act87E; Actin 87E; K05692 actin beta/gamma 1 || GA14877 gene product from transcript GA14877-RA; K05692 actin beta/gamma 1 || GF17602 gene product from transcript GF17602-RA; K05692 actin beta/gamma 1 || GG19688 gene product from transcript GG19688-RA; K05692 actin beta/gamma 1 || GD18909 gene product from transcript GD18909-RA; K05692 actin beta/gamma 1 || GK13943 gene product from transcript GK…	dme04745||dsi04145||der04145||dan04145||dvi04745||dpo04145||dya04745||dvi04145||der04745||dmo04745||dwi04145||dsi04745||dgr04745||dya04145||dan04745||dpo04745||dmo04145||dwi04745||dme04145||dgr04145	K05692	actin beta/gamma 1	Rap1 signaling pathway || Phagosome || Hippo signaling pathway || Hippo signaling pathway - fly || Focal adhesion || Adherens junction || Tight junction || Platelet activation || Leukocyte transendothelial migration || Phototransduction - fly || Regulation of actin cytoskeleton || Thyroid hormone signaling pathway || Oxytocin signaling pathway || Bacterial invasion of epithelial cells || Vibrio c…		B3P451||B4NKE1||B4PQF0||P10981||B4R189||B3LX89||B4KAA1||Q297Q8||B4JI79||Q71RP6	KOG0676	Actin and related proteins	Cytoskeleton	CELLULAR PROCESSES AND SIGNALING	CAMPEP_0197020830-CAMNT_0042448533	84.98			Ammonia sp.	-289857	Eukaryota	Archaeplastida	93930	359	0.5532	57	46	Eukaryota;Archaeplastida;Streptophyta;Embryophyceae;Embryophyceae_X;Embryophyceae_XX;Zea;Zea mays	PF00022||_GAP_	Actin||_GAP_						0	21	377
contig_183218_60_550_+	550	491													CAMPEP_0184751984-CAMNT_0027231295	29.66			Rhodosorus marinus UTEX LB2760	-311208	Eukaryota	Archaeplastida	93930	359	0.523	2	2	Eukaryota;Archaeplastida;Rhodophyta;Stylonematophyceae;Porphyridiales-2;Stylonematales-Group-II;Rhodosorus;Rhodosorus marinus UTEX LB2760								0	8	69
contig_183223_1_250_+	250	250	nve:NEMVE_v1g144162	hypothetical protein						A7T3B5					CAMPEP_0181246278-CAMNT_0023343101	30.51			Haptolina ericina	156174	Eukaryota	Archaeplastida	93930	359	0.5786	3	3	Eukaryota;Archaeplastida;Chlorophyta;Pyramimonadales;Pyramimonadales_X;Pyramimonadales_XX;Pyramimonas;Pyramimonas, Strain CCMP2087								0	11	45
contig_183265_1_464_+	693	464	vcn:VOLCADRAFT_80056	hstH2A-11; histone H2A							KOG1756	Histone 2A	Chromatin structure and dynamics	INFORMATION STORAGE AND PROCESSING	CAMPEP_0199158342-CAMNT_0044882433	78.26			Vaucheria litorea, Strain CCMP2940	109269	Eukaryota	Archaeplastida	93930	359	0.5837	36	21	Eukaryota;Stramenopiles;Stramenopiles_X;Oomyceta;Oomyceta_X;Oomyceta_XX;Phytophthora;Phytophthora infestans	_GAP_||PF00125||_GAP_	_GAP_||Core histone H2A/H2B/H3/H4||_GAP_						0	13	163
contig_183927_316_566_+	566	251	nve:NEMVE_v1g234225	hypothetical protein ; K11188 peroxiredoxin 6, 1-Cys peroxiredoxin [EC:1.11.1.7 1.11.1.15 3.1.1.-]	nve00360||nve01100	K11188	peroxiredoxin 6, 1-Cys peroxiredoxin [EC:1.11.1.7 1.11.1.15 3.1.1.-]	Phenylalanine metabolism || Phenylpropanoid biosynthesis	1.11.1.7||1.11.1.15	A7RMT9	KOG0854	Alkyl hydroperoxide reductase, thiol specific antioxidant and related enzymes	Posttranslational modification, protein turnover, chaperones	CELLULAR PROCESSES AND SIGNALING	NEMVEDRAFT_v1g234225-PA-scaffold_15Nemve1	80.25	Predicted protein [Source:UniProtKB/TrEMBL;Acc:A7RMT9]	CAM_CRCL_1314	Nematostella vectensis	45351	Eukaryota	Archaeplastida	93930	359	0.6208	5	4	Eukaryota;Archaeplastida;Chlorophyta;Chlorodendrophyceae;Chlorodendrales;Chlorodendrales_X;Tetraselmis;Tetraselmis chuii, Strain PLY429	_GAP_||PF10417	_GAP_||C-terminal domain of 1-Cys peroxiredoxin						0	12	124
contig_184295_1_357_+	528	357													CAMPEP_0196586856-CAMNT_0041908869	34.34			Pyramimonas amylifera, Strain CCMP720	-283589	Eukaryota	Archaeplastida	93930	359	0.684	2	2	Eukaryota;Archaeplastida;Chlorophyta;Pyramimonadales;Pyramimonadales_X;Pyramimonadales_XX;Pyramimonas;Pyramimonas amylifera, Strain CCMP720								0	25	49
contig_184392_797_1189_-	2731	393													ANH9381_0781-NC_016513	60.34	hypothetical protein		Aggregatibacter actinomycetemcomitans ANH9381	754507	Eukaryota	Archaeplastida	93930	359	0.523	2	2	Eukaryota;Archaeplastida;Chlorophyta;Mamiellophyceae;Mamiellales;Mamiellaceae;Micromonas;Micromonas sp. RCC472								0	3	144
contig_184588_1217_1840_-	3953	624													ORF34364-OstRCC809_2	32.43		CAM_CRCL_21984264	Ostreococcus RCC809	385169	Eukaryota	Archaeplastida	93930	359	1	1	1	Eukaryota;Archaeplastida;Chlorophyta;Mamiellophyceae;Mamiellales;Bathycoccaceae;Ostreococcus;Ostreococcus RCC809								0	4	135
contig_184715_174_497_+	497	324													CAMPEP_0191529782-CAMNT_0035535969	38.1			Rhodella maculata CCMP736	38298	Eukaryota	Archaeplastida	93930	359	1	1	1	Eukaryota;Archaeplastida;Rhodophyta;Rhodellophyceae;Rhodellales;Rhodellales_X;Rhodella;Rhodella maculata CCMP736								0	2	51
contig_184828_48_815_+	828	768													CAMPEP_0172291864-CAMNT_0013000663	27.04			Cyclotella meneghiniana	29205	Eukaryota	Archaeplastida	93930	359	0.6725	8	7	Eukaryota;Archaeplastida;Chlorophyta;Mamiellophyceae;Mamiellales;Bathycoccaceae;Bathycoccus;Bathycoccus prasinos BCC99000								0	1	247
contig_184880_1_899_+	899	899	phu:Phum_PHUM248490	hypothetical protein						E0VJP0					PHUM248490-PA-DS235226PhumU1	34.34	conserved hypothetical protein	CAM_CRCL_6052480	Pediculus humanus	121225	Eukaryota	Archaeplastida	93930	359	0.684	2	2	Eukaryota;Archaeplastida;Streptophyta;Brassicales;Brassicaceae;Camelineae;Arabidopsis;Arabidopsis thaliana								0	2	100
contig_185144_1_699_+	699	699													CAMPEP_0118931094-CAMNT_0006873553	29.36			Pyramimonas obovata CCMP722	-311159	Eukaryota	Archaeplastida	93930	359	1	1	1	Eukaryota;Archaeplastida;Chlorophyta;Pyramimonadales;Pyramimonadales_X;Pyramimonadales_XX;Pyramimonas;Pyramimonas obovata CCMP722	PF12796||_GAP_	PF12796||_GAP_						0	6	123
contig_186114_1_918_-	918	918													CAMPEP_0197469726-CAMNT_0043005963	32.43			Prasinophyceae sp. RCC998	464263	Eukaryota	Archaeplastida	93930	359	0.8373	2	2	Eukaryota;Archaeplastida;Chlorophyta;Prasinophyceae;unclassified Prasinophyceae;unclassified Prasinophyceae_X;unclassified Prasinophyceae_XX;Prasinophyceae sp. RCC998								0	18	412
contig_186146_1_949_-	1296	949													AT1G26240.1-1TAIR10	40	Proline-rich extensin-like family protein.[Source:TAIR;Acc:AT1G26240]	CAM_CRCL_14106	Arabidopsis thaliana	3702	Eukaryota	Archaeplastida	93930	359	1	1	1	Eukaryota;Archaeplastida;Streptophyta;Brassicales;Brassicaceae;Camelineae;Arabidopsis;Arabidopsis thaliana								0	3	253
contig_186205_1_420_-	420	420	pti:PHATRDRAFT_50519	hypothetical protein						B7GEC8					jgi_56966_4.m000571-MicpuC2	50	hypothetical protein	CAM_CRCL_4082693	Micromonas pusilla CCMP1545	564608	Eukaryota	Archaeplastida	93930	359	0.8085	5	3	Eukaryota;Archaeplastida;Chlorophyta;Mamiellophyceae;Mamiellales;Mamiellaceae;Micromonas;Micromonas pusilla CCMP1545	_GAP_||PF03382	_GAP_||Mycoplasma protein of unknown function, DUF285	_GAP_||TIGR02167	_GAP_||bacterial surface protein 26-residue repeat				0	2	168
contig_186760_1_507_-	507	507	tps:THAPSDRAFT_23259	hypothetical protein						B8C4E6	KOG3704	Heparan sulfate D-glucosaminyl 3-O-sulfotransferase	Posttranslational modification, protein turnover, chaperones	CELLULAR PROCESSES AND SIGNALING	CAMPEP_0206080156-CAMNT_0053459645	48.54			Unidentified, Strain CCMP1205	44458	Eukaryota	Archaeplastida	93930	359	0.977	2	2	Eukaryota;Archaeplastida;Chlorophyta;Prasinophyceae;Prasinophyceae_X;Prasinophyceae_XX;Prasinophyceae_XXX;Unidentified sp, Strain CCMP2175	PF00685	Sulfotransferase domain						0	1	84
contig_186970_346_780_-	780	435	olu:OSTLU_48622	hypothetical protein						A4RSP6	KOG3071	Fatty acyl-CoA elongase/Polyunsaturated fatty acid specific elongation enzyme	Lipid transport and metabolism	METABOLISM	CAMPEP_0119169556-CAMNT_0007163167	81.25			Prasinoderma singularis, Strain RCC927	676789	Eukaryota	Archaeplastida	93930	359	0.977	2	2	Eukaryota;Archaeplastida;Chlorophyta;Prasinococcales;Prasinococcales_X;Prasinococcales-Clade-B;Prasinoderma;Prasinoderma coloniale, Strain CCMP1413	PF01151	GNS1/SUR4 family						3	0	229
contig_187035_1102_1510_+	1511	409									KOG0619	FOG: Leucine rich repeat	General function prediction only	POORLY CHARACTERIZED	Sb05g024090.1-5Sbi1	46.43	Putative uncharacterized protein RLK1Putative uncharacterized protein Sb05g024090 [source:UniProtKB/TrEMBL;Acc:Q9XGG1_SORBI]	CAM_CRCL_13673	Sorghum bicolor	4558	Eukaryota	Archaeplastida	93930	359	0.935	9	5	Eukaryota;Archaeplastida;Streptophyta;Embryophyceae;Embryophyceae_X;Embryophyceae_XX;Oryza;Oryza sativa Indica Group	PF13504||_GAP_	Leucine rich repeat||_GAP_						0	1	201
contig_187079_1_973_+	1075	973	vcn:VOLCADRAFT_42798	hypothetical protein							KOG1987	Speckle-type POZ protein SPOP and related proteins with TRAF, MATH and BTB/POZ domains	Cell cycle control, cell division, chromosome partitioning	CELLULAR PROCESSES AND SIGNALING	e_gw1.8.175.1-C169_V2_scaffold_8	33.89		CAM_CRCL_55546	Coccomyxa subellipsoidea	248742	Eukaryota	Archaeplastida	93930	359	1	1	1	Eukaryota;Archaeplastida;Chlorophyta;Trebouxiophyceae;Trebouxiophyceae_X;Trebouxiophyceae_XX;Coccomyxa;Coccomyxa subellipsoidea	_GAP_||PF00651||_GAP_	_GAP_||BTB/POZ domain||_GAP_						0	1	559
contig_187152_1_487_-	858	487													CAMPEP_0170166384-CAMNT_0010404037	32.04			Dolichomastix tenuilepis	195969	Eukaryota	Archaeplastida	93930	359	1	1	1	Eukaryota;Archaeplastida;Chlorophyta;Mamiellophyceae;Dolichomastigales;Dolichomastigaceae;Dolichomastix;Dolichomastix tenuilepis								0	0	155
contig_187300_1101_2006_+	3050	906	tro:trd_A0398	hypothetical protein						B9L3N4					ORF31045-OstRCC809_2	24.76		CAM_CRCL_6036907	Ostreococcus RCC809	385169	Eukaryota	Archaeplastida	93930	359	1	1	1	Eukaryota;Archaeplastida;Chlorophyta;Mamiellophyceae;Mamiellales;Bathycoccaceae;Ostreococcus;Ostreococcus RCC809								0	0	131
contig_187425_909_1913_-	2137	1005													Sb03g046350.1-3Sbi1	43.88	Putative uncharacterized protein Sb03g046350 [source:UniProtKB/TrEMBL;Acc:C5XIJ5_SORBI]	CAM_CRCL_23496	Sorghum bicolor	4558	Eukaryota	Archaeplastida	93930	359	1	1	1	Eukaryota;Archaeplastida;Streptophyta;Embryophyceae;Embryophyceae_X;Embryophyceae_XX;Sorghum;Sorghum bicolor	PF13516||PF00560||_GAP_	PF13516||Leucine Rich Repeat||_GAP_						0	10	1537
contig_187455_1030_1252_+	1253	223													CAMPEP_0203019438-CAMNT_0049761195	39.73			Micromonas pusilla CCAC1681	-311174	Eukaryota	Archaeplastida	93930	359	0.977	2	2	Eukaryota;Archaeplastida;Chlorophyta;Mamiellophyceae;Mamiellales;Mamiellaceae;Micromonas;Micromonas pusilla CCAC1681								0	2	70
contig_187727_20_637_-	912	618	lbz:LbrM26_V2.0520	hypothetical protein						A4HEQ6					CAMPEP_0198245220-CAMNT_0043929369	32.04			Prasinophyceae CCMP2111	1461542	Eukaryota	Archaeplastida	93930	359	1	1	1	Eukaryota;Archaeplastida;Chlorophyta;Prasinophyceae;Prasinophyceae_X;Prasinophyceae_XX;Prasinophyceae_XXX;Prasinophyceae CCMP2111								0	0	50
contig_187916_1_366_+	366	366													RCOM_1270600-rcu906	30.77	hypothetical protein		Ricinus communis	3988	Eukaryota	Archaeplastida	93930	359	0.684	2	2	Eukaryota;Archaeplastida;Streptophyta;Embryophyceae;Embryophyceae_X;Embryophyceae_XX;Ricinus;Ricinus communis	_GAP_||PF12756	_GAP_||PF12756						0	0	80
contig_187953_60_737_+	962	678													CAMPEP_0186246670-CAMNT_0029022533	44.32			Alexandrium temarense CCMP1771	2926	Eukaryota	Archaeplastida	93930	359	0.5996	4	3	Eukaryota;Archaeplastida;Chlorophyta;Mamiellophyceae;Mamiellales;Mamiellaceae;Micromonas;Micromonas pusilla CCMP1545								0	4	150
contig_188044_120_1100_-	1101	981									KOG0673	Thymidylate synthase	Nucleotide transport and metabolism	METABOLISM	DappuP304293-scaffold_28Dappu1	73.1		CAM_CRCL_4004822	Daphnia pulex	6669	Eukaryota	Archaeplastida	93930	359	0.594	21	21	Eukaryota;Archaeplastida;Chlorophyta;Prasinophyceae;Prasinophyceae_X;Prasinophyceae_XX;Prasinophyceae_XXX;Prasinophyceae CCMP2111	_GAP_||PF00303	_GAP_||Thymidylate synthase	_GAP_||TIGR03284	_GAP_||thymidylate synthase				0	6	438
contig_188098_1_279_+	279	279	ota:Ot20g00800	COG0438: Glycosyltransferase (ISS); K01854 UDP-galactopyranose mutase [EC:5.4.99.9]		K01854	UDP-galactopyranose mutase [EC:5.4.99.9]	Galactose metabolism	5.4.99.9	Q00RT7					CAMPEP_0119132994-CAMNT_0007123663	68.48			Prasinophyceae sp. RCC2339	-311193	Eukaryota	Archaeplastida	93930	359	0.7955	10	9	Eukaryota;Archaeplastida;Chlorophyta;Chlorodendrophyceae;Chlorodendrales;Chlorodendrales_X;Tetraselmis;Tetraselmis chuii, Strain PLY429	PF03275	UDP-galactopyranose mutase						0	0	473
contig_188193_1_1160_+	1161	1160	atm:ANT_25430	hypothetical protein						E8MZM1					CAMPEP_0197844250-CAMNT_0043454949	36.54			Pterosperma, Strain CCMP1384	1461541	Eukaryota	Archaeplastida	93930	359	0.4636	3	3	Eukaryota;Archaeplastida;Chlorophyta;Pyramimonadales;Pyramimonadales_X;Pyramimonadales_XX;Pterosperma;Pterosperma, Strain CCMP1384	PF02469||_GAP_	Fasciclin domain||_GAP_						0	11	273
contig_188489_1_299_-	299	299													NAEGRDRAFT_49950-ngr648	64.29	hypothetical protein		Naegleria gruberi strain NEG-M	744533	Eukaryota	Archaeplastida	93930	359	0.6026	4	4	Eukaryota;Archaeplastida;Chlorophyta;Chlorophyceae;Chlorophyceae_X;CW-Chlamydomonadales;Chlamydomonas;Chlamydomonas reinhardtii	PF00505||_GAP_	HMG (high mobility group) box||_GAP_						0	9	1414
contig_188602_1120_2972_+	3048	1853													GNIT_2306-NC_016041	46.5	TonB-dependent receptor		Glaciecola nitratireducens FR1064	1085623	Eukaryota	Archaeplastida	93930	359	0.523	2	2	Eukaryota;Archaeplastida;Chlorophyta;Nephroselmidophyceae;Nephroselmidophyceae_X;Nephroselmidaceae;Nephroselmis;Nephroselmis pyriformis, Strain CCMP717	_GAP_||PF00593	_GAP_||TonB dependent receptor						0	3039	84
contig_188616_3685_3846_-	4432	162									KOG0326	ATP-dependent RNA helicase	RNA processing and modification	INFORMATION STORAGE AND PROCESSING	100119050-nvi1338	78.85	NV13369; putative ATP-dependent RNA helicase me31b-like		Nasonia vitripennis	7425	Eukaryota	Archaeplastida	93930	359	0.5814	16	16	Eukaryota;Opisthokonta;Metazoa;Arthropoda;Hexapoda;Insecta;Nasonia;Nasonia vitripennis	PF00270	DEAD/DEAH box helicase						0	12	73
contig_188673_2080_2427_+	4520	348	dan:Dana_GF16329	GF16329 gene product from transcript GF16329-RA; K11594 ATP-dependent RNA helicase [EC:3.6.4.13]		K11594	ATP-dependent RNA helicase DDX3X [EC:3.6.4.13]	RIG-I-like receptor signaling pathway || Hepatitis B || Viral carcinogenesis	3.6.4.13	B3LWX3					Genemark1.3786_g-C169_V2_scaffold_7	50		CAM_CRCL_10096	Coccomyxa subellipsoidea	248742	Eukaryota	Archaeplastida	93930	359	0.684	2	2	Eukaryota;Archaeplastida;Chlorophyta;Trebouxiophyceae;Trebouxiophyceae_X;Trebouxiophyceae_XX;Coccomyxa;Coccomyxa subellipsoidea								0	12	78
contig_188714_986_1630_-	1631	645	pkn:PKH_134070	hypothetical protein						B3LAU8					CAMPEP_0172489996-CAMNT_0013258251	30.61			Coscinodiscus wailesii, Strain CCMP2513	671091	Eukaryota	Archaeplastida	93930	359	0.6208	5	4	Eukaryota;Archaeplastida;Chlorophyta;Chlorophyceae;Chlorophyceae_X;CW-Chlamydomonadales;Polytomella;Polytomella parva								0	49	69
contig_188766_1022_1423_+	1476	402	fjo:Fjoh_2951	cytochrome c assembly protein						A5FFP0					CAMPEP_0198330914-CAMNT_0044035247	71.54			Madagascaria erythrocladioides	753684	Eukaryota	Archaeplastida	93930	359	0.523	2	2	Eukaryota;Archaeplastida;Rhodophyta;Compsopogonophyceae;Erythropeltidales;Erythrotrichiaceae;Madagascaria;Madagascaria erythrocladioides	PF05140||_GAP_	ResB-like family ||_GAP_						1	53	9
contig_189054_1_859_+	1292	859													CAMPEP_0184882286-CAMNT_0027386699	30.65			Asterionellopsis glacialis, Strain CCMP1581	33640	Eukaryota	Archaeplastida	93930	359	0.684	2	2	Eukaryota;Archaeplastida;Glaucocystophyta;Glaucocystophyceae;Glaucocystophytes;Glaucocystophytes_X;Gloeochaete;Gloeochaete witrockiana SAG46_84								0	50	81
contig_189193_1014_1454_+	1818	441													BRAFLDRAFT_123956-bfo2355	36.23	hypothetical protein		Branchiostoma floridae	7739	Eukaryota	Archaeplastida	93930	359	0.684	2	2	Eukaryota;Archaeplastida;Streptophyta;Embryophyceae;Embryophyceae_X;Embryophyceae_XX;Populus;Populus trichocarpa								0	0	91
contig_189314_144_437_+	730	294	phu:Phum_PHUM612100	arginine/serine-rich splicing factor, putative						E0W3X2	KOG0118	FOG: RRM domain	General function prediction only	POORLY CHARACTERIZED	CAMPEP_0199158014-CAMNT_0044882017	43.9			Vaucheria litorea, Strain CCMP2940	109269	Eukaryota	Archaeplastida	93930	359	0.684	2	2	Eukaryota;Archaeplastida;Chlorophyta;Pyramimonadales;Pyramimonadales_X;Pyramimonadales_XX;Pyramimonas;Pyramimonas, Strain CCMP2087	PF00076	RNA recognition motif. (a.k.a. RRM, RBD, or RNP domain)						0	17	138
contig_189540_1_998_+	1346	998									KOG0331	ATP-dependent RNA helicase	RNA processing and modification	INFORMATION STORAGE AND PROCESSING	LOC_Os01g36860.2-1MSU6	52.26		CAM_CRCL_10096	Oryza sativa (japonica cultivar-group) mitochondrial	39947	Eukaryota	Archaeplastida	93930	359	0.7709	36	20	Eukaryota;Archaeplastida;Streptophyta;Embryophyceae;Embryophyceae_X;Embryophyceae_XX;Oryza;Oryza sativa (japonica cultivar-group) mitochondrial	PF00270||_GAP_||PF00271||_GAP_	DEAD/DEAH box helicase||_GAP_||Helicase conserved C-terminal domain||_GAP_						0	18	79
contig_189678_992_1444_-	1609	453													BRAFLDRAFT_67459-bfo1455	42.14	hypothetical protein		Branchiostoma floridae	7739	Eukaryota	Archaeplastida	93930	359	0.5815	8	8	Eukaryota;Archaeplastida;Chlorophyta;Mamiellophyceae;Mamiellales;Mamiellaceae;Mantoniella;Mantoniella antarctica, Strain SL-175	_GAP_||PF00415||PF13540	_GAP_||Regulator of chromosome condensation (RCC1) repeat||PF13540						0	72	735
contig_189756_1_1022_+	1500	1022	ppp:PHYPADRAFT_20076	CHR1547; SNF2 family DNA-dependent ATPase domain-containing protein						A9RXS5	KOG1015	Transcription regulator XNP/ATRX, DEAD-box superfamily	Transcription	INFORMATION STORAGE AND PROCESSING	GW1.34.27.1-scaffold_34Phypa1	42.62	subsp. patens SNF2 family DNA-dependent ATPase domain-containing protein (CHR1547) mRNA, partial cds [source:RefSeq_dna_predicted;Acc:XM_001758765.1]	CAM_CRCL_18680	Physcomitrella patens	3218	Eukaryota	Archaeplastida	93930	359	0.684	2	2	Eukaryota;Archaeplastida;Streptophyta;Embryophyceae;Embryophyceae_X;Embryophyceae_XX;Physcomitrella;Physcomitrella patens								0	28	224
contig_190678_80_814_-	814	735													CAMPEP_0203058860-CAMNT_0049803107	44.16			Micromonas pusilla CCMP494	-311177	Eukaryota	Archaeplastida	93930	359	0.9693	3	3	Eukaryota;Archaeplastida;Chlorophyta;Mamiellophyceae;Mamiellales;Mamiellaceae;Micromonas;Micromonas pusilla CCMP494								0	89	2590
contig_190801_1_283_+	1037	283	mja:MJ_0323	hypothetical protein						P81301					POPTR_0010s22610.1-10JGI2	58.93		CAM_CRCL_6035617	Populus trichocarpa	3694	Eukaryota	Archaeplastida	93930	359	1	1	1	Eukaryota;Archaeplastida;Streptophyta;Embryophyceae;Embryophyceae_X;Embryophyceae_XX;Populus;Populus trichocarpa								1	7	83
contig_190823_26_646_+	646	621													CAMPEP_0190221812-CAMNT_0033936609	25			Micromonas sp. RCC472	-311215	Eukaryota	Archaeplastida	93930	359	0.977	2	2	Eukaryota;Archaeplastida;Chlorophyta;Mamiellophyceae;Mamiellales;Mamiellaceae;Micromonas;Micromonas pusilla CCMP1723								0	26	122
contig_190999_1113_1958_+	1993	846													CAMPEP_0184680058-CAMNT_0027129907	27.27			Compsopogon caeruleus	31354	Eukaryota	Archaeplastida	93930	359	1	1	1	Eukaryota;Archaeplastida;Rhodophyta;Compsopogonophyceae;Compsopogonales;Compsopogonales_X;Compsopogon;Compsopogon caeruleus								0	0	271
contig_191188_1_334_-	334	334									KOG1946	RNA polymerase I transcription factor UAF	Transcription	INFORMATION STORAGE AND PROCESSING	SPRG_01130T0-sparaCBS22365	40.95	hypothetical protein		Saprolegnia parasitica CBS 223.65	695850	Eukaryota	Archaeplastida	93930	359	0.684	2	2	Eukaryota;Archaeplastida;Chlorophyta;Chlorodendrophyceae;Chlorodendrales;Chlorodendrales_X;Tetraselmis;Tetraselmis GSL018	_GAP_||PF02201	_GAP_||SWIB/MDM2 domain						0	50	5507
contig_191244_1_465_+	572	465													RCOM_1399380-rcu1239	25.83	hypothetical protein		Ricinus communis	3988	Eukaryota	Archaeplastida	93930	359	1	1	1	Eukaryota;Archaeplastida;Streptophyta;Embryophyceae;Embryophyceae_X;Embryophyceae_XX;Ricinus;Ricinus communis	_GAP_||PF09810	_GAP_||Defects in morphology protein 1, mitochondrial precursor						0	13	49
contig_191262_1_707_+	707	707	ppp:PHYPADRAFT_224573	hypothetical protein						A9TQW9	KOG1543	Cysteine proteinase Cathepsin L	Posttranslational modification, protein turnover, chaperones	CELLULAR PROCESSES AND SIGNALING	Sb06g032320.1-6Sbi1	33.33	Putative uncharacterized protein Sb06g032320 [source:UniProtKB/TrEMBL;Acc:C5YA35_SORBI]	CAM_CRCL_70588	Sorghum bicolor	4558	Eukaryota	Archaeplastida	93930	359	0.8558	13	9	Eukaryota;Archaeplastida;Streptophyta;Embryophyceae;Embryophyceae_X;Embryophyceae_XX;Sorghum;Sorghum bicolor	PF00112||_GAP_	Papain family cysteine protease||_GAP_						0	27	153
contig_191498_931_1059_-	1060	129	cth:Cthe_0137	glyceraldehyde-3-phosphate dehydrogenase (EC:1.2.1.12); K00134 glyceraldehyde 3-phosphate dehydrogenase [EC:1.2.1.12]	cth01120||cth00010||cth01110||cth01100	K00134	glyceraldehyde 3-phosphate dehydrogenase [EC:1.2.1.12]	Glycolysis / Gluconeogenesis || Carbon fixation in photosynthetic organisms || Carbon metabolism || Biosynthesis of amino acids || HIF-1 signaling pathway || Alzheimer's disease	1.2.1.12	A3DBP9					evm.model.contig_2393.1-ppurpureum	84	hypothetical protein		Porphyridium purpureum	35688	Eukaryota	Archaeplastida	93930	359	0.3901	5	5	Eukaryota;Archaeplastida;Chlorophyta;Mamiellophyceae;Dolichomastigales;Dolichomastigaceae;Dolichomastix;Dolichomastix tenuilepis								0	8	104
contig_191704_1035_1361_-	1380	327													CAMPEP_0193710560-CAMNT_0038220547	37.18			Chrysochromulina polylepis CCMP1757	-311224	Eukaryota	Archaeplastida	93930	359	0.684	2	2	Eukaryota;Archaeplastida;Chlorophyta;Mamiellophyceae;Mamiellales;Mamiellaceae;Micromonas;Micromonas sp. NEPCC29								0	1	80
contig_192214_1019_1484_+	1485	466	smm:Smp_094640	zinc finger protein						C1M0L1					ENSDARP00000110513-Zv9_NA251Zv9	47.14		CAM_CRCL_1433	Danio rerio	7955	Eukaryota	Archaeplastida	93930	359	0.684	2	2	Eukaryota;Archaeplastida;Rhodophyta;Stylonematophyceae;Porphyridiales-2;Stylonematales-Group-II;Rhodosorus;Rhodosorus marinus CCMP769	_GAP_||PF00096	_GAP_||Zinc finger, C2H2 type						0	3	782
contig_192356_1_335_+	678	335													CAMPEP_0191482608-CAMNT_0035470399	46.51			Pyramimonas parkeae	36894	Eukaryota	Archaeplastida	93930	359	1	1	1	Eukaryota;Archaeplastida;Chlorophyta;Pyramimonadales;Pyramimonadales_X;Pyramimonadales_XX;Pyramimonas;Pyramimonas parkeae								0	15	974
contig_192468_64_579_-	579	516													BRADI5G21820.1-5Brachy1	31.9		CAM_CRCL_4011037	Brachypodium distachyon	15368	Eukaryota	Archaeplastida	93930	359	1	1	1	Eukaryota;Archaeplastida;Streptophyta;Embryophyceae;Embryophyceae_X;Embryophyceae_XX;Brachypodium;Brachypodium distachyon								0	0	57
contig_192729_1133_1837_+	2047	705													CAMPEP_0179012240-CAMNT_0020707677	34.22			Pyrodinium bahamense	73915	Eukaryota	Archaeplastida	93930	359	0.6374	6	6	Eukaryota;Archaeplastida;Chlorophyta;Prasinophyceae;Prasinophyceae_X;Prasinophyceae_XX;Prasinophyceae_XXX;Prasinophyceae RCC701	PF03092||_GAP_	BT1 family||_GAP_			FBT		3	3	9	351
contig_193041_487_936_-	1119	450	ppp:PHYPADRAFT_104959	hypothetical protein						A9RP51	KOG1176	Acyl-CoA synthetase	Lipid transport and metabolism	METABOLISM	ESTEXT_FGENESH1_PM.C_200030-scaffold_20Phypa1	58.99	subsp. patens predicted protein (PHYPADRAFT_104959) mRNA, complete cds [source:RefSeq_dna_predicted;Acc:XM_001755891.1]	CAM_CRCL_3164	Physcomitrella patens	3218	Eukaryota	Archaeplastida	93930	359	0.5905	32	24	Eukaryota;Archaeplastida;Streptophyta;Embryophyceae;Embryophyceae_X;Embryophyceae_XX;Physcomitrella;Physcomitrella patens	PF00501||PF13193	AMP-binding enzyme||PF13193						0	17	213
contig_193094_1126_1464_+	1465	339	cat:CA2559_02515	glutamate dehydrogenase; K00262 glutamate dehydrogenase (NADP+) [EC:1.4.1.4]	cat00330||cat01100||cat00910||cat00250	K00262	glutamate dehydrogenase (NADP+) [EC:1.4.1.4]	Alanine, aspartate and glutamate metabolism || Arginine and proline metabolism || Nitrogen metabolism	1.4.1.4	A3U5S5					CAMPEP_0184738092-CAMNT_0027205659	63.39			Rhodosorus marinus UTEX LB2760	-311208	Eukaryota	Archaeplastida	93930	359	0.8762	3	3	Eukaryota;Archaeplastida;Rhodophyta;Stylonematophyceae;Porphyridiales-2;Stylonematales-Group-II;Rhodosorus;Rhodosorus marinus CCMP769	PF00208	Glutamate/Leucine/Phenylalanine/Valine dehydrogenase						0	0	166
contig_193492_204_371_+	777	168													CAMPEP_0200937316-CAMNT_0047136541	73.47			Tetraselmis striata, Strain LANL1001	3165	Eukaryota	Archaeplastida	93930	359	1	1	1	Eukaryota;Archaeplastida;Chlorophyta;Chlorodendrophyceae;Chlorodendrales;Chlorodendrales_X;Tetraselmis;Tetraselmis striata, Strain LANL1001								0	208	3731
contig_193501_1_501_+	501	501													CAMPEP_0193131840-CAMNT_0037480571	37.74			Thraustochytrium sp LLF1b	1112570	Eukaryota	Archaeplastida	93930	359	0.684	2	2	Eukaryota;Archaeplastida;Rhodophyta;Rhodellophyceae;Rhodellales;Rhodellales_X;Rhodella;Rhodella maculata CCMP736								0	20	353
contig_193507_1_702_-	702	702	ppp:PHYPADRAFT_215149	hypothetical protein						A9SS48					Pmar_PMAR008731-NW_003209437	64.81	aldehyde-dehydrogenase, putative	CAM_CRCL_4007339	Perkinsus marinus ATCC 50983	423536	Eukaryota	Archaeplastida	93930	359	0.6323	6	5	Eukaryota;Archaeplastida;Rhodophyta;Stylonematophyceae;Porphyridiales-2;Stylonematales-Group-II;Rhodosorus;Rhodosorus marinus CCMP769	PF00171	Aldehyde dehydrogenase family						0	0	60
contig_193731_1_436_+	508	436													CAMPEP_0170141522-CAMNT_0010377797	45			Dolichomastix tenuilepis	195969	Eukaryota	Archaeplastida	93930	359	0.8736	5	2	Eukaryota;Archaeplastida;Chlorophyta;Mamiellophyceae;Dolichomastigales;Dolichomastigaceae;Dolichomastix;Dolichomastix tenuilepis	PF13676	TIR domain						0	14	59
contig_193805_1020_1301_+	1548	282													CAMPEP_0190206892-CAMNT_0033920121	43.59			Micromonas sp. NEPCC29	-311216	Eukaryota	Archaeplastida	93930	359	1	1	1	Eukaryota;Archaeplastida;Chlorophyta;Mamiellophyceae;Mamiellales;Mamiellaceae;Micromonas;Micromonas sp. NEPCC29								0	13	178
contig_194067_70_450_+	524	381													CAMPEP_0197490096-CAMNT_0043034555	59.09			Prasinophyceae sp. RCC856	464258	Eukaryota	Archaeplastida	93930	359	0.8373	2	2	Eukaryota;Archaeplastida;Chlorophyta;Mamiellophyceae;Mamiellales;Mamiellaceae;Micromonas;Micromonas sp. RCC451								0	263	1236
contig_194122_1_482_+	689	482													CAMPEP_0196666738-CAMNT_0042003975	39.71			Cyanoptyche gloeocystis , Strain SAG4.97	-283593	Eukaryota	Archaeplastida	93930	359	0.5719	4	4	Eukaryota;Archaeplastida;Chlorophyta;Prasinophyceae;Prasinophyceae_X;Prasinophyceae_XX;Prasinophyceae_XXX;Prasinophyceae RCC1871								0	90	1733
contig_194131_971_1297_-	1298	327													fgenesh2_kg.5__2388__AT3G59290.1-5Araly1	62.86		CAM_CRCL_19907	Arabidopsis lyrata	59689	Eukaryota	Archaeplastida	93930	359	0.6725	4	4	Eukaryota;Archaeplastida;Streptophyta;Brassicales;Brassicaceae;Camelineae;Arabidopsis;Arabidopsis lyrata								0	9	331
contig_194150_234_608_+	608	375													CAMPEP_0196640594-CAMNT_0041969773	38.38			Pycnococcus sp, Strain CCM1998	-283591	Eukaryota	Archaeplastida	93930	359	0.7023	4	4	Eukaryota;Archaeplastida;Chlorophyta;Prasinophyceae;Prasinophyceae_X;Prasinophyceae_XX;Prasinophyceae_XXX;Unidentified, Strain CCMP1205								0	9	913
contig_194653_960_1583_-	1584	624									KOG1491	Predicted GTP-binding protein (ODN superfamily)	General function prediction only	POORLY CHARACTERIZED	CAMPEP_0197961234-CAMNT_0043589903	88.06			Polarella glacialis, Strain CCMP2088	89957	Eukaryota	Archaeplastida	93930	359	0.5999	18	18	Eukaryota;Archaeplastida;Chlorophyta;Mamiellophyceae;Mamiellales;Bathycoccaceae;Ostreococcus;Ostreococcus mediterraneus clade-D-RCC1107	_GAP_||PF01926	_GAP_||GTPase of unknown function						1	10	360
contig_194746_201_990_-	990	790									KOG0693	Myo-inositol-1-phosphate synthase	Lipid transport and metabolism	METABOLISM	GRMZM2G004528_P03-9AGPv2	65.27		CAM_CRCL_4968	Zea mays	4577	Eukaryota	Archaeplastida	93930	359	0.7346	45	22	Eukaryota;Archaeplastida;Streptophyta;Embryophyceae;Embryophyceae_X;Embryophyceae_XX;Oryza;Oryza sativa (japonica cultivar-group) mitochondrial	PF07994	Myo-inositol-1-phosphate synthase						0	0	60
contig_194758_543_1004_+	1005	462													CAMPEP_0196638592-CAMNT_0041967455	32.73			Pycnococcus sp, Strain CCM1998	-283591	Eukaryota	Archaeplastida	93930	359	1	1	1	Eukaryota;Archaeplastida;Chlorophyta;Prasino-Clade-V;Prasino-Clade-V_X;Pycnococcaceae;Pycnococcus;Pycnococcus sp, Strain CCM1998								0	0	197
contig_195244_1_298_-	298	298													CAMPEP_0119129270-CAMNT_0007119689	41.67			Prasinophyceae sp. RCC2339	-311193	Eukaryota	Archaeplastida	93930	359	1	1	1	Eukaryota;Archaeplastida;Chlorophyta;Prasinophyceae;unclassified Prasinophyceae;unclassified Prasinophyceae_X;unclassified Prasinophyceae_XX;Prasinophyceae sp. RCC2339								0	10	429
contig_195394_1044_1737_+	1738	694													CAMPEP_0203000000-CAMNT_0049741453	38.66			Micromonas sp. RCC451	-311172	Eukaryota	Archaeplastida	93930	359	0.9617	6	6	Eukaryota;Archaeplastida;Chlorophyta;Mamiellophyceae;Mamiellales;Mamiellaceae;Micromonas;Micromonas pusilla CCMP1723								0	63	88
contig_195481_1085_1473_+	1474	389	cre:CHLREDRAFT_196833	MME1; NAD malic enzyme (EC:1.1.1.39); K00028 malate dehydrogenase (decarboxylating) [EC:1.1.1.39]	cre01100||cre00620||cre00710	K00028	malate dehydrogenase (decarboxylating) [EC:1.1.1.39]	Pyruvate metabolism || Carbon fixation in photosynthetic organisms || Carbon metabolism	1.1.1.39	A8HWC2	KOG1257	NADP+-dependent malic enzyme	Energy production and conversion	METABOLISM	CAMPEP_0197484412-CAMNT_0043027051	48.82			Prasinophyceae sp. RCC998	464263	Eukaryota	Archaeplastida	93930	359	0.6368	6	6	Eukaryota;Archaeplastida;Chlorophyta;Chlorophyceae;Chlorophyceae_X;CW-Chlamydomonadales;Chlamydomonas;Chlamydomonas reinhardtii	PF03949	Malic enzyme, NAD binding domain						0	1	160
contig_195481_159_1058_+	1474	900	cre:CHLREDRAFT_196833	MME1; NAD malic enzyme (EC:1.1.1.39); K00028 malate dehydrogenase (decarboxylating) [EC:1.1.1.39]	cre01100||cre00620||cre00710	K00028	malate dehydrogenase (decarboxylating) [EC:1.1.1.39]	Pyruvate metabolism || Carbon fixation in photosynthetic organisms || Carbon metabolism	1.1.1.39	A8HWC2	KOG1257	NADP+-dependent malic enzyme	Energy production and conversion	METABOLISM	35204-Astpho1_scaffold_00084	53.79			Asterochloris Cgr/DA1pho	763042	Eukaryota	Archaeplastida	93930	359	0.7405	11	11	Eukaryota;Archaeplastida;Chlorophyta;Chlorophyceae;Chlorophyceae_X;CW-Chlamydomonadales;Chlamydomonas;Chlamydomonas leiostraca, Strain SAG 11-49	_GAP_||PF00390	_GAP_||Malic enzyme, N-terminal domain						0	9	333
contig_195769_210_956_-	1682	747													CAMPEP_0190740264-CAMNT_0034564283	65.71			Picocystis salinarum CCMP1897	88271	Eukaryota	Archaeplastida	93930	359	0.8281	10	8	Eukaryota;Archaeplastida;Chlorophyta;Chlorodendrophyceae;Chlorodendrales;Chlorodendrales_X;Tetraselmis;Tetraselmis GSL018	PF09418	Protein of unknown function (DUF2009)						0	12	141
contig_195769_977_1681_-	1682	705	cre:CHLREDRAFT_192990	hypothetical protein						A8J940					EDO99602-DS496145v3	56.04	hypothetical protein	CAM_CRCL_4050842	Chlamydomonas reinhardtii	3055	Eukaryota	Archaeplastida	93930	359	0.8135	21	16	Eukaryota;Archaeplastida;Chlorophyta;Mamiellophyceae;Mamiellales;Bathycoccaceae;Ostreococcus;Ostreococcus mediterraneus clade-D-RCC1621	PF09418	Protein of unknown function (DUF2009)						0	6	119
contig_196101_1029_1427_+	1508	399													contig_303_96_1749-Gtenu	70.54		CAM_CRCL_4005936	Gracilaria tenuistipitata var. liui	285951	Eukaryota	Archaeplastida	93930	359	0.7038	6	6	Eukaryota;Archaeplastida;Rhodophyta;Florideophyceae;Gracilariales;Gracilariales_X;Gracilaria;Gracilaria changii	PF03143	Elongation factor Tu C-terminal domain						0	0	142
contig_196669_1_283_+	283	283	tps:THAPSDRAFT_23259	hypothetical protein						B8C4E6					CAMPEP_0206080156-CAMNT_0053459645	71.11			Unidentified, Strain CCMP1205	44458	Eukaryota	Archaeplastida	93930	359	0.977	2	2	Eukaryota;Archaeplastida;Chlorophyta;Prasinophyceae;Prasinophyceae_X;Prasinophyceae_XX;Prasinophyceae_XXX;Unidentified sp, Strain CCMP2175								0	0	53
contig_196815_1_339_-	409	339													CAMPEP_0188670972-CAMNT_0032094305	44.21			Heterosigma akashiwo CCMP452	536046	Eukaryota	Archaeplastida	93930	359	0.684	2	2	Eukaryota;Archaeplastida;Chlorophyta;Mamiellophyceae;Dolichomastigales;Crustomastigaceae;Crustomastix;Crustomastix stigmata, Strain CCMP3273								0	1	190
contig_197066_365_883_+	883	519													RCOM_0852720-rcu1410	23.33	cation efflux protein/ zinc transporter, putative		Ricinus communis	3988	Eukaryota	Archaeplastida	93930	359	1	1	1	Eukaryota;Archaeplastida;Streptophyta;Embryophyceae;Embryophyceae_X;Embryophyceae_XX;Ricinus;Ricinus communis								0	4	421
contig_197135_1_449_+	596	449													659193-tca1398	37.88	Br-c, br-NZ2, br-Z2; broad-complex		Tribolium castaneum	7070	Eukaryota	Archaeplastida	93930	359	0.684	2	2	Eukaryota;Archaeplastida;Rhodophyta;Unclassified_Rhodophyta;Unclassified_Rhodophyta_X;Unclassified_Rhodophyta_XX;Coastal Red Alga;Cyanoptycaceae sp.								0	29	536
contig_197423_72_827_+	980	756	phu:Phum_PHUM317680	histone RNA hairpin-binding protein, putative						E0VMR0	KOG3934	Histone mRNA stem-loop binding protein	RNA processing and modification	INFORMATION STORAGE AND PROCESSING	PHUM317680-PA-DS235322PhumU1	41.48	histone RNA hairpin-binding protein, putative	CAM_CRCL_4009823	Pediculus humanus	121225	Eukaryota	Archaeplastida	93930	359	0.684	2	2	Eukaryota;Archaeplastida;Glaucocystophyta;Glaucocystophyceae;Glaucocystophytes;Cyanoptycaceae;Cyanoptyche;Cyanoptyche gloeocystis, Strain SAG4.97	_GAP_||PF15247||_GAP_	_GAP_||PF15247||_GAP_						0	7	668
contig_197514_1_1017_+	3068	1017													CAMPEP_0118957478-CAMNT_0006905561	29.31			Pyramimonas obovata CCMP722	-311159	Eukaryota	Archaeplastida	93930	359	0.4636	3	3	Eukaryota;Archaeplastida;Chlorophyta;Pyramimonadales;Pyramimonadales_X;Pyramimonadales_XX;Pyramimonas;Pyramimonas obovata CCMP722								0	32	151
contig_197569_1_533_+	1385	533													CAMPEP_0119119588-CAMNT_0007109033	31.48			Prasinophyceae sp. RCC2339	-311193	Eukaryota	Archaeplastida	93930	359	1	1	1	Eukaryota;Archaeplastida;Chlorophyta;Prasinophyceae;unclassified Prasinophyceae;unclassified Prasinophyceae_X;unclassified Prasinophyceae_XX;Prasinophyceae sp. RCC2339								1	43	56
contig_197632_984_1775_-	4129	792													CAMPEP_0202889834-CAMNT_0049573255	31			Chlamydomonas chlamydogama, Strain SAG 11-48b	225041	Eukaryota	Archaeplastida	93930	359	0.684	2	2	Eukaryota;Archaeplastida;Chlorophyta;Chlorophyceae;Chlorophyceae_X;CW-Chlamydomonadales;Chlamydomonas;Chlamydomonas chlamydogama, Strain SAG 11-48b								0	54	314
contig_197650_1068_1265_+	1428	198													CAMPEP_0197866748-CAMNT_0043485337	52.78			Pterosperma, Strain CCMP1384	1461541	Eukaryota	Archaeplastida	93930	359	1	1	1	Eukaryota;Archaeplastida;Chlorophyta;Pyramimonadales;Pyramimonadales_X;Pyramimonadales_XX;Pterosperma;Pterosperma, Strain CCMP1384								0	16	279
contig_197793_1_369_-	416	369	ote:Oter_0944	RNP-1 like RNA-binding protein						B1ZWV3	KOG0118	FOG: RRM domain	General function prediction only	POORLY CHARACTERIZED	CAMPEP_0199158014-CAMNT_0044882017	38.55			Vaucheria litorea, Strain CCMP2940	109269	Eukaryota	Archaeplastida	93930	359	0.4636	3	3	Eukaryota;Archaeplastida;Chlorophyta;Chlorophyceae;Chlorophyceae_X;CW-Chlamydomonadales;Chlamydomonas;Chlamydomonas chlamydogama, Strain SAG 11-48b	PF00076||_GAP_	RNA recognition motif. (a.k.a. RRM, RBD, or RNP domain)||_GAP_						0	4	355
contig_198090_895_1743_-	1744	849	dgr:Dgri_GH19965	GH19965 gene product from transcript GH19965-RA						B4J8E6	KOG1948	Metalloproteinase-related collagenase pM5	Posttranslational modification, protein turnover, chaperones	CELLULAR PROCESSES AND SIGNALING	SPU_014645tr-scaffold_237Spur2	27.1		CAM_CRCL_6084141	Strongylocentrotus purpuratus	7668	Eukaryota	Archaeplastida	93930	359	0.736	3	3	Eukaryota;Archaeplastida;Glaucocystophyta;Glaucocystophyceae;Glaucocystophytes;Cyanoptycaceae;Cyanoptyche;Cyanoptyche gloeocystis, Strain SAG4.97								0	45	202
contig_198123_817_1707_-	2531	891	tps:THAPSDRAFT_1456	IDH1; hypothetical protein						B8BR03					CAMPEP_0199577554-CAMNT_0045419165	70.51			Symbiodinium, Strain C1	226962	Eukaryota	Archaeplastida	93930	359	0.7893	3	2	Eukaryota;Archaeplastida;Chlorophyta;Chlorodendrophyceae;Chlorodendrales;Chlorodendrales_X;Tetraselmis;Tetraselmis astigmatica, Strain CCMP880	PF03971||_GAP_	Monomeric isocitrate dehydrogenase||_GAP_						0	38	212
contig_198393_25_858_-	1956	834									KOG1721	FOG: Zn-finger	General function prediction only	POORLY CHARACTERIZED	CAMPEP_0191524626-CAMNT_0035528983	33.58			Rhodella maculata CCMP736	38298	Eukaryota	Archaeplastida	93930	359	0.7893	3	2	Eukaryota;Stramenopiles;Stramenopiles_X;Oomyceta;Oomyceta_X;Oomyceta_XX;Phytophthora;Phytophthora infestans	_GAP_||PF13894||_GAP_	_GAP_||PF13894||_GAP_						0	18	213
contig_198403_1_478_+	545	478													CAMPEP_0196650674-CAMNT_0041980573	50			Pycnococcus sp, Strain CCM1998	-283591	Eukaryota	Archaeplastida	93930	359	1	1	1	Eukaryota;Archaeplastida;Chlorophyta;Prasino-Clade-V;Prasino-Clade-V_X;Pycnococcaceae;Pycnococcus;Pycnococcus sp, Strain CCM1998								0	46	1989
contig_198776_1_509_-	509	509													CAMPEP_0175067876-CAMNT_0016334821	28.07			Polytomella parva	51329	Eukaryota	Archaeplastida	93930	359	0.7472	5	3	Eukaryota;Archaeplastida;Chlorophyta;Chlorophyceae;Chlorophyceae_X;CW-Chlamydomonadales;Polytomella;Polytomella parva								0	31	22
contig_19885_263_425_-	425	163													PAC:15405944-scaffold_10	44.19		CAM_CRCL_26571	Selaginella moellendorffii	88036	Eukaryota	Archaeplastida	93930	359	1	1	1	Eukaryota;Archaeplastida;Streptophyta;Embryophyceae;Embryophyceae_X;Embryophyceae_XX;Selaginella;Selaginella moellendorffii								0	4	46
contig_198948_1_669_-	669	669	nve:NEMVE_v1g113199	hypothetical protein						A7SCB6					NEMVEDRAFT_v1g113199-PA-scaffold_116Nemve1	26.52	Predicted protein [Source:UniProtKB/TrEMBL;Acc:A7SCB6]	CAM_CRCL_6375753	Nematostella vectensis	45351	Eukaryota	Archaeplastida	93930	359	0.5786	3	3	Eukaryota;Archaeplastida;Rhodophyta;Unclassified_Rhodophyta;Unclassified_Rhodophyta_X;Unclassified_Rhodophyta_XX;Coastal Red Alga;Cyanoptycaceae sp.								1	51	61
contig_199071_1_485_+	485	485													Al_scaffold_0008_1402-8Araly1	29.76		CAM_CRCL_6024135	Arabidopsis lyrata	59689	Eukaryota	Archaeplastida	93930	359	1	1	1	Eukaryota;Archaeplastida;Streptophyta;Brassicales;Brassicaceae;Camelineae;Arabidopsis;Arabidopsis lyrata								0	7	48
contig_199283_1_575_-	575	575													CAMPEP_0113959360-CAMNT_0000970669	37.27			Rhodosorus marinus CCMP769	-311207	Eukaryota	Archaeplastida	93930	359	0.8373	4	3	Eukaryota;Archaeplastida;Rhodophyta;Compsopogonophyceae;Compsopogonales;Compsopogonales_X;Compsopogon;Compsopogon caeruleus	PF13465||PF13894||_GAP_	PF13465||PF13894||_GAP_						0	12	75
contig_199446_10_998_-	998	989	isc:IscW_ISCW010256	hypothetical protein; K09512 DnaJ homolog subfamily B member 6		K09512	DnaJ homolog subfamily B member 6			B7Q3H0	KOG0714	Molecular chaperone (DnaJ superfamily)	Posttranslational modification, protein turnover, chaperones	CELLULAR PROCESSES AND SIGNALING	CAMPEP_0198228968-CAMNT_0043909405	31.15			Pyramimonas, Strain CCMP2087	36898	Eukaryota	Archaeplastida	93930	359	0.5908	6	6	Eukaryota;Opisthokonta;Metazoa;Arthropoda;Chelicerata;Arachnida;Ixodes;Ixodes scapularis	PF00226||_GAP_	DnaJ domain||_GAP_						0	30	187
contig_199508_475_948_+	1604	474													CAMPEP_0196644970-CAMNT_0041974551	35.76			Pycnococcus sp, Strain CCM1998	-283591	Eukaryota	Archaeplastida	93930	359	0.8956	4	4	Eukaryota;Archaeplastida;Chlorophyta;Mamiellophyceae;Mamiellales;Mamiellaceae;Micromonas;Micromonas pusilla CCMP1723								0	10	325
contig_199571_564_1034_+	1362	471													CAMPEP_0195545746-CAMNT_0040680119	34.02			Prasinoderma coloniale, Strain CCMP1413	156133	Eukaryota	Archaeplastida	93930	359	1	1	1	Eukaryota;Archaeplastida;Chlorophyta;Prasinococcales;Prasinococcales_X;Prasinococcales-Clade-B;Prasinoderma;Prasinoderma coloniale, Strain CCMP1413								0	32	127
contig_200110_36_1028_-	1125	993									KOG2854	Possible pfkB family carbohydrate kinase	Carbohydrate transport and metabolism	METABOLISM	AAEL001102-PA-supercont123	55.45	adenosine kinase	CAM_CRCL_7686	Phytophthora infestans	4787	Eukaryota	Archaeplastida	93930	359	0.5949	8	7	Eukaryota;Archaeplastida;Streptophyta;Embryophyceae;Embryophyceae_X;Embryophyceae_XX;Vitis;Vitis vinifera	PF00294	pfkB family carbohydrate kinase						0	13	105
contig_20144_1_453_+	453	453													CAMPEP_0170137724-CAMNT_0010373619	81.54			Dolichomastix tenuilepis	195969	Eukaryota	Archaeplastida	93930	359	0.5778	54	45	Eukaryota;Archaeplastida;Chlorophyta;Mamiellophyceae;Mamiellales;Bathycoccaceae;Ostreococcus;Ostreococcus RCC809	PF00464	Serine hydroxymethyltransferase						0	1	74
contig_20469_1_269_-	304	269	ote:Oter_0944	RNP-1 like RNA-binding protein						B1ZWV3	KOG0107	Alternative splicing factor SRp20/9G8 (RRM superfamily)	RNA processing and modification	INFORMATION STORAGE AND PROCESSING	CAMPEP_0198203422-CAMNT_0043874815	40.21			Pyramimonas, Strain CCMP2087	36898	Eukaryota	Archaeplastida	93930	359	0.684	2	2	Eukaryota;Archaeplastida;Chlorophyta;Pyramimonadales;Pyramimonadales_X;Pyramimonadales_XX;Pyramimonas;Pyramimonas, Strain CCMP2087	PF00076	RNA recognition motif. (a.k.a. RRM, RBD, or RNP domain)						0	0	237
contig_20645_46_596_+	596	551	ppp:PHYPADRAFT_217835	hypothetical protein		K10523	speckle-type POZ protein			A9T0Y5	KOG1987	Speckle-type POZ protein SPOP and related proteins with TRAF, MATH and BTB/POZ domains	Cell cycle control, cell division, chromosome partitioning	CELLULAR PROCESSES AND SIGNALING	BRADI3G40745.1-3Brachy1	30.88		CAM_CRCL_55546	Brachypodium distachyon	15368	Eukaryota	Archaeplastida	93930	359	0.9392	8	5	Eukaryota;Archaeplastida;Streptophyta;Embryophyceae;Embryophyceae_X;Embryophyceae_XX;Oryza;Oryza sativa Indica Group	PF00651||_GAP_	BTB/POZ domain||_GAP_						0	0	77
contig_20756_108_407_-	407	300													CAMPEP_0190208852-CAMNT_0033922315	32.1			Micromonas sp. NEPCC29	-311216	Eukaryota	Archaeplastida	93930	359	0.977	2	2	Eukaryota;Archaeplastida;Chlorophyta;Mamiellophyceae;Mamiellales;Mamiellaceae;Micromonas;Micromonas pusilla RCC1614								0	0	54
contig_21387_142_540_-	584	399	vcn:VOLCADRAFT_73615	hstH2A-10; histone H2A							KOG1756	Histone 2A	Chromatin structure and dynamics	INFORMATION STORAGE AND PROCESSING	jgi_73615_7102.m000033-Volca1	72.97	Core histone H2A/H2B/H3/H4	CAM_CRCL_4142734	Volvox carteri	3067	Eukaryota	Archaeplastida	93930	359	0.7417	45	19	Eukaryota;Archaeplastida;Chlorophyta;Chlorophyceae;Chlorophyceae_X;CW-Chlamydomonadales;Volvox;Volvox carteri	PF00125||_GAP_	Core histone H2A/H2B/H3/H4||_GAP_						2	3	162
contig_23392_1_618_+	618	618	pmy:Pmen_1099	cyanophycinase						A4XRA0					CAMPEP_0198332254-CAMNT_0044036697	62.09			Madagascaria erythrocladioides	753684	Eukaryota	Archaeplastida	93930	359	1	1	1	Eukaryota;Archaeplastida;Rhodophyta;Compsopogonophyceae;Erythropeltidales;Erythrotrichiaceae;Madagascaria;Madagascaria erythrocladioides								0	1	73
contig_23688_40_424_-	424	385									KOG1329	Phospholipase D1	Lipid transport and metabolism	METABOLISM	RCOM_0899520-rcu2427	49.22	phopholipase d alpha, putative (EC:3.1.4.4)		Ricinus communis	3988	Eukaryota	Archaeplastida	93930	359	0.8642	13	10	Eukaryota;Archaeplastida;Streptophyta;Embryophyceae;Embryophyceae_X;Embryophyceae_XX;Vitis;Vitis vinifera	_GAP_||PF12357	_GAP_||Phospholipase D C terminal						0	1	51
contig_23818_1_299_+	343	299									KOG1721	FOG: Zn-finger	General function prediction only	POORLY CHARACTERIZED	ORF117514-Lotgi1	26.97	hypothetical protein	CAM_CRCL_4002064	Lottia gigantea	225164	Eukaryota	Archaeplastida	93930	359	0.6026	4	4	Eukaryota;Opisthokonta;Metazoa;Arthropoda;Hexapoda;Insecta;Acyrthosiphon;Acyrthosiphon pisum								0	1	66
contig_2403_35_985_+	1031	951													contig_13386_1_934-NitzIllumina	50.63		CAM_CRCL_4041008	Nitzschia MBIC11128	284796	Eukaryota	Archaeplastida	93930	359	0.684	2	2	Eukaryota;Archaeplastida;Rhodophyta;Compsopogonophyceae;Erythropeltidales;Erythrotrichiaceae;Madagascaria;Madagascaria erythrocladioides			_GAP_||TIGR04183	_GAP_||TIGR04183				0	3293	65
contig_24288_919_1470_-	1521	552									KOG2362	Uncharacterized Fe-S protein	General function prediction only	POORLY CHARACTERIZED	CAMPEP_0193481432-CAMNT_0037933653	37.93			Undescribed sp D1	-289870	Eukaryota	Archaeplastida	93930	359	0.684	2	2	Eukaryota;Archaeplastida;Chlorophyta;Pyramimonadales;Pyramimonadales_X;Pyramimonadales_XX;Pterosperma;Pterosperma, Strain CCMP1384	PF03476||_GAP_	MOSC N-terminal beta barrel domain||_GAP_						0	2	153
contig_26222_1_448_+	448	448	alt:ambt_19820	aldehyde dehydrogenase											CAMPEP_0200300384-CAMNT_0046330963	64.86			Aplanochytrium sp, Strain PBS07	627963	Eukaryota	Archaeplastida	93930	359	0.5388	10	9	Eukaryota;Archaeplastida;Rhodophyta;Stylonematophyceae;Porphyridiales-2;Stylonematales-Group-II;Rhodosorus;Rhodosorus marinus CCMP769	PF00171	Aldehyde dehydrogenase family						0	0	64
contig_26375_1_522_+	522	522													BRAFLDRAFT_85147-bfo2943	49.37	hypothetical protein		Branchiostoma floridae	7739	Eukaryota	Archaeplastida	93930	359	0.5719	4	4	Eukaryota;Archaeplastida;Chlorophyta;Chlorophyceae;Chlorophyceae_X;CW-Chlamydomonadales;Chlamydomonas;Chlamydomonas chlamydogama, Strain SAG 11-48b	PF00179||_GAP_	Ubiquitin-conjugating enzyme||_GAP_						0	0	57
contig_26458_121_442_+	442	322	phu:Phum_PHUM534180	RNA-binding protein, putative						E0VZH8	KOG0125	Ataxin 2-binding protein (RRM superfamily)	General function prediction only	POORLY CHARACTERIZED	CAMPEP_0198203422-CAMNT_0043874815	47.62			Pyramimonas, Strain CCMP2087	36898	Eukaryota	Archaeplastida	93930	359	1	1	1	Eukaryota;Archaeplastida;Chlorophyta;Pyramimonadales;Pyramimonadales_X;Pyramimonadales_XX;Pyramimonas;Pyramimonas, Strain CCMP2087	PF13893||_GAP_	PF13893||_GAP_						0	15	674
contig_26674_1_397_+	397	397	isc:IscW_ISCW003308	hypothetical protein						B7PBI5	KOG3974	Predicted sugar kinase	Carbohydrate transport and metabolism	METABOLISM	ISCW003308-PA-DS676278IscaW1	46.36	conserved hypothetical protein	CAM_CRCL_4000388	Ixodes scapularis	6945	Eukaryota	Archaeplastida	93930	359	0.6266	6	5	Eukaryota;Opisthokonta;Metazoa;Arthropoda;Chelicerata;Arachnida;Ixodes;Ixodes scapularis	PF01256	Carbohydrate kinase						0	2	49
contig_26985_1_448_-	448	448									KOG0865	Cyclophilin type peptidyl-prolyl cis-trans isomerase	Posttranslational modification, protein turnover, chaperones	CELLULAR PROCESSES AND SIGNALING	CAMPEP_0199593976-CAMNT_0045438083	80.56			Symbiodinium, Strain C1	226962	Eukaryota	Archaeplastida	93930	359	0.598	14	13	Eukaryota;Archaeplastida;Chlorophyta;Mamiellophyceae;Mamiellales;Mamiellaceae;Micromonas;Micromonas RCC299	PF00160	Cyclophilin type peptidyl-prolyl cis-trans isomerase/CLD						0	0	72
contig_27315_1_396_-	396	396													CAMPEP_0201730282-CAMNT_0048222791	39.58			Skeletonema japonicum, Strain CCMP2506	267983	Eukaryota	Archaeplastida	93930	359	0.6358	9	8	Eukaryota;Archaeplastida;Streptophyta;Embryophyceae;Embryophyceae_X;Embryophyceae_XX;Brachypodium;Brachypodium distachyon	_GAP_||PF01753	_GAP_||MYND finger						0	2	82
contig_27433_1_425_-	425	425													CAMPEP_0119131084-CAMNT_0007121637	24.8			Prasinophyceae sp. RCC2339	-311193	Eukaryota	Archaeplastida	93930	359	0.776	2	2	Eukaryota;Archaeplastida;Chlorophyta;Prasinophyceae;unclassified Prasinophyceae;unclassified Prasinophyceae_X;unclassified Prasinophyceae_XX;Prasinophyceae sp. RCC2339								0	0	57
contig_27540_1_361_-	361	361													CAMPEP_0119128844-CAMNT_0007119217	31.68			Prasinophyceae sp. RCC2339	-311193	Eukaryota	Archaeplastida	93930	359	1	1	1	Eukaryota;Archaeplastida;Chlorophyta;Prasinophyceae;unclassified Prasinophyceae;unclassified Prasinophyceae_X;unclassified Prasinophyceae_XX;Prasinophyceae sp. RCC2339								0	0	52
contig_27955_1_450_+	450	450													ENSCSAVP00000001864-reftig:CSAV2	41.94		CAM_CRCL_26319	Ciona savignyi	51511	Eukaryota	Archaeplastida	93930	359	0.6026	4	4	Eukaryota;Archaeplastida;Chlorophyta;Mamiellophyceae;Mamiellales;Mamiellaceae;Micromonas;Micromonas sp. NEPCC29								0	2	56
contig_2819_24_575_+	874	552	kdi:Krodi_2016	GrpE protein; K03687 molecular chaperone GrpE		K03687	molecular chaperone GrpE								CAMPEP_0198356644-CAMNT_0044063169	68.68			Madagascaria erythrocladioides	753684	Eukaryota	Archaeplastida	93930	359	0.523	2	2	Eukaryota;Archaeplastida;Rhodophyta;Compsopogonophyceae;Erythropeltidales;Erythrotrichiaceae;Madagascaria;Madagascaria erythrocladioides	PF01025	GrpE						0	196	2
contig_28633_1_543_-	543	543	isc:IscW_ISCW014175	zinc finger protein, putative						B7QLE8	KOG1721	FOG: Zn-finger	General function prediction only	POORLY CHARACTERIZED	CAMPEP_0182451114-CAMNT_0024648855	29.67			Timspurckia oligopyrenoides	708627	Eukaryota	Archaeplastida	93930	359	0.6808	3	3	Eukaryota;Opisthokonta;Metazoa;Arthropoda;Chelicerata;Arachnida;Ixodes;Ixodes scapularis	PF00096||PF13894||PF00096||_GAP_	Zinc finger, C2H2 type||PF13894||Zinc finger, C2H2 type||_GAP_						0	3	81
contig_30068_1_389_-	389	389	olu:OSTLU_25682	hypothetical protein						A4S9A6					CAMPEP_0179738332-CAMNT_0021612723	35.4			Ostreococcus lucimarinus clade-A-BCC118000	-311166	Eukaryota	Archaeplastida	93930	359	0.9847	3	2	Eukaryota;Archaeplastida;Chlorophyta;Mamiellophyceae;Mamiellales;Bathycoccaceae;Ostreococcus;Ostreococcus lucimarinus clade-A-BCC118000								0	4	67
contig_30087_1_372_+	498	372													gnl_CMT534C_7094.m000477-CMER	43.55	hypothetical protein	CAM_CRCL_55594	Cyanidioschyzon merolae	45157	Eukaryota	Archaeplastida	93930	359	1	1	1	Eukaryota;Archaeplastida;Rhodophyta;Bangiophyceae;Cyanidiales;Cyanidiales_X;Cyanidioschyzon;Cyanidioschyzon merolae	PF00226||_GAP_	DnaJ domain||_GAP_						0	4	48
contig_30232_1_312_-	312	312													BGIOSGA031885-PA-10Jan_2005	40.68	Putative uncharacterized protein [source:Uniprot/SPTREMBL;Acc:A2Z7G5_ORYSI]	CAM_CRCL_55546	Oryza sativa Indica Group	39946	Eukaryota	Archaeplastida	93930	359	0.7288	5	5	Eukaryota;Archaeplastida;Streptophyta;Embryophyceae;Embryophyceae_X;Embryophyceae_XX;Oryza;Oryza glaberrima	PF00651	BTB/POZ domain						0	4	48
contig_31257_40_461_-	461	422									KOG1727	Microtubule-binding protein (translationally controlled tumor protein)	Cell cycle control, cell division, chromosome partitioning	CELLULAR PROCESSES AND SIGNALING	CAMPEP_0113957896-CAMNT_0000968527	43.4			Rhodosorus marinus CCMP769	-311207	Eukaryota	Archaeplastida	93930	359	0.6732	6	6	Eukaryota;Archaeplastida;Rhodophyta;Stylonematophyceae;Porphyridiales-2;Stylonematales-Group-II;Rhodosorus;Rhodosorus marinus CCMP769	PF00838	Translationally controlled tumour protein						0	6	66
contig_31461_121_387_+	408	267	vcn:VOLCADRAFT_76813	hypothetical protein							KOG0817	Acyl-CoA-binding protein	Lipid transport and metabolism	METABOLISM	AAEL013844-PA-supercont1939	49.4	diazepam binding inhibitor, putative	CAM_CRCL_4733	Phytophthora infestans	4787	Eukaryota	Archaeplastida	93930	359	0.684	2	2	Eukaryota;Archaeplastida;Chlorophyta;Chlorophyceae;Chlorophyceae_X;CW-Chlamydomonadales;Dunaliella;Dunaliella tertiolecta CCMP1320	PF00887	Acyl CoA binding protein						0	0	74
contig_32895_1_678_-	678	678													GRMZM2G362718_P01-2AGPv2	29.73		CAM_CRCL_4808114	Zea mays	4577	Eukaryota	Archaeplastida	93930	359	1	1	1	Eukaryota;Archaeplastida;Streptophyta;Embryophyceae;Embryophyceae_X;Embryophyceae_XX;Zea;Zea mays								0	0	58
contig_3342_1_662_+	662	662													scaffold_702244.1-7Araly1	26.45		CAM_CRCL_46882	Arabidopsis lyrata	59689	Eukaryota	Archaeplastida	93930	359	0.8373	2	2	Eukaryota;Archaeplastida;Streptophyta;Brassicales;Brassicaceae;Camelineae;Arabidopsis;Arabidopsis lyrata								0	78	39
contig_34154_1_413_-	413	413	olu:OSTLU_12475	hypothetical protein; K01090 protein phosphatase [EC:3.1.3.16]		K15423	serine/threonine-protein phosphatase 4 catalytic subunit [EC:3.1.3.16]		3.1.3.16	A4RWD0	KOG0372	Serine/threonine specific protein phosphatase involved in glycogen accumulation, PP2A-related	Carbohydrate transport and metabolism	METABOLISM	CAMPEP_0203006050-CAMNT_0049747677	82.84			Micromonas pusilla CCAC1681	-311174	Eukaryota	Archaeplastida	93930	359	0.4918	96	87	Eukaryota;Archaeplastida;Chlorophyta;Mamiellophyceae;Mamiellales;Bathycoccaceae;Ostreococcus;Ostreococcus lucimarinus CCE9901	PF00149	Calcineurin-like phosphoesterase						0	2	49
contig_3521_1_690_+	690	690													CAMPEP_0118957822-CAMNT_0006905923	30.71			Pyramimonas obovata CCMP722	-311159	Eukaryota	Archaeplastida	93930	359	1	1	1	Eukaryota;Archaeplastida;Chlorophyta;Pyramimonadales;Pyramimonadales_X;Pyramimonadales_XX;Pyramimonas;Pyramimonas obovata CCMP722								0	124	0
contig_35393_1013_1447_+	1574	435													CAMPEP_0190206892-CAMNT_0033920121	37.96			Micromonas sp. NEPCC29	-311216	Eukaryota	Archaeplastida	93930	359	0.684	2	2	Eukaryota;Archaeplastida;Chlorophyta;Mamiellophyceae;Mamiellales;Mamiellaceae;Micromonas;Micromonas sp. NEPCC29								0	8	182
contig_35571_1_449_+	590	449													fgenesh2_kg.1__2442__AT1G22480.1-1Araly1	33.81		CAM_CRCL_21160	Arabidopsis lyrata	59689	Eukaryota	Archaeplastida	93930	359	1	1	1	Eukaryota;Archaeplastida;Streptophyta;Brassicales;Brassicaceae;Camelineae;Arabidopsis;Arabidopsis lyrata	PF02298||_GAP_	Plastocyanin-like domain||_GAP_						0	0	210
contig_35734_1_1283_+	1351	1283									KOG4295	Serine proteinase inhibitor (KU family)	Posttranslational modification, protein turnover, chaperones	CELLULAR PROCESSES AND SIGNALING	CAMPEP_0182619940-CAMNT_0024840175	50.88			Picochlorum RCC944	464278	Eukaryota	Archaeplastida	93930	359	0.4378	4	4	Eukaryota;Archaeplastida;Chlorophyta;Trebouxiophyceae;Chlorellales;Chlorellales_X;Picochlorum;Picochlorum RCC944	_GAP_||PF00014||_GAP_	_GAP_||Kunitz/Bovine pancreatic trypsin inhibitor domain||_GAP_						0	37	346
contig_35867_1022_1450_+	1451	429													CAMPEP_0179701110-CAMNT_0021574213	40.5			Ostreococcus mediterraneus clade-D-RCC2593	-311164	Eukaryota	Archaeplastida	93930	359	0.6793	4	4	Eukaryota;Archaeplastida;Chlorophyta;Mamiellophyceae;Mamiellales;Bathycoccaceae;Ostreococcus;Ostreococcus mediterraneus clade-D-RCC2593								0	2	281
contig_35925_61_705_+	1658	645	ppp:PHYPADRAFT_134589	hypothetical protein						A9SSK7					CAMPEP_0182874626-CAMNT_0025007345	42.86			Nephroselmis pyriformis, Strain CCMP717	156128	Eukaryota	Archaeplastida	93930	359	1	1	1	Eukaryota;Archaeplastida;Chlorophyta;Nephroselmidophyceae;Nephroselmidophyceae_X;Nephroselmidaceae;Nephroselmis;Nephroselmis pyriformis, Strain CCMP717								2	4	146
contig_36063_956_1260_-	1261	305													LOC_Os09g39140.1-9MSU6	27.14	vignain precursor, putative	CAM_CRCL_4010393	Oryza sativa (japonica cultivar-group) mitochondrial	39947	Eukaryota	Archaeplastida	93930	359	1	1	1	Eukaryota;Archaeplastida;Streptophyta;Embryophyceae;Embryophyceae_X;Embryophyceae_XX;Oryza;Oryza sativa (japonica cultivar-group) mitochondrial	_GAP_||PF08246	_GAP_||Cathepsin propeptide inhibitor domain (I29)						0	2	65
contig_36186_26_964_-	964	939									KOG3002	Zn finger protein	General function prediction only	POORLY CHARACTERIZED	GSVIVT01033473001-8IGGP_12x	26.29	SINA2p [Source:UniProtKB/TrEMBL;Acc:Q9XGC3]	CAM_CRCL_11159	Vitis vinifera	29760	Eukaryota	Archaeplastida	93930	359	0.875	9	6	Eukaryota;Archaeplastida;Streptophyta;Embryophyceae;Embryophyceae_X;Embryophyceae_XX;Populus;Populus trichocarpa	_GAP_||PF03145||_GAP_	_GAP_||Seven in absentia protein family||_GAP_						0	2	217
contig_36201_1_627_+	1035	627	cre:CHLREDRAFT_169748	hypothetical protein						A8IKH6					EDP05487-DS496118v3	40	hypothetical protein	CAM_CRCL_13737	Chlamydomonas reinhardtii	3055	Eukaryota	Archaeplastida	93930	359	1	1	1	Eukaryota;Archaeplastida;Chlorophyta;Chlorophyceae;Chlorophyceae_X;CW-Chlamydomonadales;Chlamydomonas;Chlamydomonas reinhardtii								0	3	165
contig_36212_1_1052_+	1308	1052	atm:ANT_25430	hypothetical protein						E8MZM1					CAMPEP_0197844250-CAMNT_0043454949	52.94			Pterosperma, Strain CCMP1384	1461541	Eukaryota	Archaeplastida	93930	359	0.4636	3	3	Eukaryota;Archaeplastida;Chlorophyta;Pyramimonadales;Pyramimonadales_X;Pyramimonadales_XX;Pterosperma;Pterosperma, Strain CCMP1384	PF00024||PF02469	PAN domain||Fasciclin domain						0	11	518
contig_36495_249_1016_+	1666	768													BRADI4G34050.2-4Brachy1	48.78		CAM_CRCL_4100620	Brachypodium distachyon	15368	Eukaryota	Archaeplastida	93930	359	0.9518	6	4	Eukaryota;Archaeplastida;Streptophyta;Embryophyceae;Embryophyceae_X;Embryophyceae_XX;Oryza;Oryza sativa (japonica cultivar-group) mitochondrial	_GAP_||PF01429||_GAP_	_GAP_||Methyl-CpG binding domain||_GAP_						0	0	388
contig_36577_204_446_+	566	243													CAMPEP_0184691822-CAMNT_0027149587	47.3			Porphyridium aerugineum	2792	Eukaryota	Archaeplastida	93930	359	1	1	1	Eukaryota;Archaeplastida;Rhodophyta;Porphyridiophyceae;Porphyridiales;Porphyridiales_X;Porphyridium;Porphyridium aerugineum								0	0	54
contig_36709_176_744_-	744	569													100678074-nvi1215	48.62	POC1 centriolar protein homolog A-like		Nasonia vitripennis	7425	Eukaryota	Archaeplastida	93930	359	0.6221	12	11	Eukaryota;Archaeplastida;Chlorophyta;Chlorodendrophyceae;Chlorodendrales;Chlorodendrales_X;Tetraselmis;Tetraselmis astigmatica, Strain CCMP880	PF00400||_GAP_	WD domain, G-beta repeat||_GAP_						0	1	70
contig_36745_309_977_-	1502	669	olu:OSTLU_17148	hypothetical protein						A4S415					CAMPEP_0187831906-CAMNT_0030972467	58.99			Euplotes focardii TN1	36767	Eukaryota	Archaeplastida	93930	359	0.5935	8	8	Eukaryota;Archaeplastida;Chlorophyta;Prasino-Clade-V;Prasino-Clade-V_X;Pycnococcaceae;Pycnococcus;Pycnococcus provasolii RCC2336	_GAP_||PF00334||_GAP_	_GAP_||Nucleoside diphosphate kinase||_GAP_						0	8	418
contig_36858_411_905_-	1005	495	cre:CHLREDRAFT_126810	NAB1; nucleic acid binding protein						Q8GV23					estExt_fgenesh1_pg.C_10541-C169_V2_scaffold_1	68.75		CAM_CRCL_799	Coccomyxa subellipsoidea	248742	Eukaryota	Archaeplastida	93930	359	0.7594	10	8	Eukaryota;Archaeplastida;Chlorophyta;Chlorodendrophyceae;Chlorodendrales;Chlorodendrales_X;Tetraselmis;Tetraselmis GSL018	PF00313||_GAP_	'Cold-shock' DNA-binding domain||_GAP_						0	23	1630
contig_37012_137_538_+	538	402	bmq:BMQ_2965	LysM domain-containing protein						D5DW23					gi493684119-NZ_AFJC01000009	27.42	chromosome segregation ATPase-like protein		Microcoleus vaginatus FGP-2	756067	Eukaryota	Archaeplastida	93930	359	0.3711	14	11	Eukaryota;Archaeplastida;Chlorophyta;Mamiellophyceae;Mamiellales;Bathycoccaceae;Ostreococcus;Ostreococcus lucimarinus clade-A-BCC118000								0	3	93
contig_37138_1009_1155_+	1401	147	pdx:Psed_3798	Homoserine O-acetyltransferase (EC:2.3.1.31); K00641 homoserine O-acetyltransferase [EC:2.3.1.31]	pdx00920||pdx00270||pdx01100	K00641	homoserine O-acetyltransferase [EC:2.3.1.31]	Cysteine and methionine metabolism	2.3.1.31						CAMPEP_0200052174-CAMNT_0045980745	64.1			Durinskia baltica, Strain CSIRO CS-38	400756	Eukaryota	Archaeplastida	93930	359	0.6808	3	3	Eukaryota;Archaeplastida;Chlorophyta;Prasinophyceae;unclassified Prasinophyceae;unclassified Prasinophyceae_X;unclassified Prasinophyceae_XX;Prasinophyceae sp. RCC2339								0	0	55
contig_3718_48_734_-	734	687													CAMPEP_0183820436-CAMNT_0026065333	31.13			Crustomastix stigmata, Strain CCMP3273	195967	Eukaryota	Archaeplastida	93930	359	1	1	1	Eukaryota;Archaeplastida;Chlorophyta;Mamiellophyceae;Dolichomastigales;Crustomastigaceae;Crustomastix;Crustomastix stigmata, Strain CCMP3273								0	40	684
contig_37206_1_940_-	1225	940													CAMPEP_0187732820-CAMNT_0030838073	30.48			Emiliania huxleyi CCMP370	-311214	Eukaryota	Archaeplastida	93930	359	0.7893	3	2	Eukaryota;Archaeplastida;Chlorophyta;Chlorodendrophyceae;Chlorodendrales;Chlorodendrales_X;Tetraselmis;Tetraselmis astigmatica, Strain CCMP880								2	0	555
contig_37265_135_1040_+	1352	906													BRADI1G11210.1-1Brachy1	36.36		CAM_CRCL_4003808	Brachypodium distachyon	15368	Eukaryota	Archaeplastida	93930	359	1	1	1	Eukaryota;Archaeplastida;Streptophyta;Embryophyceae;Embryophyceae_X;Embryophyceae_XX;Brachypodium;Brachypodium distachyon								0	3	464
contig_37301_126_635_+	1253	510	vcn:VOLCADRAFT_120666	hypothetical protein											CAMPEP_0119191310-CAMNT_0007186317	34.65			Pycnococcus provasolii RCC2336	-311178	Eukaryota	Archaeplastida	93930	359	0.6624	5	5	Eukaryota;Archaeplastida;Chlorophyta;Chlorophyceae;Chlorophyceae_X;CW-Chlamydomonadales;Chlamydomonas;Chlamydomonas chlamydogama, Strain SAG 11-48b	_GAP_||PF00076||_GAP_	_GAP_||RNA recognition motif. (a.k.a. RRM, RBD, or RNP domain)||_GAP_						0	0	535
contig_37325_1828_2916_-	3016	1089													LMXM_26_2320-lmi2217	30.86	hypothetical protein		Leishmania mexicana MHOM/GT/2001/U1103	929439	Eukaryota	Archaeplastida	93930	359	0.842	4	2	Eukaryota;Archaeplastida;Chlorophyta;Chlorophyceae;Chlorophyceae_X;CW-Chlamydomonadales;Polytomella;Polytomella parva								0	6	274
contig_37368_1_970_-	1003	970	vcn:VOLCADRAFT_95903	hypothetical protein											CAMPEP_0177762494-CAMNT_0019278551	28.28			Tetraselmis chuii, Strain PLY429	63592	Eukaryota	Archaeplastida	93930	359	1	1	1	Eukaryota;Archaeplastida;Chlorophyta;Chlorodendrophyceae;Chlorodendrales;Chlorodendrales_X;Tetraselmis;Tetraselmis chuii, Strain PLY429								1	18	269
contig_37416_1_1086_+	1110	1086	tet:TTHERM_01082860	Leishmanolysin family protein (EC:3.4.24.36)											CAMPEP_0187152076-CAMNT_0030126367	35.59			Chattonella subsalsa CCMP2191	44440	Eukaryota	Archaeplastida	93930	359	0.684	2	2	Eukaryota;Archaeplastida;Chlorophyta;Mamiellophyceae;Dolichomastigales;Dolichomastigaceae;Dolichomastix;Dolichomastix tenuilepis								0	25	340
contig_37480_1_987_+	1144	987	aau:AAur_2198	putative chalcone synthase (naringenin-chalcone synthase); K00660 chalcone synthase [EC:2.3.1.74]	aau01100||aau01110	K00660	chalcone synthase [EC:2.3.1.74]	Flavonoid biosynthesis || Circadian rhythm - plant	2.3.1.74	A1R6S8					CAMPEP_0170140376-CAMNT_0010376587	39.66			Dolichomastix tenuilepis	195969	Eukaryota	Archaeplastida	93930	359	1	1	1	Eukaryota;Archaeplastida;Chlorophyta;Mamiellophyceae;Dolichomastigales;Dolichomastigaceae;Dolichomastix;Dolichomastix tenuilepis	PF00195||PF02797	Chalcone and stilbene synthases, N-terminal domain||Chalcone and stilbene synthases, C-terminal domain						0	17	288
contig_37564_1_791_+	791	791													BGIOSGA037065-PA-12Jan_2005	34.38	Putative uncharacterized protein [source:Uniprot/SPTREMBL;Acc:A2ZIH7_ORYSI]	CAM_CRCL_4090996	Oryza sativa Indica Group	39946	Eukaryota	Archaeplastida	93930	359	1	1	1	Eukaryota;Archaeplastida;Streptophyta;Embryophyceae;Embryophyceae_X;Embryophyceae_XX;Oryza;Oryza sativa Indica Group								0	2	81
contig_37933_1_1087_+	1745	1087									KOG3796	Ammonium transporter RHBG	Intracellular trafficking, secretion, and vesicular transport	CELLULAR PROCESSES AND SIGNALING	CAMPEP_0191219466-CAMNT_0035133907	53.54			Prymnesium parvum Texoma1	97485	Eukaryota	Archaeplastida	93930	359	0.684	2	2	Eukaryota;Archaeplastida;Chlorophyta;Prasinococcales;Prasinococcales_X;Prasinococcales-Clade-A;Prasinococcus;Prasinococcus capsulatus, Strain CCMP1194	_GAP_||PF00909	_GAP_||Ammonium Transporter Family			Amt		3	10	4	259
contig_38177_126_559_-	559	434	cur:cur_1817	putative Fe-S oxidoreductase						B1VHX6					142731-ChlNC64A_scaffold_5	32.29			Chlorella variabilis	554065	Eukaryota	Archaeplastida	93930	359	0.5965	3	3	Eukaryota;Archaeplastida;Chlorophyta;Trebouxiophyceae;Chlorellales;Chlorellales_X;Chlorella;Chlorella variabilis								0	1	107
contig_38198_186_419_+	610	234													658893-tca339	45.59	selenoprotein M-like		Tribolium castaneum	7070	Eukaryota	Archaeplastida	93930	359	0.684	2	2	Eukaryota;Archaeplastida;Chlorophyta;Chlorophyceae;Chlorophyceae_X;CW-Chlamydomonadales;Chlamydomonas;Chlamydomonas reinhardtii	PF08806	Sep15/SelM redox domain						0	2	110
contig_38325_1_564_+	564	564													CAMPEP_0193999300-CAMNT_0038624677	20.96			Gloeochaete witrockiana SAG46_84	38269	Eukaryota	Archaeplastida	93930	359	1	1	1	Eukaryota;Archaeplastida;Glaucocystophyta;Glaucocystophyceae;Glaucocystophytes;Glaucocystophytes_X;Gloeochaete;Gloeochaete witrockiana SAG46_84								0	6	88
contig_38445_1_752_-	752	752									KOG0676	Actin and related proteins	Cytoskeleton	CELLULAR PROCESSES AND SIGNALING	ACA1_219820-acan1128	68.4	putative		Acanthamoeba castellanii str. Neff	1257118	Eukaryota	Archaeplastida	93930	359	0.5647	144	75	Eukaryota;Archaeplastida;Streptophyta;Embryophyceae;Embryophyceae_X;Embryophyceae_XX;Zea;Zea mays	PF00022	Actin						0	6	158
contig_38480_1_605_+	783	605	cre:CHLREDRAFT_187914	hypothetical protein						A8HS95					CAMPEP_0203037702-CAMNT_0049780563	27.98			Micromonas pusilla RCC1614	-311175	Eukaryota	Archaeplastida	93930	359	0.8373	2	2	Eukaryota;Archaeplastida;Chlorophyta;Mamiellophyceae;Mamiellales;Mamiellaceae;Micromonas;Micromonas pusilla RCC1614								1	9	615
contig_38588_975_1532_-	1533	558													CAMPEP_0200939284-CAMNT_0047138811	33.87			Tetraselmis striata, Strain LANL1001	3165	Eukaryota	Archaeplastida	93930	359	1	1	1	Eukaryota;Archaeplastida;Chlorophyta;Chlorodendrophyceae;Chlorodendrales;Chlorodendrales_X;Tetraselmis;Tetraselmis striata, Strain LANL1001	PF00024||PF01390	PAN domain||SEA domain						0	4	194
contig_3873_114_1016_+	1828	903													CAMPEP_0198359938-CAMNT_0044066877	63.67			Madagascaria erythrocladioides	753684	Eukaryota	Archaeplastida	93930	359	1	1	1	Eukaryota;Archaeplastida;Rhodophyta;Compsopogonophyceae;Erythropeltidales;Erythrotrichiaceae;Madagascaria;Madagascaria erythrocladioides	PF14344	PF14344						0	3181	129
contig_38786_968_1192_-	1269	225									KOG0548	Molecular co-chaperone STI1	Posttranslational modification, protein turnover, chaperones	CELLULAR PROCESSES AND SIGNALING	CAMPEP_0196579124-CAMNT_0041898593	63.16			Pyramimonas amylifera, Strain CCMP720	-283589	Eukaryota	Archaeplastida	93930	359	1	1	1	Eukaryota;Archaeplastida;Chlorophyta;Pyramimonadales;Pyramimonadales_X;Pyramimonadales_XX;Pyramimonas;Pyramimonas amylifera, Strain CCMP720	_GAP_||PF13414	_GAP_||PF13414						0	18	159
contig_38803_44_334_-	692	291													CAMPEP_0198466844-CAMNT_0044192813	42.42			Prasinophyceae RCC1871	1461544	Eukaryota	Archaeplastida	93930	359	1	1	1	Eukaryota;Archaeplastida;Chlorophyta;Prasinophyceae;Prasinophyceae_X;Prasinophyceae_XX;Prasinophyceae_XXX;Prasinophyceae RCC1871								0	2	98
contig_38961_121_608_-	608	488									KOG1472	Histone acetyltransferase SAGA/ADA, catalytic subunit PCAF/GCN5 and related proteins	Chromatin structure and dynamics	INFORMATION STORAGE AND PROCESSING	DappuP229741-scaffold_263Dappu1	39.39		CAM_CRCL_4038191	Daphnia pulex	6669	Eukaryota	Archaeplastida	93930	359	0.7288	5	5	Eukaryota;Archaeplastida;Chlorophyta;Prasino-Clade-V;Prasino-Clade-V_X;Pycnococcaceae;Pycnococcus;Pycnococcus provasolii RCC2336	_GAP_||PF00439||_GAP_	_GAP_||Bromodomain||_GAP_						0	1	89
contig_38970_838_1158_+	2051	321													CAMPEP_0119211712-CAMNT_0007208865	45.74			Micromonas pusilla RCC2306	-311173	Eukaryota	Archaeplastida	93930	359	0.977	2	2	Eukaryota;Archaeplastida;Chlorophyta;Mamiellophyceae;Mamiellales;Mamiellaceae;Micromonas;Micromonas pusilla RCC2306								0	40	141
contig_39462_1_576_-	600	576	ppp:PHYPADRAFT_143618	hypothetical protein						A9TCQ8	KOG1987	Speckle-type POZ protein SPOP and related proteins with TRAF, MATH and BTB/POZ domains	Cell cycle control, cell division, chromosome partitioning	CELLULAR PROCESSES AND SIGNALING	Sb07g006620.1-7Sbi1	37.04	Putative uncharacterized protein Sb07g006620 [source:UniProtKB/TrEMBL;Acc:C5YJ12_SORBI]	CAM_CRCL_55546	Sorghum bicolor	4558	Eukaryota	Archaeplastida	93930	359	1	1	1	Eukaryota;Archaeplastida;Streptophyta;Embryophyceae;Embryophyceae_X;Embryophyceae_XX;Sorghum;Sorghum bicolor	_GAP_||PF00651||_GAP_	_GAP_||BTB/POZ domain||_GAP_						0	6	73
contig_39490_1_622_-	622	622													CAMPEP_0119157764-CAMNT_0007150383	52.31			Prasinophyceae sp. RCC2339	-311193	Eukaryota	Archaeplastida	93930	359	0.8137	3	3	Eukaryota;Archaeplastida;Chlorophyta;Prasinophyceae;Prasinophyceae_X;Prasinophyceae_XX;Prasinophyceae_XXX;Prasinophyceae CCMP2111								0	3	111
contig_39727_1283_1717_-	1768	435	sta:STHERM_c21690	hypothetical protein						E0RRC1					PYU1_T005787-scf1117875581402pu1	29.77		CAM_CRCL_26951013	Pythium ultimum	65071	Eukaryota	Archaeplastida	93930	359	0.7893	3	2	Eukaryota;Archaeplastida;Streptophyta;Embryophyceae;Embryophyceae_X;Embryophyceae_XX;Zea;Zea mays								0	6	259
contig_39861_1_881_-	1214	881													CAMPEP_0202989384-CAMNT_0049730663	42.03			Micromonas sp. RCC451	-311172	Eukaryota	Archaeplastida	93930	359	0.684	2	2	Eukaryota;Archaeplastida;Chlorophyta;Mamiellophyceae;Mamiellales;Mamiellaceae;Micromonas;Micromonas sp. RCC451	_GAP_||PF12796	_GAP_||PF12796						0	5	166
contig_3990_76_1044_-	1450	969	ppp:PHYPADRAFT_211478	hypothetical protein; K07374 tubulin alpha	ppp04145	K07374	tubulin alpha	Phagosome || Gap junction || Pathogenic Escherichia coli infection		A9SEI4	KOG1376	Alpha tubulin	Cytoskeleton	CELLULAR PROCESSES AND SIGNALING	CAMPEP_0170453798-CAMNT_0010716313	99.27			Favella ehrenbergii, Strain Fehren 1	182087	Eukaryota	Archaeplastida	93930	359	0.5995	125	68	Eukaryota;Archaeplastida;Streptophyta;Embryophyceae;Embryophyceae_X;Embryophyceae_XX;Selaginella;Selaginella moellendorffii	PF00091||_GAP_||PF03953||_GAP_	Tubulin/FtsZ family, GTPase domain||_GAP_||Tubulin C-terminal domain||_GAP_						0	1160	24353
contig_39952_92_502_+	767	411													CAMPEP_0198112516-CAMNT_0043769321	39.39			Craspedostauros australis, Strain CCMP3328	1486917	Eukaryota	Archaeplastida	93930	359	0.5626	9	9	Eukaryota;Archaeplastida;Chlorophyta;Mamiellophyceae;Mamiellales;Mamiellaceae;Mantoniella;Mantoniella antarctica, Strain SL-175								0	0	53
[truncated: 64,446 more rows]

## Sheet: MetaP-Strains-db-1D
Table S2B. Proteins identified from Phaeocystis strains metatranscriptomes (database #1) using 1D analysis
[truncated: 913 more rows]

## Sheet: MetaP-Strains-db-2D
Table S2C. Proteins identified from Phaeocystis strains metatranscriptomes (database #1) using 2D analysis
[truncated: 1,556 more rows]

## Sheet: MetaP-RossSeaMetaT-db-1D
Table S2D. Proteins identified from Ross Sea metatranscriptome (database #2 - split sample for metaP and metaT) - 1D analysis
[truncated: 893 more rows]

[truncated: 5 more sheets: MetaP-RossSeaMetaT-db-2D, MetaP-Bacteria-db-1D, MetaP-Bacteria-db-2D, Count by Taxon, Venn]
